# Supplementary material for: SNP Identification by Transcriptome Sequencing and Candidate Gene-Based Association Analysis for Heat Tolerance in the Bay Scallop Argopecten irradians
Source: PLoS One. 2014 Aug 14;9(8):e104960. doi: 10.1371/journal.pone.0104960 (PMC4133247; doi:10.1371/journal.pone.0104960)
Supplement: Table S6 — List of southern bay scallop-specific SNPs. (XLSX) [file pone.0104960.s009.xlsx]

## Sheet: Sheet1
Unigene ID	position	reference	genotype	major allele	uniq depth	minoe allele	uniq depth	total depth	note:the total depth might be great than the sum of uniq depth of both major and minor allele because of multi-match of reads
all-10000	283	A	W	A	5	T	4	11
all-10052	902	A	R	A	23	G	5	28
all-10057	572	T	K	T	9	G	4	15
all-10057	692	A	M	A	12	C	4	17
all-10057	853	G	S	C	51	G	5	57
all-1006	1350	A	R	G	8	A	5	13
all-1006	1887	A	R	G	5	A	5	10
all-10067	219	C	M	C	7	A	4	13
all-10089	395	T	K	G	7	T	4	11
all-10095	232	C	K	T	6	G	4	10
all-10095	471	G	R	A	6	G	4	10
all-10098	832	C	Y	C	10	T	4	14
all-10098	898	G	K	G	9	T	5	14
all-10116	1148	C	Y	C	25	T	8	33
all-10116	1293	G	R	A	21	G	18	39
all-10122	315	G	R	G	9	A	5	15
all-1015	404	A	R	A	6	G	4	10
all-10178	753	A	W	A	7	T	4	11
all-10214	741	C	Y	C	12	T	8	20
all-10214	993	G	K	G	10	T	4	14
all-10214	1922	C	Y	C	13	T	5	18
all-10215	410	C	R	G	17	A	12	31
all-10271	81	C	S	G	7	C	4	11
all-10271	124	T	W	T	10	A	4	17
all-10274	134	T	Y	C	11	T	6	17
all-10274	561	A	M	A	13	C	5	18
all-10274	710	A	R	G	19	A	16	35
all-10277	351	T	R	A	25	G	6	31
all-10278	351	A	R	A	25	G	6	31
all-1029	794	T	Y	T	31	C	17	49
all-1029	1020	A	R	A	14	G	10	24
all-1029	3285	C	Y	C	54	T	32	86
all-1029	3384	A	R	A	18	G	5	23
all-1029	3434	T	W	T	60	A	27	87
all-1029	3583	A	R	A	70	G	26	97
all-10290	285	A	Y	C	54	T	32	88
all-10290	384	A	R	A	18	G	5	23
all-10291	285	C	Y	C	55	T	32	89
all-10291	384	T	R	A	18	G	5	23
all-10291	434	C	W	T	60	A	27	89
all-10291	583	A	R	A	70	G	26	97
all-10334	1415	C	Y	C	42	T	6	48
all-10337	415	A	Y	C	42	T	6	48
all-10340	415	T	Y	C	42	T	8	50
all-10352	1583	A	W	A	7	T	4	11
all-10353	144	A	R	A	12	G	9	21
all-10367	224	C	M	C	8	A	5	13
all-10390	330	A	W	A	6	T	4	10
all-10406	825	C	Y	C	6	T	4	10
all-10414	144	C	M	C	34	A	5	39
all-10420	333	G	K	T	9	G	6	15
all-10429	864	T	Y	T	9	C	4	13
all-10450	39	A	R	G	6	A	4	10
all-10458	155	T	Y	T	13	C	9	22
all-10458	235	A	R	G	39	A	4	43
all-10485	125	T	Y	C	7	T	4	11
all-10486	400	T	K	T	18	G	14	32
all-10486	595	G	R	G	34	A	8	42
all-10486	742	A	W	A	29	T	12	41
all-10486	1000	C	Y	C	40	T	17	57
all-10486	1195	C	S	C	31	G	11	43
all-10486	1285	C	Y	C	25	T	5	30
all-10486	1414	C	Y	C	31	T	5	36
all-10488	195	T	S	C	31	G	11	43
all-1049	51	T	Y	C	33	T	5	40
all-10491	285	T	Y	C	25	T	5	30
all-10496	1007	G	R	G	10	A	4	14
all-105	278	C	Y	C	33	T	30	63
all-10509	391	A	R	G	6	A	5	11
all-10516	712	T	W	A	34	T	13	47
all-10516	798	G	R	A	7	G	4	11
all-10538	1646	C	Y	C	44	T	7	51
all-10549	177	A	M	C	38	A	4	42
all-10558	2364	A	R	A	7	G	4	11
all-10563	1229	C	Y	C	8	T	5	13
all-10565	6515	A	R	A	21	G	6	27
all-10565	6729	A	W	A	56	T	22	78
all-10565	6770	T	Y	T	46	C	13	59
all-10565	6887	G	R	G	42	A	16	58
all-10565	7476	A	R	G	27	A	25	52
all-10565	7603	C	Y	T	7	C	5	12
all-10565	7775	A	W	T	13	A	12	25
all-10579	502	A	M	C	5	A	4	11
all-10592	239	A	M	A	12	C	6	18
all-10592	1001	T	W	T	18	A	6	24
all-10592	1618	C	Y	C	16	T	5	21
all-10592	1719	G	R	G	30	A	7	37
all-10592	1867	C	Y	C	46	T	7	53
all-10618	1670	G	R	G	6	A	5	11
all-10624	132	C	Y	T	4	C	4	10
all-10641	345	A	R	A	42	G	20	62
all-10641	474	T	W	T	11	A	4	15
all-10641	705	T	W	A	5	T	6	11
all-10651	741	C	Y	C	11	T	4	15
all-10651	1486	G	R	G	9	A	5	14
all-10651	2342	G	R	A	15	G	9	24
all-10651	2682	T	W	T	13	A	9	22
all-10651	2731	T	Y	T	21	C	5	26
all-10651	2899	G	S	C	12	G	9	21
all-10659	602	A	M	C	4	A	4	12
all-10724	315	T	W	T	6	A	6	12
all-10727	625	A	W	A	6	T	4	10
all-10740	1150	G	R	G	11	A	5	16
all-10740	4340	C	Y	C	6	T	4	10
all-10783	125	A	Y	T	6	C	4	11
all-10787	666	C	Y	C	25	T	11	36
all-10787	820	T	K	T	21	G	8	29
all-10787	1067	C	Y	C	28	T	10	38
all-10787	1348	C	Y	C	17	T	9	26
all-10787	1467	A	R	A	16	G	9	25
all-10787	1705	C	Y	C	10	T	6	16
all-10787	1896	A	R	G	9	A	5	14
all-10787	2034	A	R	A	24	G	12	36
all-10787	2766	A	M	A	10	C	4	14
all-10787	2951	C	Y	C	8	T	5	13
all-10787	3047	T	Y	T	7	C	4	11
all-10795	339	T	Y	T	6	C	6	12
all-10813	1098	T	Y	T	7	C	4	11
all-10826	101	G	K	G	11	T	5	16
all-10837	183	A	R	A	4	G	4	10
all-10846	135	T	R	G	4	A	4	12
all-10876	339	G	S	G	9	C	4	15
all-10890	1228	C	Y	C	8	T	4	12
all-10892	228	A	Y	C	8	T	4	12
all-109	439	C	S	C	5	G	5	10
all-10909	325	A	R	G	28	A	5	33
all-10915	665	A	R	A	7	G	4	11
all-10915	713	G	S	G	10	C	4	14
all-10946	572	C	M	C	8	A	5	13
all-10998	1286	A	R	A	6	G	5	11
all-11	286	A	R	A	10	G	5	15
all-11	352	C	M	C	7	A	7	15
all-110	101	C	S	G	10	C	4	17
all-11004	1119	A	W	A	76	T	7	83
all-11004	1268	C	M	C	57	A	14	71
all-11004	1613	C	Y	C	41	T	10	51
all-11004	1837	G	S	G	44	C	9	53
all-11004	2017	C	S	G	33	C	27	60
all-11005	1924	G	K	G	69	T	29	99
all-11005	1978	C	Y	C	50	T	23	73
all-11010	296	A	M	A	40	C	13	55
all-11020	1198	T	Y	C	6	T	4	10
all-11021	198	T	Y	T	10	C	6	16
all-11024	467	A	R	A	6	G	4	10
all-11034	643	G	K	G	11	T	4	15
all-11036	384	A	K	G	5	T	5	11
all-11082	712	T	Y	T	7	C	5	12
all-11113	342	T	R	A	7	G	5	12
all-11129	294	A	R	G	64	A	17	100
all-11134	438	A	R	A	8	G	4	12
all-11163	577	C	S	C	9	G	5	14
all-11167	242	C	M	A	4	C	4	13
all-11168	577	C	S	C	9	G	5	14
all-11185	467	C	M	C	7	A	5	12
all-11203	310	A	Y	T	7	C	7	14
all-11205	5	A	W	A	25	T	13	38
all-11205	199	C	M	C	55	A	22	77
all-11205	375	T	K	T	39	G	20	59
all-11205	2439	G	R	G	69	A	22	91
all-1121	439	C	R	G	69	A	22	91
all-11213	262	T	R	G	57	A	6	64
all-11213	439	T	R	G	69	A	22	91
all-1122	195	T	Y	T	18	C	6	24
all-1122	407	T	Y	T	11	C	4	15
all-1122	550	G	R	A	11	G	5	16
all-1122	976	T	Y	T	7	C	5	12
all-1122	1186	G	R	G	11	A	4	15
all-1122	1321	C	Y	T	6	C	4	10
all-11220	321	A	Y	T	6	C	4	10
all-11221	353	G	S	C	8	G	7	17
all-11221	438	T	W	A	15	T	7	22
all-11262	210	G	R	A	9	G	6	15
all-11263	172	A	R	A	5	G	5	10
all-11267	907	G	R	G	32	A	9	41
all-11267	2029	A	R	A	31	G	14	45
all-11267	2428	A	W	A	35	T	7	42
all-11267	3820	C	Y	C	20	T	6	26
all-1127	1473	T	Y	T	15	C	7	22
all-1127	2221	T	W	T	39	A	5	44
all-1127	2398	A	R	A	23	G	13	36
all-11273	398	T	R	A	23	G	13	36
all-1132	466	C	M	C	10	A	4	14
all-1132	595	A	R	A	17	G	5	22
all-11327	339	A	W	A	13	T	4	17
all-11342	1718	A	R	A	6	G	4	10
all-11352	744	C	Y	C	6	T	4	10
all-1137	1408	C	Y	T	15	C	10	25
all-1137	2827	A	M	A	8	C	5	13
all-1137	5629	T	W	T	41	A	12	53
all-1137	5785	T	Y	T	56	C	10	66
all-11399	501	C	M	A	7	C	4	11
all-1140	703	G	K	G	8	T	5	13
all-11403	895	C	M	C	24	A	6	31
all-11407	74	T	Y	C	29	T	4	33
all-11431	145	T	Y	C	11	T	4	15
all-11469	550	A	R	A	13	G	5	21
all-11469	606	T	K	T	10	G	5	23
all-11470	33	T	R	A	8	G	7	17
all-11476	32	T	Y	C	13	T	4	17
all-1148	921	A	R	G	33	A	13	46
all-1148	1206	C	Y	C	51	T	10	61
all-1148	1476	A	R	A	25	G	6	31
all-11554	3527	C	Y	C	6	T	4	10
all-11554	5477	C	Y	C	9	T	8	17
all-11554	5579	A	R	G	6	A	6	12
all-11554	6740	C	Y	C	22	T	7	29
all-11554	7724	C	Y	C	15	T	7	22
all-11554	7901	T	Y	T	30	C	6	36
all-11554	8120	A	R	A	17	G	7	25
all-11554	8240	C	Y	C	43	T	11	54
all-11562	395	A	R	G	6	A	4	10
all-11575	477	G	Y	C	6	T	4	10
all-11584	760	T	Y	T	19	C	11	30
all-11584	859	C	Y	C	15	T	15	30
all-11584	899	C	Y	T	21	C	15	36
all-11584	1002	G	K	G	27	T	5	32
all-11586	2	G	K	G	27	T	5	32
all-11588	2	C	K	G	27	T	5	32
all-11592	140	G	S	G	74	C	5	83
all-11592	1206	C	Y	C	31	T	23	54
all-11592	1337	G	R	G	8	A	6	14
all-11592	1778	G	K	G	85	T	6	91
all-1160	1074	A	R	A	7	G	4	11
all-11621	285	A	W	A	13	T	4	17
all-11621	583	C	M	C	16	A	5	21
all-11631	1307	T	K	T	13	G	6	19
all-11664	197	A	M	A	13	C	4	17
all-11668	105	A	R	A	9	G	6	16
all-11668	366	A	S	C	5	G	4	10
all-11668	426	A	W	A	8	T	4	12
all-11679	154	C	Y	C	20	T	7	30
all-11679	372	T	Y	T	18	C	16	34
all-11679	413	A	W	A	10	T	10	20
all-11679	822	G	K	G	13	T	8	21
all-11679	1034	G	R	G	23	A	16	39
all-11679	1186	A	R	A	24	G	21	45
all-11679	1423	G	R	G	49	A	16	65
all-11679	4039	T	Y	T	7	C	8	15
all-11690	394	T	K	T	14	G	5	19
all-11690	3323	T	W	T	6	A	4	10
all-11691	323	T	W	T	9	A	4	13
all-11700	301	T	K	G	13	T	5	18
all-11704	231	A	R	A	11	G	8	19
all-11722	269	C	Y	C	8	T	5	13
all-11727	259	C	W	T	10	A	4	14
all-11729	368	G	K	T	6	G	4	11
all-11735	1127	T	K	T	8	G	6	15
all-11737	844	T	Y	C	5	T	5	10
all-11767	798	A	W	A	12	T	5	17
all-11767	904	T	Y	T	45	C	5	51
all-11767	1208	C	Y	C	37	T	8	45
all-11767	1757	A	W	A	76	T	12	88
all-11767	1806	C	Y	C	71	T	6	77
all-11767	2215	A	M	A	48	C	6	54
all-11767	2382	C	Y	C	34	T	14	48
all-11767	2828	G	R	A	9	G	5	14
all-11767	2893	C	Y	C	51	T	7	58
all-11767	3216	T	W	T	12	A	8	20
all-11767	3842	A	R	A	27	G	6	33
all-11767	4142	A	M	A	58	C	7	65
all-11767	4349	G	R	G	35	A	13	48
all-11767	4406	A	W	A	63	T	6	69
all-11767	4448	C	Y	C	40	T	12	52
all-11767	4562	C	Y	C	14	T	11	25
all-11767	4610	A	M	A	15	C	4	19
all-11767	4805	A	W	A	25	T	8	33
all-11767	4871	A	R	A	37	G	17	54
all-11767	5123	C	Y	T	14	C	7	21
all-11767	5273	C	M	C	13	A	12	25
all-11768	273	C	M	C	14	A	12	26
all-1177	273	C	M	C	15	A	12	27
all-1177	1103	G	R	A	5	G	5	10
all-1177	2657	G	K	G	7	T	6	13
all-1177	2864	T	Y	T	7	C	4	11
all-11777	609	A	W	T	6	A	4	10
all-11780	202	G	R	A	6	G	4	14
all-11790	335	C	S	G	12	C	5	21
all-11796	573	C	M	A	57	C	10	67
all-11796	659	G	R	A	33	G	9	42
all-11798	1570	G	R	G	74	A	21	95
all-11798	1711	G	R	G	78	A	20	98
all-11798	2161	C	Y	C	48	T	34	82
all-11824	125	A	K	T	6	G	5	14
all-1183	481	G	R	G	7	A	6	14
all-1183	1001	C	S	C	7	G	4	11
all-11834	393	C	M	C	10	A	5	17
all-1186	895	A	R	A	50	G	14	64
all-1187	2889	G	R	G	7	A	5	12
all-11873	23	A	R	A	6	G	5	11
all-11884	980	G	K	T	6	G	4	10
all-11941	587	C	M	C	5	A	5	10
all-11944	230	T	K	G	9	T	6	15
all-11955	156	C	Y	C	12	T	5	17
all-11955	2072	T	Y	T	13	C	5	18
all-11955	2869	A	R	A	18	G	4	22
all-11955	2937	T	K	T	17	G	5	22
all-11955	3551	G	R	G	10	A	4	14
all-11957	551	A	R	G	10	A	4	14
all-11967	76	A	W	T	10	A	8	18
all-11974	1129	C	Y	C	7	T	4	11
all-1198	453	A	M	A	12	C	4	16
all-11980	453	A	M	A	16	C	4	20
all-11985	1063	A	M	A	18	C	4	24
all-11985	1242	G	R	G	34	A	12	46
all-11987	130	C	R	A	44	G	8	56
all-11988	495	A	W	T	43	A	12	55
all-11993	864	C	Y	C	9	T	4	13
all-11993	1593	G	R	G	10	A	6	16
all-12006	1320	C	Y	T	23	C	11	34
all-12042	151	G	K	T	13	G	4	17
all-1207	262	C	Y	C	32	T	10	44
all-12091	1067	T	Y	T	9	C	5	14
all-12156	267	C	K	T	7	G	4	11
all-12171	882	A	R	A	28	G	9	37
all-12171	1044	G	R	G	7	A	4	11
all-12171	1143	A	M	A	31	C	11	43
all-12173	44	T	R	G	7	A	4	13
all-12173	143	C	M	A	31	C	12	45
all-12192	2528	A	R	G	57	A	30	87
all-12195	473	T	K	G	75	T	4	79
all-12195	528	A	R	G	57	A	30	87
all-12197	469	T	Y	C	74	T	4	78
all-12197	528	A	R	G	57	A	32	89
all-12198	25	C	Y	T	27	C	4	31
all-1221	438	A	R	G	7	A	6	14
all-1221	879	A	R	A	10	G	7	17
all-1221	984	T	Y	T	13	C	10	23
all-1221	1038	C	Y	C	11	T	4	15
all-1221	1434	C	Y	C	6	T	4	10
all-12210	434	C	Y	C	6	T	4	10
all-12249	486	T	W	T	25	A	5	30
all-12249	1122	C	M	C	23	A	14	38
all-12268	80	A	R	A	6	G	4	10
all-1227	296	A	R	A	14	G	5	19
all-12271	242	G	R	A	28	G	4	33
all-12271	318	A	Y	T	6	C	7	15
all-12271	375	A	Y	T	5	C	5	12
all-12312	226	T	K	G	19	T	4	24
all-12312	281	A	M	C	20	A	7	27
all-12312	343	T	Y	C	6	T	4	10
all-12327	1222	G	K	T	17	G	9	26
all-12327	1288	A	W	A	16	T	11	27
all-12327	1402	A	W	A	10	T	9	19
all-12327	1501	A	R	G	17	A	7	24
all-12385	400	C	M	A	77	C	8	85
all-12405	155	A	R	A	10	G	4	14
all-12423	102	A	R	A	17	G	6	23
all-12423	196	C	S	C	49	G	7	56
all-12423	426	G	R	G	12	A	6	19
all-1243	426	G	R	G	20	A	6	27
all-1243	881	C	Y	C	8	T	5	13
all-12475	320	T	W	A	6	T	4	10
all-12513	917	A	M	C	5	A	5	10
all-12516	197	C	M	A	6	C	5	11
all-12618	144	T	K	G	12	T	4	16
all-1262	546	C	M	A	8	C	6	15
all-12624	191	T	K	T	48	G	4	52
all-12624	250	A	M	A	24	C	14	41
all-12624	304	T	K	T	12	G	6	18
all-12624	808	C	Y	C	10	T	6	17
all-1263	671	C	M	A	9	C	8	17
all-12634	321	T	W	T	5	A	5	10
all-12647	268	C	K	T	6	G	4	10
all-12656	139	T	W	T	14	A	4	18
all-12658	144	G	K	T	13	G	4	20
all-1268	249	T	K	G	8	T	5	13
all-1268	307	T	W	A	11	T	10	21
all-1268	357	A	W	A	15	T	5	20
all-12683	307	T	W	A	11	T	10	21
all-12687	627	C	Y	C	11	T	8	23
all-12687	1746	G	K	G	26	T	16	42
all-12687	2496	T	W	T	85	A	11	96
all-12687	3900	A	M	A	26	C	11	37
all-12767	433	T	W	A	8	T	6	15
all-1279	1389	A	R	A	41	G	20	61
all-128	86	A	R	G	60	A	4	64
all-12820	97	T	Y	T	5	C	5	10
all-12821	1614	A	R	A	6	G	4	10
all-12821	3405	C	M	A	13	C	9	22
all-12821	3477	C	S	G	17	C	16	33
all-12821	6002	A	M	A	14	C	11	25
all-12823	2	G	M	A	14	C	11	25
all-12828	2	T	M	A	14	C	11	25
all-12828	133	A	M	A	26	C	12	40
all-1283	2	C	M	A	14	C	11	25
all-1283	763	G	K	T	13	G	7	20
all-1289	91	A	M	A	43	C	20	65
all-12898	91	T	M	A	43	C	20	66
all-1290	36	T	Y	C	6	T	4	10
all-12902	702	G	R	G	6	A	4	10
all-1292	758	A	R	A	12	G	5	17
all-12935	53	G	S	C	6	G	5	11
all-12950	153	C	M	C	47	A	4	51
all-12950	364	T	W	T	6	A	4	10
all-12964	2	C	W	A	8	T	4	12
all-12968	740	T	Y	T	6	C	4	10
all-1298	217	T	K	T	10	G	9	21
all-1302	453	G	K	G	6	T	5	15
all-13025	139	T	K	G	6	T	4	13
all-13042	233	T	Y	T	5	C	5	10
all-13061	689	T	W	T	9	A	6	18
all-13068	234	T	W	A	6	T	4	11
all-13072	530	C	R	G	6	A	4	11
all-13080	1574	C	Y	T	11	C	4	15
all-13099	374	G	K	G	18	T	11	29
all-13128	146	T	K	T	7	G	5	12
all-1313	200	A	W	A	11	T	4	45
all-1313	763	T	W	T	9	A	9	18
all-13148	99	A	W	A	5	T	5	10
all-13164	1227	T	Y	C	18	T	11	29
all-13228	88	G	K	G	5	T	5	10
all-1324	1192	G	R	G	24	A	5	29
all-1324	1270	A	W	A	68	T	20	88
all-13316	1002	A	R	A	6	G	5	11
all-13320	2	T	R	A	7	G	6	13
all-13323	2	T	R	A	7	G	6	13
all-1333	403	C	S	C	11	G	4	44
all-1339	426	A	W	A	6	T	4	10
all-1339	666	G	R	G	11	A	4	15
all-1339	709	C	Y	C	7	T	6	13
all-1339	2173	G	R	A	5	G	6	11
all-1340	1547	C	Y	C	6	T	4	10
all-13401	377	A	M	C	8	A	6	14
all-13416	633	T	W	A	28	T	4	32
all-13419	303	C	Y	C	6	T	4	10
all-13419	1658	C	Y	C	11	T	4	15
all-13434	439	G	S	C	19	G	5	28
all-13434	949	G	S	C	10	G	7	17
all-13434	997	T	Y	T	10	C	7	17
all-13437	542	G	K	T	8	G	6	14
all-13437	1147	T	W	T	7	A	4	11
all-13438	541	C	M	A	7	C	5	12
all-13469	381	T	W	T	5	A	5	10
all-13497	56	T	Y	T	19	C	10	29
all-13497	1112	C	Y	T	7	C	4	11
all-13498	112	T	Y	T	7	C	4	11
all-13517	341	T	Y	C	5	T	5	10
all-13557	669	T	K	T	7	G	5	13
all-13568	412	T	Y	T	5	C	5	10
all-13570	515	A	R	A	5	G	5	10
all-1359	278	C	Y	C	16	T	5	21
all-13608	527	A	R	G	9	A	4	13
all-1361	53	C	Y	C	7	T	4	11
all-1361	787	T	K	T	10	G	4	14
all-1361	1033	G	R	G	9	A	5	14
all-13614	33	T	R	G	9	A	6	15
all-1362	33	C	R	G	9	A	6	15
all-13657	785	A	R	G	8	A	5	13
all-13664	536	T	Y	C	5	T	6	11
all-13679	413	G	R	A	35	G	27	64
all-13679	606	A	W	T	51	A	20	71
all-13679	726	G	K	G	33	T	7	40
all-13679	789	G	R	G	30	A	7	39
all-13679	1020	T	K	T	35	G	6	41
all-13679	1272	T	Y	T	11	C	6	17
all-13679	1557	C	Y	C	26	T	7	33
all-13679	1998	G	R	G	26	A	23	50
all-13679	2188	T	W	T	6	A	5	11
all-13691	234	G	R	A	6	G	5	17
all-13705	218	A	W	T	5	A	5	10
all-1374	96	T	Y	C	6	T	5	13
all-13742	179	G	K	G	7	T	4	11
all-13742	356	G	K	G	6	T	6	12
all-13748	587	T	Y	C	7	T	4	11
all-1378	656	C	M	C	56	A	9	66
all-1378	1168	C	Y	C	27	T	6	33
all-1378	1566	T	Y	T	8	C	4	12
all-1378	2118	A	R	A	11	G	6	17
all-1378	2435	A	W	A	18	T	15	33
all-1378	2513	C	Y	C	19	T	13	32
all-1378	3053	C	Y	C	14	T	7	21
all-1378	5102	G	R	G	23	A	9	32
all-13811	132	T	Y	C	14	T	4	21
all-13816	348	A	M	A	18	C	4	23
all-13819	674	G	W	T	10	A	8	21
all-13894	268	G	K	T	7	G	7	18
all-13914	1248	C	Y	T	8	C	4	12
all-13914	1307	C	M	C	9	A	6	15
all-13929	598	A	W	A	8	T	5	13
all-13983	772	G	M	C	6	A	4	10
all-13988	222	C	Y	T	6	C	4	10
all-13991	1583	G	R	A	7	G	5	12
all-14005	474	C	S	G	6	C	5	11
all-14005	524	A	R	A	6	G	5	11
all-14016	524	A	R	A	10	G	5	15
all-14020	816	C	Y	C	47	T	15	62
all-14020	1094	G	K	G	27	T	5	32
all-14020	1219	C	Y	C	25	T	7	32
all-14020	1287	G	S	C	18	G	9	27
all-14020	1369	A	R	A	35	G	8	43
all-14020	1823	A	R	A	49	G	12	61
all-14020	2172	A	W	A	55	T	22	77
all-14020	2970	C	Y	C	45	T	11	56
all-14022	284	T	W	T	8	A	4	12
all-14067	1246	A	R	A	18	G	6	24
all-14067	1359	A	W	T	8	A	5	13
all-14067	2148	C	Y	C	17	T	6	23
all-14067	2399	T	K	G	14	T	10	24
all-14067	2886	T	W	T	21	A	5	26
all-14067	2931	T	Y	T	19	C	5	24
all-14067	3459	G	R	G	13	A	8	21
all-14067	3624	T	W	T	7	A	5	12
all-14067	3693	A	W	A	13	T	6	19
all-14067	4008	T	Y	T	13	C	7	20
all-14069	8	T	Y	T	13	C	7	20
all-1408	621	A	R	A	66	G	18	84
all-14089	288	G	K	G	6	T	4	10
all-1409	1821	G	R	G	25	A	8	33
all-14120	223	A	Y	T	5	C	4	11
all-14122	703	G	R	G	19	A	5	24
all-14122	761	A	R	A	12	G	10	22
all-14127	78	G	W	T	9	A	4	13
all-14127	122	A	M	A	9	C	5	14
all-14155	111	G	K	G	14	T	4	18
all-14160	818	A	W	T	15	A	10	25
all-14174	675	A	R	A	8	G	4	12
all-1418	306	G	S	G	11	C	5	16
all-14238	746	T	W	T	33	A	15	48
all-14238	1137	A	R	G	27	A	12	39
all-14238	1502	T	Y	T	34	C	7	41
all-14239	137	C	R	G	27	A	12	40
all-1426	2446	T	W	T	8	A	5	13
all-14278	936	T	Y	T	15	C	6	21
all-14289	214	T	M	C	5	A	4	10
all-14300	342	G	R	G	32	A	15	47
all-14300	642	C	Y	C	22	T	19	41
all-14300	866	T	Y	T	13	C	13	26
all-14309	519	A	M	C	37	A	9	46
all-14309	866	A	Y	T	13	C	13	26
all-14312	866	C	Y	T	13	C	14	27
all-14321	866	A	Y	T	13	C	14	27
all-14339	963	A	R	A	10	G	8	18
all-14339	1010	A	R	A	30	G	13	43
all-14339	1097	C	Y	C	15	T	13	28
all-14339	1662	C	Y	C	22	T	13	35
all-14339	2298	G	S	G	27	C	4	31
all-14349	653	T	W	T	29	A	5	37
all-14370	743	C	M	C	12	A	5	17
all-14372	700	T	Y	T	9	C	4	18
all-1438	1102	C	Y	C	7	T	6	13
all-14387	259	G	K	G	12	T	4	16
all-14391	259	C	K	G	12	T	4	18
all-14407	98	C	M	C	7	A	4	11
all-14419	336	C	Y	T	7	C	6	14
all-14425	438	T	K	G	7	T	5	16
all-14430	336	A	Y	T	7	C	8	18
all-14438	212	A	W	T	39	A	35	74
all-14438	301	A	W	A	67	T	4	71
all-14438	431	G	R	A	33	G	28	61
all-14438	1007	G	S	G	32	C	11	43
all-1447	447	T	K	T	9	G	4	13
all-14483	94	A	W	A	7	T	5	12
all-145	1846	A	R	A	40	G	33	73
all-145	2047	C	M	C	69	A	22	100
all-145	2674	A	R	A	37	G	8	45
all-145	2941	C	Y	C	45	T	14	59
all-145	3268	A	R	A	17	G	10	30
all-14502	88	T	Y	C	26	T	6	32
all-14502	139	T	W	T	34	A	8	42
all-14503	2490	G	K	T	10	G	8	18
all-1454	877	G	R	A	7	G	5	12
all-1454	925	A	M	A	7	C	5	12
all-14545	53	T	W	A	12	T	4	16
all-14567	732	T	Y	T	37	C	14	55
all-14579	346	A	W	T	26	A	4	30
all-14585	314	G	S	G	14	C	4	22
all-14589	573	G	K	G	12	T	4	16
all-14597	1055	C	Y	C	43	T	16	59
all-14597	1409	G	R	G	63	A	7	70
all-14597	1478	C	S	C	41	G	5	46
all-14597	1547	C	M	C	38	A	4	42
all-1460	66	T	Y	T	14	C	5	19
all-14607	78	G	S	G	40	C	4	50
all-14607	941	G	R	G	30	A	11	41
all-14607	2036	C	S	C	10	G	4	15
all-14611	188	C	Y	C	5	T	4	11
all-14638	661	C	Y	T	7	C	5	12
all-14638	709	C	Y	T	14	C	9	23
all-14638	817	A	R	A	35	G	6	41
all-14638	1104	T	Y	T	12	C	6	18
all-14638	1227	G	K	T	6	G	6	12
all-14639	227	A	K	T	6	G	6	12
all-14640	227	G	K	G	11	T	6	17
all-14658	327	C	M	C	6	A	4	10
all-14658	681	G	R	G	9	A	4	13
all-14682	1637	G	S	G	16	C	4	20
all-14693	1086	T	W	T	16	A	11	27
all-14693	1355	T	W	T	12	A	4	16
all-14693	1472	T	Y	T	6	C	4	10
all-14693	2204	A	R	A	27	G	5	33
all-14693	2371	A	R	A	14	G	5	19
all-14693	2507	G	K	G	34	T	6	40
all-14707	195	A	M	C	8	A	4	12
all-14711	138	G	R	A	5	G	4	10
all-14733	350	T	Y	T	11	C	4	15
all-14733	401	C	Y	C	5	T	5	10
all-14748	901	G	K	T	11	G	4	15
all-14788	419	C	Y	C	17	T	15	32
all-14788	603	A	W	A	10	T	6	16
all-14788	942	G	R	G	40	A	14	54
all-14789	116	G	Y	C	19	T	7	27
all-14789	812	T	S	C	11	G	7	18
all-14809	2519	G	R	G	13	A	8	21
all-1482	442	G	R	G	7	A	4	11
all-14820	442	G	R	G	10	A	4	14
all-14828	314	T	W	T	4	A	4	10
all-14836	170	T	W	T	7	A	4	11
all-1484	190	T	W	A	8	T	5	13
all-1485	243	C	S	G	5	C	5	10
all-14854	95	G	K	G	28	T	17	45
all-14864	746	G	R	A	6	G	4	10
all-14864	985	A	W	A	8	T	4	12
all-14864	1347	C	Y	C	7	T	5	12
all-14865	66	G	R	G	6	A	4	10
all-14883	835	T	Y	T	9	C	5	16
all-14891	385	T	Y	T	6	C	4	10
all-14934	112	G	K	T	5	G	4	11
all-14970	441	T	K	T	5	G	4	11
all-14971	441	T	K	T	5	G	4	11
all-1499	403	T	W	A	5	T	4	11
all-15010	484	G	R	G	4	A	4	10
all-1504	764	G	K	G	7	T	4	13
all-15042	199	A	R	A	11	G	4	17
all-15063	435	C	K	T	6	G	5	11
all-15081	1804	G	R	A	6	G	5	11
all-15101	1189	G	K	G	10	T	9	19
all-15109	411	G	S	C	8	G	4	16
all-15123	115	T	W	T	5	A	5	10
all-15128	578	A	W	A	12	T	4	16
all-15129	1020	A	R	G	6	A	4	10
all-15130	865	C	Y	C	10	T	8	18
all-15130	2086	C	M	C	7	A	5	12
all-15130	2368	T	Y	C	8	T	5	13
all-1517	488	C	K	T	5	G	5	10
all-15182	260	G	R	A	10	G	8	18
all-15186	445	A	R	A	6	G	4	10
all-15194	340	C	Y	C	6	T	4	12
all-15196	1602	A	R	A	7	G	4	11
all-1520	872	A	W	A	7	T	4	11
all-15201	1473	C	S	C	15	G	7	22
all-15201	2498	C	Y	T	24	C	11	35
all-15212	97	T	W	A	11	T	5	18
all-15222	691	C	M	A	5	C	5	10
all-15249	322	G	W	A	9	T	4	13
all-15259	1595	A	W	A	10	T	6	16
all-15259	1753	G	R	A	5	G	5	10
all-15280	1068	G	R	G	19	A	5	24
all-15287	68	T	R	G	19	A	9	31
all-15295	1132	T	Y	T	6	C	5	11
all-15298	132	G	Y	T	6	C	5	13
all-15332	518	T	K	T	6	G	4	10
all-15358	359	G	R	A	6	G	4	10
all-154	2067	T	W	T	28	A	5	33
all-154	2205	C	Y	C	24	T	6	30
all-154	3039	T	Y	T	30	C	5	35
all-154	3297	C	M	C	27	A	4	31
all-154	3417	C	Y	C	9	T	6	15
all-154	3657	C	Y	C	30	T	8	38
all-154	3699	C	M	C	36	A	6	42
all-154	3846	C	Y	C	32	T	12	44
all-154	4374	T	Y	T	28	C	23	51
all-154	4902	T	Y	C	30	T	14	47
all-154	6128	A	W	A	46	T	8	54
all-154	6255	C	M	A	24	C	13	37
all-154	6558	T	Y	T	42	C	18	60
all-15401	128	A	W	A	46	T	8	54
all-15401	255	A	M	A	25	C	13	38
all-15415	515	C	M	C	12	A	6	18
all-15419	246	T	Y	T	8	C	5	13
all-15425	504	T	K	G	35	T	4	39
all-15461	1048	G	K	T	6	G	5	11
all-15465	1256	T	K	T	7	G	4	11
all-15473	417	C	Y	C	6	T	4	10
all-15492	545	T	Y	T	8	C	5	13
all-15531	298	T	W	A	6	T	5	11
all-15538	684	A	R	G	7	A	4	11
all-1557	75	A	R	A	21	G	6	27
all-1557	129	T	Y	T	42	C	7	49
all-1557	295	G	S	G	42	C	4	47
all-1557	667	A	R	A	10	G	4	23
all-1557	948	T	Y	T	16	C	6	23
all-15599	349	A	R	A	11	G	4	19
all-15599	486	G	K	G	8	T	4	12
all-15636	242	A	R	A	14	G	4	18
all-15636	434	T	W	T	21	A	4	25
all-15636	534	T	Y	T	15	C	6	21
all-15639	242	C	R	A	14	G	4	18
all-15662	137	G	K	T	12	G	5	17
all-15710	56	T	W	T	6	A	4	11
all-15730	306	A	S	C	10	G	10	24
all-15740	162	G	K	G	6	T	4	10
all-15763	237	G	R	A	6	G	5	15
all-15764	51	C	R	G	7	A	4	11
all-15812	428	T	W	A	6	T	4	10
all-15826	254	C	W	A	60	T	23	93
all-1583	196	G	K	G	15	T	4	19
all-1584	1558	T	W	T	12	A	4	16
all-1584	1612	A	R	A	7	G	5	12
all-1584	2195	C	Y	C	7	T	4	11
all-1584	2418	G	S	G	9	C	7	16
all-15844	826	C	Y	T	41	C	10	51
all-15861	155	G	R	G	18	A	14	35
all-15861	238	T	Y	T	24	C	13	39
all-15861	1091	T	Y	T	35	C	5	40
all-15861	1171	G	R	G	23	A	6	29
all-1589	189	C	M	C	7	A	4	11
all-15891	742	G	R	A	6	G	4	10
all-15903	244	C	Y	T	5	C	5	10
all-1592	725	G	R	G	12	A	4	16
all-1592	1358	G	S	C	5	G	5	10
all-1592	2416	T	Y	T	6	C	4	10
all-15956	19	G	R	A	8	G	4	12
all-16013	486	G	S	C	7	G	4	11
all-1604	952	A	W	A	55	T	27	84
all-16043	318	A	R	A	10	G	9	19
all-16043	846	G	R	A	5	G	5	10
all-16043	2300	C	Y	C	13	T	6	19
all-16043	2543	T	Y	C	32	T	13	45
all-16043	3512	C	Y	C	20	T	7	27
all-16043	3581	T	Y	T	18	C	8	26
all-16043	4355	G	R	G	38	A	9	47
all-16043	4850	T	Y	T	46	C	6	52
all-16097	449	A	R	G	18	A	4	22
all-16120	145	G	R	A	7	G	6	13
all-16146	1599	T	W	T	5	A	4	11
all-16146	2036	A	M	A	7	C	5	12
all-16146	3110	T	W	A	13	T	11	24
all-16149	110	A	W	A	13	T	11	24
all-16159	254	G	R	A	47	G	5	52
all-16170	215	A	R	G	30	A	5	35
all-16177	750	T	Y	T	4	C	6	10
all-16179	313	G	S	G	57	C	4	61
all-16247	39	T	K	T	45	G	29	74
all-16269	166	C	Y	T	6	C	5	11
all-16271	166	G	Y	T	6	C	5	13
all-16279	328	G	R	A	6	G	4	10
all-16308	746	T	Y	T	9	C	8	17
all-16338	947	A	R	A	13	G	5	18
all-16357	724	C	Y	C	6	T	5	13
all-1636	1351	C	Y	C	7	T	7	14
all-1636	1432	T	W	T	10	A	4	14
all-1636	1688	A	R	A	11	G	4	15
all-1636	1804	A	R	A	10	G	5	15
all-1636	2957	A	R	A	10	G	6	16
all-1636	3188	A	R	A	8	G	4	12
all-1636	3269	A	R	G	10	A	4	14
all-16371	753	T	W	T	22	A	9	31
all-16371	795	A	R	A	30	G	9	39
all-16371	1016	T	Y	T	14	C	6	20
all-16372	16	C	Y	T	14	C	6	20
all-16386	479	G	K	G	8	T	4	12
all-16391	643	A	R	A	19	G	7	27
all-16391	1392	G	S	G	12	C	6	18
all-16391	1704	G	R	G	10	A	5	15
all-16396	392	C	S	G	12	C	8	20
all-16399	131	A	M	C	19	A	4	23
all-16442	181	T	Y	T	7	C	6	13
all-1645	199	T	K	T	5	G	4	11
all-16468	591	A	M	C	28	A	4	32
all-1649	1889	G	R	G	10	A	4	14
all-1649	2906	A	R	A	14	G	7	21
all-16491	246	A	R	A	18	G	16	36
all-16491	440	A	M	A	26	C	7	34
all-16491	753	A	R	A	15	G	5	20
all-16491	906	A	R	A	31	G	7	38
all-16491	1352	C	Y	C	8	T	7	15
all-16494	1068	T	Y	T	6	C	4	10
all-16571	280	G	R	G	6	A	5	11
all-1659	374	T	W	T	5	A	4	13
all-16683	63	C	Y	C	9	T	6	15
all-16714	610	T	W	T	8	A	8	19
all-16714	2094	A	R	G	14	A	13	27
all-16714	2276	T	Y	T	16	C	5	21
all-16715	94	A	R	A	16	G	14	30
all-16716	94	T	R	A	16	G	14	31
all-1676	336	T	W	T	9	A	5	14
all-16761	169	C	R	G	7	A	5	13
all-16775	379	T	W	T	7	A	5	12
all-16789	301	A	R	G	7	A	4	11
all-16790	89	A	W	T	6	A	4	10
all-16791	301	G	R	G	7	A	4	12
all-16793	453	C	M	C	8	A	4	12
all-16795	415	A	M	A	12	C	7	19
all-16795	802	A	W	T	23	A	14	37
all-16795	1291	A	W	A	17	T	7	24
all-16812	339	C	W	T	6	A	5	13
all-16819	326	G	R	A	8	G	6	14
all-16827	74	T	Y	T	7	C	4	12
all-16834	404	G	K	T	34	G	11	48
all-16834	575	T	K	T	26	G	4	31
all-16834	809	C	Y	C	27	T	17	46
all-16834	926	G	R	G	30	A	11	43
all-16834	1241	T	Y	T	31	C	7	38
all-16834	1355	A	R	A	25	G	18	43
all-16839	241	C	Y	T	31	C	8	39
all-16839	355	A	R	A	25	G	18	43
all-16845	728	C	S	C	20	G	4	24
all-16845	823	G	R	G	13	A	7	20
all-16845	956	G	R	G	14	A	8	22
all-16855	377	A	M	A	6	C	4	11
all-16857	1544	T	K	T	11	G	9	20
all-16857	1807	A	W	A	30	T	19	50
all-16857	1892	T	K	T	33	G	16	49
all-16864	645	A	Y	T	4	C	4	10
all-16868	940	C	Y	T	18	C	15	33
all-16868	1085	T	K	T	18	G	7	26
all-16868	1147	G	S	G	18	C	11	29
all-16868	1231	T	Y	T	15	C	12	27
all-16869	372	G	W	T	20	A	20	40
all-1690	1277	A	R	A	12	G	4	17
all-16909	644	G	K	G	17	T	10	27
all-16910	12	T	K	G	6	T	6	13
all-16924	309	G	R	A	5	G	5	10
all-16936	195	G	R	G	32	A	8	40
all-16939	174	G	R	G	6	A	4	10
all-1698	217	T	Y	C	10	T	4	14
all-16983	413	G	R	G	6	A	4	10
all-170	143	C	M	C	10	A	8	18
all-17023	985	C	Y	T	6	C	4	10
all-17038	983	T	K	T	8	G	5	13
all-17038	1029	A	R	A	9	G	4	13
all-17038	2212	T	W	T	25	A	24	49
all-17039	212	T	W	T	30	A	24	54
all-17040	212	G	W	T	30	A	24	54
all-17044	151	G	Y	C	14	T	13	31
all-17059	455	A	M	A	12	C	4	16
all-17063	339	A	R	G	73	A	5	79
all-1708	327	T	Y	T	6	C	4	12
all-17088	33	C	S	G	4	C	4	10
all-17096	630	A	R	A	10	G	5	15
all-17109	508	C	Y	T	5	C	4	10
all-17122	813	T	K	T	8	G	4	12
all-17155	241	T	Y	C	16	T	6	25
all-17161	106	C	M	C	4	A	5	11
all-17167	55	A	W	A	7	T	4	11
all-17167	449	C	S	G	6	C	5	11
all-17192	1009	A	R	A	10	G	6	16
all-17192	2532	C	S	C	11	G	4	15
all-1721	1061	A	R	A	12	G	4	16
all-1721	1184	T	Y	T	20	C	7	27
all-1721	1688	C	Y	C	36	T	6	42
all-17212	187	T	W	T	26	A	6	33
all-17212	563	C	Y	C	27	T	9	36
all-17212	910	G	K	G	19	T	7	26
all-17212	1088	G	K	G	16	T	13	29
all-17212	1192	G	R	A	25	G	8	33
all-17212	1693	G	R	G	8	A	9	17
all-17212	2101	G	R	G	8	A	5	13
all-17212	2662	C	Y	C	11	T	5	16
all-17212	3736	A	R	A	12	G	5	17
all-17212	4222	G	R	A	6	G	4	10
all-17212	4339	A	R	A	6	G	6	12
all-17212	4600	C	Y	C	10	T	4	14
all-17213	322	G	R	G	5	A	4	10
all-17226	660	A	R	G	6	A	4	10
all-17233	268	C	R	G	8	A	4	12
all-17258	1569	G	R	G	18	A	7	25
all-17288	776	A	W	A	8	T	4	12
all-17289	776	C	W	A	8	T	4	12
all-17290	383	A	R	G	11	A	10	21
all-1732	399	A	R	A	5	G	4	10
all-17351	387	G	K	G	14	T	10	24
all-17351	712	T	Y	T	36	C	22	58
all-17351	1193	C	Y	C	8	T	7	15
all-17360	1738	A	R	G	13	A	4	17
all-17418	665	C	K	T	44	G	5	56
all-1745	680	C	M	A	6	C	6	12
all-1746	388	C	Y	C	9	T	5	15
all-1746	566	C	M	C	8	A	5	13
all-17481	1476	G	R	A	14	G	8	22
all-17481	2508	T	K	T	20	G	7	27
all-17483	219	T	R	A	13	G	5	20
all-17484	454	C	Y	T	24	C	5	29
all-17487	454	T	Y	T	30	C	5	35
all-17487	508	G	K	T	20	G	7	27
all-1754	459	A	W	A	5	T	5	10
all-17545	360	T	W	A	11	T	5	16
all-17546	360	T	W	A	11	T	5	16
all-17559	400	T	Y	T	8	C	4	13
all-17571	352	T	K	T	6	G	4	10
all-17572	296	T	Y	C	6	T	4	10
all-17572	352	T	K	T	6	G	4	10
all-17613	295	G	R	A	8	G	4	12
all-1765	568	T	Y	C	7	T	4	11
all-17682	250	C	S	C	8	G	5	13
all-177	57	G	S	G	5	C	5	10
all-17739	170	A	R	A	6	G	5	12
all-17744	117	A	R	G	64	A	21	85
all-1775	269	T	Y	T	12	C	4	16
all-17753	269	G	Y	T	12	C	4	16
all-17765	946	T	W	T	9	A	4	13
all-17801	114	C	Y	T	6	C	4	10
all-17852	569	G	R	G	6	A	4	10
all-17870	346	C	S	G	7	C	5	15
all-17875	702	A	M	A	23	C	10	34
all-17911	527	C	M	C	16	A	11	27
all-17911	611	G	K	G	13	T	8	21
all-17911	1025	C	Y	C	20	T	11	31
all-17911	1675	C	Y	C	13	T	6	19
all-17911	2464	C	Y	C	9	T	6	15
all-17919	72	T	Y	T	6	C	4	11
all-17965	1119	A	R	G	9	A	8	17
all-17965	1185	C	Y	C	12	T	5	18
all-17974	157	G	K	G	5	T	4	10
all-17983	367	C	Y	C	10	T	4	14
all-18001	1198	G	R	G	7	A	4	11
all-18005	160	A	Y	C	6	T	4	13
all-18019	583	A	M	A	6	C	4	10
all-18037	357	G	S	C	72	G	5	77
all-18040	83	A	M	C	6	A	4	10
all-18043	525	C	Y	C	26	T	8	34
all-18043	786	A	W	A	23	T	14	37
all-18043	1512	A	R	G	7	A	5	12
all-18043	1749	C	M	A	14	C	5	19
all-18043	1886	G	R	G	18	A	10	28
all-18043	1929	C	Y	C	20	T	6	26
all-18043	2154	T	Y	T	15	C	5	20
all-1805	2282	T	Y	T	14	C	6	20
all-18064	184	G	R	A	6	G	4	10
all-1808	575	G	K	G	6	T	4	10
all-1808	1589	A	R	A	5	G	5	10
all-1808	2095	C	Y	C	7	T	7	14
all-18099	212	T	Y	T	7	C	4	12
all-18102	563	T	Y	T	6	C	5	11
all-18107	1253	C	M	A	8	C	8	16
all-18131	92	C	S	G	17	C	5	23
all-1819	487	G	K	T	5	G	5	10
all-18209	699	T	K	T	8	G	4	12
all-18209	808	C	M	C	8	A	4	12
all-18209	1719	G	R	G	20	A	9	29
all-18209	2436	A	R	G	10	A	9	19
all-18209	2561	T	Y	T	18	C	4	22
all-18209	2641	C	Y	C	30	T	8	38
all-18209	3097	A	M	A	8	C	5	13
all-18209	3563	G	R	G	22	A	7	29
all-18209	3810	T	W	T	21	A	9	30
all-18267	149	C	Y	C	7	T	4	13
all-18268	77	A	K	G	6	T	4	10
all-18270	77	G	K	G	6	T	4	10
all-18271	629	A	W	T	6	A	5	11
all-18297	112	C	Y	T	5	C	4	10
all-18335	245	T	K	G	28	T	4	32
all-18343	745	T	W	T	27	A	12	39
all-18343	800	T	K	T	16	G	6	22
all-18343	964	G	R	G	8	A	4	12
all-18343	1148	C	Y	T	12	C	11	23
all-18354	1238	A	M	A	6	C	4	10
all-18364	590	T	W	T	14	A	6	20
all-18372	231	T	Y	C	72	T	18	100
all-18389	125	G	W	A	6	T	4	10
all-18393	778	G	R	G	18	A	6	24
all-18393	1685	C	Y	C	11	T	4	15
all-18394	685	A	Y	C	11	T	4	15
all-18402	24	C	S	G	8	C	4	12
all-18403	246	T	Y	T	6	C	4	10
all-18406	402	C	S	C	9	G	4	14
all-18444	840	C	Y	T	6	C	5	11
all-18472	507	T	Y	T	64	C	7	84
all-18486	489	C	Y	C	9	T	4	13
all-1854	495	G	R	G	17	A	8	25
all-18587	62	G	R	A	6	G	4	10
all-18604	1765	G	R	G	8	A	8	17
all-18604	2011	T	Y	T	17	C	5	22
all-18605	11	G	Y	T	17	C	5	22
all-18607	11	A	Y	T	17	C	5	22
all-18607	206	C	Y	T	5	C	5	10
all-1863	1080	C	M	C	34	A	12	46
all-1863	1161	C	Y	C	21	T	14	35
all-1863	1362	A	R	A	26	G	6	32
all-1863	1596	G	R	G	29	A	13	42
all-1863	2723	G	K	G	23	T	6	29
all-1863	2771	A	R	A	27	G	7	34
all-1863	2902	C	M	C	13	A	4	17
all-1863	3817	T	Y	T	15	C	7	24
all-1863	4375	C	M	C	20	A	4	24
all-1863	4432	C	Y	C	15	T	4	19
all-1863	5614	A	R	G	6	A	4	10
all-18634	1534	C	Y	C	13	T	8	21
all-18634	2491	C	M	C	15	A	6	21
all-18636	227	G	R	A	10	G	7	17
all-18637	491	C	M	C	15	A	6	21
all-1872	541	C	Y	C	6	T	6	12
all-1872	649	G	S	G	5	C	4	10
all-1872	790	C	Y	C	10	T	6	16
all-1872	871	A	W	A	13	T	5	18
all-1872	928	T	W	T	16	A	6	22
all-1872	1603	G	R	G	7	A	5	12
all-1872	1759	G	R	G	8	A	4	12
all-1872	1849	T	W	T	6	A	4	10
all-18720	630	G	R	A	6	G	4	10
all-1875	405	A	W	T	6	A	4	10
all-1875	2188	C	M	C	8	A	4	12
all-18799	71	A	K	G	5	T	4	11
all-1880	2207	C	Y	T	7	C	7	14
all-18807	74	A	K	G	6	T	4	10
all-1881	154	A	R	A	28	G	20	49
all-1881	358	A	R	A	23	G	9	32
all-1881	523	G	S	G	24	C	7	31
all-1881	634	A	R	A	31	G	7	38
all-1881	679	G	R	G	51	A	9	60
all-1881	976	A	R	A	18	G	8	26
all-1881	1324	G	K	G	25	T	7	32
all-1881	1444	T	Y	T	23	C	16	39
all-1881	1641	G	K	G	24	T	5	29
all-1881	1690	T	K	T	22	G	5	28
all-18821	133	C	S	C	9	G	5	16
all-1883	567	C	Y	C	7	T	4	11
all-1884	524	T	Y	C	7	T	7	20
all-18855	1535	A	R	A	51	G	9	60
all-18855	2142	A	W	T	33	A	13	46
all-18855	2640	A	R	A	22	G	8	30
all-18855	2713	A	W	T	54	A	10	64
all-18855	2754	A	R	A	44	G	14	58
all-18855	3237	T	W	T	37	A	11	48
all-18855	3300	G	R	A	14	G	4	18
all-18855	3340	A	R	A	23	G	12	35
all-18856	30	A	W	T	50	A	9	59
all-18856	340	G	R	A	23	G	12	35
all-18864	340	T	R	A	23	G	12	35
all-18865	340	A	R	A	23	G	12	37
all-18867	340	T	R	A	23	G	12	37
all-18918	109	G	S	C	5	G	4	10
all-18921	810	G	R	G	34	A	28	62
all-18960	313	G	S	C	12	G	5	20
all-18988	2946	G	R	G	6	A	5	11
all-18988	3036	C	Y	C	7	T	4	11
all-19020	281	A	W	A	27	T	5	32
all-19020	346	C	Y	T	16	C	14	30
all-19021	346	C	Y	T	16	C	14	30
all-19023	346	C	Y	T	16	C	14	30
all-19042	366	G	K	G	5	T	4	10
all-19050	1173	G	K	G	16	T	13	29
all-19050	2245	C	Y	C	7	T	5	12
all-19050	3453	T	Y	T	8	C	5	13
all-19076	926	G	R	G	10	A	4	14
all-19106	732	G	R	G	6	A	5	11
all-19116	459	T	S	C	13	G	5	19
all-19134	349	A	M	C	4	A	4	10
all-19134	402	C	Y	T	4	C	4	10
all-19199	778	A	M	A	6	C	4	10
all-19199	1172	G	R	G	20	A	9	29
all-19199	1381	G	R	G	23	A	11	34
all-19199	1590	G	R	G	39	A	9	48
all-19199	1849	C	Y	C	34	T	5	39
all-19199	2078	C	M	C	30	A	6	36
all-19199	2410	C	S	G	17	C	10	27
all-19199	3772	T	Y	T	19	C	10	29
all-19199	4457	T	K	G	11	T	8	19
all-19199	5349	G	K	T	16	G	8	24
all-19199	6258	G	K	G	17	T	5	22
all-19199	6482	C	M	A	8	C	6	14
all-192	296	C	M	C	16	A	6	26
all-192	725	A	R	G	9	A	6	16
all-192	852	C	M	C	26	A	5	31
all-192	917	C	Y	C	25	T	7	32
all-192	1089	A	W	A	20	T	6	26
all-19240	507	C	Y	T	8	C	6	14
all-19245	28	A	R	A	10	G	4	17
all-1926	206	C	Y	C	8	T	4	14
all-19270	1239	T	W	T	12	A	4	16
all-19290	558	A	M	A	17	C	6	25
all-19303	409	T	Y	T	15	C	5	24
all-19316	1017	T	Y	T	12	C	7	19
all-19316	1316	T	Y	T	11	C	4	15
all-19319	17	A	Y	T	12	C	7	19
all-19339	138	G	K	T	46	G	4	50
all-19376	147	A	R	A	9	G	4	13
all-19383	161	A	R	G	7	A	5	12
all-19393	55	A	W	T	5	A	5	13
all-1940	669	T	W	T	23	A	9	32
all-1940	958	A	R	A	24	G	9	33
all-19437	112	C	S	C	4	G	11	18
all-19460	502	A	R	A	8	G	7	15
all-19464	502	T	R	A	8	G	7	15
all-195	1803	T	Y	T	6	C	4	10
all-195	2205	G	K	G	7	T	6	14
all-19506	3272	T	W	T	9	A	5	14
all-19506	4321	A	R	A	9	G	4	13
all-19506	5503	G	S	G	10	C	4	14
all-19530	212	A	R	G	6	A	4	14
all-19531	167	G	S	G	5	C	5	10
all-19565	1038	A	M	C	6	A	5	11
all-1960	733	A	W	A	17	T	4	21
all-19627	516	A	W	T	8	A	8	17
all-19627	560	A	R	A	14	G	5	19
all-19644	117	T	K	G	6	T	4	10
all-19674	255	G	K	G	6	T	4	10
all-19684	550	T	S	G	8	C	4	14
all-19697	333	A	W	T	13	A	4	20
all-19715	500	T	Y	T	8	C	5	13
all-19725	84	A	R	A	7	G	6	14
all-19746	271	G	R	G	10	A	8	18
all-19746	1659	G	R	G	10	A	6	16
all-19746	1869	C	Y	C	7	T	6	13
all-19746	2184	T	Y	C	6	T	5	11
all-19770	118	T	W	T	6	A	4	10
all-19796	551	C	Y	C	24	T	19	43
all-19796	698	G	R	G	43	A	17	60
all-19796	794	A	W	T	20	A	19	39
all-19796	1067	C	M	A	18	C	17	35
all-19796	1141	C	Y	C	21	T	11	32
all-19797	141	T	Y	C	21	T	11	32
all-19814	669	A	R	A	6	G	4	10
all-19840	810	A	R	A	23	G	20	43
all-19840	1066	A	W	A	9	T	5	14
all-19900	937	T	Y	T	19	C	5	24
all-19913	251	C	Y	T	6	C	5	14
all-19945	5217	G	R	G	59	A	31	90
all-19945	6299	A	R	A	27	G	8	35
all-1996	701	T	W	A	51	T	8	59
all-19960	365	T	Y	C	5	T	5	10
all-2003	1965	G	S	C	6	G	5	11
all-20070	112	C	Y	T	25	C	5	34
all-20071	276	G	K	T	39	G	5	44
all-20085	566	A	W	A	6	T	6	16
all-20086	576	C	W	A	5	T	5	11
all-20155	397	T	Y	C	5	T	6	11
all-20190	428	T	K	G	16	T	4	20
all-20192	297	T	M	C	34	A	4	39
all-20193	524	A	R	A	9	G	6	15
all-20195	240	T	Y	C	29	T	12	41
all-20195	298	G	K	G	17	T	14	31
all-20197	240	T	Y	C	29	T	14	43
all-20197	298	T	K	G	17	T	15	32
all-20300	86	G	S	C	4	G	4	10
all-20302	67	T	W	A	4	T	5	11
all-20362	336	T	W	T	7	A	5	12
all-20386	155	G	K	G	4	T	4	10
all-20388	155	A	K	G	4	T	4	10
all-204	524	A	M	A	9	C	4	15
all-20401	521	T	Y	T	11	C	7	18
all-20403	344	C	Y	T	11	C	7	18
all-20410	525	G	K	T	16	G	5	21
all-20466	387	C	S	G	7	C	5	15
all-20466	549	A	Y	C	7	T	6	14
all-20476	1162	C	Y	C	6	T	4	10
all-20481	247	A	M	C	4	A	4	10
all-20495	4635	C	Y	C	13	T	11	24
all-20495	5149	G	R	G	18	A	9	27
all-205	640	T	Y	C	5	T	4	10
all-20516	479	G	R	G	8	A	4	12
all-2053	373	G	S	G	39	C	4	46
all-2053	630	G	R	G	15	A	6	21
all-2057	80	G	K	G	8	T	4	13
all-2057	494	C	Y	C	19	T	5	24
all-20609	367	A	R	A	5	G	5	10
all-20611	360	A	R	G	5	A	5	10
all-20617	288	C	S	C	12	G	5	17
all-20640	167	C	Y	T	6	C	5	100
all-20685	253	C	M	A	92	C	5	97
all-20800	819	G	R	A	18	G	4	22
all-20805	614	T	Y	T	11	C	5	16
all-20805	1249	T	W	A	16	T	5	21
all-20805	1969	C	M	C	18	A	5	23
all-20841	410	C	Y	C	32	T	7	39
all-20841	529	T	W	T	26	A	11	37
all-20841	709	T	Y	C	13	T	11	24
all-20841	794	G	S	G	39	C	17	56
all-20841	849	C	Y	C	28	T	7	35
all-20927	760	G	R	G	73	A	13	86
all-20927	1294	G	K	T	50	G	24	84
all-20927	1372	C	Y	C	72	T	9	81
all-20927	1477	C	Y	C	73	T	12	85
all-20927	2038	C	Y	C	47	T	15	62
all-20927	2602	G	S	G	77	C	12	89
all-20935	412	T	R	G	12	A	6	20
all-210	583	C	S	C	27	G	13	41
all-210	721	C	M	A	6	C	4	10
all-21042	602	A	R	A	22	G	5	27
all-21060	31	A	R	G	21	A	18	39
all-21061	31	A	R	G	21	A	18	39
all-21088	288	C	M	C	16	A	6	24
all-21088	353	G	K	G	10	T	4	15
all-2109	132	T	W	A	10	T	6	21
all-2109	247	T	M	C	7	A	8	15
all-2109	353	C	K	G	10	T	4	15
all-21090	288	C	M	C	16	A	6	24
all-21097	534	T	K	T	23	G	4	27
all-21097	597	T	Y	C	14	T	5	20
all-21098	204	G	W	T	20	A	4	25
all-21098	370	C	M	A	7	C	4	11
all-21098	597	C	Y	C	14	T	5	20
all-21100	211	G	K	T	19	G	6	25
all-21101	504	A	S	G	18	C	4	22
all-21118	1391	C	Y	C	66	T	8	74
all-21120	391	A	Y	C	66	T	8	74
all-21122	391	C	Y	C	67	T	8	75
all-21123	391	G	Y	C	67	T	8	77
all-21127	391	A	Y	C	67	T	8	78
all-21128	391	A	Y	C	67	T	8	78
all-21137	637	G	R	A	27	G	24	52
all-21137	727	T	W	T	40	A	9	49
all-21145	1063	G	R	G	9	A	4	13
all-21145	1347	A	W	A	13	T	4	17
all-21145	1478	C	S	C	44	G	12	56
all-21150	63	G	R	G	9	A	4	13
all-21179	6	A	W	T	14	A	4	18
all-21208	568	T	W	T	29	A	7	36
all-21208	635	C	S	G	16	C	12	28
all-21208	846	G	R	A	39	G	27	66
all-21281	141	G	R	A	6	G	4	10
all-21292	655	G	K	G	10	T	4	14
all-21292	865	C	Y	C	6	T	5	11
all-21292	949	C	Y	C	6	T	4	10
all-21292	1075	C	Y	T	10	C	6	16
all-21292	1141	A	R	A	18	G	11	29
all-21292	2302	T	W	T	14	A	6	20
all-21292	2389	T	Y	T	22	C	11	33
all-21292	2579	C	Y	C	17	T	5	22
all-21292	2713	G	R	G	9	A	5	14
all-21292	2941	C	Y	C	13	T	5	19
all-21292	3013	C	Y	C	19	T	17	36
all-21292	3342	C	Y	T	10	C	10	20
all-21292	3422	T	Y	T	19	C	6	25
all-21294	13	A	Y	C	19	T	17	36
all-21321	292	T	Y	C	5	T	4	10
all-21336	354	T	W	A	6	T	4	10
all-21341	501	C	S	C	6	G	5	11
all-21364	822	A	R	A	8	G	5	13
all-21364	2383	G	R	G	6	A	4	10
all-21364	2424	T	W	T	10	A	4	14
all-21364	2507	T	K	G	6	T	4	10
all-21364	2649	T	Y	T	8	C	4	12
all-21384	1012	A	R	A	19	G	5	24
all-21384	1784	T	W	T	10	A	5	15
all-21443	911	A	W	A	12	T	9	21
all-21443	959	A	R	G	11	A	10	21
all-21443	1013	C	Y	C	21	T	5	26
all-21443	1307	G	K	T	13	G	8	21
all-21444	13	G	Y	C	21	T	5	26
all-2145	763	G	R	G	9	A	4	13
all-2145	1029	C	Y	C	6	T	5	11
all-2147	337	A	M	A	53	C	4	57
all-21522	381	G	R	G	7	A	4	11
all-21522	668	A	R	A	8	G	5	13
all-21522	829	G	R	G	6	A	4	10
all-21539	445	A	W	A	6	T	4	10
all-21573	228	C	M	C	6	A	4	12
all-21583	870	C	Y	C	15	T	5	20
all-21583	921	C	Y	C	25	T	8	33
all-21583	3120	C	Y	C	18	T	5	23
all-21584	7	T	K	T	45	G	11	56
all-21620	97	A	R	G	5	A	4	10
all-21641	1265	C	Y	T	18	C	7	25
all-21641	1475	G	R	G	10	A	7	17
all-21641	1529	C	Y	T	8	C	4	12
all-21641	1844	G	R	G	12	A	4	16
all-21641	1910	T	W	T	17	A	7	24
all-21690	611	T	W	T	8	A	4	14
all-21723	673	A	R	A	13	G	5	18
all-21730	497	T	Y	C	6	T	4	10
all-21774	438	G	R	G	4	A	4	10
all-21853	2932	C	Y	C	14	T	5	19
all-21853	3976	C	Y	T	30	C	19	49
all-21872	1263	T	W	T	23	A	9	32
all-2188	1096	C	M	A	22	C	20	42
all-21894	2305	T	K	T	66	G	13	79
all-21977	2038	G	R	A	13	G	13	26
all-21986	557	T	Y	C	8	T	4	12
all-22002	284	A	R	G	6	A	4	10
all-22027	138	A	W	A	8	T	4	12
all-2205	718	T	Y	C	6	T	5	11
all-22065	48	A	K	T	5	G	4	10
all-22074	630	T	Y	T	6	C	4	10
all-22096	5823	T	Y	T	56	C	13	69
all-22096	5974	A	R	A	26	G	5	31
all-22184	113	A	M	A	12	C	4	16
all-2222	293	A	R	G	11	A	10	21
all-2222	354	T	W	T	16	A	4	20
all-2222	1454	A	W	A	17	T	10	27
all-2222	1622	A	R	A	8	G	8	16
all-2222	1667	T	Y	T	11	C	7	18
all-2222	2306	G	R	A	9	G	7	16
all-22220	306	C	R	A	9	G	7	16
all-2223	1138	A	W	T	9	A	6	15
all-2223	1672	T	Y	T	8	C	5	13
all-22254	59	G	S	G	6	C	4	10
all-22256	59	G	S	G	6	C	4	10
all-2227	683	G	R	G	10	A	4	14
all-22277	147	T	Y	T	6	C	4	10
all-22281	642	G	K	T	7	G	5	12
all-22288	642	A	K	T	7	G	5	12
all-22399	407	T	K	G	6	T	4	10
all-22410	673	A	W	T	5	A	5	10
all-2247	632	G	S	G	12	C	11	23
all-22505	813	G	R	A	8	G	5	13
all-22505	1071	C	Y	T	6	C	5	11
all-22598	244	T	Y	C	57	T	29	86
all-22598	383	A	R	G	40	A	39	79
all-22598	432	T	W	T	10	A	9	19
all-22598	628	G	R	G	43	A	9	52
all-22598	1309	G	R	G	13	A	7	20
all-22598	1499	C	Y	T	30	C	23	53
all-22598	1954	T	W	A	43	T	24	67
all-22598	2009	A	R	G	37	A	33	70
all-22598	2086	G	R	A	69	G	25	94
all-22598	2371	A	W	T	9	A	6	15
all-22599	9	A	R	G	37	A	33	70
all-2260	9	G	R	G	37	A	33	70
all-22600	9	A	R	G	37	A	33	70
all-22600	494	A	R	A	8	G	4	12
all-22602	9	C	R	G	37	A	33	71
all-22603	9	T	R	G	37	A	33	71
all-2262	823	C	M	C	12	A	7	19
all-2262	1642	C	Y	C	18	T	5	23
all-2262	2332	T	Y	T	12	C	6	18
all-2263	75	A	R	A	20	G	4	26
all-22658	581	G	R	G	47	A	7	57
all-22667	28	T	R	A	17	G	5	22
all-22727	179	G	S	G	7	C	5	12
all-22730	354	T	W	A	6	T	5	11
all-22730	678	C	Y	C	6	T	4	10
all-22743	1987	T	K	G	12	T	4	16
all-22743	2071	G	R	G	8	A	6	14
all-2279	454	A	M	C	5	A	5	10
all-22846	1595	G	R	G	24	A	6	30
all-22846	2048	G	R	G	48	A	9	57
all-22846	2132	G	K	G	43	T	6	49
all-22846	2237	A	R	A	13	G	4	17
all-22846	2306	C	Y	C	13	T	7	20
all-22846	2408	C	Y	C	13	T	5	18
all-22846	2624	C	Y	C	12	T	7	19
all-22847	48	C	R	G	48	A	9	58
all-22847	132	A	K	G	43	T	6	49
all-22849	237	A	R	A	14	G	4	18
all-22850	132	A	K	G	43	T	6	50
all-22903	687	T	Y	C	12	T	4	16
all-22922	475	C	S	C	36	G	5	41
all-22930	451	A	R	A	5	G	5	10
all-22933	1163	C	S	C	11	G	4	15
all-22933	2219	G	R	A	10	G	4	14
all-22934	219	C	R	A	10	G	4	14
all-22954	1223	C	Y	C	7	T	4	11
all-22954	1510	A	W	A	21	T	4	25
all-22954	1900	C	Y	C	27	T	6	33
all-22954	1968	G	R	G	17	A	5	22
all-22973	1167	G	R	G	16	A	6	22
all-22974	393	T	Y	C	15	T	7	22
all-22984	917	G	S	G	16	C	4	20
all-2300	940	C	Y	C	6	T	5	11
all-23006	68	C	S	C	5	G	4	10
all-23059	96	A	R	G	6	A	4	10
all-23079	148	A	R	A	6	G	4	10
all-23085	516	T	Y	T	47	C	7	57
all-23085	707	G	R	G	68	A	32	100
all-23086	516	T	Y	T	49	C	7	59
all-231	154	G	K	T	6	G	4	10
all-23105	703	C	Y	C	11	T	4	16
all-23106	461	T	M	A	47	C	5	53
all-23106	501	T	R	A	55	G	6	61
all-23115	1473	G	R	G	9	A	8	17
all-23124	358	A	R	A	16	G	4	23
all-2324	521	A	M	C	23	A	6	30
all-2324	608	T	Y	T	15	C	5	20
all-2324	1883	G	R	A	10	G	10	20
all-2324	2246	A	R	G	8	A	8	16
all-23242	246	T	R	G	8	A	8	17
all-23263	402	G	K	G	12	T	8	20
all-23263	641	A	W	A	6	T	5	11
all-23266	79	A	M	A	5	C	5	10
all-23277	441	T	W	A	6	T	4	10
all-23312	1618	T	W	T	9	A	4	13
all-23324	329	A	W	A	5	T	4	10
all-23330	401	A	W	A	9	T	4	15
all-23352	485	C	S	G	6	C	4	10
all-23353	298	C	M	C	38	A	11	49
all-23353	550	A	R	A	54	G	9	63
all-23353	1265	T	K	T	21	G	16	37
all-23353	1997	G	K	G	17	T	6	23
all-23374	469	A	R	A	16	G	6	22
all-23374	748	A	M	C	8	A	6	14
all-23374	943	T	W	T	7	A	5	12
all-23374	1864	C	M	C	14	A	4	18
all-23374	2054	G	K	G	8	T	7	15
all-23374	3449	A	R	A	14	G	4	18
all-23397	899	T	W	T	23	A	8	31
all-23397	956	C	Y	C	19	T	9	28
all-23397	1011	A	R	G	12	A	10	22
all-23397	1060	G	R	G	8	A	8	16
all-23398	11	T	R	G	12	A	10	22
all-23401	11	A	R	G	12	A	11	23
all-23403	227	C	Y	T	50	C	6	59
all-23403	301	C	S	G	34	C	5	40
all-23487	142	G	R	G	8	A	5	15
all-23487	488	T	Y	T	19	C	5	24
all-23487	736	A	W	A	14	T	4	19
all-23487	1056	T	W	T	36	A	8	44
all-23545	690	A	R	G	7	A	4	11
all-2358	1580	T	W	T	7	A	6	13
all-23683	751	G	S	C	6	G	4	10
all-23739	1045	G	K	G	28	T	5	33
all-23786	407	A	W	A	13	T	6	19
all-23786	609	T	W	T	38	A	5	43
all-23786	768	C	Y	C	10	T	9	19
all-23787	246	A	R	G	8	A	4	12
all-2383	110	A	M	A	9	C	7	18
all-23846	474	T	W	T	13	A	5	19
all-23859	1620	G	K	T	22	G	5	27
all-23859	1930	A	W	A	6	T	4	10
all-23871	224	G	K	G	83	T	6	89
all-23871	528	T	Y	C	56	T	43	99
all-23947	228	A	W	A	4	T	4	10
all-23950	452	A	M	A	7	C	5	12
all-23953	452	G	M	A	7	C	5	12
all-24019	610	G	K	G	4	T	4	10
all-24065	552	C	R	A	85	G	8	95
all-2407	666	G	R	A	72	G	13	92
all-24070	105	T	W	T	7	A	4	11
all-24076	758	A	R	A	30	G	17	47
all-2409	303	T	W	T	16	A	4	21
all-2412	194	T	W	T	10	A	4	14
all-24154	1405	C	Y	T	9	C	4	13
all-24154	1471	T	Y	T	6	C	6	12
all-24154	1612	C	Y	T	12	C	12	24
all-24154	1939	C	Y	T	7	C	4	11
all-24154	2074	C	Y	C	8	T	5	13
all-24154	2185	T	W	T	18	A	5	23
all-24154	2587	C	Y	C	17	T	7	24
all-24154	2869	C	Y	C	10	T	4	14
all-24154	3223	C	Y	C	8	T	7	15
all-24154	3845	C	Y	T	6	C	5	11
all-24154	3886	C	Y	C	16	T	12	28
all-24154	5866	G	R	G	27	A	12	39
all-24154	6007	C	Y	C	18	T	9	27
all-24154	6319	A	R	A	10	G	6	16
all-24155	7	T	Y	C	18	T	9	27
all-24155	124	A	M	C	61	A	9	70
all-24156	7	G	Y	C	18	T	9	27
all-24162	180	T	Y	C	28	T	5	33
all-24162	309	T	K	T	17	G	4	21
all-24186	342	T	W	T	14	A	4	19
all-24221	676	A	W	A	17	T	5	22
all-24222	659	C	Y	C	6	T	5	11
all-24222	1067	C	Y	T	7	C	4	11
all-24276	240	T	W	T	91	A	6	99
all-24277	240	T	W	T	91	A	6	99
all-24278	119	G	R	G	6	A	4	10
all-2430	218	C	Y	C	6	T	5	11
all-24339	470	A	R	A	35	G	9	44
all-24341	56	G	R	G	7	A	4	11
all-24341	470	T	R	A	35	G	9	46
all-24345	233	T	Y	C	6	T	4	12
all-24369	1484	C	Y	C	15	T	9	24
all-24369	1688	C	M	C	16	A	7	23
all-24372	115	T	Y	C	5	T	4	10
all-24380	962	G	R	G	50	A	9	59
all-24382	567	T	Y	T	6	C	6	12
all-24383	567	T	Y	T	6	C	6	12
all-24418	95	G	R	A	6	G	4	11
all-24420	1454	T	Y	T	7	C	4	12
all-24423	461	C	M	C	6	A	4	10
all-24431	198	C	Y	C	7	T	4	12
all-24432	198	T	Y	C	7	T	4	12
all-2448	269	T	K	T	12	G	4	16
all-24482	819	G	K	G	5	T	5	10
all-24482	1834	G	R	G	8	A	6	14
all-24482	1987	G	R	G	13	A	6	19
all-24482	2849	A	W	A	12	T	7	19
all-24482	3871	T	Y	T	12	C	6	18
all-24482	4066	T	Y	C	14	T	9	23
all-24482	4123	C	Y	C	29	T	9	38
all-24482	4564	T	Y	T	8	C	8	16
all-24482	4809	C	Y	C	7	T	4	11
all-24490	387	C	Y	C	6	T	4	12
all-24551	880	T	Y	T	7	C	5	12
all-24551	1176	G	R	G	13	A	4	17
all-24551	1262	A	W	A	7	T	4	11
all-24551	2738	G	R	G	9	A	7	16
all-24551	3921	C	S	G	18	C	6	24
all-24565	283	A	W	A	5	T	5	10
all-24568	207	A	M	A	5	C	4	10
all-24581	2949	C	Y	C	73	T	23	96
all-24581	3013	G	R	G	18	A	9	27
all-24582	13	C	R	G	18	A	9	28
all-246	363	T	Y	T	6	C	4	10
all-24631	344	G	S	G	15	C	4	19
all-24640	736	A	S	G	16	C	8	24
all-24640	784	G	K	G	6	T	5	14
all-24702	1233	G	R	A	13	G	8	21
all-24702	1354	C	Y	C	9	T	5	15
all-24776	339	T	K	G	6	T	4	14
all-2479	450	A	W	A	7	T	6	15
all-2481	331	A	R	A	16	G	8	24
all-2481	374	C	Y	C	8	T	6	14
all-2485	1371	A	R	G	11	A	4	15
all-2485	1487	A	M	A	23	C	13	36
all-2485	1531	G	S	G	21	C	15	36
all-2485	1591	G	R	G	41	A	7	48
all-24856	109	T	W	T	4	A	4	10
all-24856	150	C	S	C	4	G	4	10
all-24890	619	T	R	G	77	A	8	89
all-24965	2501	A	M	A	20	C	6	26
all-24965	2576	C	S	C	28	G	7	35
all-24965	2723	C	M	C	32	A	5	37
all-25042	216	T	W	T	13	A	7	20
all-25042	450	A	R	G	10	A	8	18
all-25082	648	T	W	A	6	T	4	10
all-25096	936	T	Y	T	12	C	5	17
all-25099	95	G	S	G	6	C	4	10
all-25136	678	G	R	A	6	G	6	12
all-25136	1941	A	R	A	7	G	4	11
all-25137	303	T	W	A	7	T	4	11
all-25223	413	G	R	A	26	G	5	31
all-2527	1259	G	K	G	45	T	9	54
all-2527	1497	G	R	A	34	G	24	58
all-25270	260	A	M	C	36	A	4	40
all-25273	260	C	M	C	38	A	4	42
all-25344	779	T	Y	T	27	C	5	35
all-2541	66	G	R	A	17	G	8	25
all-2542	1174	G	K	G	7	T	4	11
all-25437	282	G	K	G	6	T	4	10
all-2544	690	T	Y	C	6	T	5	11
all-2550	339	C	W	T	17	A	4	23
all-25539	935	G	R	G	33	A	32	67
all-25539	1379	T	W	T	37	A	21	58
all-25539	1538	G	K	G	61	T	33	94
all-25539	2012	G	K	T	19	G	9	28
all-25539	2116	C	Y	C	19	T	7	26
all-25541	12	C	K	T	19	G	9	28
all-25541	219	T	K	G	88	T	5	93
all-25582	37	C	Y	T	4	C	4	10
all-25588	604	G	K	G	6	T	4	10
all-25600	71	A	W	T	4	A	4	11
all-25602	269	T	Y	T	6	C	4	10
all-25688	503	A	W	A	6	T	4	10
all-25696	60	C	Y	C	6	T	4	10
all-25771	1993	T	Y	T	11	C	5	16
all-25771	2047	G	R	A	9	G	7	16
all-25771	2614	G	R	G	11	A	7	18
all-25771	2920	T	Y	T	28	C	5	33
all-25771	3082	C	Y	C	24	T	5	29
all-25771	3265	T	K	T	12	G	7	19
all-25771	3706	T	K	T	11	G	5	16
all-25771	4154	A	R	A	10	G	7	17
all-25771	4527	G	K	G	31	T	19	50
all-2578	1081	A	R	A	7	G	4	11
all-2578	1168	G	R	G	7	A	4	11
all-2578	1423	C	M	C	6	A	6	12
all-2578	1762	C	Y	C	8	T	4	12
all-2578	1999	T	Y	T	7	C	5	12
all-258	317	T	K	T	57	G	6	63
all-2580	425	T	Y	T	11	C	5	16
all-2580	614	T	Y	C	9	T	6	15
all-25801	425	T	Y	T	25	C	5	30
all-25801	853	C	S	G	6	C	5	12
all-25815	191	A	W	A	6	T	4	12
all-25821	680	C	S	C	11	G	4	18
all-25821	7363	A	R	A	60	G	7	67
all-25824	83	C	M	A	57	C	4	61
all-25832	463	T	K	T	9	G	4	14
all-25854	336	T	M	A	4	C	5	10
all-25879	936	T	K	T	16	G	4	21
all-25879	1302	G	R	A	9	G	6	15
all-25879	1578	A	W	A	25	T	9	34
all-25885	172	A	S	G	22	C	5	27
all-25920	245	T	R	A	9	G	4	13
all-25921	686	T	W	A	77	T	21	98
all-25927	455	G	S	C	6	G	4	10
all-25980	175	C	M	C	6	A	5	11
all-25982	323	T	Y	T	6	C	4	11
all-26007	638	C	S	G	9	C	4	14
all-26042	209	T	M	C	6	A	4	11
all-26045	590	A	R	A	6	G	4	11
all-26056	79	A	R	G	5	A	4	10
all-26078	433	C	R	G	6	A	4	12
all-26112	67	A	W	A	5	T	5	12
all-26114	506	C	M	A	6	C	5	12
all-26279	80	T	S	C	5	G	4	10
all-26300	411	G	S	C	6	G	4	10
all-26302	392	G	R	G	91	A	7	100
all-26302	1973	G	R	G	51	A	5	56
all-2634	354	C	Y	C	8	T	4	12
all-2635	866	C	Y	T	8	C	7	15
all-26389	737	C	Y	C	13	T	4	17
all-264	1573	G	K	G	12	T	7	19
all-2646	704	G	R	G	7	A	4	11
all-2646	751	G	R	A	6	G	4	10
all-26467	751	G	R	A	6	G	5	11
all-26470	372	A	W	T	9	A	5	27
all-26470	599	C	M	C	6	A	4	10
all-26475	751	G	R	A	6	G	5	11
all-2651	1345	G	R	G	11	A	4	16
all-26581	58	C	K	G	7	T	4	11
all-26650	669	A	R	G	5	A	4	11
all-26653	525	C	S	C	30	G	4	34
all-26653	651	C	M	C	20	A	4	24
all-26653	981	A	R	A	20	G	8	28
all-26653	2130	A	M	C	6	A	4	10
all-26653	2802	T	Y	T	26	C	13	39
all-26664	2504	T	Y	C	9	T	4	13
all-26664	2882	A	M	A	22	C	5	27
all-26664	3174	G	K	G	19	T	8	27
all-26664	3644	T	Y	C	8	T	7	15
all-26665	174	T	K	G	19	T	9	28
all-26672	335	T	Y	T	11	C	5	16
all-2668	348	G	S	G	19	C	17	38
all-2673	1319	C	Y	C	6	T	4	10
all-26734	339	G	W	A	9	T	4	13
all-26778	656	C	M	C	18	A	8	28
all-26778	738	T	Y	T	25	C	5	30
all-26778	817	A	W	A	19	T	7	26
all-26778	961	G	R	G	10	A	5	15
all-26778	1060	G	R	G	34	A	6	40
all-26791	127	A	R	A	8	G	8	16
all-26791	382	T	K	T	39	G	12	51
all-26844	640	T	Y	T	6	C	4	10
all-26871	774	G	R	G	20	A	7	27
all-26871	1239	G	K	G	24	T	18	42
all-2691	1472	C	Y	C	14	T	8	22
all-2691	2761	T	Y	T	11	C	9	20
all-26912	510	C	S	C	6	G	4	10
all-26912	761	G	Y	T	11	C	9	20
all-26916	660	T	W	T	11	A	4	15
all-26948	450	T	K	T	6	G	5	11
all-26955	634	G	R	G	22	A	10	32
all-2697	618	T	Y	C	26	T	9	35
all-2697	1477	T	Y	C	10	T	8	18
all-2697	1645	T	W	T	74	A	11	85
all-2697	1685	T	K	T	41	G	8	49
all-26972	645	G	W	T	74	A	11	88
all-26972	685	C	K	T	41	G	8	50
all-26975	645	T	W	T	74	A	11	88
all-26975	685	C	K	T	41	G	8	50
all-26982	685	A	K	T	41	G	8	51
all-27	1308	C	Y	C	11	T	5	16
all-27000	308	A	Y	C	11	T	5	16
all-27001	308	G	Y	C	11	T	5	16
all-27026	604	C	Y	C	14	T	6	20
all-27028	604	T	Y	C	14	T	6	20
all-27046	118	G	R	A	8	G	5	13
all-27051	443	C	Y	C	5	T	5	10
all-27067	710	G	R	G	9	A	4	13
all-27067	1227	A	R	G	10	A	7	17
all-27072	484	T	K	T	6	G	4	10
all-27090	46	C	M	A	48	C	4	62
all-27097	46	T	M	A	48	C	8	67
all-27149	383	A	R	G	5	A	5	10
all-27276	189	T	W	A	4	T	4	11
all-2728	694	C	M	C	7	A	4	11
all-2728	1723	G	S	G	10	C	5	15
all-2728	1828	T	Y	T	12	C	11	23
all-2730	212	C	Y	T	6	C	6	12
all-27309	448	T	K	G	6	T	4	10
all-27319	559	A	M	A	39	C	4	45
all-2738	518	C	S	C	8	G	5	13
all-2738	1068	A	W	A	6	T	5	11
all-2738	1327	C	M	C	15	A	6	21
all-2738	1696	G	R	G	7	A	4	11
all-2738	2308	C	Y	T	7	C	5	12
all-27398	709	T	K	T	5	G	6	11
all-27453	361	T	W	A	9	T	8	17
all-27453	798	C	S	C	10	G	5	15
all-27502	1772	A	R	A	13	G	4	17
all-27502	2280	T	Y	T	9	C	4	13
all-27502	3400	G	R	G	22	A	11	33
all-27502	3712	A	W	A	16	T	9	25
all-27502	4336	G	R	A	15	G	14	29
all-27502	4501	T	W	T	26	A	16	42
all-27502	4576	A	R	A	15	G	14	29
all-27502	4777	G	R	G	20	A	13	33
all-27505	159	A	R	A	6	G	4	10
all-27508	159	C	R	A	6	G	4	10
all-2751	1153	G	R	G	7	A	4	11
all-2751	2679	C	Y	C	7	T	4	11
all-2761	423	G	R	A	6	G	4	10
all-27610	423	C	R	A	6	G	4	11
all-27611	373	T	Y	T	7	C	7	19
all-27611	1027	A	R	A	13	G	8	21
all-27611	1081	C	Y	C	14	T	8	22
all-27611	2104	G	K	T	13	G	9	22
all-27613	104	A	K	T	13	G	9	22
all-27687	656	C	M	A	15	C	10	25
all-27738	3393	G	R	G	6	A	4	10
all-27738	3444	G	R	G	5	A	5	10
all-27738	5176	G	R	G	6	A	5	11
all-27738	5289	T	K	G	7	T	5	12
all-27738	5358	T	Y	T	7	C	6	13
all-27738	6057	C	Y	C	18	T	7	25
all-27738	6863	C	Y	C	11	T	6	17
all-27756	634	T	M	A	12	C	5	17
all-27756	796	A	W	A	8	T	6	14
all-27778	285	G	S	C	5	G	5	10
all-2778	1370	T	W	T	8	A	4	12
all-27794	350	A	S	C	5	G	5	10
all-27828	1838	A	R	G	9	A	5	14
all-27828	1974	G	R	G	36	A	10	46
all-27828	2095	T	W	T	22	A	9	31
all-27831	95	A	W	T	22	A	9	33
all-27838	1298	G	R	G	8	A	4	12
all-27845	759	A	R	G	5	A	5	10
all-2789	606	C	Y	T	6	C	4	10
all-27949	369	T	W	T	5	A	5	10
all-2806	969	C	Y	C	71	T	10	81
all-2806	1049	A	R	A	79	G	20	99
all-2806	1143	C	Y	C	42	T	37	79
all-2806	1345	T	Y	T	56	C	27	83
all-2806	3396	A	R	G	50	A	5	55
all-2806	3566	T	W	T	83	A	10	100
all-2806	5022	G	R	G	13	A	4	17
all-28061	22	C	R	G	13	A	4	17
all-28062	22	G	R	G	13	A	4	17
all-2807	378	A	K	G	5	T	4	10
all-28074	386	A	S	C	4	G	4	10
all-2808	1070	A	R	G	6	A	5	11
all-2808	2300	T	W	T	6	A	4	10
all-28083	300	A	W	T	6	A	4	10
all-28144	379	C	S	C	6	G	4	10
all-28165	447	T	S	G	22	C	4	28
all-28167	122	C	Y	C	18	T	7	25
all-28167	1486	C	Y	C	21	T	10	31
all-2817	459	T	K	T	25	G	4	29
all-2817	860	T	K	T	8	G	5	15
all-2821	1632	C	Y	C	9	T	8	17
all-2821	1682	A	W	A	17	T	4	21
all-28265	70	T	K	T	5	G	5	10
all-2830	1100	A	M	A	7	C	7	14
all-28317	1768	A	R	A	6	G	6	12
all-28317	2043	C	Y	C	15	T	5	20
all-28317	2302	T	W	T	23	A	4	27
all-28318	195	A	R	G	15	A	6	21
all-28328	141	T	Y	T	27	C	8	35
all-28329	141	A	Y	T	27	C	8	35
all-28350	795	G	R	G	87	A	9	100
all-28350	1066	C	S	C	47	G	15	62
all-28350	1470	T	Y	T	10	C	6	16
all-28350	1537	T	Y	T	39	C	7	46
all-28351	66	T	S	C	47	G	15	65
all-28353	66	G	S	C	47	G	15	65
all-28354	470	G	Y	T	10	C	6	16
all-28354	537	T	Y	T	39	C	7	46
all-28418	886	C	S	C	14	G	6	21
all-28418	991	G	R	G	10	A	5	15
all-28418	1226	C	Y	C	28	T	6	34
all-28418	1463	G	S	G	12	C	5	17
all-28418	1573	T	Y	T	9	C	4	13
all-2848	663	G	R	G	7	A	4	11
all-28515	766	A	W	T	9	A	7	17
all-28521	438	A	R	A	6	G	4	10
all-28538	1356	A	R	A	27	G	6	33
all-28547	1836	G	R	G	12	A	7	19
all-2866	1375	A	W	A	10	T	4	14
all-28689	777	T	Y	T	43	C	7	50
all-2869	316	C	Y	C	87	T	6	93
all-2869	490	C	Y	C	54	T	28	82
all-2869	730	T	K	T	63	G	11	74
all-2869	826	T	W	T	64	A	12	76
all-2869	903	A	W	A	64	T	10	74
all-2869	1025	T	K	T	55	G	14	69
all-2869	1086	G	R	G	28	A	27	55
all-2869	1138	A	R	A	17	G	9	26
all-2869	1212	C	Y	C	10	T	4	14
all-28690	25	G	K	T	55	G	14	69
all-28690	86	T	R	G	28	A	27	57
all-28690	129	A	Y	C	16	T	13	29
all-28690	212	A	Y	C	10	T	4	14
all-28692	25	G	K	T	55	G	14	69
all-28692	86	G	R	G	28	A	27	57
all-28697	25	A	K	T	55	G	14	71
all-28729	703	C	R	G	6	A	5	13
all-28741	247	T	K	G	69	T	4	73
all-2877	1131	T	W	T	5	A	5	10
all-28802	815	T	K	G	5	T	5	10
all-28802	1162	G	R	G	32	A	9	41
all-28802	1389	A	M	A	9	C	4	13
all-28802	1662	G	R	A	17	G	6	23
all-28813	394	C	Y	C	6	T	4	10
all-28859	670	T	W	T	39	A	5	46
all-28859	711	C	S	C	31	G	6	40
all-28865	98	T	M	A	15	C	5	23
all-28870	71	G	K	G	5	T	5	10
all-2891	801	G	R	G	7	A	4	11
all-2891	1617	A	R	G	10	A	5	15
all-2891	1686	T	Y	T	6	C	4	10
all-2892	889	C	S	G	7	C	6	13
all-28955	1285	A	R	A	10	G	6	16
all-28977	447	T	W	A	11	T	7	20
all-28997	47	T	W	A	6	T	4	10
all-29	295	C	M	C	6	A	6	13
all-2900	295	G	M	C	6	A	6	17
all-2906	3962	G	R	A	5	G	5	10
all-29084	676	T	W	A	7	T	4	11
all-29084	726	G	K	G	11	T	4	17
all-29084	2937	C	Y	C	8	T	6	14
all-29115	1921	T	Y	T	15	C	5	20
all-29115	1973	C	Y	C	18	T	7	25
all-29135	868	T	Y	C	13	T	11	24
all-29190	308	T	Y	T	6	C	4	10
all-29210	1292	G	R	G	86	A	8	94
all-29210	3653	G	R	G	67	A	10	77
all-29210	3811	C	M	C	51	A	18	69
all-29232	606	A	W	A	14	T	6	20
all-29232	654	A	R	A	15	G	4	19
all-29232	1011	C	Y	C	8	T	5	13
all-29232	1634	T	K	T	19	G	7	26
all-29232	1746	T	W	T	12	A	11	23
all-29232	1800	C	Y	C	19	T	5	24
all-29232	2659	C	Y	C	12	T	8	20
all-29235	422	G	W	T	7	A	4	11
all-29252	153	A	R	A	5	G	4	10
all-29299	557	A	R	A	8	G	6	14
all-29299	743	A	M	C	5	A	6	11
all-29299	1243	A	M	A	22	C	5	27
all-293	182	T	Y	C	7	T	5	12
all-293	3330	C	Y	C	10	T	4	14
all-2930	348	C	M	A	13	C	6	19
all-29301	267	T	Y	C	11	T	4	17
all-29301	329	G	Y	T	15	C	6	26
all-29316	4285	T	Y	T	11	C	5	16
all-29316	6661	C	Y	C	18	T	6	24
all-2932	1287	C	Y	C	12	T	5	17
all-2933	1493	C	Y	C	11	T	4	15
all-2933	1583	T	Y	C	11	T	11	22
all-2933	1676	C	Y	C	15	T	7	22
all-2933	1718	C	Y	T	10	C	8	18
all-2933	1826	T	Y	T	16	C	9	25
all-29363	202	C	M	C	6	A	4	10
all-29372	776	C	S	C	9	G	6	15
all-2939	2405	A	W	A	7	T	4	11
all-29393	205	G	R	A	11	G	8	22
all-29412	565	T	Y	T	14	C	9	23
all-29412	700	G	R	G	9	A	4	13
all-29412	1744	C	M	A	7	C	4	11
all-29412	2076	G	K	T	8	G	4	12
all-29412	2127	G	R	G	7	A	5	12
all-29412	2562	C	Y	T	9	C	8	17
all-29412	2881	T	Y	T	15	C	8	23
all-29418	238	T	W	T	5	A	5	10
all-29502	1297	T	Y	T	71	C	24	95
all-29503	297	A	Y	T	71	C	24	95
all-29504	297	T	Y	T	71	C	24	95
all-296	836	G	K	G	7	T	5	14
all-2963	1125	A	M	A	7	C	4	11
all-29640	114	T	Y	C	91	T	5	96
all-29650	364	T	S	C	89	G	10	99
all-29671	259	C	M	C	6	A	4	10
all-2970	4	A	W	T	7	A	7	15
all-29755	462	T	W	T	7	A	4	11
all-29904	255	A	M	A	6	C	4	10
all-29912	130	A	S	G	5	C	4	12
all-2993	828	T	Y	C	6	T	6	12
all-2993	1606	C	Y	C	43	T	12	55
all-2993	1699	T	Y	T	26	C	9	35
all-2993	1962	C	Y	C	25	T	9	34
all-2993	2229	C	S	C	29	G	5	34
all-2993	2375	C	M	C	26	A	6	33
all-29973	911	C	Y	C	8	T	4	12
all-29973	1734	C	Y	C	10	T	5	15
all-29973	2320	G	R	G	7	A	4	11
all-29973	2815	G	R	G	7	A	5	12
all-29973	3019	G	K	G	9	T	4	13
all-29983	722	C	Y	C	16	T	6	22
all-30002	1640	A	R	A	50	G	9	59
all-30031	97	A	R	A	9	G	4	13
all-30064	286	C	Y	T	6	C	4	11
all-30065	755	C	Y	C	7	T	4	11
all-3011	648	T	Y	T	7	C	5	12
all-30112	322	T	W	T	14	A	5	20
all-3015	867	G	R	G	18	A	19	37
all-3015	1228	T	Y	T	24	C	9	33
all-3015	1586	A	W	A	16	T	8	24
all-3015	1677	C	M	C	17	A	4	21
all-3015	1720	T	K	T	13	G	9	22
all-30151	333	C	M	C	11	A	6	17
all-30180	1548	T	W	A	14	T	8	22
all-30304	338	A	R	A	42	G	7	49
all-30304	452	C	Y	C	45	T	15	60
all-30304	677	G	K	G	71	T	9	80
all-3040	205	T	K	G	92	T	5	97
all-30404	517	T	K	G	13	T	9	23
all-30404	751	A	M	A	7	C	5	12
all-3044	1472	C	Y	C	46	T	8	54
all-3044	1605	T	K	T	39	G	6	45
all-30446	472	A	Y	C	46	T	8	54
all-30446	605	A	K	T	39	G	6	46
all-30450	114	G	K	G	5	T	4	10
all-30453	160	T	Y	T	6	C	4	10
all-3048	854	T	Y	T	7	C	5	12
all-30502	550	T	Y	C	56	T	38	96
all-30502	661	G	R	G	36	A	7	43
all-30502	701	A	R	G	64	A	20	84
all-3055	594	A	W	A	51	T	7	58
all-30599	330	G	R	G	8	A	4	12
all-306	256	A	R	A	16	G	4	22
all-30648	57	T	W	T	6	A	4	10
all-30672	1111	C	Y	C	8	T	4	12
all-30672	1268	C	M	C	16	A	7	23
all-30672	1489	G	K	G	9	T	4	13
all-30672	1810	A	R	A	11	G	8	19
all-30706	419	C	K	T	9	G	7	16
all-30728	486	C	M	A	7	C	4	11
all-30740	1173	A	R	G	6	A	7	13
all-30740	1294	A	R	G	9	A	6	15
all-30740	2797	G	R	G	9	A	4	13
all-30740	3405	T	W	T	23	A	4	27
all-30773	186	A	R	A	7	G	5	12
all-30792	3568	A	R	A	72	G	25	97
all-3081	684	G	M	A	12	C	4	16
all-30828	486	A	M	A	6	C	4	12
all-30828	533	C	Y	T	5	C	4	10
all-30861	308	T	K	T	33	G	6	39
all-30910	315	T	K	T	52	G	19	97
all-30941	652	G	S	C	5	G	4	11
all-30954	1231	T	W	A	7	T	4	11
all-30965	73	T	K	T	6	G	4	10
all-30969	71	T	S	G	6	C	4	12
all-30984	2471	C	Y	C	14	T	5	19
all-30984	3509	C	M	C	6	A	5	11
all-30984	3764	T	W	A	10	T	9	19
all-30984	3806	G	R	A	7	G	6	13
all-30984	4703	G	R	A	9	G	6	15
all-30984	4779	T	Y	T	14	C	7	21
all-30984	5407	A	W	A	17	T	4	21
all-30984	6222	A	W	A	9	T	4	13
all-3099	1541	A	M	A	13	C	4	17
all-3104	340	A	W	A	11	T	4	15
all-31045	715	G	R	G	9	A	5	14
all-31045	1624	C	Y	C	7	T	4	11
all-31082	708	A	R	A	14	G	9	23
all-31092	275	A	M	A	34	C	7	43
all-31092	326	C	Y	T	29	C	30	64
all-31095	326	A	Y	T	29	C	30	64
all-31097	326	T	Y	T	30	C	30	65
all-31097	371	A	Y	T	17	C	12	33
all-31151	82	A	M	C	4	A	4	11
all-31186	292	G	S	C	31	G	4	39
all-31203	418	G	K	T	33	G	4	41
all-3124	1617	G	R	G	9	A	4	13
all-3124	1878	C	Y	C	12	T	4	16
all-31257	142	G	R	G	6	A	4	10
all-31257	2074	C	M	C	7	A	6	13
all-31257	2154	C	Y	C	7	T	4	11
all-31264	575	G	K	T	10	G	4	14
all-3135	2052	A	R	A	30	G	9	39
all-31352	253	T	K	G	34	T	5	39
all-31352	438	C	M	C	5	A	5	10
all-31362	601	G	K	G	48	T	6	56
all-31362	737	G	K	G	45	T	5	51
all-314	526	G	R	G	58	A	16	75
all-31407	71	A	W	T	33	A	4	37
all-3142	710	C	M	C	16	A	4	20
all-3142	973	C	S	C	8	G	8	16
all-31447	315	G	K	G	9	T	4	13
all-31476	792	C	M	C	86	A	13	99
all-31495	55	T	K	G	27	T	4	31
all-31498	167	G	S	G	6	C	4	11
all-31500	71	T	M	A	9	C	6	17
all-31501	71	G	M	A	9	C	6	18
all-3153	275	T	Y	T	19	C	6	25
all-3153	1493	A	W	A	33	T	23	56
all-3153	1577	T	Y	C	39	T	21	60
all-31530	493	A	W	A	33	T	23	56
all-31538	823	C	Y	C	19	T	11	30
all-31538	1015	C	Y	C	14	T	11	25
all-31538	1378	A	W	A	11	T	6	17
all-31538	2005	G	S	C	7	G	4	11
all-31538	2767	C	Y	C	13	T	11	24
all-31555	234	T	Y	T	5	C	5	10
all-31555	1138	A	R	G	9	A	7	16
all-3160	1215	G	R	A	12	G	11	23
all-3160	1455	G	R	G	10	A	4	14
all-3160	1512	A	R	A	14	G	7	21
all-3160	1695	A	R	A	7	G	4	11
all-3160	1998	A	R	A	11	G	5	16
all-31600	336	A	R	G	7	A	4	11
all-3161	708	T	K	T	13	G	4	17
all-3161	1298	T	W	T	56	A	9	65
all-3161	1417	T	Y	T	19	C	5	25
all-3161	2494	T	Y	T	79	C	18	97
all-3161	2746	G	R	G	57	A	11	68
all-31610	494	T	Y	T	79	C	18	97
all-31620	259	T	M	C	5	A	4	10
all-31663	425	T	W	T	24	A	4	30
all-31663	526	T	Y	T	14	C	8	22
all-31676	665	T	W	A	18	T	14	32
all-31676	836	C	Y	C	21	T	5	26
all-3180	597	T	Y	T	7	C	4	11
all-3180	1368	T	W	T	10	A	9	19
all-3202	852	A	R	A	14	G	10	24
all-32023	366	A	M	C	66	A	30	99
all-32055	152	G	K	G	26	T	23	49
all-32058	404	T	R	G	24	A	7	31
all-3206	384	A	R	A	29	G	8	37
all-32073	512	C	S	C	55	G	24	82
all-32073	639	A	R	A	77	G	21	98
all-3208	1613	T	W	T	6	A	4	10
all-32155	2864	G	R	G	20	A	9	29
all-32159	182	T	M	A	16	C	5	21
all-32171	607	C	Y	C	34	T	8	42
all-32171	1377	C	Y	C	58	T	6	64
all-32171	1422	G	R	G	69	A	14	83
all-32171	1565	T	Y	C	17	T	8	25
all-32171	1706	A	W	T	17	A	11	28
all-32171	1863	T	K	G	47	T	9	56
all-3222	766	G	R	G	8	A	6	15
all-32220	84	C	Y	C	13	T	7	20
all-32220	171	T	W	T	12	A	4	16
all-32220	768	T	Y	C	7	T	7	14
all-32378	1040	A	W	T	18	A	7	25
all-32378	1190	C	Y	C	18	T	13	31
[truncated: 12,510 more rows]
