# Supplementary material for: SNP Identification by Transcriptome Sequencing and Candidate Gene-Based Association Analysis for Heat Tolerance in the Bay Scallop Argopecten irradians
Source: PLoS One. 2014 Aug 14;9(8):e104960. doi: 10.1371/journal.pone.0104960 (PMC4133247; doi:10.1371/journal.pone.0104960)
Supplement: Table S9 — KEGG enrichment analysis information of subspecies-specific SNPs. (XLSX) [file pone.0104960.s012.xlsx]

## Sheet: N-specific
Pathway ID	Pathway name	Unigenes with pathway annotation in northern specific SNPs (962)	Totally unigenes with pathway annotation (5135)	P value	corr_P_value	Unigene ID
ko03040	Spliceosome	86 (6.52%)	176 (3.43%)	1.36e-11	2.8695e-09	all-11679; all-13225; all-13768; all-14321; all-1473; all-1584; all-1996; all-24420; all-27921; all-2861; all-29899; all-31257; all-33361; all-37148; all-5076; all-5127; all-51976; all-53170; all-63614; all-70377; all-70752; all-71143; all-71420; all-979; n-10587; n-12451; n-13279; n-14056; n-14709; n-1564; n-15985; n-20062; n-22916; n-2321; n-24717; n-25146; n-2551; n-27382; n-31059; n-32631; n-…
ko03050	Proteasome	27 (2.05%)	44 (0.86%)	5.6624e-07	0.00011948	all-16391; all-17487; all-30672; all-5992; all-9269; n-11238; n-11500; n-12907; n-1378; n-13896; n-20767; n-26708; n-29548; n-3299; n-34873; n-42500; n-4707; n-64277; n-7746; n-8444; n-8883; s-14563; s-18764; s-32000; s-35114; s-54407; s-7182
ko00190	Oxidative phosphorylation	44 (3.34%)	104 (2.03%)	0.000141	0.029751	all-10486; all-1361; all-14788; all-15205; all-18043; all-19945; all-2002; all-23085; all-26302; all-3636; all-40509; all-42452; n-11453; n-11978; n-12821; n-140; n-14101; n-14529; n-16836; n-16882; n-1789; n-18737; n-19770; n-2640; n-30357; n-31661; n-32045; n-34122; n-4656; n-4697; n-5278; n-5720; n-6026; n-62980; n-64333; n-6510; n-9289; s-11409; s-11682; s-21620; s-24661; s-51365; s-51578; s-…
ko03015	mRNA surveillance pathway	45 (3.41%)	115 (2.24%)	0.00094405	0.19919	all-10276; all-2939; all-3752; all-41800; all-4500; all-4822; all-52321; all-70676; all-71454; all-8307; n-12039; n-145; n-17856; n-1965; n-20434; n-20643; n-21831; n-22616; n-24339; n-24975; n-25146; n-2800; n-3456; n-34739; n-35270; n-38656; n-47374; n-47580; n-56331; n-62711; n-63371; n-63680; n-6467; n-65193; n-7298; s-10080; s-13241; s-14755; s-1480; s-28047; s-29688; s-36122; s-53591; s-621…
ko00020	Citrate cycle (TCA cycle)	22 (1.67%)	46 (0.9%)	0.00095134	0.20073	all-18043; all-4045; all-5065; all-64882; all-71222; n-11453; n-12212; n-12821; n-14589; n-2058; n-21238; n-24105; n-2417; n-30277; n-36512; n-3967; n-63364; n-65331; n-7270; n-7489; s-11409; s-52709
ko03013	RNA transport	78 (5.91%)	228 (4.44%)	0.0021021	0.44354	all-10583; all-13768; all-14454; all-16083; all-25136; all-293; all-2939; all-31257; all-3322; all-33665; all-37727; all-3792; all-38274; all-3977; all-41800; all-47102; all-4822; all-52321; all-5814; all-62086; all-70683; all-71372; all-7409; all-7880; all-8307; all-844; all-979; n-10106; n-11701; n-145; n-14963; n-15057; n-15574; n-16246; n-17856; n-2243; n-25146; n-27022; n-2732; n-32706; n-34…
ko04122	Sulfur relay system	7 (0.53%)	11 (0.21%)	0.0087995	1	all-944; n-14304; n-28498; n-43393; n-7282; n-8543; s-52266
ko04145	Phagosome	48 (3.64%)	141 (2.75%)	0.015529	1	all-12329; all-1361; all-19383; all-20495; all-2057; all-23859; all-26302; all-32556; all-34491; all-35395; all-40509; all-42436; all-42452; all-4259; all-43963; all-476; all-52034; all-52255; all-58490; all-5965; all-597; all-6404; all-70410; all-8575; n-11978; n-140; n-14529; n-16836; n-16882; n-18737; n-19770; n-21277; n-2147; n-22123; n-28033; n-2925; n-30205; n-32433; n-4145; n-43878; n-4518…
ko00670	One carbon pool by folate	15 (1.14%)	35 (0.68%)	0.019784	1	all-1339; all-21641; all-22117; all-5980; all-63998; all-71440; n-24662; n-44875; n-509; n-7029; n-7887; s-16330; s-25318; s-40803; s-5739
ko00830	Retinol metabolism	15 (1.14%)	35 (0.68%)	0.019784	1	all-10150; all-12563; all-14339; all-15101; all-19343; all-8410; n-1346; n-18799; n-20777; n-33956; n-34403; n-36668; n-64986; n-8362; s-40350
ko03008	Ribosome biogenesis in eukaryotes	39 (2.96%)	115 (2.24%)	0.029004	1	all-12655; all-13041; all-33665; all-4097; all-54675; all-5741; all-64007; all-66667; all-71096; all-7257; all-7409; n-10273; n-13404; n-15057; n-15908; n-1901; n-214; n-2199; n-21995; n-2732; n-3911; n-4054; n-46047; n-4993; n-5085; n-62781; n-62785; n-63881; n-645; n-64523; n-65193; n-65292; n-7290; n-8755; s-22496; s-44305; s-6489; s-6767; s-8985
ko00511	Other glycan degradation	19 (1.44%)	49 (0.95%)	0.029594	1	all-10998; all-41713; all-45608; all-4802; all-5020; all-64322; all-6949; all-70634; all-71180; n-12207; n-1713; n-19824; n-32; n-3757; n-48010; n-64238; n-64295; s-45587; s-7862
ko04540	Gap junction	10 (0.76%)	22 (0.43%)	0.034937	1	all-12184; all-1445; all-2223; all-34491; all-4586; n-29101; n-59587; n-644; s-14930; s-5859
ko04650	Natural killer cell mediated cytotoxicity	22 (1.67%)	60 (1.17%)	0.038635	1	all-18402; all-24551; all-2891; all-41717; all-5339; all-6962; n-17252; n-18699; n-2144; n-2229; n-35268; n-47331; n-51230; n-6; n-63232; n-63533; n-644; s-23514; s-41077; s-51644; s-54856; s-5859
ko03018	RNA degradation	34 (2.58%)	102 (1.99%)	0.05009	1	all-13503; all-2173; all-22608; all-39236; all-48275; all-5351; all-56104; all-707; all-71009; all-71844; all-7302; n-17856; n-20555; n-32525; n-3531; n-36728; n-39803; n-43828; n-46306; n-46420; n-48135; n-53070; n-55133; n-63639; n-64180; n-6945; n-7763; n-937; s-10863; s-27278; s-38635; s-46538; s-51731; s-696
ko04623	Cytosolic DNA-sensing pathway	13 (0.99%)	33 (0.64%)	0.058216	1	all-17662; all-3536; all-4040; n-10414; n-19545; n-2109; n-25382; n-28878; n-44924; n-65147; s-23052; s-3923; s-5564
ko04330	Notch signaling pathway	17 (1.29%)	46 (0.9%)	0.059904	1	all-10565; all-25600; all-2935; all-39622; all-70548; n-16133; n-33125; n-34626; n-3514; n-3811; n-43603; n-625; n-62704; n-70; n-7388; n-8033; s-25102
ko04962	Vasopressin-regulated water reabsorption	6 (0.45%)	12 (0.23%)	0.061071	1	n-2147; n-22123; n-6105; n-64985; n-7175; s-12150
ko03060	Protein export	11 (0.83%)	27 (0.53%)	0.062299	1	all-2046; all-7113; n-17527; n-25112; n-26747; n-3329; n-38677; n-49101; n-63027; s-15999; s-52448
ko04966	Collecting duct acid secretion	2 (0.15%)	2 (0.04%)	0.065942	1	all-42452; n-19770
ko00380	Tryptophan metabolism	24 (1.82%)	71 (1.38%)	0.077745	1	all-21443; all-3124; all-3180; all-3235; all-37470; all-39353; all-45429; all-53318; all-56459; all-62218; all-7186; n-11562; n-2417; n-33956; n-41720; n-63596; n-8886; s-20016; s-27877; s-31024; s-39496; s-46815; s-53787; s-9507
ko04730	Long-term depression	6 (0.45%)	13 (0.25%)	0.089495	1	all-12184; all-1445; all-2223; n-12039; n-59587; s-52211
ko00062	Fatty acid elongation in mitochondria	6 (0.45%)	13 (0.25%)	0.089495	1	all-21443; all-22846; all-6721; n-41720; n-48696; s-39496
ko00280	Valine, leucine and isoleucine degradation	27 (2.05%)	83 (1.62%)	0.096776	1	all-21443; all-3124; all-3180; all-3211; all-3235; all-39353; all-41627; all-51772; all-5365; all-6721; all-7016; all-7422; n-2170; n-2641; n-36512; n-4135; n-41720; n-48696; n-55367; n-5884; n-63129; n-857; s-39496; s-39772; s-46562; s-46815; s-8008
ko03020	RNA polymerase	19 (1.44%)	56 (1.09%)	0.10491	1	all-17662; all-36328; all-37480; all-38701; all-58372; all-5894; all-67493; n-10414; n-19118; n-19545; n-2109; n-25382; n-410; n-43523; n-53492; n-65147; s-3923; s-52454; s-54322
ko00620	Pyruvate metabolism	21 (1.59%)	63 (1.23%)	0.10707	1	all-3180; all-3235; all-341; all-39353; all-54577; all-71222; n-12212; n-14589; n-16273; n-24105; n-36512; n-39650; n-42871; n-62733; n-63256; n-64836; n-65331; s-37126; s-45780; s-46815; s-4890
ko04630	Jak-STAT signaling pathway	16 (1.21%)	46 (0.9%)	0.108	1	all-10565; all-1698; all-18402; all-5643; all-7105; n-17252; n-2144; n-36041; n-5000; n-63232; n-644; n-8033; s-25102; s-30401; s-51644; s-5859
ko05322	Systemic lupus erythematosus	3 (0.23%)	5 (0.1%)	0.11078	1	n-18026; n-65334; s-1397
ko00260	Glycine, serine and threonine metabolism	17 (1.29%)	51 (0.99%)	0.13748	1	all-10052; all-10618; all-16714; all-23125; all-33106; all-39353; all-63998; all-70957; all-71440; all-7186; all-7816; n-36512; n-4177; n-5053; n-7389; n-875; s-53446
ko03022	Basal transcription factors	20 (1.52%)	62 (1.21%)	0.14818	1	all-15524; all-1654; all-4995; all-54229; all-71873; all-7801; n-12291; n-25620; n-39587; n-53660; n-53972; n-62341; n-63584; n-64810; n-655; n-9841; s-19362; s-53361; s-53831; s-54166
ko04141	Protein processing in endoplasmic reticulum	66 (5%)	230 (4.48%)	0.16062	1	all-11246; all-11874; all-13857; all-1520; all-16468; all-17538; all-18004; all-18126; all-18605; all-19383; all-19746; all-22241; all-22800; all-2732; all-29742; all-29899; all-31986; all-3622; all-4624; all-46571; all-5814; all-58352; all-6673; n-11533; n-12029; n-13422; n-14117; n-14184; n-14339; n-14438; n-15655; n-15737; n-1915; n-2080; n-25112; n-262; n-295; n-31059; n-31748; n-3573; n-3842…
ko04940	Type I diabetes mellitus	2 (0.15%)	3 (0.06%)	0.16399	1	all-22058; s-41077
ko00030	Pentose phosphate pathway	14 (1.06%)	42 (0.82%)	0.16735	1	all-11159; all-11381; all-3125; all-34383; all-35933; all-4888; all-71093; all-71805; n-33209; n-39065; n-43930; n-6750; s-11119; s-32590
ko04614	Renin-angiotensin system	5 (0.38%)	12 (0.23%)	0.17189	1	all-2933; all-45919; n-15614; n-24933; n-51379
ko00630	Glyoxylate and dicarboxylate metabolism	11 (0.83%)	32 (0.62%)	0.1759	1	all-45429; all-5065; all-64882; n-2058; n-21238; n-65331; n-857; s-39772; s-46562; s-46815; s-8008
ko00400	Phenylalanine, tyrosine and tryptophan biosynthesis	3 (0.23%)	6 (0.12%)	0.18033	1	all-6140; n-63428; n-8854
ko00790	Folate biosynthesis	10 (0.76%)	29 (0.56%)	0.18867	1	all-17663; all-48808; n-16505; n-33264; n-5310; n-63834; n-7887; s-16330; s-25318; s-40803
ko00410	beta-Alanine metabolism	13 (0.99%)	40 (0.78%)	0.2065	1	all-21292; all-21443; all-22058; all-26190; all-3124; all-3180; all-3235; all-39353; all-51772; all-56166; n-35990; n-63129; s-39496
ko00330	Arginine and proline metabolism	25 (1.9%)	83 (1.62%)	0.20825	1	all-10052; all-26190; all-3180; all-3235; all-379; all-39353; all-6140; all-62218; all-70760; all-7186; n-10253; n-10623; n-11562; n-24716; n-313; n-46168; n-62266; n-63437; n-64753; n-6906; n-8101; n-8854; n-9249; s-52923; s-6162
ko00071	Fatty acid metabolism	23 (1.74%)	76 (1.48%)	0.21312	1	all-14339; all-21443; all-2673; all-3124; all-3180; all-3235; all-39353; all-41627; all-50216; all-51772; all-6009; all-6721; all-68757; n-1445; n-35159; n-41720; n-47420; n-48696; n-58253; n-63377; n-63596; s-39496; s-46815
ko04080	Neuroactive ligand-receptor interaction	25 (1.9%)	84 (1.64%)	0.22813	1	all-12184; all-1426; all-3769; all-3953; all-4206; all-4586; all-55294; all-56554; n-11040; n-11881; n-19035; n-20104; n-21192; n-25007; n-26265; n-273; n-31144; n-33844; n-34155; n-3727; n-59587; n-8696; s-11577; s-19394; s-45365
ko05143	African trypanosomiasis	4 (0.3%)	10 (0.19%)	0.24021	1	all-37470; all-70576; n-62772; s-41077
ko04142	Lysosome	67 (5.08%)	242 (4.71%)	0.25456	1	all-10228; all-10435; all-10787; all-13216; all-13419; all-14069; all-17620; all-19663; all-19796; all-21992; all-22846; all-22886; all-26302; all-3352; all-4111; all-42398; all-43963; all-45608; all-4802; all-52255; all-5909; all-62750; all-6284; all-64322; all-67695; all-6949; all-70254; all-71180; all-71393; all-8022; n-11757; n-12410; n-140; n-14529; n-15614; n-15646; n-1685; n-16882; n-1713;…
ko00010	Glycolysis / Gluconeogenesis	20 (1.52%)	67 (1.3%)	0.2555	1	all-14339; all-3180; all-3235; all-34383; all-35933; all-39353; all-71222; n-12212; n-14589; n-14732; n-16921; n-24105; n-33209; n-36512; n-39065; n-42871; n-7095; s-11711; s-14294; s-27278
ko04210	Apoptosis	23 (1.74%)	78 (1.52%)	0.25611	1	all-4040; all-62739; all-70576; all-8813; n-12745; n-17252; n-28878; n-3429; n-35268; n-54175; n-5668; n-62478; n-62772; n-64141; n-65318; n-8511; s-11341; s-19561; s-23052; s-41077; s-44993; s-54856; s-5564
ko05131	Shigellosis	1 (0.08%)	1 (0.02%)	0.25686	1	n-8798
ko05217	Basal cell carcinoma	3 (0.23%)	7 (0.14%)	0.25788	1	all-11262; all-21208; n-52728
ko00785	Lipoic acid metabolism	2 (0.15%)	4 (0.08%)	0.27332	1	n-41731; s-53443
ko05016	Huntington's disease	8 (0.61%)	25 (0.49%)	0.30088	1	all-10565; all-12184; all-17662; n-53492; n-54555; n-59587; n-62478; s-12150
ko05142	Chagas disease (American trypanosomiasis)	6 (0.45%)	18 (0.35%)	0.30629	1	all-1445; all-70576; n-12039; n-62772; n-65334; s-41077
ko04110	Cell cycle	18 (1.36%)	62 (1.21%)	0.31623	1	all-10565; all-41136; all-48363; all-5586; all-70763; n-35001; n-3557; n-36522; n-4082; n-4629; n-59626; n-63251; n-63362; s-19462; s-46388; s-5140; s-53745; s-54724
ko04060	Cytokine-cytokine receptor interaction	9 (0.68%)	29 (0.56%)	0.31756	1	all-21208; all-2358; all-7105; n-35268; s-30401; s-41077; s-48648; s-52561; s-54856
ko04810	Regulation of actin cytoskeleton	13 (0.99%)	44 (0.86%)	0.33088	1	all-11267; all-13510; all-2891; all-36854; n-12514; n-17252; n-30580; n-63640; n-64426; s-19394; s-23514; s-3287; s-52739
ko04140	Regulation of autophagy	8 (0.61%)	26 (0.51%)	0.34449	1	all-42436; n-12737; n-24503; n-45085; n-6736; s-35733; s-42107; s-54282
ko00591	Linoleic acid metabolism	8 (0.61%)	26 (0.51%)	0.34449	1	all-14067; all-15101; all-19343; n-18799; n-36668; n-64471; s-40350; s-52211
ko04114	Oocyte meiosis	16 (1.21%)	56 (1.09%)	0.35784	1	all-41136; all-70763; all-7137; n-12039; n-35001; n-3557; n-4082; n-63313; n-63645; n-64426; s-14869; s-21912; s-29688; s-47256; s-53745; s-54724
ko04012	ErbB signaling pathway	6 (0.45%)	19 (0.37%)	0.35825	1	all-2891; n-17252; n-4397; n-5693; n-644; s-5859
ko04310	Wnt signaling pathway	34 (2.58%)	124 (2.41%)	0.36053	1	all-10565; all-11262; all-13041; all-2195; all-3622; all-55334; all-5643; all-5789; n-12039; n-16133; n-22616; n-34404; n-36041; n-3811; n-39928; n-41352; n-51230; n-56202; n-60414; n-636; n-65034; n-65038; n-7469; n-8033; n-8035; n-9166; s-14930; s-17632; s-25102; s-25381; s-29688; s-48735; s-582; s-6216
ko04350	TGF-beta signaling pathway	18 (1.36%)	64 (1.25%)	0.37232	1	all-10565; all-21208; all-3622; all-55320; all-5586; all-7727; n-12039; n-3191; n-36041; n-63533; n-636; n-65247; n-8033; n-8035; n-9166; s-17632; s-25102; s-6216
ko05323	Rheumatoid arthritis	2 (0.15%)	5 (0.1%)	0.38167	1	all-42452; n-19770
ko04115	p53 signaling pathway	8 (0.61%)	27 (0.53%)	0.38886	1	all-48363; n-3429; n-35001; n-36522; n-62478; n-63362; s-43305; s-46388
ko04620	Toll-like receptor signaling pathway	12 (0.91%)	42 (0.82%)	0.39028	1	all-2358; all-4040; all-46488; all-70576; n-17252; n-28878; n-4397; n-5668; n-62772; n-65318; s-23052; s-5564
ko00460	Cyanoamino acid metabolism	5 (0.38%)	16 (0.31%)	0.39459	1	all-23942; all-42037; all-63998; all-71440; n-11562
ko00480	Glutathione metabolism	21 (1.59%)	77 (1.5%)	0.41707	1	all-12884; all-23942; all-26190; all-26389; all-3125; all-42037; all-5963; all-6604; all-71805; all-9949; n-1488; n-1868; n-1884; n-3967; n-63749; n-64753; n-6750; s-1597; s-36405; s-48; s-52190
ko00980	Metabolism of xenobiotics by cytochrome P450	11 (0.83%)	39 (0.76%)	0.41848	1	all-14339; all-15101; all-19343; all-26389; all-2727; all-5963; n-18799; n-1884; n-33956; n-36668; s-40350
ko00860	Porphyrin and chlorophyll metabolism	11 (0.83%)	39 (0.76%)	0.41848	1	all-15205; all-16714; all-28699; n-13012; n-24439; n-48297; n-5545; n-58194; n-64333; s-11029; s-48293
ko00750	Vitamin B6 metabolism	3 (0.23%)	9 (0.18%)	0.41857	1	all-70957; n-17854; n-4177
ko05160	Hepatitis C	3 (0.23%)	9 (0.18%)	0.41857	1	n-12039; s-23052; s-5564
ko00603	Glycosphingolipid biosynthesis - globo series	7 (0.53%)	24 (0.47%)	0.42318	1	all-10435; all-64322; all-71180; all-71416; n-1713; s-31155; s-45587
ko00604	Glycosphingolipid biosynthesis - ganglio series	7 (0.53%)	24 (0.47%)	0.42318	1	all-4802; all-64322; all-6949; all-71180; n-1713; n-19824; s-45587
ko04144	Endocytosis	50 (3.79%)	189 (3.68%)	0.43095	1	all-13909; all-15165; all-17258; all-218; all-23374; all-23859; all-25801; all-29647; all-29899; all-3097; all-40866; all-4634; all-55320; all-58490; all-71103; n-10705; n-11582; n-12286; n-13171; n-14265; n-18484; n-2172; n-26022; n-28702; n-30205; n-31059; n-3191; n-327; n-33440; n-41671; n-48822; n-5000; n-54555; n-57428; n-63294; n-63586; n-636; n-65201; n-7289; s-10533; s-12910; s-13971; s-1…
ko01040	Biosynthesis of unsaturated fatty acids	8 (0.61%)	28 (0.55%)	0.43338	1	all-2673; all-41627; all-68757; n-1258; n-2171; n-2461; n-35159; s-39496
ko00730	Thiamine metabolism	1 (0.08%)	2 (0.04%)	0.44779	1	n-28498
ko05332	Graft-versus-host disease	1 (0.08%)	2 (0.04%)	0.44779	1	s-41077
ko05330	Allograft rejection	1 (0.08%)	2 (0.04%)	0.44779	1	s-41077
ko05320	Autoimmune thyroid disease	1 (0.08%)	2 (0.04%)	0.44779	1	s-41077
ko00640	Propanoate metabolism	16 (1.21%)	59 (1.15%)	0.44951	1	all-21443; all-3124; all-3180; all-3235; all-39353; all-51772; all-54577; all-7422; n-63129; n-7270; n-857; s-39496; s-39772; s-46562; s-46815; s-8008
ko00250	Alanine, aspartate and glutamate metabolism	17 (1.29%)	63 (1.23%)	0.45426	1	all-22058; all-452; all-55241; all-6140; all-66257; all-7267; all-7816; n-10623; n-21949; n-25458; n-313; n-50082; n-5053; n-63129; n-63437; n-8854; s-6643
ko04720	Long-term potentiation	8 (0.61%)	29 (0.56%)	0.4775	1	all-10565; all-12184; n-59587; n-63313; n-63645; s-14869; s-21912; s-47256
ko05144	Malaria	2 (0.15%)	6 (0.12%)	0.48234	1	all-70576; n-62772
ko04662	B cell receptor signaling pathway	2 (0.15%)	6 (0.12%)	0.48234	1	all-10398; all-13758
ko00970	Aminoacyl-tRNA biosynthesis	21 (1.59%)	80 (1.56%)	0.49691	1	all-1340; all-16310; all-3031; all-6934; all-9259; n-1183; n-1971; n-48297; n-50441; n-52646; n-55376; n-5545; n-63725; n-7451; n-7514; n-770; n-8384; n-9275; s-28534; s-39216; s-9507
ko00310	Lysine degradation	21 (1.59%)	80 (1.56%)	0.49691	1	all-21443; all-23125; all-3124; all-3180; all-3235; all-33106; all-39353; all-44245; all-56459; n-12283; n-2417; n-41720; n-46311; n-57816; n-59931; n-63364; n-63596; n-833; s-39496; s-46815; s-6936
ko00270	Cysteine and methionine metabolism	14 (1.06%)	53 (1.03%)	0.50421	1	all-14086; all-18044; all-26190; all-6140; all-70760; all-71616; all-944; n-1054; n-18268; n-59557; n-8854; s-51761; s-52266; s-53446
ko04010	MAPK signaling pathway	18 (1.36%)	69 (1.34%)	0.51594	1	all-10398; all-20927; all-2891; all-4040; all-46488; all-7137; n-28878; n-31059; n-36522; n-4397; n-473; n-54102; n-63362; n-644; s-41077; s-46388; s-52211; s-5859
ko03320	PPAR signaling pathway	8 (0.61%)	30 (0.58%)	0.52073	1	all-2673; all-3124; all-50216; all-51772; all-8763; n-58253; s-1041; s-25342
ko05145	Toxoplasmosis	8 (0.61%)	30 (0.58%)	0.52073	1	all-62739; all-70576; n-31059; n-62478; n-62772; n-64141; n-8511; s-52211
ko04722	Neurotrophin signaling pathway	10 (0.76%)	38 (0.74%)	0.52669	1	all-36854; all-8813; n-4397; n-63313; n-63645; n-64985; s-14869; s-21912; s-41077; s-47256
ko03440	Homologous recombination	12 (0.91%)	46 (0.9%)	0.53178	1	all-2635; all-34484; all-402; all-51690; n-36719; n-63273; s-18818; s-1944; s-38473; s-40526; s-55018; s-733
ko00240	Pyrimidine metabolism	41 (3.11%)	161 (3.14%)	0.55686	1	all-13994; all-17662; all-21292; all-32621; all-36328; all-37480; all-38701; all-44050; all-48061; all-56166; all-58372; all-5894; all-67493; all-70585; n-1040; n-10414; n-1868; n-19118; n-19162; n-19545; n-20663; n-2109; n-21949; n-25382; n-35990; n-410; n-43523; n-53492; n-63223; n-64907; n-65147; n-65248; s-2361; s-27667; s-31570; s-3923; s-41424; s-52454; s-54322; s-5739; s-733
ko04740	Olfactory transduction	6 (0.45%)	23 (0.45%)	0.56203	1	all-2223; n-63313; n-63645; s-14869; s-21912; s-47256
ko00360	Phenylalanine metabolism	7 (0.53%)	27 (0.53%)	0.56219	1	all-10714; all-6140; all-7186; n-11562; n-63428; n-8854; n-8886
ko00053	Ascorbate and aldarate metabolism	4 (0.3%)	15 (0.29%)	0.56342	1	all-3180; all-3235; all-39353; n-210
ko04710	Circadian rhythm - mammal	4 (0.3%)	15 (0.29%)	0.56342	1	all-3622; n-29101; n-48748; n-9166
ko04320	Dorso-ventral axis formation	10 (0.76%)	39 (0.76%)	0.56401	1	all-46970; all-6962; all-70548; n-28702; n-33125; n-3885; n-47331; n-63533; n-644; s-5859
ko04013	MAPK signaling pathway - fly	3 (0.23%)	11 (0.21%)	0.56603	1	n-28702; n-63232; n-63533
ko00051	Fructose and mannose metabolism	14 (1.06%)	55 (1.07%)	0.56764	1	all-34383; all-35933; all-69683; all-71118; n-1221; n-16273; n-24840; n-249; n-39065; s-11711; s-14263; s-14294; s-45780; s-4890
ko00052	Galactose metabolism	15 (1.14%)	59 (1.15%)	0.56862	1	all-11802; all-34383; all-42137; all-4802; all-48900; all-6949; n-11086; n-16273; n-19824; n-39065; s-11711; s-14294; s-31155; s-45780; s-4890
ko04978	Mineral absorption	1 (0.08%)	3 (0.06%)	0.58969	1	all-11605
ko00472	D-Arginine and D-ornithine metabolism	1 (0.08%)	3 (0.06%)	0.58969	1	all-10052
ko05020	Prion diseases	1 (0.08%)	3 (0.06%)	0.58969	1	n-65334
ko00780	Biotin metabolism	1 (0.08%)	3 (0.06%)	0.58969	1	all-1055
ko00471	D-Glutamine and D-glutamate metabolism	1 (0.08%)	3 (0.06%)	0.58969	1	n-313
ko00592	alpha-Linolenic acid metabolism	6 (0.45%)	24 (0.47%)	0.60831	1	all-14067; all-2673; all-68757; n-35159; n-64471; s-52211
ko00430	Taurine and hypotaurine metabolism	4 (0.3%)	16 (0.31%)	0.61969	1	all-22058; all-23942; all-42037; all-7538
ko00512	Mucin type O-Glycan biosynthesis	4 (0.3%)	16 (0.31%)	0.61969	1	all-6808; n-15184; n-2394; s-7552
ko00983	Drug metabolism - other enzymes	18 (1.36%)	73 (1.42%)	0.62479	1	all-11994; all-15101; all-1862; all-19343; all-21292; all-56166; all-57616; n-18799; n-34494; n-35990; n-36668; n-38648; n-39503; n-63054; n-7691; s-40350; s-41424; s-52676
ko00120	Primary bile acid biosynthesis	3 (0.23%)	12 (0.23%)	0.63053	1	all-65914; n-5713; n-64740
ko00520	Amino sugar and nucleotide sugar metabolism	28 (2.12%)	114 (2.22%)	0.64496	1	all-11802; all-14238; all-452; all-4832; all-48900; all-4957; all-58360; all-62721; all-64322; all-70183; all-71180; all-9412; n-11086; n-1713; n-2344; n-24840; n-249; n-25054; n-33209; n-63200; n-63579; n-848; s-11711; s-14294; s-25428; s-29664; s-45587; s-6232
ko04914	Progesterone-mediated oocyte maturation	26 (1.97%)	106 (2.06%)	0.64536	1	all-1645; all-1797; all-18402; all-23836; all-41136; all-48363; all-57806; all-6355; all-6962; all-7137; all-762; n-12231; n-17252; n-2144; n-35001; n-3557; n-40787; n-4082; n-47331; n-56202; n-59626; n-60975; n-63533; n-8232; s-51644; s-53745
ko05100	Bacterial invasion of epithelial cells	2 (0.15%)	8 (0.16%)	0.64998	1	n-54555; s-52739
ko05140	Leishmaniasis	2 (0.15%)	8 (0.16%)	0.64998	1	all-70576; n-62772
ko05211	Renal cell carcinoma	2 (0.15%)	8 (0.16%)	0.64998	1	all-10565; all-2891
ko04664	Fc epsilon RI signaling pathway	2 (0.15%)	8 (0.16%)	0.64998	1	n-4397; s-52211
ko04660	T cell receptor signaling pathway	2 (0.15%)	8 (0.16%)	0.64998	1	all-2891; n-4397
ko04910	Insulin signaling pathway	15 (1.14%)	62 (1.21%)	0.6543	1	all-54577; all-61400; n-16405; n-17252; n-54102; n-58640; n-60556; n-63313; n-63645; n-644; n-64426; s-14869; s-21912; s-47256; s-5859
ko04744	Phototransduction	5 (0.38%)	21 (0.41%)	0.65984	1	n-63313; n-63645; s-14869; s-21912; s-47256
ko04912	GnRH signaling pathway	11 (0.83%)	46 (0.9%)	0.66392	1	all-1445; n-4397; n-63313; n-63645; n-644; s-14869; s-14930; s-21912; s-47256; s-52211; s-5859
ko04510	Focal adhesion	21 (1.59%)	87 (1.69%)	0.67049	1	all-20927; all-2891; all-5567; all-62739; all-67766; n-12514; n-12745; n-17252; n-35326; n-54175; n-64141; n-644; n-64426; n-8511; s-11341; s-19561; s-23514; s-44993; s-45536; s-47669; s-5859
ko00601	Glycosphingolipid biosynthesis - lacto and neolacto series	4 (0.3%)	17 (0.33%)	0.67116	1	all-54970; all-71416; n-1224; n-4020
ko00350	Tyrosine metabolism	9 (0.68%)	38 (0.74%)	0.67188	1	all-10714; all-14339; all-57075; all-6140; all-62253; all-7186; all-816; n-8854; n-8886
ko00590	Arachidonic acid metabolism	13 (0.99%)	55 (1.07%)	0.6864	1	all-12884; all-14067; all-23739; all-23942; all-3104; all-42037; all-9949; n-15372; n-20279; n-22533; n-63749; n-64471; s-52211
ko04960	Aldosterone-regulated sodium reabsorption	1 (0.08%)	4 (0.08%)	0.69514	1	all-15165
ko04360	Axon guidance	2 (0.15%)	9 (0.18%)	0.71609	1	all-2891; n-14425
ko00300	Lysine biosynthesis	2 (0.15%)	9 (0.18%)	0.71609	1	all-39353; all-56459
ko00450	Selenocompound metabolism	4 (0.3%)	18 (0.35%)	0.7176	1	n-20663; n-6393; n-8384; s-20016
ko04745	Phototransduction - fly	4 (0.3%)	18 (0.35%)	0.7176	1	all-5789; n-28033; n-28516; s-181
ko04622	RIG-I-like receptor signaling pathway	7 (0.53%)	31 (0.6%)	0.71911	1	all-3536; all-4040; n-28878; n-44924; n-5668; s-23052; s-5564
ko03030	DNA replication	17 (1.29%)	73 (1.42%)	0.72351	1	all-1017; all-402; all-4434; all-68615; n-12764; n-22288; n-3128; n-3687; n-60792; n-62860; n-63223; n-63273; n-63915; n-65248; s-1247; s-5140; s-733
ko04530	Tight junction	6 (0.45%)	27 (0.53%)	0.72922	1	all-62409; all-71848; n-12039; n-24975; n-57816; s-160
ko04150	mTOR signaling pathway	15 (1.14%)	65 (1.27%)	0.73007	1	all-18402; all-5604; all-7137; all-7548; n-1399; n-17252; n-19068; n-2144; n-2243; n-41494; n-63533; n-65175; s-13084; s-35733; s-51644
ko04120	Ubiquitin mediated proteolysis	69 (5.23%)	285 (5.55%)	0.74239	1	all-11246; all-11874; all-13740; all-1473; all-15165; all-18126; all-18605; all-2195; all-23836; all-25801; all-29016; all-32617; all-3622; all-4368; all-45420; all-51839; all-54726; all-55697; all-5661; all-57806; all-57826; all-62739; all-67602; all-70433; all-71230; all-71235; all-71594; all-762; all-797; n-12231; n-12745; n-14117; n-14339; n-15737; n-17867; n-31669; n-31748; n-3191; n-33520; …
ko03420	Nucleotide excision repair	17 (1.29%)	74 (1.44%)	0.74538	1	all-15524; all-402; all-4368; all-45032; all-68615; all-71235; all-7801; n-12764; n-17694; n-22288; n-62860; n-63223; n-63273; n-65248; n-91; s-54166; s-733
ko00532	Glycosaminoglycan biosynthesis - chondroitin sulfate	4 (0.3%)	19 (0.37%)	0.759	1	all-47302; n-25288; n-5781; n-62836
ko05222	Small cell lung cancer	4 (0.3%)	19 (0.37%)	0.759	1	all-62739; n-62478; n-64141; n-8511
ko04916	Melanogenesis	8 (0.61%)	37 (0.72%)	0.77121	1	all-10565; n-60414; n-63313; n-63645; s-14869; s-14930; s-21912; s-47256
ko05014	Amyotrophic lateral sclerosis (ALS)	2 (0.15%)	10 (0.19%)	0.77136	1	all-16874; n-62478
ko04974	Protein digestion and absorption	2 (0.15%)	10 (0.19%)	0.77136	1	all-29671; all-699
ko04512	ECM-receptor interaction	21 (1.59%)	92 (1.79%)	0.77205	1	all-30304; all-32556; all-53265; all-5567; all-56142; all-62150; all-67766; n-12514; n-12631; n-2309; n-2925; n-35326; n-63369; s-16311; s-296; s-30607; s-36933; s-45536; s-47669; s-49257; s-9703
ko04973	Carbohydrate digestion and absorption	1 (0.08%)	5 (0.1%)	0.77351	1	s-52501
ko05150	Staphylococcus aureus infection	1 (0.08%)	5 (0.1%)	0.77351	1	n-65334
ko05214	Glioma	5 (0.38%)	24 (0.47%)	0.77729	1	n-63313; n-63645; s-14869; s-21912; s-47256
ko05210	Colorectal cancer	3 (0.23%)	15 (0.29%)	0.78235	1	all-11262; all-23496; n-62478
ko05200	Pathways in cancer	12 (0.91%)	55 (1.07%)	0.79007	1	all-10565; all-11262; all-21208; all-23496; all-62739; n-32706; n-52728; n-62478; n-64141; n-8511; s-1944; s-41077
ko04130	SNARE interactions in vesicular transport	6 (0.45%)	29 (0.56%)	0.79367	1	all-6404; n-1014; n-34748; s-1760; s-21100; s-39255
ko03430	Mismatch repair	10 (0.76%)	47 (0.92%)	0.80395	1	all-23496; all-402; all-49336; all-68615; n-12764; n-22288; n-62860; n-63273; s-42082; s-733
ko04146	Peroxisome	40 (3.03%)	173 (3.37%)	0.8081	1	all-10052; all-10291; all-10704; all-15837; all-16; all-22505; all-23125; all-26639; all-2673; all-3124; all-33106; all-3690; all-41627; all-6009; all-68757; all-7298; all-7816; n-1346; n-18017; n-22903; n-23727; n-2398; n-2405; n-2461; n-27946; n-35159; n-38648; n-3967; n-41301; n-50082; n-62612; n-63377; n-64261; n-64740; n-64986; n-7691; n-8874; s-31024; s-3365; s-41700
ko04971	Gastric acid secretion	5 (0.38%)	25 (0.49%)	0.80867	1	n-63313; n-63645; s-14869; s-21912; s-47256
ko00561	Glycerolipid metabolism	12 (0.91%)	56 (1.09%)	0.81107	1	all-3180; all-3235; all-39353; all-6881; n-13773; n-16273; n-22016; n-49460; n-8362; s-31155; s-45780; s-4890
ko04270	Vascular smooth muscle contraction	9 (0.68%)	43 (0.84%)	0.81229	1	all-1445; n-63313; n-63645; n-64426; s-14869; s-14930; s-21912; s-47256; s-52211
ko04975	Fat digestion and absorption	2 (0.15%)	11 (0.21%)	0.81699	1	n-8362; s-52211
ko00130	Ubiquinone and other terpenoid-quinone biosynthesis	2 (0.15%)	11 (0.21%)	0.81699	1	all-10714; n-53856
ko00982	Drug metabolism - cytochrome P450	11 (0.83%)	52 (1.01%)	0.81786	1	all-14339; all-15101; all-19343; all-26389; all-5963; all-7186; n-18799; n-1884; n-36668; n-62746; s-40350
ko04972	Pancreatic secretion	3 (0.23%)	16 (0.31%)	0.81989	1	all-29671; all-699; s-52211
ko00140	Steroid hormone biosynthesis	6 (0.45%)	30 (0.58%)	0.82115	1	all-15101; all-19343; n-18799; n-33956; n-36668; s-40350
ko04970	Salivary secretion	6 (0.45%)	30 (0.58%)	0.82115	1	all-2223; n-63313; n-63645; s-14869; s-21912; s-47256
ko00510	N-Glycan biosynthesis	17 (1.29%)	78 (1.52%)	0.82132	1	all-22241; all-26999; all-3025; all-60138; all-6673; n-1266; n-14184; n-17608; n-269; n-33013; n-49875; n-50209; n-5603; n-6001; s-11988; s-35129; s-45476
ko04920	Adipocytokine signaling pathway	4 (0.3%)	21 (0.41%)	0.82746	1	all-4040; all-8763; n-28878; s-48648
ko04612	Antigen processing and presentation	1 (0.08%)	6 (0.12%)	0.83174	1	n-31059
ko04672	Intestinal immune network for IgA production	1 (0.08%)	6 (0.12%)	0.83174	1	all-2358
ko04621	NOD-like receptor signaling pathway	9 (0.68%)	44 (0.86%)	0.83399	1	all-4040; all-62739; n-12745; n-28878; n-54175; n-64141; n-8511; s-11341; s-19561
ko00040	Pentose and glucuronate interconversions	8 (0.61%)	40 (0.78%)	0.84365	1	all-2727; all-3180; all-3235; all-48900; n-16273; s-14263; s-45780; s-4890
ko00900	Terpenoid backbone biosynthesis	3 (0.23%)	17 (0.33%)	0.85176	1	n-7684; n-8874; s-46815
ko04370	VEGF signaling pathway	3 (0.23%)	17 (0.33%)	0.85176	1	n-17252; n-3429; s-52211
ko04020	Calcium signaling pathway	14 (1.06%)	67 (1.3%)	0.85249	1	all-12184; all-1445; all-4586; all-51251; n-11881; n-3727; n-59587; n-60556; n-63313; n-63645; s-14869; s-14930; s-21912; s-47256
ko00563	Glycosylphosphatidylinositol(GPI)-anchor biosynthesis	9 (0.68%)	45 (0.88%)	0.85369	1	all-31686; all-3763; all-5560; all-71051; all-71789; n-23669; n-63924; n-7234; s-1971
ko04062	Chemokine signaling pathway	2 (0.15%)	12 (0.23%)	0.85428	1	all-2891; all-36854
ko00565	Ether lipid metabolism	7 (0.53%)	36 (0.7%)	0.85466	1	all-1221; all-14067; n-48822; n-5827; n-64471; s-1880; s-52211
ko05010	Alzheimer's disease	7 (0.53%)	36 (0.7%)	0.85466	1	n-19260; n-62478; n-63313; n-63645; s-14869; s-21912; s-47256
ko00340	Histidine metabolism	8 (0.61%)	41 (0.8%)	0.8633	1	all-16678; all-3180; all-3235; all-39353; all-62218; all-7186; all-816; n-8886
ko05213	Endometrial cancer	1 (0.08%)	7 (0.14%)	0.87501	1	all-11262
ko04610	Complement and coagulation cascades	1 (0.08%)	7 (0.14%)	0.87501	1	n-65334
ko05012	Parkinson's disease	1 (0.08%)	7 (0.14%)	0.87501	1	n-62478
ko05216	Thyroid cancer	1 (0.08%)	7 (0.14%)	0.87501	1	n-32706
ko00650	Butanoate metabolism	12 (0.91%)	60 (1.17%)	0.87964	1	all-21443; all-22058; all-3124; all-3720; all-66257; n-12212; n-13425; n-24105; n-41720; n-63129; s-39496; s-46815
ko00770	Pantothenate and CoA biosynthesis	5 (0.38%)	28 (0.55%)	0.88203	1	all-21292; all-56166; all-8276; n-35990; n-4135
ko00290	Valine, leucine and isoleucine biosynthesis	6 (0.45%)	33 (0.64%)	0.88642	1	n-12212; n-24105; n-4135; n-52646; n-63725; n-7451
ko05416	Viral myocarditis	1 (0.08%)	8 (0.16%)	0.90716	1	n-62478
ko05212	Pancreatic cancer	1 (0.08%)	8 (0.16%)	0.90716	1	s-1944
ko04666	Fc gamma R-mediated phagocytosis	2 (0.15%)	14 (0.27%)	0.90883	1	all-2891; s-52739
ko04977	Vitamin digestion and absorption	2 (0.15%)	14 (0.27%)	0.90883	1	all-70240; n-52432
ko03450	Non-homologous end-joining	4 (0.3%)	25 (0.49%)	0.91652	1	all-1414; all-31701; n-26379; n-62798
ko00072	Synthesis and degradation of ketone bodies	3 (0.23%)	20 (0.39%)	0.91963	1	all-3720; n-13425; s-46815
ko05146	Amoebiasis	2 (0.15%)	15 (0.29%)	0.92829	1	all-1445; s-6162
ko04514	Cell adhesion molecules (CAMs)	3 (0.23%)	21 (0.41%)	0.935	1	all-2358; n-1230; n-12514
ko00760	Nicotinate and nicotinamide metabolism	7 (0.53%)	42 (0.82%)	0.94179	1	all-44050; all-71582; n-14347; n-1667; n-62612; s-28774; s-560
ko00600	Sphingolipid metabolism	9 (0.68%)	52 (1.01%)	0.94467	1	all-4802; all-6949; all-71291; all-8022; n-14978; n-19824; n-64238; s-30; s-31155
ko03410	Base excision repair	15 (1.14%)	80 (1.56%)	0.94473	1	all-6483; all-68615; all-70811; all-8556; n-11990; n-12764; n-1594; n-6037; n-62860; n-63223; n-65248; n-7585; s-23027; s-53768; s-733
ko05215	Prostate cancer	1 (0.08%)	10 (0.19%)	0.94879	1	all-10565
ko00232	Caffeine metabolism	2 (0.15%)	17 (0.33%)	0.95604	1	n-38648; n-7691
ko00910	Nitrogen metabolism	5 (0.38%)	34 (0.66%)	0.95961	1	all-7267; n-20465; n-3016; n-313; s-28544
ko04380	Osteoclast differentiation	1 (0.08%)	11 (0.21%)	0.96197	1	n-4397
ko00100	Steroid biosynthesis	1 (0.08%)	11 (0.21%)	0.96197	1	n-50312
ko05410	Hypertrophic cardiomyopathy (HCM)	2 (0.15%)	18 (0.35%)	0.96572	1	all-66994; n-52419
ko00061	Fatty acid biosynthesis	3 (0.23%)	24 (0.47%)	0.96628	1	all-54577; all-61400; n-58640
ko00531	Glycosaminoglycan degradation	11 (0.83%)	66 (1.29%)	0.97113	1	all-22886; all-3299; all-3352; all-4802; all-64322; all-6949; all-71180; n-1713; n-19824; n-22059; s-45587
ko00534	Glycosaminoglycan biosynthesis - heparan sulfate	1 (0.08%)	12 (0.23%)	0.97176	1	all-70534
ko05414	Dilated cardiomyopathy	2 (0.15%)	20 (0.39%)	0.9793	1	all-66994; n-52419
ko00500	Starch and sucrose metabolism	10 (0.76%)	66 (1.29%)	0.9867	1	all-48900; all-67609; all-71030; all-71823; n-16405; n-25054; n-33209; s-11711; s-14294; s-52501
ko00514	Other types of O-glycan biosynthesis	3 (0.23%)	29 (0.56%)	0.98931	1	all-6770; n-2653; n-3514
ko04340	Hedgehog signaling pathway	7 (0.53%)	52 (1.01%)	0.98992	1	all-21208; all-5877; n-29101; n-32044; n-52728; n-56202; n-65034
ko04976	Bile secretion	1 (0.08%)	16 (0.31%)	0.99142	1	n-6105
ko00562	Inositol phosphate metabolism	14 (1.06%)	90 (1.75%)	0.99291	1	all-15211; all-22940; all-42436; all-71784; all-7422; n-11582; n-17252; n-18699; n-210; n-21277; n-2172; n-23079; n-26074; s-14930
ko00740	Riboflavin metabolism	2 (0.15%)	25 (0.49%)	0.99432	1	all-6362; n-57876
ko04070	Phosphatidylinositol signaling system	27 (2.05%)	155 (3.02%)	0.99501	1	all-10132; all-18402; all-22940; all-42436; all-47482; all-6262; all-71784; n-11582; n-13773; n-17252; n-18699; n-21277; n-2144; n-2172; n-23079; n-26074; n-28516; n-63007; n-63292; n-63313; n-63645; s-14869; s-14930; s-181; s-21912; s-47256; s-51644
ko00920	Sulfur metabolism	1 (0.08%)	19 (0.37%)	0.99649	1	s-23716
ko00230	Purine metabolism	47 (3.56%)	250 (4.87%)	0.99659	1	all-13994; all-17662; all-21641; all-36328; all-37480; all-38701; all-44050; all-4735; all-54489; all-55241; all-58372; all-5894; all-5980; all-67493; all-70375; n-10414; n-1868; n-19118; n-19545; n-2109; n-25382; n-25458; n-38474; n-38648; n-40541; n-410; n-42871; n-43523; n-43593; n-45259; n-53492; n-61830; n-63223; n-63296; n-64121; n-64907; n-65147; n-65248; n-755; n-7691; s-17551; s-31570; s…
ko00564	Glycerophospholipid metabolism	14 (1.06%)	95 (1.85%)	0.99678	1	all-14067; all-26639; all-3690; n-13773; n-1571; n-22532; n-25637; n-48822; n-64471; n-9298; n-9641; s-1880; s-52211; s-54497
ko04520	Adherens junction	1 (0.08%)	28 (0.55%)	0.99976	1	all-10565
ko03010	Ribosome	17 (1.29%)	145 (2.82%)	0.99999	1	all-1313; all-22885; all-31678; all-41319; all-50791; all-57350; all-60133; all-6596; all-71503; all-808; n-110; n-1134; n-13258; n-62958; s-1567; s-2806; s-53596
ko02010	ABC transporters	5 (0.38%)	92 (1.79%)	1	1	all-11822; all-39678; n-1687; n-27946; n-29778

## Sheet: S-specific
Pathway ID	Pathway name	Unigenes with pathway annotation in southern specific SNPs (962)	Totally unigenes with pathway annotation (5135)	p_value	corr_p_value	Unigene ID
ko00190	Oxidative phosphorylation	47 (4.89%)	104 (2.03%)	3.932e-10	8.2965e-08	all-10486; all-1361; all-14788; all-18043; all-19945; all-23085; all-26302; all-40509; all-42452; all-4691; all-58647; n-10041; n-10978; n-11978; n-12821; n-140; n-16836; n-16882; n-1789; n-18737; n-19770; n-2640; n-31661; n-3221; n-3378; n-34122; n-35428; n-43533; n-5278; n-5512; n-5720; n-6026; n-62980; n-64795; n-6510; n-7150; n-716; n-9289; n-9808; s-11409; s-14498; s-51578; s-51720; s-52130;…
ko03050	Proteasome	26 (2.7%)	44 (0.86%)	2.9189e-09	6.1589e-07	all-16391; all-17487; all-30672; all-42639; all-5992; n-10988; n-11238; n-11500; n-12907; n-1378; n-20767; n-21270; n-26708; n-29548; n-42500; n-4707; n-5026; n-62938; n-64277; n-8444; s-18764; s-32000; s-3298; s-35114; s-54407; s-7182
ko04145	Phagosome	48 (4.99%)	141 (2.75%)	8.6847e-06	0.0018325	all-1292; all-1361; all-17559; all-19383; all-20495; all-2057; all-21894; all-23859; all-26302; all-32556; all-34491; all-35395; all-40509; all-42436; all-42452; all-476; all-54587; all-58490; all-5965; all-597; all-6235; all-8484; all-9911; n-11978; n-140; n-16836; n-16882; n-18737; n-19770; n-2147; n-2696; n-28033; n-2925; n-30205; n-32433; n-33425; n-3378; n-34352; n-43878; n-51154; n-51230; n…
ko00020	Citrate cycle (TCA cycle)	21 (2.18%)	46 (0.9%)	2.5184e-05	0.0053139	all-1279; all-18043; all-47288; all-64882; all-71222; all-827; n-12212; n-12821; n-14589; n-2058; n-21238; n-24105; n-2417; n-36512; n-41148; n-63364; n-65331; n-7270; n-7489; s-11409; s-52709
ko03013	RNA transport	64 (6.65%)	228 (4.44%)	0.00028199	0.0595	all-10122; all-10509; all-16761; all-18486; all-22220; all-25136; all-25437; all-293; all-2939; all-31257; all-3322; all-37727; all-3792; all-38274; all-3977; all-47102; all-4775; all-5051; all-52321; all-58749; all-62086; all-70683; all-7409; all-8307; all-844; n-11701; n-145; n-15574; n-16246; n-17856; n-2243; n-25146; n-27022; n-27155; n-28194; n-28606; n-32706; n-3456; n-34739; n-36092; n-414…
ko03040	Spliceosome	49 (5.09%)	176 (3.43%)	0.0017311	0.36527	all-11679; all-14321; all-1584; all-1996; all-24420; all-31257; all-33361; all-5127; all-53170; all-63614; all-70752; all-7652; n-10587; n-12451; n-13279; n-14056; n-14956; n-1564; n-1590; n-15985; n-20062; n-25146; n-2551; n-27155; n-32631; n-3276; n-32785; n-3456; n-40880; n-4096; n-42508; n-43828; n-44814; n-44965; n-46420; n-48616; n-59035; n-63036; n-63371; n-64180; n-68; n-8294; n-8798; s-1…
ko00010	Glycolysis / Gluconeogenesis	22 (2.29%)	67 (1.3%)	0.0039623	0.83604	all-14339; all-3180; all-35933; all-39198; all-39353; all-40707; all-4569; all-53139; all-71222; n-12212; n-14589; n-16921; n-24105; n-3068; n-32632; n-33209; n-36512; n-42871; n-54062; n-7095; s-11711; s-27278
ko00062	Fatty acid elongation in mitochondria	7 (0.73%)	13 (0.25%)	0.0047382	0.99975	all-21443; all-22846; all-258; all-6721; n-41720; n-48696; s-39496
ko03015	mRNA surveillance pathway	33 (3.43%)	115 (2.24%)	0.0056611	1	all-2939; all-30965; all-52321; all-57634; all-8307; n-12039; n-145; n-17856; n-20434; n-20643; n-21831; n-22616; n-25146; n-27155; n-2800; n-3456; n-34739; n-47374; n-50804; n-62711; n-63371; n-63680; n-65193; n-7298; n-8049; s-10080; s-14755; s-18923; s-36122; s-51097; s-52977; s-6216; s-6609
ko00980	Metabolism of xenobiotics by cytochrome P450	14 (1.46%)	39 (0.76%)	0.0084764	1	all-14339; all-15101; all-16868; all-26389; all-58738; all-5963; all-70734; n-18799; n-1884; n-20495; n-20788; n-36668; s-40350; s-53402
ko04650	Natural killer cell mediated cytotoxicity	19 (1.98%)	60 (1.17%)	0.010939	1	all-18402; all-24551; all-2891; all-5339; all-65024; all-6962; all-7279; all-7753; all-9911; n-2229; n-22553; n-35268; n-47331; n-51230; n-6; n-63232; s-12090; s-51644; s-5859
ko00330	Arginine and proline metabolism	24 (2.49%)	83 (1.62%)	0.015294	1	all-10052; all-12156; all-28692; all-3180; all-379; all-39353; all-49052; all-53139; all-6140; all-62218; n-10253; n-11562; n-17706; n-18646; n-19911; n-313; n-6187; n-62266; n-63437; n-6906; n-8854; n-9249; s-54899; s-6162
ko04330	Notch signaling pathway	15 (1.56%)	46 (0.9%)	0.017077	1	all-10565; all-25600; all-70548; all-70693; n-16133; n-33125; n-34626; n-3514; n-3811; n-43603; n-48006; n-7388; n-8033; n-8215; s-44935
ko00480	Glutathione metabolism	22 (2.29%)	77 (1.5%)	0.022582	1	all-15826; all-16868; all-26389; all-42037; all-58738; all-5963; all-70734; all-71805; all-9949; n-1868; n-1884; n-20495; n-20788; n-6187; n-6750; s-1597; s-22830; s-32443; s-36405; s-50617; s-52190; s-52477
ko00982	Drug metabolism - cytochrome P450	16 (1.66%)	52 (1.01%)	0.024579	1	all-14339; all-15101; all-16868; all-26389; all-28692; all-58738; all-5963; all-70734; n-18799; n-1884; n-20495; n-20788; n-36668; n-62746; s-40350; s-53402
ko00410	beta-Alanine metabolism	13 (1.35%)	40 (0.78%)	0.026206	1	all-21292; all-21443; all-258; all-27001; all-3124; all-3180; all-39353; all-51772; all-53139; all-56166; n-35990; n-63129; s-39496
ko05012	Parkinson's disease	4 (0.42%)	7 (0.14%)	0.026502	1	all-58647; n-10978; n-62478; s-14498
ko05016	Huntington's disease	9 (0.94%)	25 (0.49%)	0.031699	1	all-10565; all-58647; n-10978; n-18831; n-53492; n-54555; n-59587; n-62478; s-14498
ko04966	Collecting duct acid secretion	2 (0.21%)	2 (0.04%)	0.035067	1	all-42452; n-19770
ko00071	Fatty acid metabolism	21 (2.18%)	76 (1.48%)	0.036253	1	all-14339; all-21443; all-23403; all-258; all-2673; all-26948; all-3124; all-3180; all-39353; all-51772; all-53139; all-6721; all-68757; n-18694; n-41720; n-47420; n-48696; n-63596; s-39496; s-46815; s-8861
ko00620	Pyruvate metabolism	18 (1.87%)	63 (1.23%)	0.0369	1	all-3180; all-39353; all-53139; all-677; all-71222; n-12212; n-14589; n-24105; n-36512; n-39650; n-42871; n-54062; n-62733; n-63256; n-65331; s-37126; s-46815; s-4890
ko00450	Selenocompound metabolism	7 (0.73%)	18 (0.35%)	0.03705	1	all-1183; all-1283; all-26112; all-34600; n-20663; n-6393; s-20016
ko00640	Propanoate metabolism	17 (1.77%)	59 (1.15%)	0.038766	1	all-1279; all-21443; all-258; all-27001; all-3124; all-3180; all-39353; all-40325; all-51772; all-53139; all-7422; n-41148; n-54062; n-63129; n-7270; s-39496; s-46815
ko00591	Linoleic acid metabolism	9 (0.94%)	26 (0.51%)	0.040678	1	all-14067; all-15101; all-68421; n-18799; n-36668; n-64471; s-40350; s-52211; s-53402
ko04730	Long-term depression	5 (0.52%)	13 (0.25%)	0.078396	1	all-2223; n-12039; n-22553; n-59587; s-52211
ko00260	Glycine, serine and threonine metabolism	14 (1.46%)	51 (0.99%)	0.08169	1	all-10052; all-10618; all-15222; all-16714; all-28692; all-33106; all-34600; all-39353; all-63998; all-71440; all-9279; n-17706; n-36512; s-53446
ko00280	Valine, leucine and isoleucine degradation	21 (2.18%)	83 (1.62%)	0.083579	1	all-14789; all-16855; all-21443; all-258; all-27001; all-3124; all-3180; all-39353; all-40325; all-51772; all-53139; all-6721; all-7016; all-7422; n-36512; n-4135; n-41720; n-48696; n-63129; s-39496; s-46815
ko00400	Phenylalanine, tyrosine and tryptophan biosynthesis	3 (0.31%)	6 (0.12%)	0.08383	1	all-6140; n-63428; n-8854
ko00472	D-Arginine and D-ornithine metabolism	2 (0.21%)	3 (0.06%)	0.092085	1	all-10052; n-17706
ko05215	Prostate cancer	4 (0.42%)	10 (0.19%)	0.099445	1	all-10565; all-39626; n-17108; n-28240
ko04540	Gap junction	7 (0.73%)	22 (0.43%)	0.10092	1	all-2223; all-34491; all-4586; n-22553; n-29101; n-59587; s-5859
ko00380	Tryptophan metabolism	18 (1.87%)	71 (1.38%)	0.10204	1	all-21443; all-258; all-28692; all-3124; all-3180; all-39353; all-53139; all-62218; n-11562; n-2417; n-41720; n-63596; s-20016; s-31024; s-39496; s-46815; s-53787; s-9507
ko04810	Regulation of actin cytoskeleton	12 (1.25%)	44 (0.86%)	0.10631	1	all-11267; all-2891; all-36854; all-65024; all-9911; n-12514; n-30580; n-4277; n-63640; s-19394; s-3287; s-52739
ko04310	Wnt signaling pathway	29 (3.01%)	124 (2.41%)	0.1116	1	all-10565; all-11262; all-5643; all-63888; all-7753; all-9911; n-12039; n-14568; n-16133; n-22553; n-22616; n-34404; n-36041; n-3811; n-39928; n-41352; n-41609; n-51230; n-5411; n-636; n-65034; n-7469; n-8033; n-8215; n-9166; s-25381; s-44935; s-48735; s-6216
ko00511	Other glycan degradation	13 (1.35%)	49 (0.95%)	0.11353	1	all-10998; all-45608; all-5020; all-6293; all-71180; n-1171; n-1713; n-19824; n-32; n-3757; n-48010; n-64238; s-51358
ko05217	Basal cell carcinoma	3 (0.31%)	7 (0.14%)	0.12683	1	all-11262; all-21208; n-8215
ko00590	Arachidonic acid metabolism	14 (1.46%)	55 (1.07%)	0.13452	1	all-14067; all-15826; all-23739; all-3104; all-42037; all-68421; all-9949; n-15372; n-20279; n-64471; s-22830; s-32443; s-50617; s-52211
ko04630	Jak-STAT signaling pathway	12 (1.25%)	46 (0.9%)	0.13791	1	all-10565; all-1698; all-18402; all-5643; n-36041; n-5000; n-63232; n-8033; s-30401; s-44935; s-51644; s-5859
ko00650	Butanoate metabolism	15 (1.56%)	60 (1.17%)	0.13978	1	all-16855; all-21443; all-258; all-27001; all-3124; all-3720; all-66257; n-12212; n-13425; n-1728; n-24105; n-41720; n-63129; s-39496; s-46815
ko00592	alpha-Linolenic acid metabolism	7 (0.73%)	24 (0.47%)	0.14678	1	all-14067; all-23403; all-2673; all-68421; all-68757; n-64471; s-52211
ko04620	Toll-like receptor signaling pathway	11 (1.14%)	42 (0.82%)	0.14819	1	all-2358; all-39626; all-4040; all-4279; all-46488; all-70576; all-7512; all-9911; n-5668; n-62772; n-65318
ko04960	Aldosterone-regulated sodium reabsorption	2 (0.21%)	4 (0.08%)	0.16161	1	n-17108; n-22553
ko00460	Cyanoamino acid metabolism	5 (0.52%)	16 (0.31%)	0.16502	1	all-15826; all-42037; all-63998; all-71440; n-11562
ko05100	Bacterial invasion of epithelial cells	3 (0.31%)	8 (0.16%)	0.17576	1	n-4277; n-54555; s-52739
ko05211	Renal cell carcinoma	3 (0.31%)	8 (0.16%)	0.17576	1	all-10565; all-2891; s-12271
ko00140	Steroid hormone biosynthesis	8 (0.83%)	30 (0.58%)	0.1855	1	all-15101; all-21573; n-18799; n-36668; n-50372; n-9833; s-40350; s-53402
ko04930	Type II diabetes mellitus	1 (0.1%)	1 (0.02%)	0.18734	1	all-39626
ko05131	Shigellosis	1 (0.1%)	1 (0.02%)	0.18734	1	n-8798
ko00670	One carbon pool by folate	9 (0.94%)	35 (0.68%)	0.19529	1	all-1339; all-21641; all-5980; all-63998; all-68864; all-71440; n-44875; n-7029; s-5739
ko00830	Retinol metabolism	9 (0.94%)	35 (0.68%)	0.19529	1	all-14339; all-15101; all-8410; n-18799; n-34403; n-36668; n-8362; s-40350; s-53402
ko04080	Neuroactive ligand-receptor interaction	19 (1.98%)	84 (1.64%)	0.21463	1	all-1426; all-21723; all-26844; all-30404; all-3953; all-4586; n-11881; n-19035; n-20104; n-25007; n-26265; n-31144; n-33844; n-34155; n-3727; n-59587; n-8696; s-11577; s-19394
ko05200	Pathways in cancer	13 (1.35%)	55 (1.07%)	0.21825	1	all-10565; all-11262; all-21208; all-39626; n-22553; n-28240; n-28606; n-32706; n-62478; n-8215; s-12271; s-5087; s-50940
ko00051	Fructose and mannose metabolism	13 (1.35%)	55 (1.07%)	0.21825	1	all-17613; all-35933; all-39198; all-40707; all-69683; n-1221; n-24840; n-249; n-3068; n-32632; s-11711; s-14263; s-4890
ko05160	Hepatitis C	3 (0.31%)	9 (0.18%)	0.22881	1	all-39626; all-4279; n-12039
ko00360	Phenylalanine metabolism	7 (0.73%)	27 (0.53%)	0.23015	1	all-28692; all-6140; all-66106; n-11562; n-1822; n-63428; n-8854
ko05142	Chagas disease (American trypanosomiasis)	5 (0.52%)	18 (0.35%)	0.23693	1	all-39626; all-70576; n-12039; n-33425; n-62772
ko05322	Systemic lupus erythematosus	2 (0.21%)	5 (0.1%)	0.23697	1	n-18026; s-1397
ko04260	Cardiac muscle contraction	2 (0.21%)	5 (0.1%)	0.23697	1	all-58647; s-51720
ko05323	Rheumatoid arthritis	2 (0.21%)	5 (0.1%)	0.23697	1	all-42452; n-19770
ko04666	Fc gamma R-mediated phagocytosis	4 (0.42%)	14 (0.27%)	0.25888	1	all-2891; n-22553; n-4277; s-52739
ko01040	Biosynthesis of unsaturated fatty acids	7 (0.73%)	28 (0.55%)	0.26095	1	all-23403; all-258; all-2673; all-68757; n-2171; n-2461; s-39496
ko00250	Alanine, aspartate and glutamate metabolism	14 (1.46%)	63 (1.23%)	0.28293	1	all-12156; all-27001; all-452; all-6140; all-62237; all-66257; n-20869; n-25458; n-313; n-63129; n-63437; n-8854; s-54899; s-6643
ko05143	African trypanosomiasis	3 (0.31%)	10 (0.19%)	0.28425	1	all-70576; n-22553; n-62772
ko04320	Dorso-ventral axis formation	9 (0.94%)	39 (0.76%)	0.30037	1	all-46970; all-6962; all-70548; n-28702; n-33125; n-3885; n-47331; n-48413; s-5859
ko00053	Ascorbate and aldarate metabolism	4 (0.42%)	15 (0.29%)	0.3047	1	all-3180; all-39353; all-53139; n-210
ko05144	Malaria	2 (0.21%)	6 (0.12%)	0.31354	1	all-70576; n-62772
ko04612	Antigen processing and presentation	2 (0.21%)	6 (0.12%)	0.31354	1	n-28240; n-33425
ko05223	Non-small cell lung cancer	2 (0.21%)	6 (0.12%)	0.31354	1	n-17108; n-22553
ko00072	Synthesis and degradation of ketone bodies	5 (0.52%)	20 (0.39%)	0.31555	1	all-16855; all-3720; n-13425; n-1728; s-46815
ko00730	Thiamine metabolism	1 (0.1%)	2 (0.04%)	0.33962	1	n-28498
ko00130	Ubiquinone and other terpenoid-quinone biosynthesis	3 (0.31%)	11 (0.21%)	0.34058	1	n-2035; n-53856; n-64852
ko00512	Mucin type O-Glycan biosynthesis	4 (0.42%)	16 (0.31%)	0.35126	1	n-15184; n-2394; n-36181; s-18850
ko04972	Pancreatic secretion	4 (0.42%)	16 (0.31%)	0.35126	1	all-26844; all-29671; n-22553; s-52211
ko04110	Cell cycle	13 (1.35%)	62 (1.21%)	0.37448	1	all-10565; all-41136; all-70763; n-12726; n-19342; n-25247; n-35001; n-3557; n-36522; n-4629; n-59626; s-5140; s-54724
ko00030	Pentose phosphate pathway	9 (0.94%)	42 (0.82%)	0.38636	1	all-35933; all-39198; all-40707; all-4888; all-71093; all-71805; n-33209; n-43930; n-6750
ko05213	Endometrial cancer	2 (0.21%)	7 (0.14%)	0.38823	1	all-11262; n-17108
ko05216	Thyroid cancer	2 (0.21%)	7 (0.14%)	0.38823	1	n-28606; n-32706
ko03030	DNA replication	15 (1.56%)	73 (1.42%)	0.3907	1	all-402; all-68615; all-8048; n-12764; n-25977; n-3128; n-3687; n-5087; n-60792; n-62860; n-63223; n-63273; n-63915; s-1247; s-5140
ko04115	p53 signaling pathway	6 (0.62%)	27 (0.53%)	0.39468	1	n-12726; n-35001; n-36522; n-58446; n-62478; s-52477
ko04530	Tight junction	6 (0.62%)	27 (0.53%)	0.39468	1	all-59180; all-71848; n-12039; n-22553; n-5517; s-24471
ko04962	Vasopressin-regulated water reabsorption	3 (0.31%)	12 (0.23%)	0.39655	1	all-32073; n-2147; n-64985
ko04062	Chemokine signaling pathway	3 (0.31%)	12 (0.23%)	0.39655	1	all-2891; all-36854; all-39626
ko04614	Renin-angiotensin system	3 (0.31%)	12 (0.23%)	0.39655	1	all-2933; all-45919; n-24933
ko04144	Endocytosis	37 (3.85%)	189 (3.68%)	0.411	1	all-1292; all-17258; all-1808; all-23374; all-23859; all-25801; all-40866; all-43062; all-5080; all-54587; all-58490; all-69882; all-71103; n-12286; n-14265; n-18484; n-19565; n-2172; n-28702; n-30036; n-30205; n-36667; n-41609; n-41671; n-5000; n-54555; n-63294; n-63586; n-636; n-7289; s-13971; s-18460; s-2190; s-27987; s-53795; s-54130; s-54532
ko04142	Lysosome	47 (4.89%)	242 (4.71%)	0.41621	1	all-10787; all-13419; all-14069; all-16715; all-19796; all-22846; all-26302; all-3352; all-42398; all-45608; all-6235; all-6268; all-6284; all-6293; all-70254; all-71180; all-71393; all-951; n-1171; n-12410; n-140; n-15646; n-1685; n-16882; n-1713; n-19770; n-19824; n-22858; n-24933; n-29062; n-2958; n-32; n-32433; n-3757; n-54555; n-62861; n-62980; n-64238; n-64460; n-6713; s-30; s-31155; s-3988…
ko04010	MAPK signaling pathway	14 (1.46%)	69 (1.34%)	0.41739	1	all-20927; all-2891; all-39626; all-4040; all-46488; all-53692; all-59180; all-9911; n-12726; n-22553; n-36522; n-54102; s-52211; s-5859
ko04350	TGF-beta signaling pathway	13 (1.35%)	64 (1.25%)	0.42218	1	all-10565; all-21208; all-47936; all-9431; n-12039; n-36041; n-41609; n-636; n-65247; n-8033; n-9166; s-44935; s-6216
ko00310	Lysine degradation	16 (1.66%)	80 (1.56%)	0.42992	1	all-21443; all-24345; all-258; all-3124; all-3180; all-33106; all-39353; all-53139; n-2417; n-41720; n-63364; n-63596; n-833; s-39496; s-46815; s-6936
ko05140	Leishmaniasis	2 (0.21%)	8 (0.16%)	0.45905	1	all-70576; n-62772
ko04660	T cell receptor signaling pathway	2 (0.21%)	8 (0.16%)	0.45905	1	all-2891; all-39626
ko00471	D-Glutamine and D-glutamate metabolism	1 (0.1%)	3 (0.06%)	0.46338	1	n-313
ko04670	Leukocyte transendothelial migration	1 (0.1%)	3 (0.06%)	0.46338	1	n-22553
ko04130	SNARE interactions in vesicular transport	6 (0.62%)	29 (0.56%)	0.46725	1	all-6873; n-1014; n-2696; s-1760; s-21100; s-39255
ko00603	Glycosphingolipid biosynthesis - globo series	5 (0.52%)	24 (0.47%)	0.47698	1	all-71180; all-71416; n-1171; n-1713; s-31155
ko03022	Basal transcription factors	12 (1.25%)	62 (1.21%)	0.50158	1	all-21341; all-4589; all-54229; all-61878; n-25620; n-39587; n-47161; n-53972; n-63584; s-45547; s-5324; s-53361
ko03320	PPAR signaling pathway	6 (0.62%)	30 (0.58%)	0.50269	1	all-23403; all-2673; all-3124; all-51772; n-17108; s-25342
ko05145	Toxoplasmosis	6 (0.62%)	30 (0.58%)	0.50269	1	all-39626; all-70576; n-62478; n-62772; s-50940; s-52211
ko03450	Non-homologous end-joining	5 (0.52%)	25 (0.49%)	0.51577	1	all-36921; all-63128; n-10760; n-19342; n-62798
ko00565	Ether lipid metabolism	7 (0.73%)	36 (0.7%)	0.52383	1	all-1221; all-14067; all-68421; n-36667; n-64471; s-52211; s-54888
ko03430	Mismatch repair	9 (0.94%)	47 (0.92%)	0.53015	1	all-402; all-50181; all-68615; all-8048; n-12764; n-25977; n-5087; n-62860; n-63273
ko03420	Nucleotide excision repair	14 (1.46%)	74 (1.44%)	0.53127	1	all-402; all-61878; all-68615; all-8048; n-12764; n-17694; n-25977; n-29745; n-5087; n-62860; n-63223; n-63273; n-91; s-5324
ko04141	Protein processing in endoplasmic reticulum	43 (4.47%)	230 (4.48%)	0.53404	1	all-1520; all-16468; all-18605; all-19383; all-19746; all-21118; all-30002; all-35562; all-57096; all-6341; all-66411; all-6673; n-11533; n-12029; n-14184; n-15655; n-1915; n-2080; n-262; n-27661; n-28240; n-295; n-29745; n-31748; n-33425; n-33977; n-3573; n-38421; n-38535; n-50209; n-51232; n-52116; n-5603; n-61373; n-63265; n-744; n-9166; s-11988; s-125; s-15999; s-21479; s-45476; s-51060
ko03018	RNA degradation	19 (1.98%)	102 (1.99%)	0.55196	1	all-30969; all-39236; all-439; all-4569; all-51121; all-707; n-17856; n-20555; n-32525; n-3531; n-36728; n-43828; n-46420; n-55133; n-64180; n-6945; s-27278; s-46538; s-6326
ko04140	Regulation of autophagy	5 (0.52%)	26 (0.51%)	0.55331	1	all-17870; all-42436; n-12737; n-24503; n-45085
ko00785	Lipoic acid metabolism	1 (0.1%)	4 (0.08%)	0.56397	1	s-53443
ko04512	ECM-receptor interaction	17 (1.77%)	92 (1.79%)	0.56817	1	all-28351; all-30304; all-32556; all-5567; all-62150; all-67766; n-12514; n-12631; n-2309; n-2925; n-35326; n-52588; n-63369; s-16311; s-296; s-30607; s-45536
ko00630	Glyoxylate and dicarboxylate metabolism	6 (0.62%)	32 (0.62%)	0.57076	1	all-40325; all-64882; n-2058; n-21238; n-65331; s-46815
ko00520	Amino sugar and nucleotide sugar metabolism	21 (2.18%)	114 (2.22%)	0.57318	1	all-14238; all-17613; all-32023; all-452; all-4656; all-62237; all-62721; all-70183; all-71180; all-9412; n-1171; n-1713; n-20603; n-24840; n-249; n-32632; n-33209; n-848; s-11711; s-6232; s-974
ko04514	Cell adhesion molecules (CAMs)	4 (0.42%)	21 (0.41%)	0.57331	1	all-23330; all-2358; n-1230; n-12514
ko04510	Focal adhesion	16 (1.66%)	87 (1.69%)	0.57699	1	all-20927; all-2891; all-5567; all-65024; all-67766; all-9911; n-12514; n-12745; n-17108; n-22553; n-35326; s-11341; s-19561; s-45536; s-50940; s-5859
ko03008	Ribosome biogenesis in eukaryotes	21 (2.18%)	115 (2.24%)	0.59073	1	all-30969; all-54675; all-66667; all-7257; all-7409; n-10273; n-13404; n-15908; n-214; n-28194; n-4054; n-46047; n-4782; n-63881; n-65193; n-65292; n-65397; n-7290; n-8003; s-36081; s-6767
ko00430	Taurine and hypotaurine metabolism	3 (0.31%)	16 (0.31%)	0.5999	1	all-15826; all-42037; all-8402
ko00290	Valine, leucine and isoleucine biosynthesis	6 (0.62%)	33 (0.64%)	0.60302	1	all-4417; n-12212; n-24105; n-4135; n-52646; n-63725
ko04210	Apoptosis	14 (1.46%)	78 (1.52%)	0.61718	1	all-39626; all-4040; all-4279; all-70576; all-7512; n-12745; n-35268; n-5668; n-62478; n-62772; n-65318; s-11341; s-19561; s-50940
ko00561	Glycerolipid metabolism	10 (1.04%)	56 (1.09%)	0.62133	1	all-3180; all-39353; all-53139; all-6881; n-13773; n-5164; n-53137; n-8362; s-31155; s-4890
ko00770	Pantothenate and CoA biosynthesis	5 (0.52%)	28 (0.55%)	0.62375	1	all-21292; all-56166; all-7852; n-35990; n-4135
ko00983	Drug metabolism - other enzymes	13 (1.35%)	73 (1.42%)	0.62839	1	all-15101; all-21292; all-56166; all-57616; n-18799; n-35990; n-36668; n-7691; n-8356; s-40350; s-41424; s-52676; s-53402
ko00910	Nitrogen metabolism	6 (0.62%)	34 (0.66%)	0.63392	1	all-34600; n-20465; n-3016; n-313; s-28544; s-54899
ko04380	Osteoclast differentiation	2 (0.21%)	11 (0.21%)	0.6393	1	all-39626; s-5087
ko04975	Fat digestion and absorption	2 (0.21%)	11 (0.21%)	0.6393	1	n-8362; s-52211
ko04013	MAPK signaling pathway - fly	2 (0.21%)	11 (0.21%)	0.6393	1	n-28702; n-63232
ko00100	Steroid biosynthesis	2 (0.21%)	11 (0.21%)	0.6393	1	n-50312; n-9833
ko04370	VEGF signaling pathway	3 (0.31%)	17 (0.33%)	0.6432	1	all-9911; n-22553; s-52211
ko05218	Melanoma	1 (0.1%)	5 (0.1%)	0.64572	1	s-5087
ko05221	Acute myeloid leukemia	1 (0.1%)	5 (0.1%)	0.64572	1	all-39626
ko04973	Carbohydrate digestion and absorption	1 (0.1%)	5 (0.1%)	0.64572	1	s-52501
ko04950	Maturity onset diabetes of the young	1 (0.1%)	5 (0.1%)	0.64572	1	n-48006
ko05412	Arrhythmogenic right ventricular cardiomyopathy (ARVC)	1 (0.1%)	5 (0.1%)	0.64572	1	all-38301
ko04060	Cytokine-cytokine receptor interaction	5 (0.52%)	29 (0.56%)	0.65636	1	all-21208; all-2358; n-35268; s-30401; s-48648
ko00604	Glycosphingolipid biosynthesis - ganglio series	4 (0.42%)	24 (0.47%)	0.68396	1	all-71180; n-1171; n-1713; n-19824
ko00534	Glycosaminoglycan biosynthesis - heparan sulfate	2 (0.21%)	12 (0.23%)	0.68785	1	all-70534; n-28771
ko05010	Alzheimer's disease	6 (0.62%)	36 (0.7%)	0.69126	1	all-12656; all-58647; n-10978; n-19260; n-62478; s-14498
ko05220	Chronic myeloid leukemia	1 (0.1%)	6 (0.12%)	0.71216	1	all-39626
ko04662	B cell receptor signaling pathway	1 (0.1%)	6 (0.12%)	0.71216	1	all-39626
ko04672	Intestinal immune network for IgA production	1 (0.1%)	6 (0.12%)	0.71216	1	all-2358
ko04914	Progesterone-mediated oocyte maturation	18 (1.87%)	106 (2.06%)	0.7178	1	all-1645; all-18402; all-41136; all-44358; all-6355; all-6962; n-12231; n-14568; n-25247; n-28240; n-35001; n-3557; n-47331; n-59626; n-63288; n-6441; n-8232; s-51644
ko00920	Sulfur metabolism	3 (0.31%)	19 (0.37%)	0.71953	1	all-1183; all-8744; n-50372
ko05222	Small cell lung cancer	3 (0.31%)	19 (0.37%)	0.71953	1	all-39626; n-62478; s-50940
ko04012	ErbB signaling pathway	3 (0.31%)	19 (0.37%)	0.71953	1	all-2891; n-22553; s-5859
ko00350	Tyrosine metabolism	6 (0.62%)	38 (0.74%)	0.74232	1	all-14339; all-28692; all-57075; all-6140; all-66106; n-8854
ko04621	NOD-like receptor signaling pathway	7 (0.73%)	44 (0.86%)	0.74323	1	all-39626; all-4040; n-12745; n-28240; s-11341; s-19561; s-50940
ko00970	Aminoacyl-tRNA biosynthesis	13 (1.35%)	80 (1.56%)	0.75919	1	all-1340; all-4417; all-46201; all-62483; n-1183; n-19147; n-2787; n-29975; n-48297; n-52646; n-63725; s-39216; s-9507
ko00563	Glycosylphosphatidylinositol(GPI)-anchor biosynthesis	7 (0.73%)	45 (0.88%)	0.76485	1	all-5560; all-59720; all-70362; all-71051; all-71789; n-23669; s-1971
ko04610	Complement and coagulation cascades	1 (0.1%)	7 (0.14%)	0.76615	1	all-70536
ko04977	Vitamin digestion and absorption	2 (0.21%)	14 (0.27%)	0.76877	1	all-68421; all-70240
ko03060	Protein export	4 (0.42%)	27 (0.53%)	0.77274	1	n-26747; n-38677; n-49101; s-15999
ko04920	Adipocytokine signaling pathway	3 (0.31%)	21 (0.41%)	0.78252	1	all-39626; all-4040; s-48648
ko03440	Homologous recombination	7 (0.73%)	46 (0.9%)	0.78511	1	all-2635; all-402; n-10760; n-5087; n-63273; n-7672; s-40526
ko05210	Colorectal cancer	2 (0.21%)	15 (0.29%)	0.80192	1	all-11262; n-62478
ko05146	Amoebiasis	2 (0.21%)	15 (0.29%)	0.80192	1	n-22553; s-6162
ko04710	Circadian rhythm - mammal	2 (0.21%)	15 (0.29%)	0.80192	1	n-29101; n-9166
ko00270	Cysteine and methionine metabolism	8 (0.83%)	53 (1.03%)	0.8024	1	all-1283; all-13072; all-34600; all-6140; all-8402; n-8854; s-51761; s-53446
ko00564	Glycerophospholipid metabolism	15 (1.56%)	95 (1.85%)	0.80762	1	all-14067; all-18444; all-63315; all-68421; n-13773; n-1571; n-36667; n-51632; n-5164; n-53137; n-64471; n-9298; n-9641; s-52211; s-54497
ko05416	Viral myocarditis	1 (0.1%)	8 (0.16%)	0.81002	1	n-62478
ko05212	Pancreatic cancer	1 (0.1%)	8 (0.16%)	0.81002	1	all-39626
ko04664	Fc epsilon RI signaling pathway	1 (0.1%)	8 (0.16%)	0.81002	1	s-52211
ko00510	N-Glycan biosynthesis	12 (1.25%)	78 (1.52%)	0.81742	1	all-6673; n-1266; n-14184; n-17608; n-40301; n-49875; n-50209; n-5603; n-63265; s-11988; s-45476; s-7952
ko00790	Folate biosynthesis	4 (0.42%)	29 (0.56%)	0.82016	1	all-31500; all-48808; n-33264; n-63834
ko04720	Long-term potentiation	4 (0.42%)	29 (0.56%)	0.82016	1	all-10565; all-12656; n-22553; n-59587
ko00760	Nicotinate and nicotinamide metabolism	6 (0.62%)	42 (0.82%)	0.82557	1	all-55562; all-7852; n-14347; n-53207; s-28774; s-560
ko04020	Calcium signaling pathway	10 (1.04%)	67 (1.3%)	0.83158	1	all-12656; all-21723; all-26844; all-4586; all-7936; n-11881; n-22553; n-3727; n-59587; s-26071
ko04360	Axon guidance	1 (0.1%)	9 (0.18%)	0.84566	1	all-2891
ko00300	Lysine biosynthesis	1 (0.1%)	9 (0.18%)	0.84566	1	all-39353
ko00750	Vitamin B6 metabolism	1 (0.1%)	9 (0.18%)	0.84566	1	n-17854
ko04916	Melanogenesis	5 (0.52%)	37 (0.72%)	0.84935	1	all-10565; all-12656; n-22553; n-8215; s-5087
ko03020	RNA polymerase	8 (0.83%)	56 (1.09%)	0.84948	1	all-58372; all-58395; all-67493; n-19118; n-53492; n-65147; s-52454; s-54322
ko04114	Oocyte meiosis	8 (0.83%)	56 (1.09%)	0.84948	1	all-12656; all-41136; all-70763; n-12039; n-25247; n-35001; n-3557; s-54724
ko00900	Terpenoid backbone biosynthesis	2 (0.21%)	17 (0.33%)	0.85579	1	n-31176; s-46815
ko04622	RIG-I-like receptor signaling pathway	4 (0.42%)	31 (0.6%)	0.85911	1	all-39626; all-4040; all-4279; n-5668
ko05014	Amyotrophic lateral sclerosis (ALS)	1 (0.1%)	10 (0.19%)	0.87463	1	n-62478
ko04974	Protein digestion and absorption	1 (0.1%)	10 (0.19%)	0.87463	1	all-29671
ko04745	Phototransduction - fly	2 (0.21%)	18 (0.35%)	0.87738	1	n-28033; n-28516
ko00860	Porphyrin and chlorophyll metabolism	5 (0.52%)	39 (0.76%)	0.88029	1	all-16714; n-13012; n-48297; s-19383; s-48293
ko04623	Cytosolic DNA-sensing pathway	4 (0.42%)	33 (0.64%)	0.89063	1	all-39626; all-4040; all-4279; n-65147
ko04122	Sulfur relay system	1 (0.1%)	11 (0.21%)	0.89816	1	n-28498
ko00340	Histidine metabolism	5 (0.52%)	41 (0.8%)	0.90564	1	all-28692; all-3180; all-39353; all-53139; all-62218
ko00120	Primary bile acid biosynthesis	1 (0.1%)	12 (0.23%)	0.91728	1	n-64740
ko04070	Phosphatidylinositol signaling system	23 (2.39%)	155 (3.02%)	0.91735	1	all-12656; all-15903; all-18402; all-39493; all-42436; all-6262; all-71552; all-7516; all-7936; n-12525; n-13773; n-15042; n-2172; n-22553; n-25993; n-28516; n-37457; n-4206; n-49339; n-5164; n-63007; n-63292; s-51644
ko00240	Pyrimidine metabolism	24 (2.49%)	161 (3.14%)	0.91737	1	all-21292; all-38424; all-56166; all-58372; all-58395; all-67493; n-1040; n-12253; n-1868; n-19118; n-19162; n-20663; n-35990; n-53492; n-63223; n-65147; n-8356; s-27667; s-31570; s-41424; s-52454; s-52477; s-54322; s-5739
ko00514	Other types of O-glycan biosynthesis	3 (0.31%)	29 (0.56%)	0.92916	1	all-6770; n-3514; s-3505
ko00562	Inositol phosphate metabolism	12 (1.25%)	90 (1.75%)	0.93315	1	all-15903; all-39493; all-42436; all-71552; all-7422; all-7516; all-7936; n-15042; n-210; n-2172; n-3068; n-49339
ko04970	Salivary secretion	3 (0.31%)	30 (0.58%)	0.939	1	all-12656; all-2223; n-22553
ko04150	mTOR signaling pathway	8 (0.83%)	65 (1.27%)	0.93925	1	all-18402; n-1399; n-17108; n-2243; n-41494; n-65175; s-24034; s-51644
ko00600	Sphingolipid metabolism	6 (0.62%)	52 (1.01%)	0.94281	1	all-19116; all-71291; n-19824; n-64238; s-30; s-31155
ko00052	Galactose metabolism	7 (0.73%)	59 (1.15%)	0.94388	1	all-42137; all-6268; n-19824; n-32632; s-11711; s-31155; s-4890
ko04722	Neurotrophin signaling pathway	4 (0.42%)	38 (0.74%)	0.94389	1	all-12656; all-36854; all-39626; n-64985
ko00500	Starch and sucrose metabolism	8 (0.83%)	66 (1.29%)	0.94549	1	all-6268; all-7852; n-16405; n-32632; n-33209; n-3441; s-11711; s-52501
ko04740	Olfactory transduction	2 (0.21%)	23 (0.45%)	0.94699	1	all-12656; all-2223
ko05214	Glioma	2 (0.21%)	24 (0.47%)	0.95538	1	all-12656; n-22553
ko00040	Pentose and glucuronate interconversions	4 (0.42%)	40 (0.78%)	0.95756	1	all-3180; all-53139; s-14263; s-4890
ko00230	Purine metabolism	37 (3.85%)	250 (4.87%)	0.96015	1	all-10826; all-1183; all-14748; all-21641; all-2646; all-38035; all-42333; all-58372; all-58395; all-5980; all-67493; all-70375; all-71107; all-7852; n-12253; n-1868; n-19118; n-20869; n-25458; n-40541; n-42871; n-43593; n-45259; n-53492; n-60755; n-61830; n-63223; n-63296; n-65147; n-755; n-7691; s-17551; s-31570; s-52454; s-52477; s-54322; s-6643
ko04910	Insulin signaling pathway	7 (0.73%)	62 (1.21%)	0.96039	1	all-12656; all-39626; n-16405; n-17108; n-54102; n-58640; s-5859
ko04971	Gastric acid secretion	2 (0.21%)	25 (0.49%)	0.96249	1	all-12656; n-22553
ko00740	Riboflavin metabolism	2 (0.21%)	25 (0.49%)	0.96249	1	all-6362; all-7852
ko00601	Glycosphingolipid biosynthesis - lacto and neolacto series	1 (0.1%)	17 (0.33%)	0.97077	1	all-71416
ko00232	Caffeine metabolism	1 (0.1%)	17 (0.33%)	0.97077	1	n-7691
ko03410	Base excision repair	9 (0.94%)	80 (1.56%)	0.97556	1	all-617; all-68615; all-8556; n-12764; n-33074; n-6037; n-62860; n-63223; n-7585
ko05410	Hypertrophic cardiomyopathy (HCM)	1 (0.1%)	18 (0.35%)	0.97627	1	all-38301
ko04340	Hedgehog signaling pathway	5 (0.52%)	52 (1.01%)	0.97738	1	all-21208; n-14568; n-29101; n-32044; n-65034
ko04520	Adherens junction	2 (0.21%)	28 (0.55%)	0.97787	1	all-10565; all-9911
ko00532	Glycosaminoglycan biosynthesis - chondroitin sulfate	1 (0.1%)	19 (0.37%)	0.98073	1	n-62836
ko05414	Dilated cardiomyopathy	1 (0.1%)	20 (0.39%)	0.98435	1	all-38301
ko03010	Ribosome	18 (1.87%)	145 (2.82%)	0.98517	1	all-1313; all-33588; all-38431; all-41319; all-705; n-13258; n-2446; n-32434; n-4175; n-4378; n-62958; n-62969; n-64501; n-8077; s-52233; s-53792; s-55144; s-6651
ko04744	Phototransduction	1 (0.1%)	21 (0.41%)	0.9873	1	all-12656
ko00531	Glycosaminoglycan degradation	6 (0.62%)	66 (1.29%)	0.99067	1	all-3352; all-71180; n-1171; n-1713; n-19824; n-22858
ko04270	Vascular smooth muscle contraction	3 (0.31%)	43 (0.84%)	0.99231	1	all-12656; n-22553; s-52211
ko00061	Fatty acid biosynthesis	1 (0.1%)	24 (0.47%)	0.9932	1	n-58640
ko04146	Peroxisome	21 (2.18%)	173 (3.37%)	0.99324	1	all-10052; all-10291; all-22505; all-23403; all-2673; all-26948; all-3124; all-33106; all-68757; all-7298; all-7632; n-17706; n-18017; n-18694; n-20538; n-23727; n-2461; n-41301; n-64740; n-7691; s-31024
ko04912	GnRH signaling pathway	3 (0.31%)	46 (0.9%)	0.99535	1	all-12656; s-52211; s-5859
ko04120	Ubiquitin mediated proteolysis	31 (3.22%)	285 (5.55%)	0.99993	1	all-18605; all-25801; all-25854; all-26007; all-28997; all-33823; all-51839; all-55697; all-67602; all-70433; all-797; n-12231; n-12745; n-17867; n-31239; n-31669; n-31748; n-3557; n-59626; n-63280; n-744; n-91; n-9166; s-11341; s-12926; s-13971; s-19561; s-32356; s-3284; s-3449; s-50940
ko02010	ABC transporters	4 (0.42%)	92 (1.79%)	0.99999	1	all-40829; all-42099; n-6660; n-735
