# Supplementary material for: SNP Identification by Transcriptome Sequencing and Candidate Gene-Based Association Analysis for Heat Tolerance in the Bay Scallop Argopecten irradians
Source: PLoS One. 2014 Aug 14;9(8):e104960. doi: 10.1371/journal.pone.0104960 (PMC4133247; doi:10.1371/journal.pone.0104960)
Supplement: Table S10 — GO enrichment analysis information of subspecies-specific SNPs. (XLSX) [file pone.0104960.s013.xlsx]

## Sheet: N-specific
Gene Ontology term	Unigenes with GO annotation in northern specific SNPs (962)	Totally unigenes with GO annotation (5135)	Corrected P-value	Unigene ID
Molecular Function: protein binding view genes	402 out of 2566 15.67%	1465 out of 11955 12.25%	3.51e-06	all-12934, n-26411, n-59626, n-36, n-14047, s-5232, all-2817, all-70576, all-4368, all-8513, n-7135, n-58041, all-31687, n-63001, all-37480, s-7319, all-17038, all-44192, all-1797, all-70534, n-4407, all-67190, n-38656, all-13909, n-64814, all-16043, n-1230, n-1557, all-36854, n-25146, all-13270, n-63371, n-54555, all-71143, all-10919, n-19545, all-60284, all-71103, all-50077, all-40371, s-6580, …
Molecular Function: endopeptidase activity view genes	17 out of 2566 0.66%	28 out of 11955 0.23%	0.00673	s-14563, n-3811, s-39886, s-18764, n-8444, n-29548, all-30672, n-11500, all-5992, all-43963, n-1378, all-17620, n-11632, n-42500, n-3299, n-43603, all-65441
Molecular Function: proton-transporting ATPase activity, rotational mechanism view genes	10 out of 2566 0.39%	12 out of 11955 0.10%	0.00775	n-11978, n-140, n-19770, all-26302, all-1361, all-42452, all-40509, n-16836, n-14529, n-18737
Molecular Function: ubiquitin protein ligase binding view genes	29 out of 2566 1.13%	63 out of 11955 0.53%	0.0102	n-15737, all-3622, all-18126, n-17867, s-24805, s-8985, s-32000, s-16866, n-13896, all-18209, n-14339, n-60063, all-51839, s-10864, n-744, all-23836, n-31669, all-4368, all-16391, n-31748, n-20454, n-12907, n-8659, all-13123, n-1378, all-1938, n-8641, n-8371, all-71594
Molecular Function: steroid dehydrogenase activity, acting on the CH-OH group of donors, NAD or NADP as acceptor view genes	22 out of 2566 0.86%	43 out of 11955 0.36%	0.0147	all-22505, all-56038, n-3166, all-28156, n-2201, all-10352, n-53331, s-3488, n-5493, s-1168, all-21802, all-6568, n-2461, n-13425, n-64740, n-1346, n-64986, all-3720, n-26439, n-64392, s-14309, all-5840
Molecular Function: G-protein coupled receptor binding view genes	8 out of 2566 0.31%	10 out of 11955 0.08%	0.117	all-246, all-6355, n-8232, all-1645, all-7255, all-1445, all-70856, n-1239
Molecular Function: unfolded protein binding view genes	23 out of 2566 0.90%	54 out of 11955 0.45%	0.336	n-5874, n-19107, all-19383, all-12934, all-2732, n-6924, n-7828, all-3142, n-11711, n-1915, n-766, n-52706, n-31059, all-56104, n-25112, n-1091, all-29899, n-8188, s-46538, n-11030, n-1624, n-20388, n-45556
Molecular Function: threonine-type endopeptidase activity view genes	9 out of 2566 0.35%	14 out of 11955 0.12%	0.584	s-14563, n-11238, s-18764, s-54407, n-7746, n-4707, n-3299, n-64277, all-5992
Molecular Function: NADH dehydrogenase (ubiquinone) activity view genes	8 out of 2566 0.31%	12 out of 11955 0.10%	0.843	n-4656, all-19945, all-10486, all-2002, all-14788, n-5720, n-6026, s-51365
Molecular Function: G-protein beta/gamma-subunit complex binding view genes	8 out of 2566 0.31%	12 out of 11955 0.10%	0.843	all-246, all-6355, n-8232, all-1645, all-7255, all-1445, all-70856, n-1239
Molecular Function: mRNA binding view genes	22 out of 2566 0.86%	54 out of 11955 0.45%	0.923	n-36569, s-36122, n-9818, n-5155, n-13404, all-10740, n-47580, all-37148, n-16246, s-8241, n-3329, all-63614, n-35505, s-14755, n-60534, n-47116, n-20434, s-11690, n-29122, n-63884, n-18517, s-51059
Molecular Function: transcription regulatory region DNA binding view genes	7 out of 2566 0.27%	10 out of 11955 0.08%	1	n-60736, s-53076, n-27290, s-25381, s-3842, n-64520, all-65054
Molecular Function: G-protein coupled amine receptor activity view genes	12 out of 2566 0.47%	24 out of 11955 0.20%	1	n-63736, all-4206, s-14552, n-64531, s-11577, all-13524, n-10389, n-64283, n-25007, all-56762, n-3727, all-55855
Molecular Function: peptidase activity, acting on L-amino acid peptides view genes	17 out of 2566 0.66%	40 out of 11955 0.33%	1	n-6293, all-155, n-64651, n-64845, all-5256, n-43295, n-12410, all-5489, n-25260, all-64054, all-35029, all-4814, n-36943, n-64810, n-63281, all-65383, all-19796
Molecular Function: substrate-specific transmembrane transporter activity view genes	9 out of 2566 0.35%	17 out of 11955 0.14%	1	all-49083, all-7656, s-763, all-3462, all-50039, n-58930, n-466, all-2045, all-42089
Molecular Function: transcription coactivator activity view genes	12 out of 2566 0.47%	26 out of 11955 0.22%	1	n-35615, s-51467, n-4574, n-13312, all-63068, n-50, n-39216, all-71373, n-59272, s-27830, n-39928, n-251
Molecular Function: histone acetyltransferase activity view genes	23 out of 2566 0.90%	63 out of 11955 0.53%	1	all-1757, n-3855, all-70377, all-3658, n-59626, n-10830, all-44245, n-625, n-65038, s-52229, n-58313, all-48064, all-979, all-2935, n-1943, all-21878, s-6291, n-44572, n-40204, n-56697, n-36041, all-14321, n-63933
Molecular Function: translation initiation factor activity view genes	18 out of 2566 0.70%	46 out of 11955 0.38%	1	n-63584, n-25620, s-2448, n-41494, n-62880, n-16246, all-54229, s-22496, n-39587, n-25146, n-2243, n-5080, n-65171, n-988, n-36092, s-43699, all-14454, n-38656
Molecular Function: ATPase activity, coupled view genes	18 out of 2566 0.70%	46 out of 11955 0.38%	1	all-7599, n-10750, all-5871, all-34592, all-9072, n-51921, n-64076, n-54618, n-24045, all-1221, n-48687, n-1915, all-2327, all-56104, all-46945, all-25346, n-20388, s-53394
Molecular Function: protein heterodimerization activity view genes	31 out of 2566 1.21%	94 out of 11955 0.79%	1	n-63584, s-1397, n-44317, n-25620, all-71373, all-3658, s-5232, all-1651, all-35770, all-4735, n-21997, n-46607, n-53972, s-53787, n-63223, n-39216, n-60736, all-7727, s-54724, n-7512, n-4574, all-3135, s-15951, n-50, s-11690, s-573, n-5430, all-70763, n-36041, all-8763, n-13414
Molecular Function: hydrolase activity, acting on acid anhydrides, in phosphorus-containing anhydrides view genes	5 out of 2566 0.19%	7 out of 11955 0.06%	1	n-46306, all-20305, s-6241, all-13503, all-6156
Molecular Function: disulfide oxidoreductase activity view genes	5 out of 2566 0.19%	7 out of 11955 0.06%	1	n-6577, s-125, n-3179, s-5767, n-20663
Molecular Function: structural molecule activity view genes	30 out of 2566 1.17%	92 out of 11955 0.77%	1	all-48457, s-52108, n-20104, all-2145, s-1782, n-32876, n-2054, all-4539, all-30304, n-54555, all-548, s-45536, all-30740, s-52817, s-296, n-45371, n-20380, n-537, all-70345, s-10364, s-30607, all-11087, all-41322, n-12392, n-7469, all-23397, n-1614, all-763, all-42561, all-70292
Molecular Function: dynein intermediate chain binding view genes	4 out of 2566 0.16%	5 out of 11955 0.04%	1	n-64076, s-53394, n-10750, n-35466
Molecular Function: fatty acid binding view genes	4 out of 2566 0.16%	5 out of 11955 0.04%	1	s-711, n-32198, s-25342, all-4582
Molecular Function: isocitrate dehydrogenase (NAD+) activity view genes	3 out of 2566 0.12%	3 out of 11955 0.03%	1	s-52709, n-7489, n-30277
Molecular Function: superoxide dismutase activity view genes	3 out of 2566 0.12%	3 out of 11955 0.03%	1	all-16, all-14638, n-23727
Molecular Function: poly-pyrimidine tract binding view genes	3 out of 2566 0.12%	3 out of 11955 0.03%	1	s-52911, all-63614, s-11690
Molecular Function: sevenless binding view genes	7 out of 2566 0.27%	13 out of 11955 0.11%	1	s-5859, n-27000, all-5323, n-644, all-2975, all-4039, n-5000
Molecular Function: ATP-dependent helicase activity view genes	38 out of 2566 1.48%	125 out of 11955 1.05%	1	all-31942, all-51976, all-707, all-36262, all-54279, all-71047, all-34484, all-13503, s-14089, all-6171, n-25146, all-24966, n-63371, n-42508, n-28907, all-71143, all-23124, n-32631, n-2321, n-3316, all-18080, n-102, all-53108, n-18383, all-60953, n-62845, all-3528, n-54513, s-6241, n-2476, n-40184, n-48974, all-71465, n-44136, n-3028, all-25485, n-4012, n-38656
Molecular Function: ligand-activated sequence-specific DNA binding RNA polymerase II transcription factor activity view genes	9 out of 2566 0.35%	20 out of 11955 0.17%	1	all-60063, s-51939, all-3135, n-63001, n-51008, all-1651, all-3847, n-13414, n-54618
Molecular Function: enzyme regulator activity view genes	7 out of 2566 0.27%	14 out of 11955 0.12%	1	s-7380, s-52510, n-26708, all-14638, all-30672, all-1221, n-11500
Molecular Function: RNA polymerase II core promoter sequence-specific DNA binding transcription factor activity involved in preinitiation complex assembly view genes	7 out of 2566 0.27%	14 out of 11955 0.12%	1	all-54229, all-1654, n-25620, all-4995, n-53972, n-53660, all-3658
Molecular Function: Hsp70 protein binding view genes	4 out of 2566 0.16%	6 out of 11955 0.05%	1	n-48735, s-52197, n-26872, all-1678
Molecular Function: gap junction hemi-channel activity view genes	4 out of 2566 0.16%	6 out of 11955 0.05%	1	n-64413, n-11, all-59975, n-29092
Molecular Function: SUMO ligase activity view genes	4 out of 2566 0.16%	6 out of 11955 0.05%	1	s-16866, s-10864, n-8659, s-24805
Molecular Function: protein kinase C inhibitor activity view genes	4 out of 2566 0.16%	6 out of 11955 0.05%	1	s-573, s-54724, n-46607, all-70763
Molecular Function: aconitate hydratase activity view genes	4 out of 2566 0.16%	6 out of 11955 0.05%	1	n-21238, all-5065, n-12649, all-64882
Molecular Function: Hsp90 protein binding view genes	4 out of 2566 0.16%	6 out of 11955 0.05%	1	n-48735, s-52197, n-26872, all-1678
Molecular Function: phosphatidylserine binding view genes	4 out of 2566 0.16%	6 out of 11955 0.05%	1	s-2408, all-5206, all-71254, s-15029
Molecular Function: GTP binding view genes	70 out of 2566 2.73%	262 out of 11955 2.19%	1	n-51230, all-1645, s-2190, all-8392, all-37768, n-46878, all-71230, all-34491, s-30413, n-26747, all-7702, n-6431, n-47331, all-18209, n-18665, s-41507, all-32647, n-63501, s-6767, all-4709, s-22312, s-4038, n-3573, n-10088, s-40872, s-2466, all-5339, n-7222, n-8232, n-636, all-15070, n-683, n-62860, all-33665, n-1239, n-45807, n-8506, n-11796, n-7289, n-8809, s-28047, s-43699, all-45623, all-715…
Molecular Function: iron-sulfur cluster binding view genes	18 out of 2566 0.70%	53 out of 11955 0.44%	1	all-55241, n-7766, n-9530, all-1757, n-38648, n-6026, all-59313, n-7691, all-11046, all-2390, all-7267, all-20003, n-1614, all-1991, n-35931, all-21292, n-102, n-34863
Molecular Function: neurotransmitter transporter activity view genes	11 out of 2566 0.43%	28 out of 11955 0.23%	1	all-3139, n-2829, all-55589, all-175, n-698, all-837, all-17867, n-11063, all-58407, all-1922, all-15651
Molecular Function: heat shock protein binding view genes	7 out of 2566 0.27%	15 out of 11955 0.13%	1	s-16866, all-785, all-12934, all-2732, n-15699, n-28631, s-21479
Molecular Function: RNA polymerase II transcription factor binding view genes	7 out of 2566 0.27%	15 out of 11955 0.13%	1	s-16866, s-10864, n-8659, s-24805, all-51606, all-63068, all-14542
Molecular Function: mRNA 5'-UTR binding view genes	5 out of 2566 0.19%	9 out of 11955 0.08%	1	n-8294, n-20434, all-2027, n-24717, n-18788
Molecular Function: protein homodimerization activity view genes	28 out of 2566 1.09%	92 out of 11955 0.77%	1	n-10750, n-25620, n-64076, all-1651, all-35770, s-30413, n-11796, s-31583, n-16405, n-64740, n-46607, s-53394, s-54497, n-35466, all-16, n-46081, all-5339, all-5581, all-3135, n-313, all-2891, n-13633, s-573, n-5430, n-40204, all-8763, n-13414, s-27009
Molecular Function: endopeptidase inhibitor activity view genes	3 out of 2566 0.12%	4 out of 11955 0.03%	1	n-40861, all-28918, all-6992
Molecular Function: dolichyl-diphosphooligosaccharide-protein glycotransferase activity view genes	3 out of 2566 0.12%	4 out of 11955 0.03%	1	s-11988, all-6673, n-14184
Molecular Function: methylcrotonoyl-CoA carboxylase activity view genes	3 out of 2566 0.12%	4 out of 11955 0.03%	1	s-29282, all-5365, all-7016
Molecular Function: heterocyclic compound binding view genes	98 out of 2566 3.82%	386 out of 11955 3.23%	1	n-1971, all-16684, all-793, all-42886, s-52234, n-766, all-46945, s-12624, n-3276, all-708, s-5170, n-7514, all-37480, all-8817, n-7691, all-12298, n-36384, s-10864, all-58372, all-68777, s-5140, n-3028, s-19362, n-9828, all-70277, all-3903, n-8659, n-12219, all-71594, n-40880, all-707, n-41312, all-71047, all-24966, n-744, all-32500, all-1991, n-6613, all-2634, s-53591, all-53108, all-18634, n-8…
Molecular Function: endonuclease activity view genes	8 out of 2566 0.31%	19 out of 11955 0.16%	1	all-8556, all-5909, n-11592, n-3128, n-7585, s-54212, s-15999, n-6230
Molecular Function: actin filament binding view genes	8 out of 2566 0.31%	19 out of 11955 0.16%	1	s-2408, all-36507, all-5206, n-8553, all-29210, all-8572, n-63771, s-15029
Molecular Function: RNA polymerase II core promoter proximal region sequence-specific DNA binding transcription factor activity involved in negative regulation of transcription view genes	8 out of 2566 0.31%	19 out of 11955 0.16%	1	s-51939, all-3135, s-53787, all-5581, n-5430, all-1651, all-3847, n-13414
Molecular Function: G-protein coupled receptor activity view genes	18 out of 2566 0.70%	55 out of 11955 0.46%	1	n-63646, s-52770, all-5390, n-6943, n-63697, all-11205, n-31144, all-2887, n-7323, n-64531, n-46856, n-29239, n-64850, n-25541, all-55294, n-273, n-32422, n-31409
Molecular Function: NAD binding view genes	12 out of 2566 0.47%	33 out of 11955 0.28%	1	n-16133, all-10486, s-54497, s-52709, all-341, n-7489, n-30277, n-313, all-14788, n-3967, all-6483, n-62733
Molecular Function: monooxygenase activity view genes	28 out of 2566 1.09%	94 out of 11955 0.79%	1	n-20704, n-44317, all-273, all-65914, s-6959, all-23312, n-19676, all-21042, all-36951, n-820, all-40846, s-7321, all-17965, s-29805, n-64025, n-20246, n-64844, s-7097, all-71775, n-4376, all-62253, n-33571, n-1025, n-9475, n-25650, n-33956, all-70763, all-2848
Molecular Function: organic cyclic compound binding view genes	98 out of 2566 3.82%	387 out of 11955 3.24%	1	n-1971, all-16684, all-793, all-42886, s-52234, n-766, all-46945, s-12624, n-3276, all-708, s-5170, n-7514, all-37480, all-8817, n-7691, all-12298, n-36384, s-10864, all-58372, all-68777, s-5140, n-3028, s-19362, n-9828, all-70277, all-3903, n-8659, n-12219, all-71594, n-40880, all-707, n-41312, all-71047, all-24966, n-744, all-32500, all-1991, n-6613, all-2634, s-53591, all-53108, all-18634, n-8…
Molecular Function: myosin heavy chain kinase activity view genes	7 out of 2566 0.27%	16 out of 11955 0.13%	1	s-696, n-63328, n-20104, all-64659, all-14321, all-41318, all-548
Molecular Function: peptidase activity view genes	44 out of 2566 1.71%	160 out of 11955 1.34%	1	all-52255, s-44993, s-32000, n-13896, all-64987, s-48, n-64345, all-19506, n-28109, all-11005, s-9877, all-10602, all-70415, n-1513, s-44488, n-50925, all-5624, all-29671, all-62750, all-1938, all-11796, n-6589, n-12152, n-12907, all-10919, n-24758, n-3811, n-11482, n-22533, all-5823, n-33983, n-32433, n-4433, n-64845, n-2150, n-27298, all-35029, n-17527, n-54355, all-16391, s-27176, all-55596, n…
Molecular Function: cysteine desulfurase activity view genes	2 out of 2566 0.08%	2 out of 11955 0.02%	1	all-6792, n-28498
Molecular Function: inositol hexakisphosphate 5-kinase activity view genes	2 out of 2566 0.08%	2 out of 11955 0.02%	1	n-51182, s-33871
Molecular Function: thymidylate synthase activity view genes	2 out of 2566 0.08%	2 out of 11955 0.02%	1	all-70867, s-5739
Molecular Function: diphosphoinositol-pentakisphosphate kinase activity view genes	2 out of 2566 0.08%	2 out of 11955 0.02%	1	n-51182, s-33871
Molecular Function: glycine C-acetyltransferase activity view genes	2 out of 2566 0.08%	2 out of 11955 0.02%	1	n-7389, all-24783
Molecular Function: RNA polymerase II core promoter sequence-specific DNA binding transcription factor activity view genes	2 out of 2566 0.08%	2 out of 11955 0.02%	1	n-21997, n-60736
Molecular Function: cystathionine gamma-lyase activity view genes	2 out of 2566 0.08%	2 out of 11955 0.02%	1	all-6792, n-28498
Molecular Function: dihydroorotate oxidase activity view genes	2 out of 2566 0.08%	2 out of 11955 0.02%	1	n-1040, all-21292
Molecular Function: RNA polymerase II repressing transcription factor binding view genes	2 out of 2566 0.08%	2 out of 11955 0.02%	1	n-21997, n-60736
Molecular Function: cytochrome-b5 reductase activity, acting on NAD(P)H view genes	2 out of 2566 0.08%	2 out of 11955 0.02%	1	all-9412, all-38490
Molecular Function: alpha-amylase activity view genes	2 out of 2566 0.08%	2 out of 11955 0.02%	1	s-52501, all-35765
Molecular Function: 1-phosphatidylinositol binding view genes	2 out of 2566 0.08%	2 out of 11955 0.02%	1	all-71254, n-11215
Molecular Function: ubiquitin-ubiquitin ligase activity view genes	2 out of 2566 0.08%	2 out of 11955 0.02%	1	n-14339, all-18605
Molecular Function: inositol-1,3,4,5,6-pentakisphosphate kinase activity view genes	2 out of 2566 0.08%	2 out of 11955 0.02%	1	n-51182, s-33871
Molecular Function: snRNA binding view genes	2 out of 2566 0.08%	2 out of 11955 0.02%	1	all-51606, n-60534
Molecular Function: phenylalanine-tRNA ligase activity view genes	2 out of 2566 0.08%	2 out of 11955 0.02%	1	n-50441, n-1971
Molecular Function: tryptophan hydroxylase activator activity view genes	2 out of 2566 0.08%	2 out of 11955 0.02%	1	s-573, n-46607
Molecular Function: lactoylglutathione lyase activity view genes	2 out of 2566 0.08%	2 out of 11955 0.02%	1	n-63256, all-10714
Molecular Function: eukaryotic initiation factor 4G binding view genes	2 out of 2566 0.08%	2 out of 11955 0.02%	1	n-41494, n-2243
Molecular Function: GTPase activity view genes	49 out of 2566 1.91%	185 out of 11955 1.55%	1	n-51230, all-66667, all-1645, s-2190, all-8392, n-1239, n-45807, n-8506, n-46878, all-71230, all-34491, n-26747, s-28047, n-8809, n-7289, all-7702, s-43699, n-6431, n-3855, n-47331, all-18209, all-71566, all-18327, n-65155, all-6355, all-14454, all-32647, n-8371, s-6767, all-4709, s-4038, all-1445, s-9342, all-7255, s-2466, n-8888, all-246, n-7222, n-21995, n-8232, n-636, n-60063, all-70856, all-…
Molecular Function: phosphatidylinositol binding view genes	8 out of 2566 0.31%	21 out of 11955 0.18%	1	s-51690, all-61406, n-38437, all-14494, s-34941, all-3097, s-10945, n-48822
Molecular Function: SAM domain binding view genes	5 out of 2566 0.19%	11 out of 11955 0.09%	1	s-16866, s-10864, n-8659, s-24805, all-63463
Molecular Function: retinal dehydrogenase activity view genes	3 out of 2566 0.12%	5 out of 11955 0.04%	1	all-3235, all-8410, s-16548
Molecular Function: nucleosome binding view genes	3 out of 2566 0.12%	5 out of 11955 0.04%	1	n-8819, n-40204, n-36316
Molecular Function: kinase binding view genes	3 out of 2566 0.12%	5 out of 11955 0.04%	1	n-63944, s-25381, n-636
Molecular Function: thioredoxin-disulfide reductase activity view genes	3 out of 2566 0.12%	5 out of 11955 0.04%	1	n-6775, all-6604, n-20663
Molecular Function: TBP-class protein binding view genes	3 out of 2566 0.12%	5 out of 11955 0.04%	1	n-39928, n-39587, n-14277
Molecular Function: lysophosphatidic acid acyltransferase activity view genes	4 out of 2566 0.16%	8 out of 11955 0.07%	1	all-5206, all-4039, n-27000, n-30580
Molecular Function: aldehyde dehydrogenase (NAD) activity view genes	4 out of 2566 0.16%	8 out of 11955 0.07%	1	s-23913, all-8410, s-16548, all-39353
Molecular Function: NEDD8 activating enzyme activity view genes	4 out of 2566 0.16%	8 out of 11955 0.07%	1	all-1855, n-29548, all-65054, all-65441
Molecular Function: SH3/SH2 adaptor activity view genes	7 out of 2566 0.27%	18 out of 11955 0.15%	1	s-5859, all-5323, n-27000, all-2975, n-644, all-4039, n-5000
Molecular Function: peptidyl-prolyl cis-trans isomerase activity view genes	10 out of 2566 0.39%	29 out of 11955 0.24%	1	n-53521, n-5155, n-47116, n-34519, n-9828, s-18206, n-29122, n-49577, s-14295, s-11631
Molecular Function: pyridoxal phosphate binding view genes	16 out of 2566 0.62%	52 out of 11955 0.43%	1	n-4177, all-6140, n-8886, n-7389, n-5053, n-14582, all-16714, n-8854, n-16405, all-63998, all-10618, n-10253, n-28498, all-6792, all-71440, all-24783
Molecular Function: DNA-directed RNA polymerase activity view genes	16 out of 2566 0.62%	52 out of 11955 0.43%	1	all-36328, n-10414, all-38701, n-19545, s-52454, s-3923, n-25382, all-67493, s-54322, all-35349, n-53492, s-52229, all-17662, n-2109, n-410, n-19118
Molecular Function: oxidoreductase activity, acting on the CH-CH group of donors view genes	8 out of 2566 0.31%	22 out of 11955 0.18%	1	all-22602, n-12821, all-2673, n-64333, n-35159, all-68757, all-18043, n-58253
Molecular Function: hydrogen ion transmembrane transporter activity view genes	6 out of 2566 0.23%	15 out of 11955 0.13%	1	all-19945, all-26302, all-1361, n-62980, n-32045, n-14529
Molecular Function: transferase activity, transferring acyl groups other than amino-acyl groups view genes	6 out of 2566 0.23%	15 out of 11955 0.13%	1	s-46815, n-41731, all-7298, n-48696, all-6721, all-41627
Molecular Function: sequence-specific DNA binding view genes	66 out of 2566 2.57%	263 out of 11955 2.20%	1	n-6853, n-8294, s-33485, n-3938, s-25381, s-30312, all-3135, all-57560, n-50, s-52447, all-10334, n-27290, n-13414, n-2545, s-22312, all-3658, n-4754, all-37835, n-10173, s-31583, all-10565, n-14277, all-9589, s-51467, all-32155, n-14062, n-4574, n-20434, n-38619, n-64791, n-24241, n-13110, all-7622, all-45922, all-71373, all-14350, n-21997, all-17023, n-24717, all-5581, n-60736, all-2027, all-38…
Molecular Function: repressing transcription factor binding view genes	7 out of 2566 0.27%	19 out of 11955 0.16%	1	all-42163, all-40137, all-9589, all-37835, n-38615, s-25381, n-3885
Molecular Function: oxidoreductase activity, acting on paired donors, with incorporation or reduction of molecular oxygen, reduced ascorbate as one donor, and incorporation of one atom of oxygen view genes	5 out of 2566 0.19%	12 out of 11955 0.10%	1	all-62253, all-21042, n-20246, n-25650, s-7321
Molecular Function: dioxygenase activity view genes	5 out of 2566 0.19%	12 out of 11955 0.10%	1	all-379, n-11356, all-45847, n-833, n-64087
Molecular Function: histone acetyltransferase activity (H3-K9 specific) view genes	5 out of 2566 0.19%	12 out of 11955 0.10%	1	all-56279, n-10704, all-23398, n-11356, n-63454
Molecular Function: protein dimerization activity view genes	12 out of 2566 0.47%	38 out of 11955 0.32%	1	n-26165, all-12522, n-51008, s-33871, n-64210, all-6934, n-2109, n-410, all-14122, all-8146, all-2869, s-1451
Molecular Function: 4 iron, 4 sulfur cluster binding view genes	9 out of 2566 0.35%	27 out of 11955 0.23%	1	n-4766, all-10486, n-12649, n-9530, all-64882, n-1239, s-53443, n-21238, n-11453
Molecular Function: lipid binding view genes	9 out of 2566 0.35%	27 out of 11955 0.23%	1	all-60063, all-3135, all-7991, n-45534, n-51008, n-5430, all-2446, n-13414, n-64210
Molecular Function: phosphatase regulator activity view genes	4 out of 2566 0.16%	9 out of 11955 0.08%	1	n-4235, s-6216, n-64426, s-21073
Molecular Function: DNA topoisomerase type II (ATP-hydrolyzing) activity view genes	4 out of 2566 0.16%	9 out of 11955 0.08%	1	n-54513, n-18517, all-870, s-51059
Molecular Function: peptidyl-proline 4-dioxygenase activity view genes	4 out of 2566 0.16%	9 out of 11955 0.08%	1	all-379, all-2037, s-5767, n-2080
Molecular Function: glutathione peroxidase activity view genes	4 out of 2566 0.16%	9 out of 11955 0.08%	1	n-7650, n-63749, all-12884, n-18017
Molecular Function: protein disulfide oxidoreductase activity view genes	6 out of 2566 0.23%	16 out of 11955 0.13%	1	s-51404, all-2037, n-2080, s-53378, n-4985, n-20663
Molecular Function: protein tyrosine kinase activity view genes	19 out of 2566 0.74%	67 out of 11955 0.56%	1	all-24551, n-1800, all-544, all-36854, n-4518, n-18699, all-70914, s-23052, all-18402, n-644, s-52605, n-31234, s-5859, all-43245, all-9478, all-145, all-46893, all-10192, all-4078
Molecular Function: ATP-dependent RNA helicase activity view genes	11 out of 2566 0.43%	35 out of 11955 0.29%	1	n-54513, all-31942, n-2476, n-63371, n-42508, all-71143, n-49462, n-2321, n-63788, n-38656, n-4012
Molecular Function: 2-alkenal reductase [NAD(P)] activity view genes	14 out of 2566 0.55%	47 out of 11955 0.39%	1	all-26538, n-46804, s-47256, all-29647, all-10618, all-23124, n-25112, s-19218, all-10132, s-46538, n-11030, all-32352, n-58430, n-48822
Molecular Function: protein-disulfide reductase activity view genes	3 out of 2566 0.12%	6 out of 11955 0.05%	1	s-51404, all-2037, s-53378
Molecular Function: peptide-N4-(N-acetyl-beta-glucosaminyl)asparagine amidase activity view genes	3 out of 2566 0.12%	6 out of 11955 0.05%	1	s-51404, all-2037, s-53378
Molecular Function: GTPase regulator activity view genes	3 out of 2566 0.12%	6 out of 11955 0.05%	1	n-17406, n-150, n-7035
Molecular Function: thioredoxin peroxidase activity view genes	2 out of 2566 0.08%	3 out of 11955 0.03%	1	n-18017, n-7650
Molecular Function: glycine hydroxymethyltransferase activity view genes	2 out of 2566 0.08%	3 out of 11955 0.03%	1	all-71440, all-63998
Molecular Function: S-adenosylmethionine-dependent methyltransferase activity view genes	2 out of 2566 0.08%	3 out of 11955 0.03%	1	all-1187, all-2589
Molecular Function: enoyl-CoA hydratase activity view genes	2 out of 2566 0.08%	3 out of 11955 0.03%	1	all-21443, n-64740
Molecular Function: translation initiation factor binding view genes	2 out of 2566 0.08%	3 out of 11955 0.03%	1	n-16246, all-44
Molecular Function: carbon-nitrogen ligase activity, with glutamine as amido-N-donor view genes	2 out of 2566 0.08%	3 out of 11955 0.03%	1	n-60736, n-64692
Molecular Function: histone demethylase activity (H3-K36 specific) view genes	2 out of 2566 0.08%	3 out of 11955 0.03%	1	all-56279, all-27738
Molecular Function: adenosylhomocysteinase activity view genes	2 out of 2566 0.08%	3 out of 11955 0.03%	1	n-59557, all-18044
Molecular Function: peptidyl-dipeptidase activity view genes	2 out of 2566 0.08%	3 out of 11955 0.03%	1	all-45919, all-5489
Molecular Function: U2 snRNA binding view genes	2 out of 2566 0.08%	3 out of 11955 0.03%	1	n-60534, all-37148
Molecular Function: hydrolase activity, acting on carbon-nitrogen (but not peptide) bonds, in linear amidines view genes	2 out of 2566 0.08%	3 out of 11955 0.03%	1	s-6162, n-48945
Molecular Function: pyruvate dehydrogenase (acetyl-transferring) activity view genes	2 out of 2566 0.08%	3 out of 11955 0.03%	1	n-24105, n-12212
Molecular Function: microfilament motor activity view genes	2 out of 2566 0.08%	3 out of 11955 0.03%	1	all-36507, n-46081
Molecular Function: glycoprotein-N-acetylgalactosamine 3-beta-galactosyltransferase activity view genes	2 out of 2566 0.08%	3 out of 11955 0.03%	1	n-2394, all-6808
Molecular Function: RNA polymerase II core promoter proximal region sequence-specific DNA binding transcription factor activity view genes	2 out of 2566 0.08%	3 out of 11955 0.03%	1	n-54618, n-64210
Molecular Function: calcium-dependent protein serine/threonine kinase activity view genes	5 out of 2566 0.19%	13 out of 11955 0.11%	1	all-5789, all-49335, all-11554, all-23881, all-7137
Molecular Function: exopeptidase activity view genes	5 out of 2566 0.19%	13 out of 11955 0.11%	1	n-59025, all-45919, s-36405, n-64753, n-2347
Molecular Function: ion channel binding view genes	5 out of 2566 0.19%	13 out of 11955 0.11%	1	all-5789, all-49335, all-11554, all-23881, all-7137
Molecular Function: extracellular matrix structural constituent conferring tensile strength view genes	6 out of 2566 0.23%	17 out of 11955 0.14%	1	n-65334, all-67241, n-12631, s-16311, all-154, all-8693
Molecular Function: protein serine/threonine phosphatase activity view genes	6 out of 2566 0.23%	17 out of 11955 0.14%	1	s-6216, all-3392, n-7298, n-4235, n-22616, s-21073
Molecular Function: nucleic acid binding view genes	144 out of 2566 5.61%	619 out of 11955 5.18%	1	s-37136, s-53337, all-2751, n-34739, all-60701, n-15728, s-54908, all-60953, n-62782, n-48974, n-32785, n-3028, s-28265, n-63639, n-49462, n-1183, all-55318, all-36262, n-54217, all-71047, all-59927, all-24966, n-38655, n-63371, all-71143, s-1724, n-34863, all-53108, all-20305, all-18634, n-17218, n-10101, all-50077, all-26934, all-12969, n-46420, n-22916, n-63424, n-3128, n-38619, n-62798, all-2…
Molecular Function: calmodulin-dependent protein kinase activity view genes	16 out of 2566 0.62%	57 out of 11955 0.48%	1	n-63007, n-63292, all-6262, all-16043, n-45562, all-5789, all-11554, s-35733, all-49335, s-51870, n-54102, s-12149, all-51251, s-181, all-23881, all-7137
Molecular Function: binding view genes	320 out of 2566 12.47%	1422 out of 11955 11.89%	1	all-40072, all-13047, n-19243, all-37768, s-2927, n-644, n-55623, all-70825, all-4385, s-22692, n-63001, all-6581, n-5173, n-2405, s-3400, all-3322, all-4397, n-57612, n-30205, all-15739, all-51690, all-71359, all-7218, n-64753, all-8595, s-23052, all-1880, n-2342, n-57405, n-14537, all-4119, n-64437, all-8585, n-63560, all-7044, n-1233, n-6050, s-33580, all-3514, all-8699, all-19383, all-58352, …
Molecular Function: RNA polymerase II carboxy-terminal domain kinase activity view genes	5 out of 2566 0.19%	14 out of 11955 0.12%	1	all-70479, n-8006, all-13041, n-63408, n-40787
Molecular Function: histone demethylase activity (H3-trimethyl-K4 specific) view genes	5 out of 2566 0.19%	14 out of 11955 0.12%	1	all-56279, n-10704, all-23398, n-11356, n-63454
Molecular Function: RNA polymerase II distal enhancer sequence-specific DNA binding view genes	6 out of 2566 0.23%	18 out of 11955 0.15%	1	n-52515, s-51939, s-11194, s-53787, all-7727, all-3847
Molecular Function: aminopeptidase activity view genes	6 out of 2566 0.23%	18 out of 11955 0.15%	1	n-8101, n-17017, n-24716, s-1550, n-11215, all-879
Molecular Function: protein phosphatase type 2A regulator activity view genes	3 out of 2566 0.12%	7 out of 11955 0.06%	1	n-7298, s-29688, n-22616
Molecular Function: SNARE binding view genes	3 out of 2566 0.12%	7 out of 11955 0.06%	1	n-1649, all-6986, all-5412
Molecular Function: arginine kinase activity view genes	3 out of 2566 0.12%	7 out of 11955 0.06%	1	s-52923, n-9249, n-6906
Molecular Function: copper ion binding view genes	3 out of 2566 0.12%	7 out of 11955 0.06%	1	n-26200, s-7097, s-21620
Molecular Function: RNA binding view genes	58 out of 2566 2.26%	241 out of 11955 2.02%	1	n-1564, n-782, n-43562, n-14056, all-1029, all-25539, n-8798, n-4518, n-48687, all-64882, n-47421, n-15728, n-17067, n-36569, s-53286, n-38677, n-3855, all-1833, all-2589, s-53596, all-71465, n-32785, all-5065, n-110, all-57847, all-9174, n-63590, n-38656, n-7763, s-52454, all-614, all-65667, s-39487, all-12655, s-46841, all-5974, all-10276, all-71143, n-32631, n-5284, all-574, n-2551, s-759, s-1…
Molecular Function: oxidoreductase activity, acting on paired donors, with incorporation or reduction of molecular oxygen, 2-oxoglutarate as one donor, and incorporation of one atom each of oxygen into both donors view genes	4 out of 2566 0.16%	11 out of 11955 0.09%	1	n-48886, all-23398, n-11356, all-45847
Molecular Function: hydrolase activity, acting on carbon-nitrogen (but not peptide) bonds, in cyclic amides view genes	2 out of 2566 0.08%	4 out of 11955 0.03%	1	n-21949, all-70375
Molecular Function: acid phosphatase activity view genes	2 out of 2566 0.08%	4 out of 11955 0.03%	1	n-51182, s-33871
Molecular Function: four-way junction DNA binding view genes	2 out of 2566 0.08%	4 out of 11955 0.03%	1	n-18517, s-51059
Molecular Function: sterol binding view genes	2 out of 2566 0.08%	4 out of 11955 0.03%	1	all-7298, all-56038
Molecular Function: histone methyltransferase activity (H3-K27 specific) view genes	2 out of 2566 0.08%	4 out of 11955 0.03%	1	n-8819, n-40204
Molecular Function: enzyme inhibitor activity view genes	2 out of 2566 0.08%	4 out of 11955 0.03%	1	s-2898, n-45534
Molecular Function: rRNA pseudouridylation guide activity view genes	2 out of 2566 0.08%	4 out of 11955 0.03%	1	n-13404, n-46047
Molecular Function: RNA 7-methylguanosine cap binding view genes	2 out of 2566 0.08%	4 out of 11955 0.03%	1	n-41494, n-2243
Molecular Function: rDNA binding view genes	2 out of 2566 0.08%	4 out of 11955 0.03%	1	n-18517, s-51059
Molecular Function: methylmalonyl-CoA mutase activity view genes	2 out of 2566 0.08%	4 out of 11955 0.03%	1	s-39772, n-857
Molecular Function: satellite DNA binding view genes	2 out of 2566 0.08%	4 out of 11955 0.03%	1	n-18517, s-51059
Molecular Function: uracil DNA N-glycosylase activity view genes	2 out of 2566 0.08%	4 out of 11955 0.03%	1	s-53768, n-11990
Molecular Function: RNA polymerase II regulatory region DNA binding view genes	2 out of 2566 0.08%	4 out of 11955 0.03%	1	all-7622, all-57560
Molecular Function: ion gated channel activity view genes	2 out of 2566 0.08%	4 out of 11955 0.03%	1	all-2866, all-1148
Molecular Function: (1->3)-beta-D-glucan binding view genes	2 out of 2566 0.08%	4 out of 11955 0.03%	1	all-14438, all-8514
Molecular Function: glycerol-3-phosphate O-acyltransferase activity view genes	2 out of 2566 0.08%	4 out of 11955 0.03%	1	all-3690, all-26639
Molecular Function: fatty-acyl-CoA binding view genes	2 out of 2566 0.08%	4 out of 11955 0.03%	1	all-7422, n-45534
Molecular Function: protein transporter activity view genes	8 out of 2566 0.31%	27 out of 11955 0.23%	1	s-2944, all-7564, n-1685, n-15646, n-18484, all-19663, all-23374, n-11701
Molecular Function: carboxylic ester hydrolase activity view genes	6 out of 2566 0.23%	19 out of 11955 0.16%	1	n-16810, all-57616, n-9254, all-7807, n-43034, n-16503
Molecular Function: acyl-CoA dehydrogenase activity view genes	6 out of 2566 0.23%	19 out of 11955 0.16%	1	all-7037, n-51778, all-51772, n-2641, s-37784, n-58253
Molecular Function: hydrogen-exporting ATPase activity, phosphorylative mechanism view genes	1 out of 2566 0.04%	1 out of 11955 0.01%	1	n-16836
Molecular Function: acryloyl-CoA reductase activity view genes	1 out of 2566 0.04%	1 out of 11955 0.01%	1	all-51772
Molecular Function: alditol:NADP+ 1-oxidoreductase activity view genes	1 out of 2566 0.04%	1 out of 11955 0.01%	1	s-4890
Molecular Function: methyl jasmonate esterase activity view genes	1 out of 2566 0.04%	1 out of 11955 0.01%	1	n-64791
Molecular Function: sucrose synthase activity view genes	1 out of 2566 0.04%	1 out of 11955 0.01%	1	all-26999
Molecular Function: ornithine decarboxylase inhibitor activity view genes	1 out of 2566 0.04%	1 out of 11955 0.01%	1	s-28681
Molecular Function: 4-alpha-glucanotransferase activity view genes	1 out of 2566 0.04%	1 out of 11955 0.01%	1	all-67609
Molecular Function: aminoacylase activity view genes	1 out of 2566 0.04%	1 out of 11955 0.01%	1	n-62266
Molecular Function: S-methyl-5-thioadenosine phosphorylase activity view genes	1 out of 2566 0.04%	1 out of 11955 0.01%	1	n-1054
Molecular Function: bisphosphoglycerate mutase activity view genes	1 out of 2566 0.04%	1 out of 11955 0.01%	1	n-7095
Molecular Function: phospholipase D activity view genes	1 out of 2566 0.04%	1 out of 11955 0.01%	1	n-48822
Molecular Function: 6-phosphofructo-2-kinase activity view genes	1 out of 2566 0.04%	1 out of 11955 0.01%	1	all-71118
Molecular Function: tryptophan 5-monooxygenase activity view genes	1 out of 2566 0.04%	1 out of 11955 0.01%	1	n-63428
Molecular Function: alcohol dehydrogenase (NAD) activity view genes	1 out of 2566 0.04%	1 out of 11955 0.01%	1	all-14339
Molecular Function: glutaryl-CoA dehydrogenase activity view genes	1 out of 2566 0.04%	1 out of 11955 0.01%	1	n-63596
Molecular Function: O-phospho-L-serine:2-oxoglutarate aminotransferase activity view genes	1 out of 2566 0.04%	1 out of 11955 0.01%	1	n-4177
Molecular Function: O-fucosylpeptide 3-beta-N-acetylglucosaminyltransferase activity view genes	1 out of 2566 0.04%	1 out of 11955 0.01%	1	n-3514
Molecular Function: long-chain-enoyl-CoA hydratase activity view genes	1 out of 2566 0.04%	1 out of 11955 0.01%	1	s-39496
Molecular Function: glutaminyl-peptide cyclotransferase activity view genes	1 out of 2566 0.04%	1 out of 11955 0.01%	1	n-28101
Molecular Function: tryptophan-tRNA ligase activity view genes	1 out of 2566 0.04%	1 out of 11955 0.01%	1	s-9507
Molecular Function: phosphoacetylglucosamine mutase activity view genes	1 out of 2566 0.04%	1 out of 11955 0.01%	1	n-2344
Molecular Function: peptidoglycan receptor activity view genes	1 out of 2566 0.04%	1 out of 11955 0.01%	1	n-1430
Molecular Function: RNA polymerase II core promoter sequence-specific DNA binding view genes	1 out of 2566 0.04%	1 out of 11955 0.01%	1	all-5581
Molecular Function: neuromedin U receptor activity view genes	1 out of 2566 0.04%	1 out of 11955 0.01%	1	all-66867
Molecular Function: ER retention sequence binding view genes	1 out of 2566 0.04%	1 out of 11955 0.01%	1	n-3761
Molecular Function: ribosomal large subunit binding view genes	1 out of 2566 0.04%	1 out of 11955 0.01%	1	s-22496
Molecular Function: clathrin heavy chain binding view genes	1 out of 2566 0.04%	1 out of 11955 0.01%	1	all-71638
Molecular Function: fumarylacetoacetase activity view genes	1 out of 2566 0.04%	1 out of 11955 0.01%	1	all-57075
Molecular Function: fructose-2,6-bisphosphate 2-phosphatase activity view genes	1 out of 2566 0.04%	1 out of 11955 0.01%	1	all-71118
Molecular Function: acetylornithine deacetylase activity view genes	1 out of 2566 0.04%	1 out of 11955 0.01%	1	all-7299
Molecular Function: histone acetyltransferase binding view genes	1 out of 2566 0.04%	1 out of 11955 0.01%	1	n-40204
Molecular Function: glucuronosyltransferase activity view genes	1 out of 2566 0.04%	1 out of 11955 0.01%	1	all-70534
Molecular Function: tripeptidase activity view genes	1 out of 2566 0.04%	1 out of 11955 0.01%	1	all-17481
Molecular Function: IMP cyclohydrolase activity view genes	1 out of 2566 0.04%	1 out of 11955 0.01%	1	all-21641
Molecular Function: myosin phosphatase regulator activity view genes	1 out of 2566 0.04%	1 out of 11955 0.01%	1	n-157
Molecular Function: glucose-6-phosphate dehydrogenase activity view genes	1 out of 2566 0.04%	1 out of 11955 0.01%	1	all-71805
Molecular Function: peptidyl-lysine 5-dioxygenase activity view genes	1 out of 2566 0.04%	1 out of 11955 0.01%	1	all-13270
Molecular Function: Rap GTPase activator activity view genes	1 out of 2566 0.04%	1 out of 11955 0.01%	1	n-1850
Molecular Function: KDEL sequence binding view genes	1 out of 2566 0.04%	1 out of 11955 0.01%	1	n-3761
Molecular Function: tRNA (guanine-N7-)-methyltransferase activity view genes	1 out of 2566 0.04%	1 out of 11955 0.01%	1	n-31915
Molecular Function: phosphoribosylaminoimidazolesuccinocarboxamide synthase activity view genes	1 out of 2566 0.04%	1 out of 11955 0.01%	1	n-43593
Molecular Function: 3-methyl-2-oxobutanoate dehydrogenase (2-methylpropanoyl-transferring) activity view genes	1 out of 2566 0.04%	1 out of 11955 0.01%	1	n-55367
Molecular Function: glutamine-fructose-6-phosphate transaminase (isomerizing) activity view genes	1 out of 2566 0.04%	1 out of 11955 0.01%	1	all-452
Molecular Function: tryptophan 2,3-dioxygenase activity view genes	1 out of 2566 0.04%	1 out of 11955 0.01%	1	s-53787
Molecular Function: translation repressor activity view genes	1 out of 2566 0.04%	1 out of 11955 0.01%	1	n-46420
Molecular Function: formate-tetrahydrofolate ligase activity view genes	1 out of 2566 0.04%	1 out of 11955 0.01%	1	n-509
Molecular Function: bisphosphoglycerate 2-phosphatase activity view genes	1 out of 2566 0.04%	1 out of 11955 0.01%	1	n-7095
Molecular Function: 5-aminolevulinate synthase activity view genes	1 out of 2566 0.04%	1 out of 11955 0.01%	1	all-16714
Molecular Function: heme-transporting ATPase activity view genes	1 out of 2566 0.04%	1 out of 11955 0.01%	1	n-2999
Molecular Function: mannan endo-1,4-beta-mannosidase activity view genes	1 out of 2566 0.04%	1 out of 11955 0.01%	1	all-12006
Molecular Function: protein adenylyltransferase activity view genes	1 out of 2566 0.04%	1 out of 11955 0.01%	1	s-52605
Molecular Function: glycolipid 6-alpha-mannosyltransferase activity view genes	1 out of 2566 0.04%	1 out of 11955 0.01%	1	all-26999
Molecular Function: dihydropyrimidinase activity view genes	1 out of 2566 0.04%	1 out of 11955 0.01%	1	all-56166
Molecular Function: cystathionine beta-synthase activity view genes	1 out of 2566 0.04%	1 out of 11955 0.01%	1	s-53446
Molecular Function: protein phosphatase inhibitor activity view genes	1 out of 2566 0.04%	1 out of 11955 0.01%	1	s-54883
Molecular Function: amidophosphoribosyltransferase activity view genes	1 out of 2566 0.04%	1 out of 11955 0.01%	1	all-55241
Molecular Function: NADH dehydrogenase (quinone) activity view genes	1 out of 2566 0.04%	1 out of 11955 0.01%	1	n-4656
Molecular Function: oligosaccharyl transferase activity view genes	1 out of 2566 0.04%	1 out of 11955 0.01%	1	s-45476
Molecular Function: beta-ureidopropionase activity view genes	1 out of 2566 0.04%	1 out of 11955 0.01%	1	n-35990
Molecular Function: dihydrolipoyllysine-residue acetyltransferase activity view genes	1 out of 2566 0.04%	1 out of 11955 0.01%	1	n-14589
Molecular Function: alkyl sulfatase activity view genes	1 out of 2566 0.04%	1 out of 11955 0.01%	1	n-64353
Molecular Function: U1 snRNA binding view genes	1 out of 2566 0.04%	1 out of 11955 0.01%	1	n-60534
Molecular Function: ribulokinase activity view genes	1 out of 2566 0.04%	1 out of 11955 0.01%	1	all-42627
Molecular Function: long-chain-3-hydroxyacyl-CoA dehydrogenase activity view genes	1 out of 2566 0.04%	1 out of 11955 0.01%	1	s-39496
Molecular Function: steroid dehydrogenase activity view genes	1 out of 2566 0.04%	1 out of 11955 0.01%	1	n-20654
Molecular Function: dihydrofolate reductase activity view genes	1 out of 2566 0.04%	1 out of 11955 0.01%	1	s-40803
Molecular Function: GPI-anchor transamidase activity view genes	1 out of 2566 0.04%	1 out of 11955 0.01%	1	all-71051
Molecular Function: 3-hydroxyacyl-[acyl-carrier-protein] dehydratase activity view genes	1 out of 2566 0.04%	1 out of 11955 0.01%	1	all-31313
Molecular Function: ATPase inhibitor activity view genes	1 out of 2566 0.04%	1 out of 11955 0.01%	1	s-2898
Molecular Function: protein serine/threonine kinase activator activity view genes	1 out of 2566 0.04%	1 out of 11955 0.01%	1	n-55561
Molecular Function: malonate-semialdehyde dehydrogenase (acetylating) activity view genes	1 out of 2566 0.04%	1 out of 11955 0.01%	1	all-7422
Molecular Function: nucleocytoplasmic transporter activity view genes	1 out of 2566 0.04%	1 out of 11955 0.01%	1	n-62944
Molecular Function: calcium-dependent protein binding view genes	1 out of 2566 0.04%	1 out of 11955 0.01%	1	all-71784
Molecular Function: methylmalonate-semialdehyde dehydrogenase (acylating) activity view genes	1 out of 2566 0.04%	1 out of 11955 0.01%	1	all-7422
Molecular Function: phosphoglycerate dehydrogenase activity view genes	1 out of 2566 0.04%	1 out of 11955 0.01%	1	n-16133
Molecular Function: acetyl-CoA:L-glutamate N-acetyltransferase activity view genes	1 out of 2566 0.04%	1 out of 11955 0.01%	1	all-436
Molecular Function: xylose isomerase activity view genes	1 out of 2566 0.04%	1 out of 11955 0.01%	1	s-14263
Molecular Function: thiosulfate sulfurtransferase activity view genes	1 out of 2566 0.04%	1 out of 11955 0.01%	1	n-14304
Molecular Function: L-tyrosine transmembrane transporter activity view genes	1 out of 2566 0.04%	1 out of 11955 0.01%	1	all-12431
Molecular Function: phosphoribosylaminoimidazole carboxylase activity view genes	1 out of 2566 0.04%	1 out of 11955 0.01%	1	n-43593
Molecular Function: retinyl-palmitate esterase activity view genes	1 out of 2566 0.04%	1 out of 11955 0.01%	1	n-64791
Molecular Function: ATP-dependent NAD(P)H-hydrate dehydratase activity view genes	1 out of 2566 0.04%	1 out of 11955 0.01%	1	n-33480
Molecular Function: N4-(beta-N-acetylglucosaminyl)-L-asparaginase activity view genes	1 out of 2566 0.04%	1 out of 11955 0.01%	1	all-22632
Molecular Function: adenosylmethionine decarboxylase activity view genes	1 out of 2566 0.04%	1 out of 11955 0.01%	1	all-70760
Molecular Function: snRNA stem-loop binding view genes	1 out of 2566 0.04%	1 out of 11955 0.01%	1	n-60534
Molecular Function: translation release factor activity, codon specific view genes	1 out of 2566 0.04%	1 out of 11955 0.01%	1	n-2800
Molecular Function: lipoate synthase activity view genes	1 out of 2566 0.04%	1 out of 11955 0.01%	1	s-53443
Molecular Function: troponin C binding view genes	1 out of 2566 0.04%	1 out of 11955 0.01%	1	s-1608
Molecular Function: small conjugating protein ligase activity view genes	1 out of 2566 0.04%	1 out of 11955 0.01%	1	all-70433
Molecular Function: L-aspartate:2-oxoglutarate aminotransferase activity view genes	1 out of 2566 0.04%	1 out of 11955 0.01%	1	n-8854
Molecular Function: 1-alkyl-2-acetylglycerophosphocholine esterase activity view genes	1 out of 2566 0.04%	1 out of 11955 0.01%	1	n-5827
Molecular Function: Ala-tRNA(Pro) hydrolase activity view genes	1 out of 2566 0.04%	1 out of 11955 0.01%	1	n-48297
Molecular Function: glutathione-disulfide reductase activity view genes	1 out of 2566 0.04%	1 out of 11955 0.01%	1	n-6775
Molecular Function: RNA ligase (ATP) activity view genes	1 out of 2566 0.04%	1 out of 11955 0.01%	1	n-63802
Molecular Function: glutamine-tRNA ligase activity view genes	1 out of 2566 0.04%	1 out of 11955 0.01%	1	all-1340
Molecular Function: pseudouridylate synthase activity view genes	1 out of 2566 0.04%	1 out of 11955 0.01%	1	n-2199
Molecular Function: methyl indole-3-acetate esterase activity view genes	1 out of 2566 0.04%	1 out of 11955 0.01%	1	n-64791
Molecular Function: protein-L-isoaspartate (D-aspartate) O-methyltransferase activity view genes	1 out of 2566 0.04%	1 out of 11955 0.01%	1	n-41848
Molecular Function: N-acetylglucosamine-6-sulfatase activity view genes	1 out of 2566 0.04%	1 out of 11955 0.01%	1	n-64353
Molecular Function: GDP-Man:Man1GlcNAc2-PP-Dol alpha-1,3-mannosyltransferase activity view genes	1 out of 2566 0.04%	1 out of 11955 0.01%	1	all-26999
Molecular Function: DNA polymerase processivity factor activity view genes	1 out of 2566 0.04%	1 out of 11955 0.01%	1	n-12764
Molecular Function: potassium ion binding view genes	1 out of 2566 0.04%	1 out of 11955 0.01%	1	n-42871
Molecular Function: tyrosine 3-monooxygenase activity view genes	1 out of 2566 0.04%	1 out of 11955 0.01%	1	n-63428
Molecular Function: isocitrate hydro-lyase (cis-aconitate-forming) activity view genes	1 out of 2566 0.04%	1 out of 11955 0.01%	1	all-64882
Molecular Function: uridine phosphorylase activity view genes	1 out of 2566 0.04%	1 out of 11955 0.01%	1	s-41424
Molecular Function: phosphoribosylaminoimidazolecarboxamide formyltransferase activity view genes	1 out of 2566 0.04%	1 out of 11955 0.01%	1	all-21641
Molecular Function: tRNA (adenine-N1-)-methyltransferase activity view genes	1 out of 2566 0.04%	1 out of 11955 0.01%	1	n-65316
Molecular Function: enzyme activator activity view genes	1 out of 2566 0.04%	1 out of 11955 0.01%	1	n-8819
Molecular Function: NAD(P)+ transhydrogenase (AB-specific) activity view genes	1 out of 2566 0.04%	1 out of 11955 0.01%	1	s-28774
Molecular Function: 5-(carboxyamino)imidazole ribonucleotide mutase activity view genes	1 out of 2566 0.04%	1 out of 11955 0.01%	1	n-43593
Molecular Function: isovaleryl-CoA dehydrogenase activity view genes	1 out of 2566 0.04%	1 out of 11955 0.01%	1	n-2170
Molecular Function: selenide, water dikinase activity view genes	1 out of 2566 0.04%	1 out of 11955 0.01%	1	n-6393
Molecular Function: alpha-catenin binding view genes	1 out of 2566 0.04%	1 out of 11955 0.01%	1	n-7469
Molecular Function: 4-alpha-hydroxytetrahydrobiopterin dehydratase activity view genes	1 out of 2566 0.04%	1 out of 11955 0.01%	1	n-63563
Molecular Function: ceramidase activity view genes	1 out of 2566 0.04%	1 out of 11955 0.01%	1	all-71291
Molecular Function: ribosomal-protein-alanine N-acetyltransferase activity view genes	1 out of 2566 0.04%	1 out of 11955 0.01%	1	n-32198
Molecular Function: carnitine:acyl carnitine antiporter activity view genes	1 out of 2566 0.04%	1 out of 11955 0.01%	1	n-1441
Molecular Function: diazepam binding view genes	1 out of 2566 0.04%	1 out of 11955 0.01%	1	n-45534
Molecular Function: threonine-tRNA ligase activity view genes	1 out of 2566 0.04%	1 out of 11955 0.01%	1	s-39216
Molecular Function: succinate dehydrogenase (ubiquinone) activity view genes	1 out of 2566 0.04%	1 out of 11955 0.01%	1	n-11453
Molecular Function: LIM domain binding view genes	1 out of 2566 0.04%	1 out of 11955 0.01%	1	n-48076
Molecular Function: deoxyribose-phosphate aldolase activity view genes	1 out of 2566 0.04%	1 out of 11955 0.01%	1	n-43930
Molecular Function: UDP-N-acetylmuramoylalanyl-D-glutamyl-2,6-diaminopimelate-D-alanyl-D-alanine ligase activity view genes	1 out of 2566 0.04%	1 out of 11955 0.01%	1	all-17059
Molecular Function: phosphatidylethanolamine binding view genes	1 out of 2566 0.04%	1 out of 11955 0.01%	1	all-71254
Molecular Function: methyl salicylate esterase activity view genes	1 out of 2566 0.04%	1 out of 11955 0.01%	1	n-64791
Molecular Function: phenylalanine 4-monooxygenase activity view genes	1 out of 2566 0.04%	1 out of 11955 0.01%	1	n-63428
Molecular Function: L-phenylalanine:2-oxoglutarate aminotransferase activity view genes	1 out of 2566 0.04%	1 out of 11955 0.01%	1	n-8854
Molecular Function: dihydrolipoyllysine-residue succinyltransferase activity view genes	1 out of 2566 0.04%	1 out of 11955 0.01%	1	n-63364
Molecular Function: symporter activity view genes	13 out of 2566 0.51%	48 out of 11955 0.40%	1	all-18874, all-837, all-69916, all-1236, n-30100, all-3139, all-55589, n-59916, all-775, n-11063, all-3788, n-2177, all-1922
Molecular Function: isomerase activity view genes	16 out of 2566 0.62%	61 out of 11955 0.51%	1	s-8008, s-51939, s-32590, s-6250, all-16684, s-2735, s-899, s-5767, n-4985, all-22757, s-125, n-34519, s-19362, s-18206, n-6577, all-550
Molecular Function: signaling receptor activity view genes	11 out of 2566 0.43%	40 out of 11955 0.33%	1	all-24551, n-2829, all-69916, all-1651, all-2887, n-64210, all-175, n-5430, all-10192, n-2177, n-13414
Molecular Function: insulin-like growth factor receptor binding view genes	3 out of 2566 0.12%	8 out of 11955 0.07%	1	all-51251, n-40541, n-14981
Molecular Function: protein C-terminus binding view genes	3 out of 2566 0.12%	8 out of 11955 0.07%	1	all-17023, s-22308, all-65441
Molecular Function: U5 snRNA binding view genes	3 out of 2566 0.12%	8 out of 11955 0.07%	1	s-29906, s-14264, n-15985
Molecular Function: oxidoreductase activity, acting on the CH-NH2 group of donors, oxygen as acceptor view genes	3 out of 2566 0.12%	8 out of 11955 0.07%	1	n-63948, all-10052, n-50082
Molecular Function: phosphatidylinositol-3,4,5-trisphosphate binding view genes	3 out of 2566 0.12%	8 out of 11955 0.07%	1	s-2408, all-5206, s-15029
Molecular Function: transcription cofactor activity view genes	3 out of 2566 0.12%	8 out of 11955 0.07%	1	n-48076, n-48974, n-10591
Molecular Function: oxidoreductase activity, acting on CH or CH2 groups view genes	3 out of 2566 0.12%	8 out of 11955 0.07%	1	n-7691, all-1991, n-38648
Molecular Function: cGMP-dependent protein kinase activity view genes	3 out of 2566 0.12%	8 out of 11955 0.07%	1	s-28159, all-36951, all-2223
Molecular Function: ribosome binding view genes	3 out of 2566 0.12%	8 out of 11955 0.07%	1	n-38377, all-44, s-22496
Molecular Function: U6 snRNA binding view genes	3 out of 2566 0.12%	8 out of 11955 0.07%	1	s-29906, s-14264, n-15985
Molecular Function: kinesin binding view genes	3 out of 2566 0.12%	8 out of 11955 0.07%	1	all-70320, all-1454, n-57223
Molecular Function: protein-glutamine gamma-glutamyltransferase activity view genes	3 out of 2566 0.12%	8 out of 11955 0.07%	1	all-2037, n-2080, s-5767
Molecular Function: carboxy-lyase activity view genes	3 out of 2566 0.12%	8 out of 11955 0.07%	1	s-11029, n-8886, all-34065
Molecular Function: damaged DNA binding view genes	4 out of 2566 0.16%	12 out of 11955 0.10%	1	s-1944, n-17867, all-71235, n-91
Molecular Function: cytoskeletal protein binding view genes	19 out of 2566 0.74%	76 out of 11955 0.64%	1	s-36633, n-61124, all-6760, s-52671, s-52572, all-71848, s-11984, n-24045, n-1999, n-3452, all-16468, s-10364, n-54618, all-52553, n-7469, n-62800, all-10583, n-33643, all-7482
Molecular Function: cation channel activity view genes	18 out of 2566 0.70%	72 out of 11955 0.60%	1	all-18874, all-17867, n-30100, all-3139, n-59916, all-775, n-11063, all-15651, n-2829, n-698, all-837, all-2866, all-1236, all-68813, all-55589, all-3788, n-2177, all-1922
Molecular Function: structural constituent of cytoskeleton view genes	15 out of 2566 0.58%	59 out of 11955 0.49%	1	s-51939, n-7458, n-65225, s-9342, n-28033, all-35349, n-65155, all-15070, all-34491, all-1903, s-2466, s-3287, all-32647, s-52817, all-787
Molecular Function: receptor activity view genes	15 out of 2566 0.58%	59 out of 11955 0.49%	1	n-32044, all-13875, n-11010, all-52358, all-4989, s-6580, all-24154, s-582, all-61436, all-35591, all-67190, all-1880, all-10919, s-51553, all-2099
Molecular Function: glycerol-3-phosphate dehydrogenase [NAD+] activity view genes	2 out of 2566 0.08%	5 out of 11955 0.04%	1	s-54497, n-313
Molecular Function: Rho GTPase binding view genes	2 out of 2566 0.08%	5 out of 11955 0.04%	1	s-17632, n-51841
Molecular Function: poly(A) binding view genes	2 out of 2566 0.08%	5 out of 11955 0.04%	1	n-48974, s-32649
Molecular Function: cobalamin binding view genes	2 out of 2566 0.08%	5 out of 11955 0.04%	1	s-39772, n-857
Molecular Function: hexokinase activity view genes	2 out of 2566 0.08%	5 out of 11955 0.04%	1	s-11711, s-14294
Molecular Function: UDP-glucose:glycoprotein glucosyltransferase activity view genes	2 out of 2566 0.08%	5 out of 11955 0.04%	1	n-833, n-15792
Molecular Function: muramyl dipeptide binding view genes	2 out of 2566 0.08%	5 out of 11955 0.04%	1	n-1430, all-38430
Molecular Function: cadherin binding view genes	2 out of 2566 0.08%	5 out of 11955 0.04%	1	n-7469, s-1782
Molecular Function: oxidoreductase activity, acting on a sulfur group of donors, NAD(P) as acceptor view genes	2 out of 2566 0.08%	5 out of 11955 0.04%	1	all-7299, all-6604
Molecular Function: ATP-dependent 5'-3' DNA helicase activity view genes	2 out of 2566 0.08%	5 out of 11955 0.04%	1	n-39928, n-10830
Molecular Function: asparaginase activity view genes	2 out of 2566 0.08%	5 out of 11955 0.04%	1	n-14184, all-2544
Molecular Function: sulfate adenylyltransferase (ATP) activity view genes	2 out of 2566 0.08%	5 out of 11955 0.04%	1	all-14454, all-8392
Molecular Function: peroxiredoxin activity view genes	2 out of 2566 0.08%	5 out of 11955 0.04%	1	n-18017, n-7650
Molecular Function: 7S RNA binding view genes	2 out of 2566 0.08%	5 out of 11955 0.04%	1	n-26747, n-3329
Molecular Function: muscle alpha-actinin binding view genes	2 out of 2566 0.08%	5 out of 11955 0.04%	1	s-17489, all-7482
Molecular Function: snoRNA binding view genes	2 out of 2566 0.08%	5 out of 11955 0.04%	1	n-13404, n-46047
Molecular Function: peptidase inhibitor activity view genes	5 out of 2566 0.19%	17 out of 11955 0.14%	1	s-54276, n-10338, all-71356, s-4118, n-9405
Molecular Function: phosphoprotein phosphatase activity view genes	18 out of 2566 0.70%	73 out of 11955 0.61%	1	all-1628, all-16630, all-66231, n-19033, n-55561, n-4235, s-347, all-20413, s-39009, n-64426, n-7487, all-25771, n-63232, s-21073, n-43641, n-64430, n-8360, s-33786
Molecular Function: myosin VI head/neck binding view genes	4 out of 2566 0.16%	13 out of 11955 0.11%	1	n-63007, n-63292, s-181, all-6262
Molecular Function: activating transcription factor binding view genes	4 out of 2566 0.16%	13 out of 11955 0.11%	1	n-4574, n-50, n-39216, all-71373
Molecular Function: myosin V binding view genes	4 out of 2566 0.16%	13 out of 11955 0.11%	1	n-63007, n-63292, s-181, all-6262
Molecular Function: neurotransmitter receptor activity view genes	4 out of 2566 0.16%	13 out of 11955 0.11%	1	n-63736, n-10389, all-45239, all-56762
Molecular Function: chromatin insulator sequence binding view genes	3 out of 2566 0.12%	9 out of 11955 0.08%	1	s-51939, s-22312, all-3847
Molecular Function: DNA-(apurinic or apyrimidinic site) lyase activity view genes	3 out of 2566 0.12%	9 out of 11955 0.08%	1	n-7585, all-57350, n-1594
Molecular Function: potassium channel activity view genes	3 out of 2566 0.12%	9 out of 11955 0.08%	1	all-2866, all-1148, all-11680
Molecular Function: histone methyltransferase activity (H3-K9 specific) view genes	3 out of 2566 0.12%	9 out of 11955 0.08%	1	n-57816, n-8819, n-40204
Molecular Function: DEAD/H-box RNA helicase binding view genes	3 out of 2566 0.12%	9 out of 11955 0.08%	1	n-54513, all-65441, n-4012
Molecular Function: active transmembrane transporter activity view genes	3 out of 2566 0.12%	9 out of 11955 0.08%	1	all-58407, all-5658, all-5380
Molecular Function: protein disulfide isomerase activity view genes	3 out of 2566 0.12%	9 out of 11955 0.08%	1	all-2037, n-2080, s-5767
Molecular Function: serotonin transmembrane transporter activity view genes	16 out of 2566 0.62%	65 out of 11955 0.54%	1	all-18874, all-17867, n-30100, all-3139, n-59916, all-775, n-11063, all-15651, n-2829, all-837, n-698, all-1236, all-55589, all-3788, n-2177, all-1922
Molecular Function: RNA polymerase II core promoter proximal region sequence-specific DNA binding transcription factor activity involved in positive regulation of transcription view genes	25 out of 2566 0.97%	105 out of 11955 0.88%	1	all-34124, n-6853, all-14350, all-37835, all-35770, n-19317, n-3885, s-31583, all-1698, all-40137, all-9589, s-51939, n-6618, all-5581, n-60736, all-3847, n-38615, s-25381, all-42163, s-22035, all-57094, n-24241, all-8763, all-1549, all-45922
Molecular Function: transaminase activity view genes	6 out of 2566 0.23%	22 out of 11955 0.18%	1	n-63129, all-70957, all-6140, all-21043, n-28498, s-5172
Molecular Function: 3'-5' DNA helicase activity view genes	6 out of 2566 0.23%	22 out of 11955 0.18%	1	s-51939, s-5140, n-63915, all-3847, all-1017, n-3687
Molecular Function: aminoacyl-tRNA ligase activity view genes	11 out of 2566 0.43%	44 out of 11955 0.37%	1	all-16310, n-55376, s-52223, s-39216, n-52646, all-7306, all-1340, n-48297, n-5545, n-770, all-21603
Molecular Function: NADP binding view genes	5 out of 2566 0.19%	18 out of 11955 0.15%	1	n-6750, s-28774, n-20663, all-71805, n-6775
Molecular Function: RNA helicase activity view genes	5 out of 2566 0.19%	18 out of 11955 0.15%	1	n-25146, n-32631, n-2321, all-36262, all-53108
Molecular Function: steroid hormone receptor activity view genes	5 out of 2566 0.19%	18 out of 11955 0.15%	1	all-3135, n-51008, n-5430, all-8763, n-13414
Molecular Function: structural constituent of chitin-based larval cuticle view genes	4 out of 2566 0.16%	14 out of 11955 0.12%	1	n-32433, all-52255, s-39886, n-11632
Molecular Function: cation binding view genes	4 out of 2566 0.16%	14 out of 11955 0.12%	1	s-51314, all-35765, s-53787, all-3847
Molecular Function: G-protein coupled peptide receptor activity view genes	4 out of 2566 0.16%	14 out of 11955 0.12%	1	all-49397, n-26265, all-45239, all-47748
Molecular Function: sphingomyelin phosphodiesterase activity view genes	7 out of 2566 0.27%	27 out of 11955 0.23%	1	all-58490, s-2190, all-33665, all-14682, all-18327, all-45623, s-6767
Molecular Function: methyltransferase activity view genes	18 out of 2566 0.70%	76 out of 11955 0.64%	1	n-13404, n-57816, all-13270, all-23398, all-63998, n-60655, n-53805, all-2634, n-53856, all-4774, s-5739, all-16083, all-1339, n-9641, all-4500, all-4627, n-11356, all-71440
Molecular Function: propionyl-CoA carboxylase activity view genes	3 out of 2566 0.12%	10 out of 11955 0.08%	1	s-29282, all-7016, s-46562
Molecular Function: hydrolase activity, acting on acid anhydrides, catalyzing transmembrane movement of substances view genes	3 out of 2566 0.12%	10 out of 11955 0.08%	1	n-140, all-5380, all-59064
Molecular Function: thiamine pyrophosphate binding view genes	3 out of 2566 0.12%	10 out of 11955 0.08%	1	n-2417, n-64916, s-19433
Molecular Function: hydrolase activity view genes	144 out of 2566 5.61%	653 out of 11955 5.46%	1	s-4794, all-58619, n-47580, n-26528, all-13047, s-31155, all-44050, n-10093, all-739, n-997, n-51778, n-23578, s-2927, n-55623, all-48308, n-46081, n-64937, n-12410, n-33264, all-41747, s-11112, n-65249, n-51226, all-699, all-7179, s-8672, n-12207, n-8980, n-31244, n-29778, n-44458, n-62980, s-27923, n-23538, all-4119, all-23859, all-2003, all-12410, all-10386, s-1597, all-17064, all-71796, all-3…
Molecular Function: hydrolase activity, acting on glycosyl bonds view genes	17 out of 2566 0.66%	72 out of 11955 0.60%	1	all-62721, s-7862, all-5020, all-10435, s-53885, n-848, n-63579, all-6949, n-64295, all-41713, all-4832, all-2037, n-32, all-10998, all-70634, all-42137, n-48010
Molecular Function: Wnt-activated receptor activity view genes	2 out of 2566 0.08%	6 out of 11955 0.05%	1	all-18, n-41352
Molecular Function: poly(U) RNA binding view genes	2 out of 2566 0.08%	6 out of 11955 0.05%	1	s-445, n-62782
Molecular Function: Ran GTPase activator activity view genes	2 out of 2566 0.08%	6 out of 11955 0.05%	1	s-6767, all-33665
Molecular Function: oxidoreductase activity, acting on paired donors, with incorporation or reduction of molecular oxygen, NAD(P)H as one donor, and incorporation of one atom of oxygen view genes	2 out of 2566 0.08%	6 out of 11955 0.05%	1	s-27933, n-55383
Molecular Function: calcium channel regulator activity view genes	2 out of 2566 0.08%	6 out of 11955 0.05%	1	n-62974, n-43501
Molecular Function: alpha-L-fucosidase activity view genes	2 out of 2566 0.08%	6 out of 11955 0.05%	1	n-48010, s-7862
Molecular Function: NADH dehydrogenase activity view genes	2 out of 2566 0.08%	6 out of 11955 0.05%	1	n-5720, n-6510
Molecular Function: histone deacetylase binding view genes	2 out of 2566 0.08%	6 out of 11955 0.05%	1	all-3847, n-40204
Molecular Function: structural constituent of chitin-based cuticle view genes	2 out of 2566 0.08%	6 out of 11955 0.05%	1	all-43963, all-62750
Molecular Function: peptide binding view genes	2 out of 2566 0.08%	6 out of 11955 0.05%	1	n-5155, n-47116
Molecular Function: nicotinate phosphoribosyltransferase activity view genes	2 out of 2566 0.08%	6 out of 11955 0.05%	1	n-14347, all-66510
Molecular Function: cGMP binding view genes	2 out of 2566 0.08%	6 out of 11955 0.05%	1	s-28159, all-2223
Molecular Function: TFIID-class transcription factor binding view genes	2 out of 2566 0.08%	6 out of 11955 0.05%	1	all-3847, s-51939
Molecular Function: ATPase activity, coupled to transmembrane movement of ions, phosphorylative mechanism view genes	2 out of 2566 0.08%	6 out of 11955 0.05%	1	n-613, s-53686
Molecular Function: C2H2 zinc finger domain binding view genes	2 out of 2566 0.08%	6 out of 11955 0.05%	1	all-3847, s-51939
Molecular Function: UDP-glycosyltransferase activity view genes	2 out of 2566 0.08%	6 out of 11955 0.05%	1	n-62634, n-1224
Molecular Function: proteasome binding view genes	1 out of 2566 0.04%	2 out of 11955 0.02%	1	n-14438
Molecular Function: JUN kinase kinase activity view genes	1 out of 2566 0.04%	2 out of 11955 0.02%	1	s-20280
Molecular Function: ferrochelatase activity view genes	1 out of 2566 0.04%	2 out of 11955 0.02%	1	n-24439
Molecular Function: 1-phosphatidylinositol-3-kinase activity view genes	1 out of 2566 0.04%	2 out of 11955 0.02%	1	all-42436
Molecular Function: phosphogluconate dehydrogenase (decarboxylating) activity view genes	1 out of 2566 0.04%	2 out of 11955 0.02%	1	n-6750
Molecular Function: phosphopyruvate hydratase activity view genes	1 out of 2566 0.04%	2 out of 11955 0.02%	1	s-27278
Molecular Function: sulfurtransferase activity view genes	1 out of 2566 0.04%	2 out of 11955 0.02%	1	all-2390
Molecular Function: ribonucleoside-diphosphate reductase activity, thioredoxin disulfide as acceptor view genes	1 out of 2566 0.04%	2 out of 11955 0.02%	1	n-1868
Molecular Function: glycine dehydrogenase (decarboxylating) activity view genes	1 out of 2566 0.04%	2 out of 11955 0.02%	1	all-10618
Molecular Function: glucokinase activity view genes	1 out of 2566 0.04%	2 out of 11955 0.02%	1	s-11711
Molecular Function: pyruvate kinase activity view genes	1 out of 2566 0.04%	2 out of 11955 0.02%	1	n-42871
Molecular Function: glycine-tRNA ligase activity view genes	1 out of 2566 0.04%	2 out of 11955 0.02%	1	all-6934
Molecular Function: glucose dehydrogenase activity view genes	1 out of 2566 0.04%	2 out of 11955 0.02%	1	n-313
Molecular Function: oxidoreductase activity, acting on a sulfur group of donors view genes	1 out of 2566 0.04%	2 out of 11955 0.02%	1	s-5767
Molecular Function: S-(hydroxymethyl)glutathione dehydrogenase activity view genes	1 out of 2566 0.04%	2 out of 11955 0.02%	1	all-14339
Molecular Function: serine-type exopeptidase activity view genes	1 out of 2566 0.04%	2 out of 11955 0.02%	1	all-4457
Molecular Function: dopamine beta-monooxygenase activity view genes	1 out of 2566 0.04%	2 out of 11955 0.02%	1	s-7097
Molecular Function: odorant binding view genes	1 out of 2566 0.04%	2 out of 11955 0.02%	1	n-1685
Molecular Function: serine-tRNA ligase activity view genes	1 out of 2566 0.04%	2 out of 11955 0.02%	1	s-28534
Molecular Function: citrate (Si)-synthase activity view genes	1 out of 2566 0.04%	2 out of 11955 0.02%	1	n-2058
Molecular Function: rRNA (uridine-2'-O-)-methyltransferase activity view genes	1 out of 2566 0.04%	2 out of 11955 0.02%	1	all-4774
Molecular Function: myosin II binding view genes	1 out of 2566 0.04%	2 out of 11955 0.02%	1	n-4924
Molecular Function: polyamine oxidase activity view genes	1 out of 2566 0.04%	2 out of 11955 0.02%	1	all-2634
Molecular Function: acyl-[acyl-carrier-protein]-UDP-N-acetylglucosamine O-acyltransferase activity view genes	1 out of 2566 0.04%	2 out of 11955 0.02%	1	n-7175
Molecular Function: DNA/RNA helicase activity view genes	1 out of 2566 0.04%	2 out of 11955 0.02%	1	n-48974
Molecular Function: GMP reductase activity view genes	1 out of 2566 0.04%	2 out of 11955 0.02%	1	n-64121
Molecular Function: mannokinase activity view genes	1 out of 2566 0.04%	2 out of 11955 0.02%	1	s-11711
Molecular Function: dopamine neurotransmitter receptor activity, coupled via Gi/Go view genes	1 out of 2566 0.04%	2 out of 11955 0.02%	1	all-31261
Molecular Function: methionine adenosyltransferase activity view genes	1 out of 2566 0.04%	2 out of 11955 0.02%	1	s-51761
Molecular Function: polyribonucleotide nucleotidyltransferase activity view genes	1 out of 2566 0.04%	2 out of 11955 0.02%	1	all-71143
Molecular Function: S-formylglutathione hydrolase activity view genes	1 out of 2566 0.04%	2 out of 11955 0.02%	1	n-64791
Molecular Function: peptidylamidoglycolate lyase activity view genes	1 out of 2566 0.04%	2 out of 11955 0.02%	1	n-820
Molecular Function: fructose 1,6-bisphosphate 1-phosphatase activity view genes	1 out of 2566 0.04%	2 out of 11955 0.02%	1	all-35933
Molecular Function: inositol-polyphosphate 5-phosphatase activity view genes	1 out of 2566 0.04%	2 out of 11955 0.02%	1	n-53516
Molecular Function: olfactory receptor activity view genes	1 out of 2566 0.04%	2 out of 11955 0.02%	1	n-1685
Molecular Function: alpha-1,6-mannosylglycoprotein 2-beta-N-acetylglucosaminyltransferase activity view genes	1 out of 2566 0.04%	2 out of 11955 0.02%	1	n-33013
Molecular Function: NAPE-specific phospholipase D activity view genes	1 out of 2566 0.04%	2 out of 11955 0.02%	1	n-48822
Molecular Function: heparan sulfate proteoglycan binding view genes	1 out of 2566 0.04%	2 out of 11955 0.02%	1	all-71254
Molecular Function: glucosamine-6-phosphate deaminase activity view genes	1 out of 2566 0.04%	2 out of 11955 0.02%	1	all-70183
Molecular Function: pyruvate transmembrane transporter activity view genes	1 out of 2566 0.04%	2 out of 11955 0.02%	1	n-64650
Molecular Function: kynurenine 3-monooxygenase activity view genes	1 out of 2566 0.04%	2 out of 11955 0.02%	1	s-27877
Molecular Function: hydroxyacylglutathione hydrolase activity view genes	1 out of 2566 0.04%	2 out of 11955 0.02%	1	n-64836
Molecular Function: cyclic nucleotide-dependent guanyl-nucleotide exchange factor activity view genes	1 out of 2566 0.04%	2 out of 11955 0.02%	1	all-36951
Molecular Function: long-chain-fatty-acyl-CoA reductase activity view genes	1 out of 2566 0.04%	2 out of 11955 0.02%	1	n-1258
Molecular Function: epidermal growth factor receptor binding view genes	1 out of 2566 0.04%	2 out of 11955 0.02%	1	all-2145
Molecular Function: alcohol dehydrogenase activity, zinc-dependent view genes	1 out of 2566 0.04%	2 out of 11955 0.02%	1	all-14339
Molecular Function: L-ascorbic acid binding view genes	1 out of 2566 0.04%	2 out of 11955 0.02%	1	n-48886
Molecular Function: glutamate dehydrogenase (NAD+) activity view genes	1 out of 2566 0.04%	2 out of 11955 0.02%	1	n-313
Molecular Function: amylo-alpha-1,6-glucosidase activity view genes	1 out of 2566 0.04%	2 out of 11955 0.02%	1	all-67609
Molecular Function: phosphoglycerate kinase activity view genes	1 out of 2566 0.04%	2 out of 11955 0.02%	1	n-14732
Molecular Function: glutamate dehydrogenase [NAD(P)+] activity view genes	1 out of 2566 0.04%	2 out of 11955 0.02%	1	n-313
Molecular Function: ubiquinone binding view genes	1 out of 2566 0.04%	2 out of 11955 0.02%	1	n-11453
Molecular Function: tRNA methyltransferase activity view genes	1 out of 2566 0.04%	2 out of 11955 0.02%	1	n-18268
Molecular Function: dihydroorotate dehydrogenase activity view genes	1 out of 2566 0.04%	2 out of 11955 0.02%	1	all-21292
Molecular Function: 3R-hydroxyacyl-CoA dehydratase activity view genes	1 out of 2566 0.04%	2 out of 11955 0.02%	1	n-64740
Molecular Function: O-methyltransferase activity view genes	1 out of 2566 0.04%	2 out of 11955 0.02%	1	all-1187
Molecular Function: 4-aminobutyrate transaminase activity view genes	1 out of 2566 0.04%	2 out of 11955 0.02%	1	n-63129
Molecular Function: phosphate ion transmembrane transporter activity view genes	1 out of 2566 0.04%	2 out of 11955 0.02%	1	n-53233
Molecular Function: clathrin binding view genes	1 out of 2566 0.04%	2 out of 11955 0.02%	1	n-11215
Molecular Function: glucose-6-phosphate isomerase activity view genes	1 out of 2566 0.04%	2 out of 11955 0.02%	1	n-33209
Molecular Function: deacetylase activity view genes	1 out of 2566 0.04%	2 out of 11955 0.02%	1	all-7044
Molecular Function: dihydropyrimidine dehydrogenase (NADP+) activity view genes	1 out of 2566 0.04%	2 out of 11955 0.02%	1	all-21292
Molecular Function: formyltetrahydrofolate dehydrogenase activity view genes	1 out of 2566 0.04%	2 out of 11955 0.02%	1	all-1339
Molecular Function: peptide receptor activity view genes	1 out of 2566 0.04%	2 out of 11955 0.02%	1	n-63697
Molecular Function: testosterone dehydrogenase [NAD(P)] activity view genes	1 out of 2566 0.04%	2 out of 11955 0.02%	1	n-1258
Molecular Function: protein C-terminal S-isoprenylcysteine carboxyl O-methyltransferase activity view genes	1 out of 2566 0.04%	2 out of 11955 0.02%	1	n-55378
Molecular Function: UDP-glucose 4-epimerase activity view genes	1 out of 2566 0.04%	2 out of 11955 0.02%	1	all-29299
Molecular Function: transferase activity, transferring alkyl or aryl (other than methyl) groups view genes	1 out of 2566 0.04%	2 out of 11955 0.02%	1	all-26190
Molecular Function: asparagine-tRNA ligase activity view genes	1 out of 2566 0.04%	2 out of 11955 0.02%	1	n-1183
Molecular Function: retinal binding view genes	1 out of 2566 0.04%	2 out of 11955 0.02%	1	all-8763
Molecular Function: sedoheptulose-7-phosphate:D-glyceraldehyde-3-phosphate glyceronetransferase activity view genes	1 out of 2566 0.04%	2 out of 11955 0.02%	1	all-4888
Molecular Function: 3',5'-cyclic-AMP phosphodiesterase activity view genes	1 out of 2566 0.04%	2 out of 11955 0.02%	1	n-61830
Molecular Function: N-acetylglucosamine-1-phosphodiester alpha-N-acetylglucosaminidase activity view genes	1 out of 2566 0.04%	2 out of 11955 0.02%	1	s-47669
Molecular Function: N-(5-amino-5-carboxypentanoyl)-L-cysteinyl-D-valine synthase activity view genes	1 out of 2566 0.04%	2 out of 11955 0.02%	1	all-4574
Molecular Function: carbonyl reductase (NADPH) activity view genes	1 out of 2566 0.04%	2 out of 11955 0.02%	1	s-33405
Molecular Function: lipid phosphatase activity view genes	1 out of 2566 0.04%	2 out of 11955 0.02%	1	all-3392
Molecular Function: nucleotide phosphatase activity view genes	1 out of 2566 0.04%	2 out of 11955 0.02%	1	all-3392
Molecular Function: 3 iron, 4 sulfur cluster binding view genes	1 out of 2566 0.04%	2 out of 11955 0.02%	1	n-11453
Molecular Function: cobalt ion binding view genes	1 out of 2566 0.04%	2 out of 11955 0.02%	1	all-7299
Molecular Function: fructokinase activity view genes	1 out of 2566 0.04%	2 out of 11955 0.02%	1	s-11711
Molecular Function: Rap guanyl-nucleotide exchange factor activity view genes	1 out of 2566 0.04%	2 out of 11955 0.02%	1	all-36951
Molecular Function: calcium-dependent phospholipid binding view genes	1 out of 2566 0.04%	2 out of 11955 0.02%	1	n-54647
Molecular Function: oxo-acid-lyase activity view genes	1 out of 2566 0.04%	2 out of 11955 0.02%	1	n-1190
Molecular Function: 1-pyrroline-5-carboxylate dehydrogenase activity view genes	1 out of 2566 0.04%	2 out of 11955 0.02%	1	n-63437
Molecular Function: sphingomyelin phosphodiesterase activator activity view genes	1 out of 2566 0.04%	2 out of 11955 0.02%	1	n-56072
Molecular Function: electron transporter, transferring electrons from CoQH2-cytochrome c reductase complex and cytochrome c oxidase complex activity view genes	1 out of 2566 0.04%	2 out of 11955 0.02%	1	n-62478
Molecular Function: thyroxine 5'-deiodinase activity view genes	1 out of 2566 0.04%	2 out of 11955 0.02%	1	n-65065
Molecular Function: 4-hydroxyphenylpyruvate dioxygenase activity view genes	1 out of 2566 0.04%	2 out of 11955 0.02%	1	all-10714
Molecular Function: sepiapterin reductase activity view genes	1 out of 2566 0.04%	2 out of 11955 0.02%	1	all-48671
Molecular Function: phosphoglycerate mutase activity view genes	1 out of 2566 0.04%	2 out of 11955 0.02%	1	n-7095
Molecular Function: SET domain binding view genes	1 out of 2566 0.04%	2 out of 11955 0.02%	1	n-251
Molecular Function: benzodiazepine receptor activity view genes	1 out of 2566 0.04%	2 out of 11955 0.02%	1	n-8696
Molecular Function: heme binding view genes	12 out of 2566 0.47%	50 out of 11955 0.42%	1	n-20704, s-53787, s-31024, n-62478, n-19676, all-10352, all-36951, n-6821, all-29016, all-38490, n-21997, s-23716
Molecular Function: flavin adenine dinucleotide binding view genes	18 out of 2566 0.70%	77 out of 11955 0.64%	1	n-20663, n-2641, n-40193, n-2170, all-7037, n-51778, all-2634, n-6455, all-51772, n-36512, n-6775, n-63596, s-37784, all-7267, n-313, s-4107, all-18043, n-58253
Molecular Function: identical protein binding view genes	20 out of 2566 0.78%	87 out of 11955 0.73%	1	n-45259, s-32000, n-34023, n-13896, n-1106, n-20454, n-12907, n-3299, s-8985, s-1550, n-34494, s-31321, n-27298, n-1915, n-9552, n-43593, all-16391, all-13123, n-1378, all-1938
Molecular Function: phospholipase A2 activity view genes	4 out of 2566 0.16%	15 out of 11955 0.13%	1	n-65359, n-53336, s-13486, n-64471
Molecular Function: DNA binding, bending view genes	4 out of 2566 0.16%	15 out of 11955 0.13%	1	s-51939, n-56980, all-3847, n-14277
Molecular Function: extracellular matrix structural constituent view genes	4 out of 2566 0.16%	15 out of 11955 0.13%	1	all-57745, all-67766, n-35326, s-1725
Molecular Function: chaperone binding view genes	4 out of 2566 0.16%	15 out of 11955 0.13%	1	s-32274, n-5874, n-14339, n-20246
Molecular Function: sequence-specific DNA binding transcription factor activity view genes	45 out of 2566 1.75%	202 out of 11955 1.69%	1	all-61453, s-53076, all-1651, s-33485, n-150, n-64520, n-7633, s-18216, n-21997, n-12291, all-5581, n-613, n-6199, all-42163, all-9605, s-48041, n-42803, s-52447, all-10334, n-5430, n-27290, n-13414, all-8763, n-2545, s-22312, s-12026, all-67649, all-37835, all-3896, all-46392, n-64210, n-38655, n-21598, n-14277, n-50430, n-26279, s-51467, n-39216, all-15962, all-32155, all-8585, n-52515, n-4574,…
Molecular Function: ubiquitin-protein ligase activity view genes	34 out of 2566 1.33%	152 out of 11955 1.27%	1	all-18126, all-7944, all-25801, all-29016, all-11246, all-1473, s-53745, all-5661, all-8513, n-17867, s-53286, all-71608, all-18605, s-10864, all-29647, n-63463, all-2195, n-3191, n-8659, n-8641, n-53336, all-71594, s-24805, s-16866, n-14339, all-57826, n-744, all-32352, n-14117, n-2398, n-15737, all-15165, n-31669, n-31748
Molecular Function: amino acid transmembrane transporter activity view genes	11 out of 2566 0.43%	47 out of 11955 0.39%	1	all-18874, all-837, all-69916, all-1236, n-30100, n-120, all-55589, n-59916, all-3788, s-40670, n-2177
Molecular Function: hormone activity view genes	3 out of 2566 0.12%	11 out of 11955 0.09%	1	s-29805, n-33956, all-2848
Molecular Function: acid-amino acid ligase activity view genes	5 out of 2566 0.19%	20 out of 11955 0.17%	1	s-11194, all-11874, all-11246, s-11524, n-8659
Molecular Function: ribonucleoside binding view genes	5 out of 2566 0.19%	20 out of 11955 0.17%	1	all-36328, n-10414, all-38701, all-67493, n-53492
Molecular Function: helicase activity view genes	27 out of 2566 1.05%	121 out of 11955 1.01%	1	all-9072, all-793, s-18818, all-71047, s-14089, n-68, n-28907, all-2327, n-32631, all-46945, n-4734, all-37727, all-18080, all-25346, all-70272, n-62900, all-5871, s-4602, all-6156, all-50077, n-3028, n-24716, all-12093, n-62944, n-49462, n-62798, all-52321
Molecular Function: metalloendopeptidase activity view genes	6 out of 2566 0.23%	25 out of 11955 0.21%	1	n-64869, all-55425, s-8672, n-20454, all-57696, n-63983
Molecular Function: tropomyosin binding view genes	2 out of 2566 0.08%	7 out of 11955 0.06%	1	s-20087, all-1333
Molecular Function: phosphoribosylformylglycinamidine cyclo-ligase activity view genes	2 out of 2566 0.08%	7 out of 11955 0.06%	1	all-3847, s-51939
Molecular Function: phosphoribosylglycinamide formyltransferase activity view genes	2 out of 2566 0.08%	7 out of 11955 0.06%	1	all-3847, s-51939
Molecular Function: cAMP-dependent protein kinase regulator activity view genes	2 out of 2566 0.08%	7 out of 11955 0.06%	1	all-36951, s-21459
Molecular Function: dopamine neurotransmitter receptor activity view genes	2 out of 2566 0.08%	7 out of 11955 0.06%	1	all-13524, all-66867
Molecular Function: beta-N-acetylhexosaminidase activity view genes	2 out of 2566 0.08%	7 out of 11955 0.06%	1	all-71180, s-45587
Molecular Function: signaling pattern recognition receptor activity view genes	2 out of 2566 0.08%	7 out of 11955 0.06%	1	n-16076, all-38430
Molecular Function: nicotinate-nucleotide diphosphorylase (carboxylating) activity view genes	2 out of 2566 0.08%	7 out of 11955 0.06%	1	n-14347, all-66510
Molecular Function: chitin synthase activity view genes	2 out of 2566 0.08%	7 out of 11955 0.06%	1	all-58360, s-25428
Molecular Function: phosphoribosylamine-glycine ligase activity view genes	2 out of 2566 0.08%	7 out of 11955 0.06%	1	all-3847, s-51939
Molecular Function: blue light photoreceptor activity view genes	2 out of 2566 0.08%	7 out of 11955 0.06%	1	n-6455, n-40193
Molecular Function: N-acetyltransferase activity view genes	2 out of 2566 0.08%	7 out of 11955 0.06%	1	s-34879, n-32198
Molecular Function: antioxidant activity view genes	2 out of 2566 0.08%	7 out of 11955 0.06%	1	n-41301, n-36512
Molecular Function: rhodopsin kinase activity view genes	2 out of 2566 0.08%	7 out of 11955 0.06%	1	all-66867, n-45562
Molecular Function: N-acetylmuramoyl-L-alanine amidase activity view genes	2 out of 2566 0.08%	7 out of 11955 0.06%	1	n-1430, all-38430
Molecular Function: osmosensor activity view genes	14 out of 2566 0.55%	62 out of 11955 0.52%	1	all-18874, n-698, all-837, all-17867, all-1236, n-30100, all-3139, all-55589, n-59916, all-775, n-11063, all-3788, all-1922, all-15651
Molecular Function: protein domain specific binding view genes	12 out of 2566 0.47%	53 out of 11955 0.44%	1	n-44317, all-24551, s-54724, n-52515, s-11194, all-7991, all-40866, s-573, s-27923, n-46607, all-70763, n-63907
Molecular Function: Notch binding view genes	7 out of 2566 0.27%	30 out of 11955 0.25%	1	s-51939, s-13971, n-3191, all-15165, all-3847, n-13434, n-2653
Molecular Function: sterol transporter activity view genes	7 out of 2566 0.27%	30 out of 11955 0.25%	1	s-582, all-61436, n-32044, n-11010, all-67190, all-52358, all-10919
Molecular Function: DNA-dependent ATPase activity view genes	7 out of 2566 0.27%	30 out of 11955 0.25%	1	all-20305, s-1944, all-3528, n-36316, n-3316, all-18080, all-54279
Molecular Function: electron carrier activity view genes	13 out of 2566 0.51%	58 out of 11955 0.49%	1	n-20704, n-7766, n-51689, n-6026, n-62478, n-20663, n-19676, all-10352, n-30862, all-36951, s-4107, s-23716, n-11453
Molecular Function: oxidoreductase activity, acting on the aldehyde or oxo group of donors, NAD or NADP as acceptor view genes	8 out of 2566 0.31%	35 out of 11955 0.29%	1	all-4897, all-66257, all-1339, all-3235, s-23913, n-34403, all-3180, n-63437
Molecular Function: cysteine-type endopeptidase activity view genes	8 out of 2566 0.31%	35 out of 11955 0.29%	1	all-52255, s-44993, n-33983, all-7902, n-32433, n-2150, all-71051, all-58508
Molecular Function: phosphatidylinositol-4,5-bisphosphate binding view genes	3 out of 2566 0.12%	12 out of 11955 0.10%	1	s-2408, all-5206, s-15029
Molecular Function: Rho GTPase activator activity view genes	3 out of 2566 0.12%	12 out of 11955 0.10%	1	n-45993, n-65174, all-56522
Molecular Function: hydrolase activity, acting on carbon-nitrogen (but not peptide) bonds, in linear amides view genes	3 out of 2566 0.12%	12 out of 11955 0.10%	1	n-16076, all-7044, n-6050
Molecular Function: transition metal ion binding view genes	3 out of 2566 0.12%	12 out of 11955 0.10%	1	all-70375, all-24783, n-20246
Molecular Function: oxidoreductase activity, acting on the CH-OH group of donors, NAD or NADP as acceptor view genes	12 out of 2566 0.47%	54 out of 11955 0.45%	1	n-1319, n-875, all-56038, n-41720, all-3124, n-7489, n-30277, n-20654, all-32524, n-1221, all-69683, n-521
Molecular Function: transferase activity, transferring acyl groups view genes	10 out of 2566 0.39%	45 out of 11955 0.38%	1	n-8819, all-56038, all-50216, all-4995, all-15837, n-47420, all-71222, n-8362, n-14589, n-53660
Molecular Function: hydrolase activity, acting on ester bonds view genes	4 out of 2566 0.16%	17 out of 11955 0.14%	1	n-64733, all-3924, all-48275, n-65249
Molecular Function: hydro-lyase activity view genes	4 out of 2566 0.16%	17 out of 11955 0.14%	1	all-28156, n-13425, n-26439, n-53331
Molecular Function: receptor signaling protein serine/threonine kinase activity view genes	4 out of 2566 0.16%	17 out of 11955 0.14%	1	n-11796, s-22312, s-20280, all-7991
Molecular Function: L-iditol 2-dehydrogenase activity view genes	1 out of 2566 0.04%	3 out of 11955 0.03%	1	n-1221
Molecular Function: L-malate dehydrogenase activity view genes	1 out of 2566 0.04%	3 out of 11955 0.03%	1	n-65331
Molecular Function: glycerol-3-phosphate oxidase activity view genes	1 out of 2566 0.04%	3 out of 11955 0.03%	1	n-25637
Molecular Function: protein binding, bridging view genes	1 out of 2566 0.04%	3 out of 11955 0.03%	1	all-8572
Molecular Function: inositol oxygenase activity view genes	1 out of 2566 0.04%	3 out of 11955 0.03%	1	n-210
Molecular Function: histone-arginine N-methyltransferase activity view genes	1 out of 2566 0.04%	3 out of 11955 0.03%	1	all-2461
Molecular Function: RNA methyltransferase activity view genes	1 out of 2566 0.04%	3 out of 11955 0.03%	1	all-1187
Molecular Function: organic phosphonate transmembrane-transporting ATPase activity view genes	1 out of 2566 0.04%	3 out of 11955 0.03%	1	n-7766
Molecular Function: lamin binding view genes	1 out of 2566 0.04%	3 out of 11955 0.03%	1	n-18294
Molecular Function: translation release factor activity view genes	1 out of 2566 0.04%	3 out of 11955 0.03%	1	s-28047
Molecular Function: protein tag view genes	1 out of 2566 0.04%	3 out of 11955 0.03%	1	all-29647
Molecular Function: N6-(1,2-dicarboxyethyl)AMP AMP-lyase (fumarate-forming) activity view genes	1 out of 2566 0.04%	3 out of 11955 0.03%	1	s-6643
Molecular Function: protoheme IX farnesyltransferase activity view genes	1 out of 2566 0.04%	3 out of 11955 0.03%	1	all-15205
Molecular Function: inositol-1,4,5-trisphosphate 3-kinase activity view genes	1 out of 2566 0.04%	3 out of 11955 0.03%	1	all-71784
Molecular Function: methylenetetrahydrofolate dehydrogenase (NADP+) activity view genes	1 out of 2566 0.04%	3 out of 11955 0.03%	1	n-509
Molecular Function: (S)-2-(5-amino-1-(5-phospho-D-ribosyl)imidazole-4-carboxamido)succinate AMP-lyase (fumarate-forming) activity view genes	1 out of 2566 0.04%	3 out of 11955 0.03%	1	s-6643
Molecular Function: 2-methyleneglutarate mutase activity view genes	1 out of 2566 0.04%	3 out of 11955 0.03%	1	n-857
Molecular Function: inorganic cation transmembrane transporter activity view genes	1 out of 2566 0.04%	3 out of 11955 0.03%	1	s-53686
Molecular Function: histone demethylase activity (H3-K9 specific) view genes	1 out of 2566 0.04%	3 out of 11955 0.03%	1	all-27738
Molecular Function: glycerone-phosphate O-acyltransferase activity view genes	1 out of 2566 0.04%	3 out of 11955 0.03%	1	all-26639
Molecular Function: ornithine-oxo-acid transaminase activity view genes	1 out of 2566 0.04%	3 out of 11955 0.03%	1	n-10253
Molecular Function: pyrophosphatase activity view genes	1 out of 2566 0.04%	3 out of 11955 0.03%	1	all-13994
Molecular Function: phosphatidylinositol phosphate binding view genes	1 out of 2566 0.04%	3 out of 11955 0.03%	1	n-5000
Molecular Function: ligand-gated ion channel activity view genes	1 out of 2566 0.04%	3 out of 11955 0.03%	1	n-65288
Molecular Function: isocitrate dehydrogenase (NADP+) activity view genes	1 out of 2566 0.04%	3 out of 11955 0.03%	1	n-3967
Molecular Function: rRNA (adenine-N6,N6-)-dimethyltransferase activity view genes	1 out of 2566 0.04%	3 out of 11955 0.03%	1	n-9550
Molecular Function: 1-phosphatidylinositol-4-phosphate 3-kinase activity view genes	1 out of 2566 0.04%	3 out of 11955 0.03%	1	all-5412
Molecular Function: selenium binding view genes	1 out of 2566 0.04%	3 out of 11955 0.03%	1	n-10709
Molecular Function: uroporphyrinogen decarboxylase activity view genes	1 out of 2566 0.04%	3 out of 11955 0.03%	1	s-11029
Molecular Function: ATPase activity, coupled to transmembrane movement of ions, rotational mechanism view genes	1 out of 2566 0.04%	3 out of 11955 0.03%	1	n-32045
Molecular Function: dipeptidase activity view genes	1 out of 2566 0.04%	3 out of 11955 0.03%	1	all-17481
Molecular Function: histidine-tRNA ligase activity view genes	1 out of 2566 0.04%	3 out of 11955 0.03%	1	all-3031
Molecular Function: urocanate hydratase activity view genes	1 out of 2566 0.04%	3 out of 11955 0.03%	1	all-16678
Molecular Function: small molecule binding view genes	1 out of 2566 0.04%	3 out of 11955 0.03%	1	s-51314
Molecular Function: recombinase activity view genes	1 out of 2566 0.04%	3 out of 11955 0.03%	1	s-1944
Molecular Function: small protein activating enzyme activity view genes	1 out of 2566 0.04%	3 out of 11955 0.03%	1	s-12926
Molecular Function: dihydrolipoyl dehydrogenase activity view genes	1 out of 2566 0.04%	3 out of 11955 0.03%	1	n-36512
Molecular Function: guanylate kinase activity view genes	1 out of 2566 0.04%	3 out of 11955 0.03%	1	all-2145
Molecular Function: GDP-4-dehydro-D-rhamnose reductase activity view genes	1 out of 2566 0.04%	3 out of 11955 0.03%	1	n-249
Molecular Function: cyclosporin A binding view genes	1 out of 2566 0.04%	3 out of 11955 0.03%	1	s-11631
Molecular Function: chromatin DNA binding view genes	1 out of 2566 0.04%	3 out of 11955 0.03%	1	n-18294
Molecular Function: hydrolase activity, hydrolyzing N-glycosyl compounds view genes	1 out of 2566 0.04%	3 out of 11955 0.03%	1	n-6037
Molecular Function: aminoacyl-tRNA hydrolase activity view genes	1 out of 2566 0.04%	3 out of 11955 0.03%	1	all-22096
Molecular Function: regulatory region DNA binding view genes	1 out of 2566 0.04%	3 out of 11955 0.03%	1	all-18080
Molecular Function: 2-methylcitrate dehydratase activity view genes	1 out of 2566 0.04%	3 out of 11955 0.03%	1	all-13624
Molecular Function: myosin II heavy chain binding view genes	1 out of 2566 0.04%	3 out of 11955 0.03%	1	n-53336
Molecular Function: glutamate decarboxylase activity view genes	1 out of 2566 0.04%	3 out of 11955 0.03%	1	all-22058
Molecular Function: 3-hydroxyacyl-CoA dehydrogenase activity view genes	1 out of 2566 0.04%	3 out of 11955 0.03%	1	n-41720
Molecular Function: secondary active sulfate transmembrane transporter activity view genes	1 out of 2566 0.04%	3 out of 11955 0.03%	1	all-22096
Molecular Function: nucleoside diphosphate kinase activity view genes	1 out of 2566 0.04%	3 out of 11955 0.03%	1	n-64907
Molecular Function: coenzyme binding view genes	14 out of 2566 0.55%	64 out of 11955 0.54%	1	s-6250, n-41720, n-38648, n-55383, all-29299, n-7691, n-249, n-64844, n-6775, s-27933, s-51314, all-6604, n-25054, all-1991
Molecular Function: DNA helicase activity view genes	6 out of 2566 0.23%	27 out of 11955 0.23%	1	all-20305, all-3528, n-36316, n-3316, all-1017, n-3687
Molecular Function: histone methyltransferase activity (H3-K36 specific) view genes	2 out of 2566 0.08%	8 out of 11955 0.07%	1	n-57816, all-44245
Molecular Function: RNA-dependent ATPase activity view genes	2 out of 2566 0.08%	8 out of 11955 0.07%	1	all-36262, all-53108
Molecular Function: RNA polymerase II transcription coactivator activity view genes	2 out of 2566 0.08%	8 out of 11955 0.07%	1	all-7727, n-7469
Molecular Function: NAD+ binding view genes	2 out of 2566 0.08%	8 out of 11955 0.07%	1	n-41720, all-7044
Molecular Function: corazonin receptor binding view genes	2 out of 2566 0.08%	8 out of 11955 0.07%	1	all-71848, all-25771
Molecular Function: histone deacetylase activity view genes	2 out of 2566 0.08%	8 out of 11955 0.07%	1	s-21123, s-3732
Molecular Function: peptidoglycan binding view genes	2 out of 2566 0.08%	8 out of 11955 0.07%	1	n-1430, all-38430
Molecular Function: 6-phosphofructokinase activity view genes	2 out of 2566 0.08%	8 out of 11955 0.07%	1	n-39065, all-34383
Molecular Function: structural constituent of cuticle view genes	2 out of 2566 0.08%	8 out of 11955 0.07%	1	all-57745, all-8693
Molecular Function: transferase activity, transferring one-carbon groups view genes	2 out of 2566 0.08%	8 out of 11955 0.07%	1	n-54618, all-5980
Molecular Function: amino acid binding view genes	2 out of 2566 0.08%	8 out of 11955 0.07%	1	n-63428, n-21949
Molecular Function: scavenger receptor activity view genes	3 out of 2566 0.12%	13 out of 11955 0.11%	1	n-62628, all-6160, n-63449
Molecular Function: 2 iron, 2 sulfur cluster binding view genes	3 out of 2566 0.12%	13 out of 11955 0.11%	1	all-13624, n-5720, n-11453
Molecular Function: cofactor binding view genes	4 out of 2566 0.16%	18 out of 11955 0.15%	1	n-875, n-47028, n-37028, n-63948
Molecular Function: myosin binding view genes	6 out of 2566 0.23%	28 out of 11955 0.23%	1	n-61961, all-63068, all-10276, n-63639, all-15070, all-34491
Molecular Function: chromatin binding view genes	18 out of 2566 0.70%	86 out of 11955 0.72%	1	s-32274, all-54279, s-18818, all-1017, all-5102, s-53337, s-52229, n-3316, n-63915, all-18080, all-25346, all-20305, n-20246, n-48974, n-54618, all-6596, n-36041, n-3687
Molecular Function: Wnt-protein binding view genes	3 out of 2566 0.12%	14 out of 11955 0.12%	1	all-18, all-58508, n-41352
Molecular Function: tRNA binding view genes	3 out of 2566 0.12%	14 out of 11955 0.12%	1	s-2448, n-50441, n-31915
Molecular Function: double-stranded RNA binding view genes	2 out of 2566 0.08%	9 out of 11955 0.08%	1	all-64706, s-3923
Molecular Function: ecdysteroid 25-hydroxylase activity view genes	2 out of 2566 0.08%	9 out of 11955 0.08%	1	s-32274, n-20246
Molecular Function: myosin heavy chain binding view genes	2 out of 2566 0.08%	9 out of 11955 0.08%	1	all-3161, n-58430
Molecular Function: xenobiotic-transporting ATPase activity view genes	2 out of 2566 0.08%	9 out of 11955 0.08%	1	n-27946, n-46081
Molecular Function: prothoracicotrophic hormone activity view genes	2 out of 2566 0.08%	9 out of 11955 0.08%	1	s-32274, n-20246
Molecular Function: structural constituent of eye lens view genes	2 out of 2566 0.08%	9 out of 11955 0.08%	1	n-40193, n-6455
Molecular Function: single-stranded RNA binding view genes	2 out of 2566 0.08%	9 out of 11955 0.08%	1	n-18788, n-21260
Molecular Function: palmitoyl-(protein) hydrolase activity view genes	1 out of 2566 0.04%	4 out of 11955 0.03%	1	all-22846
Molecular Function: NEDD8 ligase activity view genes	1 out of 2566 0.04%	4 out of 11955 0.03%	1	n-31669
Molecular Function: microtubule plus-end binding view genes	1 out of 2566 0.04%	4 out of 11955 0.03%	1	s-52486
Molecular Function: heparan sulfate 6-O-sulfotransferase activity view genes	1 out of 2566 0.04%	4 out of 11955 0.03%	1	n-64353
Molecular Function: GDP-L-fucose synthase activity view genes	1 out of 2566 0.04%	4 out of 11955 0.03%	1	n-249
Molecular Function: arginine-tRNA ligase activity view genes	1 out of 2566 0.04%	4 out of 11955 0.03%	1	n-770
Molecular Function: monocarboxylic acid transmembrane transporter activity view genes	1 out of 2566 0.04%	4 out of 11955 0.03%	1	s-42470
Molecular Function: alkaline phosphatase activity view genes	1 out of 2566 0.04%	4 out of 11955 0.03%	1	n-43603
Molecular Function: voltage-gated ion channel activity view genes	1 out of 2566 0.04%	4 out of 11955 0.03%	1	all-2866
Molecular Function: glutamate-cysteine ligase activity view genes	1 out of 2566 0.04%	4 out of 11955 0.03%	1	n-1488
Molecular Function: GDP binding view genes	1 out of 2566 0.04%	4 out of 11955 0.03%	1	n-47331
Molecular Function: D-aspartate oxidase activity view genes	1 out of 2566 0.04%	4 out of 11955 0.03%	1	n-63948
Molecular Function: molybdopterin cofactor binding view genes	1 out of 2566 0.04%	4 out of 11955 0.03%	1	s-23716
Molecular Function: dTDP-glucose 4,6-dehydratase activity view genes	1 out of 2566 0.04%	4 out of 11955 0.03%	1	n-25054
Molecular Function: peptide alpha-N-acetyltransferase activity view genes	1 out of 2566 0.04%	4 out of 11955 0.03%	1	n-18008
Molecular Function: myosin II light chain binding view genes	1 out of 2566 0.04%	4 out of 11955 0.03%	1	n-53336
Molecular Function: ion transmembrane transporter activity view genes	1 out of 2566 0.04%	4 out of 11955 0.03%	1	n-45067
Molecular Function: dynein binding view genes	1 out of 2566 0.04%	4 out of 11955 0.03%	1	all-1221
Molecular Function: oxidoreductase activity, acting on the aldehyde or oxo group of donors, disulfide as acceptor view genes	1 out of 2566 0.04%	4 out of 11955 0.03%	1	n-55367
Molecular Function: ligase activity, forming aminoacyl-tRNA and related compounds view genes	1 out of 2566 0.04%	4 out of 11955 0.03%	1	n-63162
Molecular Function: cytidylate kinase activity view genes	1 out of 2566 0.04%	4 out of 11955 0.03%	1	n-63296
Molecular Function: glycogen phosphorylase activity view genes	1 out of 2566 0.04%	4 out of 11955 0.03%	1	n-16405
Molecular Function: carbohydrate kinase activity view genes	1 out of 2566 0.04%	4 out of 11955 0.03%	1	all-11802
Molecular Function: polysaccharide binding view genes	1 out of 2566 0.04%	4 out of 11955 0.03%	1	all-37183
Molecular Function: argininosuccinate synthase activity view genes	1 out of 2566 0.04%	4 out of 11955 0.03%	1	n-10623
Molecular Function: pre-mRNA intronic binding view genes	1 out of 2566 0.04%	4 out of 11955 0.03%	1	n-68
Molecular Function: AT DNA binding view genes	1 out of 2566 0.04%	4 out of 11955 0.03%	1	n-56980
Molecular Function: polyamine-transporting ATPase activity view genes	1 out of 2566 0.04%	4 out of 11955 0.03%	1	n-2999
Molecular Function: translation regulator activity view genes	1 out of 2566 0.04%	4 out of 11955 0.03%	1	s-3923
Molecular Function: quinone binding view genes	1 out of 2566 0.04%	4 out of 11955 0.03%	1	all-14788
Molecular Function: phosphorylase kinase regulator activity view genes	1 out of 2566 0.04%	4 out of 11955 0.03%	1	all-1757
Molecular Function: branched-chain-amino-acid transaminase activity view genes	1 out of 2566 0.04%	4 out of 11955 0.03%	1	n-4135
Molecular Function: alanine-glyoxylate transaminase activity view genes	1 out of 2566 0.04%	4 out of 11955 0.03%	1	n-5053
Molecular Function: RNA polymerase II distal enhancer sequence-specific DNA binding transcription factor activity view genes	30 out of 2566 1.17%	145 out of 11955 1.21%	1	n-6853, all-71373, all-14350, n-3938, n-21997, all-17023, s-53787, all-3847, s-25381, n-50, s-52447, all-57094, all-34124, n-19317, all-48671, all-10565, all-8146, n-50430, s-22308, s-51939, n-6618, n-39216, n-14062, all-7727, n-52515, n-4574, s-22035, n-38619, n-24241, all-45922
Molecular Function: calmodulin binding view genes	16 out of 2566 0.62%	78 out of 11955 0.65%	1	all-6262, n-45562, s-16651, all-51251, s-181, all-7137, n-63007, n-63292, n-3855, all-5789, s-35733, n-19770, all-49335, n-329, n-54102, all-71784
Molecular Function: oxidoreductase activity, acting on paired donors, with incorporation or reduction of molecular oxygen view genes	10 out of 2566 0.39%	49 out of 11955 0.41%	1	n-20704, s-16333, all-65914, n-19676, all-10352, all-36951, all-379, n-833, all-45847, n-64087
Molecular Function: iron ion binding view genes	13 out of 2566 0.51%	64 out of 11955 0.54%	1	n-20704, all-59313, n-62478, n-19676, all-36951, n-210, n-102, n-63428, all-53318, n-48886, n-55383, all-10352, all-7267
Molecular Function: carbohydrate binding view genes	15 out of 2566 0.58%	74 out of 11955 0.62%	1	all-11004, n-43878, s-54235, all-476, n-4145, all-452, all-64322, s-5608, all-61124, all-11867, n-43621, all-23397, all-63243, n-1325, all-597
Molecular Function: extracellular ligand-gated ion channel activity view genes	5 out of 2566 0.19%	25 out of 11955 0.21%	1	n-64851, all-56554, n-19035, n-5368, all-4989
Molecular Function: RNA polymerase II regulatory region sequence-specific DNA binding view genes	9 out of 2566 0.35%	45 out of 11955 0.38%	1	n-63001, all-6156, n-51008, all-1651, n-54618, n-36316, n-1938, n-21997, all-18080
Molecular Function: FMN binding view genes	3 out of 2566 0.12%	15 out of 11955 0.13%	1	all-7267, all-10486, n-55383
Molecular Function: microtubule-severing ATPase activity view genes	2 out of 2566 0.08%	10 out of 11955 0.08%	1	n-12907, n-12286
Molecular Function: ecdysteroid hormone receptor activity view genes	2 out of 2566 0.08%	10 out of 11955 0.08%	1	all-35770, all-8763
Molecular Function: bitter taste receptor activity view genes	2 out of 2566 0.08%	10 out of 11955 0.08%	1	n-37630, n-157
Molecular Function: transcription corepressor activity view genes	2 out of 2566 0.08%	10 out of 11955 0.08%	1	n-10830, n-34626
Molecular Function: S-methyltransferase activity view genes	2 out of 2566 0.08%	10 out of 11955 0.08%	1	all-401, n-43996
Molecular Function: serine-type endopeptidase inhibitor activity view genes	2 out of 2566 0.08%	10 out of 11955 0.08%	1	s-27176, n-53067
Molecular Function: DNA photolyase activity view genes	2 out of 2566 0.08%	10 out of 11955 0.08%	1	n-40193, n-6455
Molecular Function: phosphoprotein binding view genes	2 out of 2566 0.08%	10 out of 11955 0.08%	1	n-57816, all-44245
Molecular Function: mRNA 3'-UTR binding view genes	9 out of 2566 0.35%	46 out of 11955 0.38%	1	s-51939, all-3847, n-19317, n-38655, n-47374, n-63639, n-18788, all-17023, n-63788
Molecular Function: lyase activity view genes	9 out of 2566 0.35%	46 out of 11955 0.38%	1	n-41425, n-22532, all-59709, n-6455, all-70760, s-6643, all-10618, n-58640, n-43930
Molecular Function: enzyme binding view genes	6 out of 2566 0.23%	31 out of 11955 0.26%	1	n-62845, s-51939, n-2476, n-32631, n-2321, all-71230
Molecular Function: nuclease activity view genes	6 out of 2566 0.23%	31 out of 11955 0.26%	1	n-227, all-23584, all-71844, n-48974, n-6230, n-17694
Molecular Function: cAMP-dependent protein kinase activity view genes	5 out of 2566 0.19%	26 out of 11955 0.22%	1	s-17632, s-28159, all-2223, all-36951, n-56202
Molecular Function: peroxidase activity view genes	5 out of 2566 0.19%	26 out of 11955 0.22%	1	all-61436, all-27502, n-7650, n-10711, n-18017
Molecular Function: Ran GTPase binding view genes	5 out of 2566 0.19%	26 out of 11955 0.22%	1	all-60278, n-25959, n-62781, n-46159, n-11701
Molecular Function: purine ribonucleoside triphosphate binding view genes	4 out of 2566 0.16%	21 out of 11955 0.18%	1	n-63817, n-7270, s-23701, all-4735
Molecular Function: purine ribonucleotide binding view genes	4 out of 2566 0.16%	21 out of 11955 0.18%	1	n-63817, n-7270, s-23701, all-4735
Molecular Function: receptor binding view genes	3 out of 2566 0.12%	16 out of 11955 0.13%	1	all-71848, n-14425, n-54618
Molecular Function: cyclin-dependent protein serine/threonine kinase activity view genes	3 out of 2566 0.12%	16 out of 11955 0.13%	1	all-70479, n-40787, n-65251
Molecular Function: ligase activity view genes	30 out of 2566 1.17%	150 out of 11955 1.25%	1	n-63377, n-13044, s-11194, all-5458, s-29282, n-1488, n-6948, all-5661, all-51356, all-3004, all-29742, n-7514, all-59605, all-6581, n-509, n-25458, n-329, all-5980, s-24805, all-1055, n-21949, all-13740, n-9166, n-9275, n-35308, n-7270, s-12926, s-11524, n-7389, all-5365
Molecular Function: protein-hormone receptor activity view genes	1 out of 2566 0.04%	5 out of 11955 0.04%	1	n-18515
Molecular Function: adenosine deaminase activity view genes	1 out of 2566 0.04%	5 out of 11955 0.04%	1	all-67649
Molecular Function: DNA (cytosine-5-)-methyltransferase activity view genes	1 out of 2566 0.04%	5 out of 11955 0.04%	1	n-18268
Molecular Function: fumarate hydratase activity view genes	1 out of 2566 0.04%	5 out of 11955 0.04%	1	all-4045
Molecular Function: 3'-5' exonuclease activity view genes	1 out of 2566 0.04%	5 out of 11955 0.04%	1	n-12902
Molecular Function: metalloexopeptidase activity view genes	1 out of 2566 0.04%	5 out of 11955 0.04%	1	n-17017
Molecular Function: [acyl-carrier-protein] S-malonyltransferase activity view genes	1 out of 2566 0.04%	5 out of 11955 0.04%	1	all-61400
Molecular Function: pseudouridine synthase activity view genes	1 out of 2566 0.04%	5 out of 11955 0.04%	1	n-2199
Molecular Function: RNA polymerase II activating transcription factor binding view genes	1 out of 2566 0.04%	5 out of 11955 0.04%	1	all-7727
Molecular Function: transferase activity, transferring pentosyl groups view genes	1 out of 2566 0.04%	5 out of 11955 0.04%	1	n-1054
Molecular Function: glutamate synthase (NADH) activity view genes	1 out of 2566 0.04%	5 out of 11955 0.04%	1	all-7267
Molecular Function: gap junction channel activity view genes	1 out of 2566 0.04%	5 out of 11955 0.04%	1	all-6643
Molecular Function: carboxypeptidase activity view genes	1 out of 2566 0.04%	5 out of 11955 0.04%	1	s-44014
Molecular Function: N-methyl-D-aspartate selective glutamate receptor activity view genes	1 out of 2566 0.04%	5 out of 11955 0.04%	1	n-34155
Molecular Function: DNA ligase (ATP) activity view genes	1 out of 2566 0.04%	5 out of 11955 0.04%	1	n-62860
Molecular Function: 3-oxoacyl-[acyl-carrier-protein] reductase (NADPH) activity view genes	1 out of 2566 0.04%	5 out of 11955 0.04%	1	all-61400
Molecular Function: protein kinase A binding view genes	1 out of 2566 0.04%	5 out of 11955 0.04%	1	all-22391
Molecular Function: calcium:sodium antiporter activity view genes	1 out of 2566 0.04%	5 out of 11955 0.04%	1	s-38462
Molecular Function: myristoyl-[acyl-carrier-protein] hydrolase activity view genes	1 out of 2566 0.04%	5 out of 11955 0.04%	1	all-61400
Molecular Function: cytochrome-c oxidase activity view genes	1 out of 2566 0.04%	5 out of 11955 0.04%	1	all-2002
Molecular Function: [acyl-carrier-protein] S-acetyltransferase activity view genes	1 out of 2566 0.04%	5 out of 11955 0.04%	1	all-61400
Molecular Function: poly(A)-specific ribonuclease activity view genes	1 out of 2566 0.04%	5 out of 11955 0.04%	1	n-40204
Molecular Function: deoxyribodipyrimidine photo-lyase activity view genes	1 out of 2566 0.04%	5 out of 11955 0.04%	1	n-40193
Molecular Function: enoyl-[acyl-carrier-protein] reductase (NADPH, B-specific) activity view genes	1 out of 2566 0.04%	5 out of 11955 0.04%	1	all-61400
Molecular Function: lipid transporter activity view genes	1 out of 2566 0.04%	5 out of 11955 0.04%	1	n-260
Molecular Function: mannosyl-oligosaccharide 1,2-alpha-mannosidase activity view genes	1 out of 2566 0.04%	5 out of 11955 0.04%	1	all-13857
Molecular Function: oxidoreductase activity, acting on NAD(P)H view genes	1 out of 2566 0.04%	5 out of 11955 0.04%	1	n-6026
Molecular Function: 3-hydroxypalmitoyl-[acyl-carrier-protein] dehydratase activity view genes	1 out of 2566 0.04%	5 out of 11955 0.04%	1	all-61400
Molecular Function: 3',5'-cyclic-GMP phosphodiesterase activity view genes	1 out of 2566 0.04%	5 out of 11955 0.04%	1	s-17551
Molecular Function: protein-glycine ligase activity view genes	1 out of 2566 0.04%	5 out of 11955 0.04%	1	all-9647
Molecular Function: sugar transmembrane transporter activity view genes	1 out of 2566 0.04%	5 out of 11955 0.04%	1	all-5755
Molecular Function: purine nucleotide binding view genes	1 out of 2566 0.04%	5 out of 11955 0.04%	1	all-7306
Molecular Function: CTP synthase activity view genes	1 out of 2566 0.04%	5 out of 11955 0.04%	1	n-3687
Molecular Function: omega peptidase activity view genes	1 out of 2566 0.04%	5 out of 11955 0.04%	1	n-4433
Molecular Function: oleoyl-[acyl-carrier-protein] hydrolase activity view genes	1 out of 2566 0.04%	5 out of 11955 0.04%	1	all-61400
Molecular Function: ligase activity, forming carbon-nitrogen bonds view genes	1 out of 2566 0.04%	5 out of 11955 0.04%	1	n-54618
Molecular Function: beta-1,4-N-acetylgalactosaminyltransferase activity view genes	1 out of 2566 0.04%	5 out of 11955 0.04%	1	all-70587
Molecular Function: transforming growth factor beta receptor, pathway-specific cytoplasmic mediator activity view genes	1 out of 2566 0.04%	5 out of 11955 0.04%	1	all-7727
Molecular Function: protein-arginine omega-N asymmetric methyltransferase activity view genes	1 out of 2566 0.04%	5 out of 11955 0.04%	1	all-2461
Molecular Function: phosphatidylinositol phosphate kinase activity view genes	1 out of 2566 0.04%	5 out of 11955 0.04%	1	n-11582
Molecular Function: armadillo repeat domain binding view genes	1 out of 2566 0.04%	5 out of 11955 0.04%	1	all-35770
Molecular Function: protein-arginine omega-N monomethyltransferase activity view genes	1 out of 2566 0.04%	5 out of 11955 0.04%	1	all-2461
Molecular Function: palmitoyl-[acyl-carrier-protein] hydrolase activity view genes	1 out of 2566 0.04%	5 out of 11955 0.04%	1	all-61400
Molecular Function: actin-dependent ATPase activity view genes	8 out of 2566 0.31%	42 out of 11955 0.35%	1	all-36507, s-51939, s-36633, n-46081, all-3847, s-24163, s-34889, all-6644
Molecular Function: metallopeptidase activity view genes	7 out of 2566 0.27%	37 out of 11955 0.31%	1	all-55425, s-1550, s-3881, n-54000, all-17481, all-1938, n-62266
Molecular Function: translation elongation factor activity view genes	6 out of 2566 0.23%	32 out of 11955 0.27%	1	n-15492, s-32356, all-8392, n-63060, n-38377, all-4165
Molecular Function: acetyl-CoA carboxylase activity view genes	2 out of 2566 0.08%	11 out of 11955 0.09%	1	all-54577, all-69789
Molecular Function: alpha-glucosidase activity view genes	2 out of 2566 0.08%	11 out of 11955 0.09%	1	s-51939, s-53787
Molecular Function: protein tyrosine/serine/threonine phosphatase activity view genes	2 out of 2566 0.08%	11 out of 11955 0.09%	1	n-63251, all-59985
Molecular Function: Ras GTPase activator activity view genes	2 out of 2566 0.08%	11 out of 11955 0.09%	1	all-8660, all-57782
Molecular Function: cell adhesion molecule binding view genes	2 out of 2566 0.08%	11 out of 11955 0.09%	1	all-51775, n-32876
Molecular Function: purine ribonucleoside binding view genes	4 out of 2566 0.16%	22 out of 11955 0.18%	1	n-63817, n-7270, s-23701, all-4735
Molecular Function: RNA polymerase II transcription cofactor activity view genes	7 out of 2566 0.27%	38 out of 11955 0.32%	1	n-13312, n-63326, all-20403, n-4268, n-35615, all-27784, n-290
Molecular Function: ARF guanyl-nucleotide exchange factor activity view genes	3 out of 2566 0.12%	17 out of 11955 0.14%	1	all-70111, n-62867, s-34317
Molecular Function: phosphatase activity view genes	12 out of 2566 0.47%	64 out of 11955 0.54%	1	n-31411, all-25771, n-45506, s-31161, s-24163, n-57400, n-26074, n-18699, all-50902, n-62711, n-13362, all-3914
Molecular Function: JUN kinase binding view genes	2 out of 2566 0.08%	12 out of 11955 0.10%	1	n-54513, n-4012
Molecular Function: octopamine receptor activity view genes	2 out of 2566 0.08%	12 out of 11955 0.10%	1	all-31261, all-4586
Molecular Function: core promoter binding view genes	2 out of 2566 0.08%	12 out of 11955 0.10%	1	s-32274, n-20246
Molecular Function: NAD-dependent histone deacetylase activity (H3-K9 specific) view genes	1 out of 2566 0.04%	6 out of 11955 0.05%	1	n-34626
Molecular Function: 3-oxoacyl-[acyl-carrier-protein] synthase activity view genes	1 out of 2566 0.04%	6 out of 11955 0.05%	1	all-61400
Molecular Function: NAD-dependent histone deacetylase activity (H3-K18 specific) view genes	1 out of 2566 0.04%	6 out of 11955 0.05%	1	n-34626
Molecular Function: serotonin receptor activity view genes	1 out of 2566 0.04%	6 out of 11955 0.05%	1	all-4586
Molecular Function: acetylglucosaminyltransferase activity view genes	1 out of 2566 0.04%	6 out of 11955 0.05%	1	all-70534
Molecular Function: oxidoreductase activity, acting on single donors with incorporation of molecular oxygen, incorporation of two atoms of oxygen view genes	1 out of 2566 0.04%	6 out of 11955 0.05%	1	all-53318
Molecular Function: MAP kinase kinase activity view genes	1 out of 2566 0.04%	6 out of 11955 0.05%	1	all-6962
Molecular Function: m7G(5')pppN diphosphatase activity view genes	1 out of 2566 0.04%	6 out of 11955 0.05%	1	n-2150
Molecular Function: phosphorelay sensor kinase activity view genes	1 out of 2566 0.04%	6 out of 11955 0.05%	1	all-53954
Molecular Function: glycerol-3-phosphate dehydrogenase activity view genes	1 out of 2566 0.04%	6 out of 11955 0.05%	1	n-25637
Molecular Function: neuropeptide receptor activity view genes	1 out of 2566 0.04%	6 out of 11955 0.05%	1	all-66867
Molecular Function: dopamine neurotransmitter receptor activity, coupled via Gs view genes	1 out of 2566 0.04%	6 out of 11955 0.05%	1	all-4586
Molecular Function: extracellular-glutamate-gated ion channel activity view genes	1 out of 2566 0.04%	6 out of 11955 0.05%	1	n-34155
Molecular Function: protein phosphatase 1 binding view genes	1 out of 2566 0.04%	6 out of 11955 0.05%	1	n-157
Molecular Function: oxygen sensor activity view genes	1 out of 2566 0.04%	6 out of 11955 0.05%	1	all-4735
Molecular Function: NAD-dependent histone deacetylase activity (H4-K16 specific) view genes	1 out of 2566 0.04%	6 out of 11955 0.05%	1	n-34626
Molecular Function: TBP-class protein binding RNA polymerase II transcription factor activity involved in preinitiation complex assembly view genes	1 out of 2566 0.04%	6 out of 11955 0.05%	1	n-25620
Molecular Function: pre-miRNA binding view genes	1 out of 2566 0.04%	6 out of 11955 0.05%	1	all-59955
Molecular Function: CoA hydrolase activity view genes	1 out of 2566 0.04%	6 out of 11955 0.05%	1	s-44488
Molecular Function: NAD-dependent histone deacetylase activity (H3-K14 specific) view genes	1 out of 2566 0.04%	6 out of 11955 0.05%	1	n-34626
Molecular Function: metal ion transmembrane transporter activity view genes	1 out of 2566 0.04%	6 out of 11955 0.05%	1	s-53686
Molecular Function: transcription regulatory region sequence-specific DNA binding view genes	6 out of 2566 0.23%	34 out of 11955 0.28%	1	all-67649, all-35770, s-52447, all-10334, n-50430, all-8763
Molecular Function: phosphoric diester hydrolase activity view genes	3 out of 2566 0.12%	18 out of 11955 0.15%	1	n-7585, s-38585, s-14930
Molecular Function: histone-lysine N-methyltransferase activity view genes	3 out of 2566 0.12%	18 out of 11955 0.15%	1	n-8318, s-43699, all-44245
Molecular Function: cation-transporting ATPase activity view genes	5 out of 2566 0.19%	29 out of 11955 0.24%	1	n-613, s-53686, n-32045, s-44765, all-59064
Molecular Function: cation transmembrane transporter activity view genes	7 out of 2566 0.27%	40 out of 11955 0.33%	1	all-69916, all-58407, all-59064, n-120, all-5658, all-175, all-56397
Molecular Function: transferase activity, transferring glycosyl groups view genes	12 out of 2566 0.47%	66 out of 11955 0.55%	1	n-8695, all-3025, s-6250, n-2653, n-1266, all-70811, all-6770, s-53686, all-7747, all-7954, s-3400, all-12395
Molecular Function: nucleosome-dependent ATPase activity view genes	4 out of 2566 0.16%	24 out of 11955 0.20%	1	all-20305, n-36316, n-3316, all-54279
Molecular Function: transmembrane signaling receptor activity view genes	4 out of 2566 0.16%	24 out of 11955 0.20%	1	all-61436, n-7029, all-18, n-41352
Molecular Function: guanyl-nucleotide exchange factor activity view genes	4 out of 2566 0.16%	24 out of 11955 0.20%	1	n-51226, n-2136, all-56522, all-13510
Molecular Function: DNA topoisomerase activity view genes	13 out of 2566 0.51%	72 out of 11955 0.60%	1	n-6853, n-63407, n-3938, all-728, all-5243, n-6618, n-36254, n-14062, all-27759, all-19631, n-59272, n-24241, all-45922
Molecular Function: cyclin-dependent protein serine/threonine kinase regulator activity view genes	2 out of 2566 0.08%	13 out of 11955 0.11%	1	n-35001, all-48363
Molecular Function: beta-catenin binding view genes	2 out of 2566 0.08%	13 out of 11955 0.11%	1	n-6613, n-39928
Molecular Function: exonuclease activity view genes	2 out of 2566 0.08%	13 out of 11955 0.11%	1	s-34882, n-7763
Molecular Function: adenyl nucleotide binding view genes	2 out of 2566 0.08%	13 out of 11955 0.11%	1	n-53081, s-53446
Molecular Function: aspartic-type endopeptidase activity view genes	2 out of 2566 0.08%	13 out of 11955 0.11%	1	s-9877, s-55092
Molecular Function: diacylglycerol binding view genes	2 out of 2566 0.08%	13 out of 11955 0.11%	1	s-17632, s-47506
Molecular Function: oxoglutarate dehydrogenase (succinyl-transferring) activity view genes	1 out of 2566 0.04%	7 out of 11955 0.06%	1	n-2417
Molecular Function: trehalose transmembrane transporter activity view genes	1 out of 2566 0.04%	7 out of 11955 0.06%	1	all-51786
Molecular Function: hormone binding view genes	1 out of 2566 0.04%	7 out of 11955 0.06%	1	all-8939
Molecular Function: 1-phosphatidylinositol 4-kinase activity view genes	1 out of 2566 0.04%	7 out of 11955 0.06%	1	n-64907
Molecular Function: double-stranded methylated DNA binding view genes	1 out of 2566 0.04%	7 out of 11955 0.06%	1	n-57816
Molecular Function: ferric iron binding view genes	1 out of 2566 0.04%	7 out of 11955 0.06%	1	s-48293
Molecular Function: mitogen-activated protein kinase kinase kinase binding view genes	1 out of 2566 0.04%	7 out of 11955 0.06%	1	all-5661
Molecular Function: catalase activity view genes	1 out of 2566 0.04%	7 out of 11955 0.06%	1	s-31024
Molecular Function: hydroxymethyl-, formyl- and related transferase activity view genes	1 out of 2566 0.04%	7 out of 11955 0.06%	1	all-1339
Molecular Function: ATP-dependent peptidase activity view genes	1 out of 2566 0.04%	7 out of 11955 0.06%	1	n-64651
Molecular Function: RNA cap binding view genes	1 out of 2566 0.04%	7 out of 11955 0.06%	1	s-36122
Molecular Function: histone deacetylase activity (H4-K16 specific) view genes	1 out of 2566 0.04%	7 out of 11955 0.06%	1	s-21123
Molecular Function: juvenile hormone binding view genes	1 out of 2566 0.04%	7 out of 11955 0.06%	1	all-35770
Molecular Function: glycerol kinase activity view genes	1 out of 2566 0.04%	7 out of 11955 0.06%	1	n-13773
Molecular Function: aspartate carbamoyltransferase activity view genes	1 out of 2566 0.04%	7 out of 11955 0.06%	1	n-21949
Molecular Function: calcium-dependent cysteine-type endopeptidase activity view genes	1 out of 2566 0.04%	7 out of 11955 0.06%	1	n-53640
Molecular Function: heparin binding view genes	1 out of 2566 0.04%	7 out of 11955 0.06%	1	all-71254
Molecular Function: ATP citrate synthase activity view genes	1 out of 2566 0.04%	7 out of 11955 0.06%	1	n-47028
Molecular Function: neurotrophin receptor activity view genes	1 out of 2566 0.04%	7 out of 11955 0.06%	1	s-27923
Molecular Function: substrate-specific transporter activity view genes	1 out of 2566 0.04%	7 out of 11955 0.06%	1	n-2601
Molecular Function: P-P-bond-hydrolysis-driven protein transmembrane transporter activity view genes	1 out of 2566 0.04%	7 out of 11955 0.06%	1	n-37
Molecular Function: molybdenum ion binding view genes	1 out of 2566 0.04%	7 out of 11955 0.06%	1	s-23716
Molecular Function: protein kinase binding view genes	10 out of 2566 0.39%	58 out of 11955 0.49%	1	s-22692, n-45807, all-3847, n-65251, n-40787, n-636, n-8809, n-7469, n-63533, all-48363
Molecular Function: transcription factor binding view genes	35 out of 2566 1.36%	186 out of 11955 1.56%	1	n-25620, all-64659, s-24163, n-24045, n-3938, all-17023, n-3316, all-18080, n-63533, n-53972, n-19525, s-53787, all-6156, n-63326, s-36633, n-34626, all-3658, all-54279, all-48671, all-10565, n-36316, n-1938, all-17737, all-8146, n-50430, all-6644, s-22308, all-2869, all-20305, all-3392, n-14062, n-54618, n-7469, n-38619, all-4574
Molecular Function: histone binding view genes	2 out of 2566 0.08%	14 out of 11955 0.12%	1	n-40204, all-6483
Molecular Function: phosphorus-oxygen lyase activity view genes	2 out of 2566 0.08%	14 out of 11955 0.12%	1	n-32159, n-150
Molecular Function: single-stranded DNA binding view genes	2 out of 2566 0.08%	14 out of 11955 0.12%	1	all-402, s-51069
Molecular Function: nucleotidyltransferase activity view genes	8 out of 2566 0.31%	48 out of 11955 0.40%	1	n-63223, all-37480, all-29835, all-58372, n-24840, all-48900, n-1571, all-57085
Molecular Function: magnesium ion binding view genes	11 out of 2566 0.43%	64 out of 11955 0.54%	1	s-27278, s-52709, n-64916, n-7489, n-12286, s-19433, all-7137, n-613, n-42871, n-30277, n-3967
Molecular Function: PDZ domain binding view genes	9 out of 2566 0.35%	54 out of 11955 0.45%	1	all-18874, all-18, n-8506, n-41352, all-1236, n-30100, n-59916, all-775, all-3788
Molecular Function: actin binding view genes	21 out of 2566 0.82%	117 out of 11955 0.98%	1	all-7599, n-50644, n-65225, s-52486, n-8553, all-35349, n-24045, n-9506, s-3287, n-33973, n-54647, all-935, n-21484, s-52817, s-4841, all-17360, s-51939, all-29210, n-21260, n-5000, all-787
Molecular Function: motor activity view genes	15 out of 2566 0.58%	86 out of 11955 0.72%	1	all-7599, n-64076, s-24163, n-24045, n-48687, s-53394, s-51939, n-35466, all-36812, all-5965, s-52742, s-34889, all-4039, all-70292, all-7376
Molecular Function: myosin light chain kinase activity view genes	1 out of 2566 0.04%	8 out of 11955 0.07%	1	all-16043
Molecular Function: protein serine/threonine/tyrosine kinase activity view genes	1 out of 2566 0.04%	8 out of 11955 0.07%	1	s-51925
Molecular Function: fucosyltransferase activity view genes	1 out of 2566 0.04%	8 out of 11955 0.07%	1	n-2653
Molecular Function: diacylglycerol kinase activity view genes	1 out of 2566 0.04%	8 out of 11955 0.07%	1	n-13773
Molecular Function: acyl-[acyl-carrier-protein] hydrolase activity view genes	1 out of 2566 0.04%	8 out of 11955 0.07%	1	n-58640
Molecular Function: ionotropic glutamate receptor activity view genes	1 out of 2566 0.04%	8 out of 11955 0.07%	1	n-34155
Molecular Function: p53 binding view genes	1 out of 2566 0.04%	8 out of 11955 0.07%	1	all-9123
Molecular Function: succinate-CoA ligase (ADP-forming) activity view genes	1 out of 2566 0.04%	8 out of 11955 0.07%	1	n-47028
Molecular Function: DNA binding view genes	97 out of 2566 3.78%	494 out of 11955 4.13%	1	all-61453, n-10414, n-43562, all-16684, s-39019, all-55380, s-53337, all-45032, all-56279, n-3316, n-18383, all-36328, all-63068, s-7319, n-6199, s-10864, all-9605, s-15951, n-1594, n-13414, all-1549, s-1451, n-2545, n-41312, n-22288, all-67493, n-27690, all-37835, s-18818, s-48735, all-23398, all-46687, all-2634, all-5243, all-4457, n-19118, all-64706, n-6293, all-20305, all-50210, n-12764, n-64…
Molecular Function: kinase activity view genes	45 out of 2566 1.75%	239 out of 11955 2.00%	1	n-49155, n-65318, s-33871, all-34383, n-40541, n-50641, all-14688, all-2648, all-2447, n-8455, all-17558, all-26538, all-31701, n-755, all-711, all-71582, s-2665, n-11086, s-52923, n-33760, n-33111, n-23079, s-14294, all-12828, n-8035, s-6002, n-28516, n-24289, s-53378, s-47256, s-2361, n-9166, all-4634, s-14869, s-5608, s-21459, n-11847, s-13084, s-31570, n-21277, n-8874, n-42871, n-63817, all-1…
Molecular Function: cysteine-type peptidase activity view genes	9 out of 2566 0.35%	55 out of 11955 0.46%	1	all-17620, n-11632, all-27010, s-52647, all-62750, s-39886, all-43963, all-71051, all-19796
Molecular Function: MAP kinase activity view genes	2 out of 2566 0.08%	15 out of 11955 0.13%	1	n-63533, all-13041
Molecular Function: sulfuric ester hydrolase activity view genes	2 out of 2566 0.08%	15 out of 11955 0.13%	1	n-64353, all-52359
Molecular Function: polypeptide N-acetylgalactosaminyltransferase activity view genes	2 out of 2566 0.08%	15 out of 11955 0.13%	1	n-15184, s-7552
Molecular Function: transmembrane receptor protein tyrosine kinase activity view genes	6 out of 2566 0.23%	39 out of 11955 0.33%	1	n-1800, s-47669, n-28702, all-40866, s-27923, all-4634
Molecular Function: serine-type peptidase activity view genes	4 out of 2566 0.16%	28 out of 11955 0.23%	1	n-943, all-2046, all-13679, n-6589
Molecular Function: structural constituent of muscle view genes	3 out of 2566 0.12%	22 out of 11955 0.18%	1	s-54471, n-20186, n-46081
Molecular Function: hydrolase activity, hydrolyzing O-glycosyl compounds view genes	10 out of 2566 0.39%	62 out of 11955 0.52%	1	all-64322, all-37183, s-45587, n-46314, all-14545, all-28167, all-14438, all-8514, all-22241, all-4832
Molecular Function: Y-form DNA binding view genes	1 out of 2566 0.04%	9 out of 11955 0.08%	1	all-34484
Molecular Function: chitin binding view genes	1 out of 2566 0.04%	9 out of 11955 0.08%	1	s-5608
Molecular Function: photoreceptor activity view genes	1 out of 2566 0.04%	9 out of 11955 0.08%	1	n-19770
Molecular Function: siRNA binding view genes	1 out of 2566 0.04%	9 out of 11955 0.08%	1	all-71230
Molecular Function: miRNA binding view genes	1 out of 2566 0.04%	9 out of 11955 0.08%	1	all-71230
Molecular Function: choline dehydrogenase activity view genes	1 out of 2566 0.04%	9 out of 11955 0.08%	1	n-313
Molecular Function: nuclear export signal receptor activity view genes	1 out of 2566 0.04%	9 out of 11955 0.08%	1	n-62781
Molecular Function: ferroxidase activity view genes	1 out of 2566 0.04%	9 out of 11955 0.08%	1	s-48293
Molecular Function: endoribonuclease activity view genes	2 out of 2566 0.08%	16 out of 11955 0.13%	1	n-4754, all-71230
Molecular Function: biotin carboxylase activity view genes	2 out of 2566 0.08%	16 out of 11955 0.13%	1	all-69789, s-46562
Molecular Function: acetylcholine transmembrane transporter activity view genes	9 out of 2566 0.35%	57 out of 11955 0.48%	1	all-31687, n-62974, all-18874, n-43501, all-1236, n-30100, n-59916, all-775, all-3788
Molecular Function: myosin light chain binding view genes	6 out of 2566 0.23%	41 out of 11955 0.34%	1	s-51939, s-36633, all-3847, s-24163, s-34889, all-6644
Molecular Function: myosin phosphatase activity view genes	1 out of 2566 0.04%	10 out of 11955 0.08%	1	n-64426
Molecular Function: protein N-terminus binding view genes	1 out of 2566 0.04%	10 out of 11955 0.08%	1	n-63533
Molecular Function: double-stranded DNA binding view genes	1 out of 2566 0.04%	10 out of 11955 0.08%	1	n-21997
Molecular Function: tubulin-glutamic acid ligase activity view genes	1 out of 2566 0.04%	10 out of 11955 0.08%	1	all-9647
Molecular Function: guanylate cyclase activity view genes	1 out of 2566 0.04%	10 out of 11955 0.08%	1	all-4735
Molecular Function: hydrolase activity, acting on carbon-nitrogen (but not peptide) bonds view genes	3 out of 2566 0.12%	24 out of 11955 0.20%	1	all-70585, s-27667, n-19162
Molecular Function: serine-type endopeptidase activity view genes	7 out of 2566 0.27%	48 out of 11955 0.40%	1	n-64651, n-63944, n-45807, n-636, n-8809, all-55596, all-4457
Molecular Function: monoamine transmembrane transporter activity view genes	2 out of 2566 0.08%	18 out of 11955 0.15%	1	all-175, all-69916
Molecular Function: signal transducer activity view genes	19 out of 2566 0.74%	115 out of 11955 0.96%	1	all-1645, all-1445, all-31261, n-1239, all-7255, all-25801, all-3953, n-21192, all-246, n-3855, n-11881, n-37678, n-8232, all-70856, all-3769, all-71597, all-6355, n-44347, all-145
Molecular Function: oxidoreductase activity, acting on CH-OH group of donors view genes	3 out of 2566 0.12%	25 out of 11955 0.21%	1	n-38648, all-341, n-62733
Molecular Function: non-membrane spanning protein tyrosine kinase activity view genes	3 out of 2566 0.12%	25 out of 11955 0.21%	1	n-1800, n-65034, s-13486
Molecular Function: organic cation transmembrane transporter activity view genes	3 out of 2566 0.12%	25 out of 11955 0.21%	1	all-67173, all-14865, all-27942
Molecular Function: ATP-dependent 3'-5' DNA helicase activity view genes	1 out of 2566 0.04%	11 out of 11955 0.09%	1	all-34484
Molecular Function: neuropeptide hormone activity view genes	1 out of 2566 0.04%	11 out of 11955 0.09%	1	n-9475
Molecular Function: adenylate kinase activity view genes	1 out of 2566 0.04%	11 out of 11955 0.09%	1	n-63296
Molecular Function: MAP kinase kinase kinase activity view genes	1 out of 2566 0.04%	11 out of 11955 0.09%	1	n-65034
Molecular Function: calcium-transporting ATPase activity view genes	1 out of 2566 0.04%	11 out of 11955 0.09%	1	all-50790
Molecular Function: nucleotide binding view genes	140 out of 2566 5.46%	725 out of 11955 6.06%	1	n-1971, all-7306, all-34383, s-30413, all-7702, all-11492, n-7135, all-3793, n-62782, n-16246, n-64844, n-25458, n-32785, all-711, n-49462, all-56104, n-51226, all-2608, all-7376, all-7599, all-4709, all-51690, all-36262, all-59927, all-34484, all-11554, all-36854, n-943, n-56331, all-71143, all-2327, all-6644, n-11030, all-20305, s-36122, n-64121, n-5155, all-71103, s-39216, all-5965, n-42389, n…
Molecular Function: protein tyrosine phosphatase activity view genes	8 out of 2566 0.31%	57 out of 11955 0.48%	1	all-3392, all-70552, n-45506, all-14372, all-63463, n-2270, all-59985, n-63251
Molecular Function: translation repressor activity, nucleic acid binding view genes	4 out of 2566 0.16%	33 out of 11955 0.28%	1	n-38655, n-63639, all-17023, n-19317
Molecular Function: NAD+ ADP-ribosyltransferase activity view genes	2 out of 2566 0.08%	20 out of 11955 0.17%	1	all-40072, all-6483
Molecular Function: calcium channel activity view genes	2 out of 2566 0.08%	20 out of 11955 0.17%	1	s-53239, n-2721
Molecular Function: protein self-association view genes	3 out of 2566 0.12%	27 out of 11955 0.23%	1	n-13404, n-54513, n-4012
Molecular Function: transferase activity, transferring phosphorus-containing groups view genes	36 out of 2566 1.40%	210 out of 11955 1.76%	1	s-11749, all-4735, all-67241, n-51778, all-5497, all-46394, s-53747, all-5741, all-43245, all-12298, all-71597, all-33374, n-56072, all-41136, all-2891, s-34889, n-41793, n-32159, all-44354, n-62236, s-6002, all-544, all-66994, n-4180, all-37546, all-22616, all-9478, n-64676, all-15092, n-40861, n-28702, all-6799, s-5564, n-17252, all-46488, all-49102
Molecular Function: bHLH transcription factor binding view genes	9 out of 2566 0.35%	64 out of 11955 0.54%	1	all-34124, n-6853, all-14350, n-19317, n-6618, s-22035, all-57094, n-24241, all-45922
Molecular Function: phosphatidylinositol phospholipase C activity view genes	1 out of 2566 0.04%	13 out of 11955 0.11%	1	s-14930
Molecular Function: solute:sodium symporter activity view genes	1 out of 2566 0.04%	13 out of 11955 0.11%	1	n-30100
Molecular Function: Rho guanyl-nucleotide exchange factor activity view genes	2 out of 2566 0.08%	21 out of 11955 0.18%	1	all-31989, all-70492
Molecular Function: anion binding view genes	10 out of 2566 0.39%	72 out of 11955 0.60%	1	s-36633, all-2223, s-24163, all-6792, s-52605, all-887, n-55383, n-56202, s-51314, n-51226
Molecular Function: oxidoreductase activity view genes	100 out of 2566 3.90%	542 out of 11955 4.53%	1	n-19676, all-51943, n-1258, all-21197, n-52405, all-22505, n-7691, n-64844, s-21358, all-68777, all-19343, s-32274, n-43582, n-24662, all-47482, n-40051, n-14537, n-22831, all-71775, all-3104, all-6568, all-31130, n-18517, all-9949, all-58352, n-64109, n-58640, s-20280, all-6346, n-509, n-50082, all-2002, n-41301, all-17393, n-50312, s-18929, n-46168, all-10052, s-5739, s-38496, n-38032, all-7267…
Molecular Function: NAD-dependent histone deacetylase activity view genes	1 out of 2566 0.04%	14 out of 11955 0.12%	1	s-21123
Molecular Function: phospholipid-translocating ATPase activity view genes	1 out of 2566 0.04%	14 out of 11955 0.12%	1	n-613
Molecular Function: ATP-dependent DNA helicase activity view genes	3 out of 2566 0.12%	30 out of 11955 0.25%	1	all-15524, s-18818, all-7801
Molecular Function: phosphotransferase activity, alcohol group as acceptor view genes	6 out of 2566 0.23%	50 out of 11955 0.42%	1	all-11802, all-31701, n-11086, n-63639, s-14294, all-12828
Molecular Function: protein kinase C activity view genes	2 out of 2566 0.08%	23 out of 11955 0.19%	1	s-17632, all-7991
Molecular Function: JUN kinase activity view genes	1 out of 2566 0.04%	15 out of 11955 0.13%	1	n-63533
Molecular Function: acetylcholinesterase activity view genes	1 out of 2566 0.04%	15 out of 11955 0.13%	1	n-34494
Molecular Function: hydrolase activity, acting on acid anhydrides view genes	1 out of 2566 0.04%	15 out of 11955 0.13%	1	all-1414
Molecular Function: ubiquitin-specific protease activity view genes	1 out of 2566 0.04%	15 out of 11955 0.13%	1	s-27987
Molecular Function: nucleoside-triphosphatase activity view genes	53 out of 2566 2.07%	308 out of 11955 2.58%	1	all-793, n-13896, all-70952, all-858, s-3405, s-51958, n-7135, s-25381, all-41747, n-2031, s-19362, n-12219, all-32609, all-2608, all-20479, s-36633, s-8672, all-707, n-41312, n-22288, all-11046, all-18107, all-24966, n-64651, n-42389, n-63027, all-19032, s-32000, n-1239, all-22879, all-52393, all-40669, all-31374, n-1687, n-20454, s-8985, n-9292, s-10364, all-1938, all-11130, all-35744, all-7168…
Molecular Function: DNA topoisomerase type I activity view genes	3 out of 2566 0.12%	31 out of 11955 0.26%	1	all-5552, all-2635, s-28265
Molecular Function: transporter activity view genes	17 out of 2566 0.66%	116 out of 11955 0.97%	1	n-39714, all-51786, all-22879, all-839, n-5633, n-4721, n-65335, s-22409, all-1547, s-25342, all-8701, all-2037, all-25348, all-5412, n-64, n-42888, all-5755
Molecular Function: calcium ion binding view genes	40 out of 2566 1.56%	242 out of 11955 2.02%	1	all-71718, all-19383, all-6262, all-3161, s-3405, n-65359, all-935, s-4841, n-63007, all-17360, s-20087, n-63292, n-923, n-64077, all-26538, n-46804, all-13857, all-63964, s-16765, all-29210, all-70552, n-28516, n-56552, s-13785, s-3890, s-47256, all-23124, all-6986, s-181, n-58430, s-24657, n-18767, all-55425, n-25637, n-52715, all-18743, all-1333, all-5412, all-10132, all-31215
Molecular Function: microtubule binding view genes	9 out of 2566 0.35%	72 out of 11955 0.60%	1	all-54577, n-61961, all-71296, n-57223, all-69789, s-53683, all-69914, all-8572, all-12395
Molecular Function: acetylcholine-activated cation-selective channel activity view genes	1 out of 2566 0.04%	17 out of 11955 0.14%	1	n-11040
Molecular Function: 3',5'-cyclic-nucleotide phosphodiesterase activity view genes	1 out of 2566 0.04%	17 out of 11955 0.14%	1	n-38474
Molecular Function: transferase activity view genes	88 out of 2566 3.43%	496 out of 11955 4.15%	1	n-64028, s-54235, all-2648, s-125, n-22331, s-10773, n-4144, s-14559, all-36328, n-63419, all-37934, all-37480, all-26389, n-5053, n-6049, all-61436, all-7816, n-5403, all-56522, n-43523, s-1944, n-63924, n-62836, all-14086, all-57826, all-4621, s-7240, all-42542, s-19433, all-6833, all-64706, n-31234, n-5603, all-71330, n-56800, n-63232, all-11352, n-35831, n-8318, n-44705, n-1884, n-8922, n-137…
Molecular Function: GTPase activator activity view genes	2 out of 2566 0.08%	26 out of 11955 0.22%	1	n-1096, all-2542
Molecular Function: mismatched DNA binding view genes	1 out of 2566 0.04%	18 out of 11955 0.15%	1	all-57655
Molecular Function: acetylcholine receptor activity view genes	1 out of 2566 0.04%	18 out of 11955 0.15%	1	all-56554
Molecular Function: structural constituent of ribosome view genes	25 out of 2566 0.97%	167 out of 11955 1.40%	1	n-1134, n-43562, all-808, all-57350, all-38469, all-60133, all-50791, s-46028, all-71503, n-36223, s-2806, s-53596, n-52725, all-6596, all-60707, all-1313, n-110, n-62928, all-22885, n-64401, all-41319, s-1567, n-20593, all-31678, n-62958
Molecular Function: protein kinase activity view genes	34 out of 2566 1.33%	218 out of 11955 1.82%	1	all-24551, n-65318, s-24163, all-4735, all-71230, s-51837, s-30413, all-14688, n-5761, all-5497, all-51251, s-3400, all-41136, n-51226, all-70277, all-46893, all-10192, n-46953, n-62214, s-22312, all-2446, all-42436, all-45034, all-1177, all-40866, s-23052, all-6986, all-5877, s-51791, all-5339, all-66588, all-4078, all-23881, s-27009
Molecular Function: catalytic activity view genes	177 out of 2566 6.90%	952 out of 11955 7.96%	1	n-46655, n-12222, n-26411, n-15376, n-19243, all-37768, n-62835, n-14978, n-6736, n-64740, all-21137, n-52405, s-54908, all-8566, all-11492, all-3434, n-27489, all-60081, all-2626, all-711, n-59429, n-9006, all-57847, n-3729, s-33569, all-71093, all-3763, all-5982, s-51059, n-56100, all-28156, all-40371, n-6, all-3104, all-27067, all-41322, n-7451, n-3906, n-33956, all-71803, all-59215, n-64261, …
Molecular Function: zinc ion binding view genes	74 out of 2566 2.88%	432 out of 11955 3.61%	1	all-5458, all-29014, all-1520, n-1221, all-9225, s-53745, all-8513, all-29742, all-9430, all-3135, all-29647, all-59985, all-7299, n-64836, n-53336, n-4012, all-10558, s-8672, n-41866, all-67493, n-33813, all-38430, all-35770, all-23398, all-2324, all-70585, n-19118, n-35308, s-54471, n-2476, n-7222, all-12410, n-39587, n-57056, s-19218, n-64791, all-21364, n-20555, n-63907, s-3923, all-61400, al…
Molecular Function: metal ion binding view genes	145 out of 2566 5.65%	798 out of 11955 6.68%	1	all-12934, all-58619, all-6262, all-1645, n-59025, s-28159, n-12231, n-766, n-4235, n-17017, all-1757, all-1763, all-37480, all-6581, n-7691, n-25458, n-32785, s-51761, n-19162, s-32274, s-31024, n-57816, n-5720, all-47482, all-4621, all-15924, n-23727, n-5999, n-2398, s-14869, n-64121, n-55357, n-18517, s-27667, all-1651, n-14667, s-17632, all-40669, all-31374, s-46562, n-62733, s-53787, s-39772…
Molecular Function: sequence-specific DNA binding RNA polymerase II transcription factor activity view genes	11 out of 2566 0.43%	91 out of 11955 0.76%	1	n-63407, n-17218, all-14542, s-7319, s-6580, s-25381, s-30312, n-51716, all-70539, all-10334, n-25157
Molecular Function: transmembrane transporter activity view genes	3 out of 2566 0.12%	39 out of 11955 0.33%	1	n-62708, all-19019, all-27942
Molecular Function: transferase activity, transferring hexosyl groups view genes	2 out of 2566 0.08%	31 out of 11955 0.26%	1	all-70534, n-5781
Molecular Function: ATPase activity view genes	44 out of 2566 1.71%	285 out of 11955 2.38%	1	n-13896, all-70952, n-4431, n-5961, all-38469, all-858, s-3405, s-51958, n-7135, all-39678, all-32609, all-20479, all-51690, all-18125, s-33755, n-12866, s-24657, all-5965, all-19032, n-1378, s-32000, all-22879, all-11658, n-22123, all-40669, n-12286, n-20454, s-8985, all-59064, n-31059, n-25112, all-35744, all-71688, n-1106, n-65335, all-11822, s-48647, n-12907, all-16537, s-21295, all-16683, al…
Molecular Function: protein serine/threonine kinase activity view genes	37 out of 2566 1.44%	249 out of 11955 2.08%	1	n-49155, n-45562, all-6962, n-65251, n-50641, n-28878, s-30413, n-11796, n-5761, n-11019, s-51870, n-29101, s-35733, n-4397, s-3400, all-49335, all-2891, s-12149, all-3903, s-47506, n-65034, all-16043, n-52728, all-11554, n-7231, s-13486, all-37546, all-7137, all-887, all-5339, s-51925, all-5412, n-54102, n-13633, n-11920, all-46488, s-27009
Molecular Function: DNA-directed DNA polymerase activity view genes	1 out of 2566 0.04%	25 out of 11955 0.21%	1	s-10864
Molecular Function: Rab GTPase activator activity view genes	1 out of 2566 0.04%	25 out of 11955 0.21%	1	all-40371
Molecular Function: ion binding view genes	50 out of 2566 1.95%	337 out of 11955 2.82%	1	n-1971, all-54577, all-12934, n-46655, all-7306, n-50641, s-6960, all-2648, all-21197, s-14930, n-33440, n-7691, s-25381, all-68777, all-31135, s-52923, all-70277, all-3903, all-2608, all-19238, all-36262, all-14086, all-71143, all-1991, n-56100, s-5608, all-5365, n-38619, all-71254, all-31942, n-17096, all-15870, s-37133, n-63944, all-59064, s-16333, all-2446, n-1800, n-55376, n-14304, n-38648, …
Molecular Function: ubiquitin thiolesterase activity view genes	2 out of 2566 0.08%	42 out of 11955 0.35%	1	all-2861, n-4433
Molecular Function: phospholipid binding view genes	6 out of 2566 0.23%	77 out of 11955 0.64%	1	n-48520, s-17632, n-7289, n-62867, all-7092, all-9681
Molecular Function: ATPase activity, coupled to transmembrane movement of substances view genes	4 out of 2566 0.16%	67 out of 11955 0.56%	1	all-11658, all-11822, s-48647, all-42452
Molecular Function: microtubule motor activity view genes	23 out of 2566 0.90%	199 out of 11955 1.66%	1	all-70952, n-4431, n-22123, all-38469, all-858, all-40669, s-3405, s-51958, all-32609, all-7376, all-20479, all-71688, n-64076, s-3178, all-18125, all-16537, s-33755, s-53394, s-24657, all-16683, all-5965, all-69914, all-12395
Molecular Function: ATP binding view genes	207 out of 2566 8.07%	1200 out of 11955 10.04%	1	all-12934, all-70952, all-34383, all-4735, n-63533, s-51958, n-7135, n-46081, all-37934, all-70479, all-56104, n-38656, n-14732, n-39928, n-25146, n-63371, all-71143, all-5965, all-25485, n-33480, all-31942, n-6393, n-40787, n-24045, s-17632, all-40669, n-42508, n-20454, n-1868, n-50441, s-46562, all-51772, all-5789, n-509, n-65034, all-52321, n-46953, all-2223, n-27946, s-48647, all-16537, s-212…
Molecular Function: ion channel activity view genes	3 out of 2566 0.12%	68 out of 11955 0.57%	1	all-37836, s-31166, all-59985

## Sheet: S-specifc
Gene Ontology term	Unigenes with GO annotation in southern specific SNPs (962)	Totally unigenes with GO annotation (5135)	Corrected P-value	Unigene ID
Molecular Function: proton-transporting ATPase activity, rotational mechanism view genes	11 out of 1967 0.56%	12 out of 11955 0.10%	1.9e-05	n-11978, s-14498, n-140, n-19770, all-26302, all-1361, all-42452, all-40509, n-16836, n-3378, n-18737
Molecular Function: protein binding view genes	306 out of 1967 15.56%	1465 out of 11955 12.25%	0.00093	n-59626, n-36, s-5232, all-2817, all-70576, s-8939, s-11978, all-17038, all-40925, all-70534, n-4407, all-9311, all-67190, n-22966, all-16043, n-1230, n-1557, all-36854, n-25146, n-62404, n-63371, n-54555, all-48036, all-60284, all-71103, all-9911, s-6580, n-1341, all-38257, all-23397, n-64981, n-11247, n-1199, n-12737, all-52393, n-42508, all-71693, s-51451, s-20280, s-25543, all-71608, n-7516, …
Molecular Function: endopeptidase activity view genes	15 out of 1967 0.76%	28 out of 11955 0.23%	0.00582	n-3811, s-39886, s-18764, n-62938, n-8444, n-29548, all-30672, n-11500, all-5992, n-1378, n-11632, n-42500, n-43603, all-65441, n-10988
Molecular Function: threonine-type endopeptidase activity view genes	10 out of 1967 0.51%	14 out of 11955 0.12%	0.00599	s-3298, n-11238, s-18764, s-54407, n-4707, n-21270, n-64277, n-5026, all-5992, n-10988
Molecular Function: structural molecule activity view genes	31 out of 1967 1.58%	92 out of 11955 0.77%	0.0304	all-48457, all-36469, n-20104, all-2145, all-17744, n-32876, n-2054, all-30304, n-54555, n-13877, all-548, all-38784, s-45536, all-30740, n-47501, s-52817, s-296, n-19264, n-20380, n-537, all-70345, s-10364, s-30607, n-12392, n-15023, n-7469, all-23397, n-1614, all-710, all-763, n-5517
Molecular Function: actin filament binding view genes	10 out of 1967 0.51%	19 out of 11955 0.16%	0.249	all-36507, n-26162, all-5206, n-4175, n-30036, n-8553, all-29210, all-8572, n-63771, s-15029
Molecular Function: dolichyl-diphosphooligosaccharide-protein glycotransferase activity view genes	4 out of 1967 0.20%	4 out of 11955 0.03%	0.583	s-11988, n-569, all-6673, n-14184
Molecular Function: mRNA 5'-UTR binding view genes	6 out of 1967 0.31%	9 out of 11955 0.08%	0.84	n-8294, n-58032, n-1104, n-20434, n-48616, n-18788
Molecular Function: NADH dehydrogenase (ubiquinone) activity view genes	7 out of 1967 0.36%	12 out of 11955 0.10%	0.946	all-19945, all-10486, s-54824, all-14788, n-716, n-5720, n-6026
Molecular Function: peptidyl-prolyl cis-trans isomerase activity view genes	12 out of 1967 0.61%	29 out of 11955 0.24%	1	n-53521, n-5155, n-47116, all-6890, s-24850, all-31476, n-9828, s-18206, n-4096, all-3153, s-14295, s-11631
Molecular Function: unfolded protein binding view genes	18 out of 1967 0.92%	54 out of 11955 0.45%	1	n-28240, n-19107, all-19383, n-33425, n-3833, n-6924, n-4788, n-7828, all-3142, all-71512, n-15467, n-11711, n-1915, n-1091, n-8188, s-46538, n-20388, n-45556
Molecular Function: protein homodimerization activity view genes	26 out of 1967 1.32%	92 out of 11955 0.77%	1	n-36618, n-41116, n-10750, s-35016, n-25620, all-38286, n-19484, s-30413, s-31583, n-16405, s-12090, n-64740, n-46607, all-9771, s-54497, n-35466, all-32073, all-5339, all-3135, n-313, all-2891, s-573, n-5430, n-40204, s-27009, all-29418
Molecular Function: enzyme regulator activity view genes	7 out of 1967 0.36%	14 out of 11955 0.12%	1	s-7380, n-26708, all-14638, all-30672, all-1221, n-11500, all-65024
Molecular Function: protein heterodimerization activity view genes	26 out of 1967 1.32%	94 out of 11955 0.79%	1	s-1365, n-63584, s-1397, s-35016, n-25620, all-71373, all-3658, s-5232, all-9947, n-21997, n-46607, n-53972, s-53787, n-63223, s-35966, s-54724, all-9431, n-28537, n-7512, all-3135, s-15951, s-11690, s-573, n-5430, all-70763, n-36041
Molecular Function: monooxygenase activity view genes	26 out of 1967 1.32%	94 out of 11955 0.79%	1	s-6959, all-23312, n-19676, all-21042, all-16120, n-16649, n-820, all-1589, all-40846, all-19303, all-24568, all-17965, s-29805, all-8604, n-20246, s-7097, n-6363, n-4376, n-33571, n-1025, s-19821, n-25650, n-41066, all-70763, all-14711, all-2848
Molecular Function: aldehyde dehydrogenase (NAD) activity view genes	5 out of 1967 0.25%	8 out of 11955 0.07%	1	all-53139, s-23913, all-8410, s-16548, all-39353
Molecular Function: translation initiation factor activity view genes	15 out of 1967 0.76%	46 out of 11955 0.38%	1	n-63584, n-25620, n-41494, n-62880, n-16246, all-54229, n-46296, n-39587, n-25146, n-2243, n-5080, n-65171, n-988, n-36092, all-58749
Molecular Function: actin binding view genes	30 out of 1967 1.53%	117 out of 11955 0.98%	1	all-7599, all-66020, n-65225, n-8553, n-8396, all-35349, n-24045, n-5411, n-4277, s-3287, n-33973, n-26162, n-54647, all-935, n-1203, n-21484, s-52817, s-21732, all-17360, n-21074, all-71810, all-36124, s-11917, all-22730, n-60815, all-29210, all-24565, n-14772, n-5000, all-787
Molecular Function: G-protein beta/gamma-subunit complex binding view genes	6 out of 1967 0.31%	12 out of 11955 0.10%	1	all-246, all-6355, n-8232, all-1645, all-46201, all-70856
Molecular Function: phosphatidylserine binding view genes	4 out of 1967 0.20%	6 out of 11955 0.05%	1	all-5206, all-71254, s-15029, n-30036
Molecular Function: protein kinase C inhibitor activity view genes	4 out of 1967 0.20%	6 out of 11955 0.05%	1	s-573, s-54724, n-46607, all-70763
Molecular Function: G-protein coupled amine receptor activity view genes	9 out of 1967 0.46%	24 out of 11955 0.20%	1	n-63736, s-14552, s-11577, n-10389, n-64283, n-25007, s-52677, n-3727, all-21723
Molecular Function: sevenless binding view genes	6 out of 1967 0.31%	13 out of 11955 0.11%	1	s-5859, n-27000, all-5323, all-11980, n-5000, n-30036
Molecular Function: G-protein coupled receptor binding view genes	5 out of 1967 0.25%	10 out of 11955 0.08%	1	all-246, all-6355, n-8232, all-1645, all-70856
Molecular Function: cytidylate kinase activity view genes	3 out of 1967 0.15%	4 out of 11955 0.03%	1	n-12168, all-38424, n-63296
Molecular Function: enzyme inhibitor activity view genes	3 out of 1967 0.15%	4 out of 11955 0.03%	1	all-25588, s-2898, n-45534
Molecular Function: steroid dehydrogenase activity, acting on the CH-OH group of donors, NAD or NADP as acceptor view genes	13 out of 1967 0.66%	43 out of 11955 0.36%	1	all-22505, n-2201, all-10352, all-64194, all-11431, n-5493, n-1628, n-1728, n-2461, n-13425, n-64740, all-3720, n-64392
Molecular Function: structural constituent of chitin-based larval cuticle view genes	6 out of 1967 0.31%	14 out of 11955 0.12%	1	n-32433, n-62861, s-39886, all-6235, n-11632, n-6801
Molecular Function: cation binding view genes	6 out of 1967 0.31%	14 out of 11955 0.12%	1	n-3441, all-35765, n-54062, s-53787, all-3847, all-11327
Molecular Function: SH3/SH2 adaptor activity view genes	7 out of 1967 0.36%	18 out of 11955 0.15%	1	s-5859, all-5323, n-30036, n-27000, n-9646, all-11980, n-5000
Molecular Function: mRNA binding view genes	15 out of 1967 0.76%	54 out of 11955 0.45%	1	s-36122, n-5155, n-13404, all-10740, all-31476, n-16246, s-8241, all-63614, s-42, s-14755, n-47116, n-20434, s-31004, s-11690, s-51059
Molecular Function: hydrogen ion transmembrane transporter activity view genes	6 out of 1967 0.31%	15 out of 11955 0.13%	1	all-19945, n-7150, all-26302, n-53983, all-1361, n-62980
Molecular Function: alpha-amylase activity view genes	2 out of 1967 0.10%	2 out of 11955 0.02%	1	s-52501, all-35765
Molecular Function: phosphopyruvate hydratase activity view genes	2 out of 1967 0.10%	2 out of 11955 0.02%	1	all-4569, s-27278
Molecular Function: ribonucleoside-diphosphate reductase activity, thioredoxin disulfide as acceptor view genes	2 out of 1967 0.10%	2 out of 11955 0.02%	1	n-1868, s-52477
Molecular Function: dihydroorotate dehydrogenase activity view genes	2 out of 1967 0.10%	2 out of 11955 0.02%	1	all-21292, all-7388
Molecular Function: myosin II binding view genes	2 out of 1967 0.10%	2 out of 11955 0.02%	1	all-2651, n-4924
Molecular Function: peptide receptor activity view genes	2 out of 1967 0.10%	2 out of 11955 0.02%	1	n-55328, n-63697
Molecular Function: tryptophan hydroxylase activator activity view genes	2 out of 1967 0.10%	2 out of 11955 0.02%	1	s-573, n-46607
Molecular Function: electron transporter, transferring electrons from CoQH2-cytochrome c reductase complex and cytochrome c oxidase complex activity view genes	2 out of 1967 0.10%	2 out of 11955 0.02%	1	all-71788, n-62478
Molecular Function: dihydroorotate oxidase activity view genes	2 out of 1967 0.10%	2 out of 11955 0.02%	1	n-1040, all-21292
Molecular Function: eukaryotic initiation factor 4G binding view genes	2 out of 1967 0.10%	2 out of 11955 0.02%	1	n-41494, n-2243
Molecular Function: protein C-terminus binding view genes	4 out of 1967 0.20%	8 out of 11955 0.07%	1	all-17023, s-22308, all-20300, all-65441
Molecular Function: lysophosphatidic acid acyltransferase activity view genes	4 out of 1967 0.20%	8 out of 11955 0.07%	1	all-5206, n-27000, n-30580, n-30036
Molecular Function: RNA binding view genes	51 out of 1967 2.59%	241 out of 11955 2.02%	1	n-1564, n-782, s-53844, n-63930, n-14056, all-1029, all-25539, n-8798, n-48687, all-64882, n-47421, n-15728, n-17067, s-53286, n-38677, n-3855, all-40925, all-71465, n-32785, n-64080, n-17757, all-33588, all-57847, s-52454, all-65667, s-46841, all-25821, s-42, all-5974, n-32631, s-54546, all-574, n-2551, s-759, s-10080, all-28977, n-17856, all-71211, n-63036, s-4602, n-4175, all-3743, all-71031, …
Molecular Function: dynein intermediate chain binding view genes	3 out of 1967 0.15%	5 out of 11955 0.04%	1	n-10750, all-32073, n-35466
Molecular Function: Rho GTPase binding view genes	3 out of 1967 0.15%	5 out of 11955 0.04%	1	all-24565, n-5411, n-51841
Molecular Function: metalloexopeptidase activity view genes	3 out of 1967 0.15%	5 out of 11955 0.04%	1	all-13991, all-71314, n-17017
Molecular Function: retinal dehydrogenase activity view genes	3 out of 1967 0.15%	5 out of 11955 0.04%	1	all-53139, all-8410, s-16548
Molecular Function: kinase binding view genes	3 out of 1967 0.15%	5 out of 11955 0.04%	1	n-63944, s-25381, n-636
Molecular Function: asparaginase activity view genes	3 out of 1967 0.15%	5 out of 11955 0.04%	1	n-14184, n-3970, all-2544
Molecular Function: peroxiredoxin activity view genes	3 out of 1967 0.15%	5 out of 11955 0.04%	1	n-1822, n-18017, n-7650
Molecular Function: protein-arginine N-methyltransferase activity view genes	3 out of 1967 0.15%	5 out of 11955 0.04%	1	n-63585, all-9737, n-63287
Molecular Function: TBP-class protein binding view genes	3 out of 1967 0.15%	5 out of 11955 0.04%	1	n-39928, n-39587, n-14277
Molecular Function: transition metal ion binding view genes	5 out of 1967 0.25%	12 out of 11955 0.10%	1	n-63930, s-52477, all-70375, n-20246, n-2035
Molecular Function: myosin heavy chain kinase activity view genes	6 out of 1967 0.31%	16 out of 11955 0.13%	1	all-18102, n-63328, n-20104, all-64659, all-14321, all-548
Molecular Function: electron carrier activity view genes	15 out of 1967 0.76%	58 out of 11955 0.49%	1	all-24568, s-53402, n-7766, n-6026, n-62478, n-20663, n-19676, n-2255, all-10352, n-6363, n-30862, n-39577, s-4107, all-71788, all-27319
Molecular Function: ubiquitin protein ligase binding view genes	16 out of 1967 0.81%	63 out of 11955 0.53%	1	n-17867, s-32000, n-52116, all-18209, n-60063, all-51839, n-744, n-62938, n-20522, n-31669, all-16391, n-31748, n-20454, n-12907, n-1378, n-8371
Molecular Function: glutathione peroxidase activity view genes	4 out of 1967 0.20%	9 out of 11955 0.08%	1	n-7650, n-18017, s-50617, s-32443
Molecular Function: single-stranded RNA binding view genes	4 out of 1967 0.20%	9 out of 11955 0.08%	1	n-58032, all-37842, n-18788, n-1104
Molecular Function: myosin VI head/neck binding view genes	5 out of 1967 0.25%	13 out of 11955 0.11%	1	n-63007, n-12525, n-63292, n-37457, all-6262
Molecular Function: myosin V binding view genes	5 out of 1967 0.25%	13 out of 11955 0.11%	1	n-63007, n-12525, n-63292, n-37457, all-6262
Molecular Function: neurotransmitter receptor activity view genes	5 out of 1967 0.25%	13 out of 11955 0.11%	1	n-63736, n-10389, s-52677, all-45239, n-65013
Molecular Function: transcription coactivator activity view genes	8 out of 1967 0.41%	26 out of 11955 0.22%	1	all-63068, n-63644, all-71373, n-59272, s-35966, s-27830, n-39928, n-251
Molecular Function: peptidase activity, acting on L-amino acid peptides view genes	11 out of 1967 0.56%	40 out of 11955 0.33%	1	n-64651, n-64845, n-12410, all-5489, all-64054, all-35029, n-36943, n-63281, all-65383, s-53266, all-19796
Molecular Function: aconitate hydratase activity view genes	3 out of 1967 0.15%	6 out of 11955 0.05%	1	n-21238, n-12649, all-64882
Molecular Function: peptide binding view genes	3 out of 1967 0.15%	6 out of 11955 0.05%	1	all-31476, n-5155, n-47116
Molecular Function: calcium channel regulator activity view genes	3 out of 1967 0.15%	6 out of 11955 0.05%	1	n-36615, s-24471, all-56703
Molecular Function: gap junction hemi-channel activity view genes	3 out of 1967 0.15%	6 out of 11955 0.05%	1	n-64413, n-11, n-29092
Molecular Function: cGMP binding view genes	3 out of 1967 0.15%	6 out of 11955 0.05%	1	s-28159, all-2223, s-1027
Molecular Function: NADH dehydrogenase activity view genes	3 out of 1967 0.15%	6 out of 11955 0.05%	1	s-8743, n-5720, n-6510
Molecular Function: UDP-glycosyltransferase activity view genes	3 out of 1967 0.15%	6 out of 11955 0.05%	1	n-28771, n-62634, n-48413
Molecular Function: sequence-specific DNA binding view genes	53 out of 1967 2.69%	263 out of 11955 2.20%	1	n-6853, all-69496, n-8294, all-68520, all-37842, n-13111, s-25381, s-30312, all-3135, s-53227, s-52447, all-10334, n-27290, n-48006, all-3658, all-37835, s-23397, n-10173, s-31583, all-10565, n-14277, n-17468, all-32155, n-23546, n-20434, n-18126, all-31407, n-64112, n-64791, n-13110, all-45922, n-48616, all-23266, all-71373, n-21997, all-17023, all-57094, n-5430, n-19422, s-3842, s-12026, all-35…
Molecular Function: lipid binding view genes	8 out of 1967 0.41%	27 out of 11955 0.23%	1	all-3135, all-7991, n-45534, n-5430, all-951, n-7150, n-22553, n-64210
Molecular Function: protein transporter activity view genes	8 out of 1967 0.41%	27 out of 11955 0.23%	1	n-1685, n-61576, n-15646, s-32887, n-18484, all-23374, n-11701, all-34600
Molecular Function: G-protein coupled peptide receptor activity view genes	5 out of 1967 0.25%	14 out of 11955 0.12%	1	n-26265, n-17978, s-52677, all-45239, all-47748
Molecular Function: histone demethylase activity (H3-trimethyl-K4 specific) view genes	5 out of 1967 0.25%	14 out of 11955 0.12%	1	n-10704, all-23398, s-32872, s-18300, n-63454
Molecular Function: S-methyltransferase activity view genes	4 out of 1967 0.20%	10 out of 11955 0.08%	1	n-21063, all-8755, all-401, all-30792
Molecular Function: serine-type endopeptidase inhibitor activity view genes	4 out of 1967 0.20%	10 out of 11955 0.08%	1	all-25588, s-27176, all-70536, n-53067
Molecular Function: transcription regulatory region DNA binding view genes	4 out of 1967 0.20%	10 out of 11955 0.08%	1	all-3506, n-27290, s-25381, s-3842
Molecular Function: transcription corepressor activity view genes	4 out of 1967 0.20%	10 out of 11955 0.08%	1	n-50804, n-10830, n-34626, s-8644
Molecular Function: selenium binding view genes	2 out of 1967 0.10%	3 out of 11955 0.03%	1	all-58089, n-10709
Molecular Function: peptidyl-dipeptidase activity view genes	2 out of 1967 0.10%	3 out of 11955 0.03%	1	all-45919, all-5489
Molecular Function: thioredoxin peroxidase activity view genes	2 out of 1967 0.10%	3 out of 11955 0.03%	1	n-18017, n-7650
Molecular Function: glycine hydroxymethyltransferase activity view genes	2 out of 1967 0.10%	3 out of 11955 0.03%	1	all-71440, all-63998
Molecular Function: superoxide dismutase activity view genes	2 out of 1967 0.10%	3 out of 11955 0.03%	1	all-14638, n-23727
Molecular Function: pyruvate dehydrogenase (acetyl-transferring) activity view genes	2 out of 1967 0.10%	3 out of 11955 0.03%	1	n-24105, n-12212
Molecular Function: poly-pyrimidine tract binding view genes	2 out of 1967 0.10%	3 out of 11955 0.03%	1	all-63614, s-11690
Molecular Function: RNA methyltransferase activity view genes	2 out of 1967 0.10%	3 out of 11955 0.03%	1	all-1187, all-25821
Molecular Function: cyclosporin A binding view genes	2 out of 1967 0.10%	3 out of 11955 0.03%	1	s-11631, all-6890
Molecular Function: enoyl-CoA hydratase activity view genes	2 out of 1967 0.10%	3 out of 11955 0.03%	1	all-21443, n-64740
Molecular Function: translation initiation factor binding view genes	2 out of 1967 0.10%	3 out of 11955 0.03%	1	n-16246, all-44
Molecular Function: aminoacyl-tRNA hydrolase activity view genes	2 out of 1967 0.10%	3 out of 11955 0.03%	1	s-2027, all-22096
Molecular Function: glycoprotein-N-acetylgalactosamine 3-beta-galactosyltransferase activity view genes	2 out of 1967 0.10%	3 out of 11955 0.03%	1	n-2394, s-18850
Molecular Function: isocitrate dehydrogenase (NAD+) activity view genes	2 out of 1967 0.10%	3 out of 11955 0.03%	1	s-52709, n-7489
Molecular Function: histone demethylase activity (H3-K9 specific) view genes	2 out of 1967 0.10%	3 out of 11955 0.03%	1	n-47753, all-27738
Molecular Function: rRNA (adenine-N6,N6-)-dimethyltransferase activity view genes	2 out of 1967 0.10%	3 out of 11955 0.03%	1	n-9550, n-1590
Molecular Function: RNA polymerase II core promoter proximal region sequence-specific DNA binding transcription factor activity involved in negative regulation of transcription view genes	6 out of 1967 0.31%	19 out of 11955 0.16%	1	all-3135, s-35016, s-53787, n-48006, n-5430, all-3847
Molecular Function: GTPase activity view genes	38 out of 1967 1.93%	185 out of 11955 1.55%	1	n-51230, all-21894, all-66667, all-1645, s-2190, n-41609, n-45807, n-8506, n-46878, all-34491, n-26747, n-7289, n-26631, all-16793, n-20644, n-3855, n-47331, all-18209, n-19565, all-6355, n-34352, s-7760, all-32647, n-8371, s-6767, s-4038, all-46201, n-10182, all-9771, n-63067, all-246, all-9911, n-8232, n-636, n-60063, all-70856, n-33622, all-14682
Molecular Function: extracellular matrix structural constituent view genes	5 out of 1967 0.25%	15 out of 11955 0.13%	1	n-22004, all-57745, all-67766, n-35326, n-23890
Molecular Function: oxidoreductase activity, acting on paired donors, with incorporation or reduction of molecular oxygen, 2-oxoglutarate as one donor, and incorporation of one atom each of oxygen into both donors view genes	4 out of 1967 0.20%	11 out of 11955 0.09%	1	all-23398, all-45847, n-1659, s-18300
Molecular Function: adenylate kinase activity view genes	4 out of 1967 0.20%	11 out of 11955 0.09%	1	n-12168, all-38424, n-63296, n-60755
Molecular Function: arginine kinase activity view genes	3 out of 1967 0.15%	7 out of 11955 0.06%	1	n-18646, n-9249, n-6906
Molecular Function: antioxidant activity view genes	3 out of 1967 0.15%	7 out of 11955 0.06%	1	n-41301, n-36512, all-26475
Molecular Function: cAMP-dependent protein kinase regulator activity view genes	3 out of 1967 0.15%	7 out of 11955 0.06%	1	n-12168, s-21459, s-3898
Molecular Function: structural constituent of cytoskeleton view genes	14 out of 1967 0.71%	59 out of 11955 0.49%	1	n-7458, all-21894, n-65225, n-28033, all-35349, all-34491, s-3287, n-10182, n-34352, n-51756, s-7760, all-32647, s-52817, all-787
Molecular Function: G-protein coupled receptor activity view genes	13 out of 1967 0.66%	55 out of 11955 0.46%	1	n-63646, s-52770, all-5390, n-6943, n-63697, all-11205, n-31144, n-55328, n-7323, n-46856, n-29239, n-65013, n-25541
Molecular Function: methyltransferase activity view genes	17 out of 1967 0.86%	76 out of 11955 0.64%	1	n-13404, all-23398, all-63998, n-60655, all-30792, all-2634, n-53856, all-4774, s-5739, all-1339, all-3743, all-9737, n-63585, s-18300, n-9641, all-15764, all-71440
Molecular Function: dioxygenase activity view genes	4 out of 1967 0.20%	12 out of 11955 0.10%	1	all-24345, all-379, all-45847, n-833
Molecular Function: histone acetyltransferase activity (H3-K9 specific) view genes	4 out of 1967 0.20%	12 out of 11955 0.10%	1	n-10704, all-23398, s-18300, n-63454
Molecular Function: oxidoreductase activity, acting on paired donors, with incorporation or reduction of molecular oxygen, reduced ascorbate as one donor, and incorporation of one atom of oxygen view genes	4 out of 1967 0.20%	12 out of 11955 0.10%	1	all-21042, s-19821, n-20246, n-25650
Molecular Function: acid phosphatase activity view genes	2 out of 1967 0.10%	4 out of 11955 0.03%	1	n-19565, s-33871
Molecular Function: dynein binding view genes	2 out of 1967 0.10%	4 out of 11955 0.03%	1	s-33710, all-1221
Molecular Function: heparan sulfate 6-O-sulfotransferase activity view genes	2 out of 1967 0.10%	4 out of 11955 0.03%	1	n-64353, all-68903
Molecular Function: rRNA pseudouridylation guide activity view genes	2 out of 1967 0.10%	4 out of 11955 0.03%	1	n-13404, n-46047
Molecular Function: RNA 7-methylguanosine cap binding view genes	2 out of 1967 0.10%	4 out of 11955 0.03%	1	n-41494, n-2243
Molecular Function: ion gated channel activity view genes	2 out of 1967 0.10%	4 out of 11955 0.03%	1	all-2866, all-1148
Molecular Function: 3'-5'-exoribonuclease activity view genes	2 out of 1967 0.10%	4 out of 11955 0.03%	1	n-4782, n-20948
Molecular Function: (1->3)-beta-D-glucan binding view genes	2 out of 1967 0.10%	4 out of 11955 0.03%	1	all-14438, all-8514
Molecular Function: fatty-acyl-CoA binding view genes	2 out of 1967 0.10%	4 out of 11955 0.03%	1	all-7422, n-45534
Molecular Function: quinone binding view genes	2 out of 1967 0.10%	4 out of 11955 0.03%	1	all-14788, n-716
Molecular Function: peptide alpha-N-acetyltransferase activity view genes	2 out of 1967 0.10%	4 out of 11955 0.03%	1	n-18008, n-5354
Molecular Function: oxidoreductase activity, acting on the CH-NH2 group of donors, oxygen as acceptor view genes	3 out of 1967 0.15%	8 out of 11955 0.07%	1	n-17706, n-63948, all-10052
Molecular Function: kinesin binding view genes	3 out of 1967 0.15%	8 out of 11955 0.07%	1	all-70320, all-1454, n-57223
Molecular Function: phosphatidylinositol-3,4,5-trisphosphate binding view genes	3 out of 1967 0.15%	8 out of 11955 0.07%	1	all-5206, n-30036, s-15029
Molecular Function: RNA polymerase II transcription coactivator activity view genes	3 out of 1967 0.15%	8 out of 11955 0.07%	1	all-9431, all-9947, n-7469
Molecular Function: calmodulin binding view genes	17 out of 1967 0.86%	78 out of 11955 0.65%	1	all-66020, n-12525, all-6262, n-63930, n-26162, s-22282, n-63007, n-63292, s-12134, n-3855, n-37457, s-34185, n-19770, all-49335, n-329, n-54102, all-7753
Molecular Function: heterocyclic compound binding view genes	72 out of 1967 3.66%	386 out of 11955 3.23%	1	all-42886, n-3276, s-31142, all-19303, n-27371, s-5170, n-7691, s-17193, n-36384, all-58372, s-5140, n-3028, n-9828, all-70277, all-443, n-12219, n-40880, all-707, n-41312, all-71047, n-744, s-8011, all-2634, n-23445, all-18634, n-2787, all-8108, all-2147, n-63473, n-44875, n-48430, n-21831, all-2848, s-1365, n-14956, all-4818, all-20476, n-33977, n-20643, n-58974, all-36921, s-18206, all-3153, n…
Molecular Function: protein serine/threonine phosphatase activity view genes	5 out of 1967 0.25%	17 out of 11955 0.14%	1	s-6216, all-3392, n-7298, n-4235, n-22616
Molecular Function: substrate-specific transmembrane transporter activity view genes	5 out of 1967 0.25%	17 out of 11955 0.14%	1	all-49083, all-7656, all-50039, n-58930, all-12516
Molecular Function: phosphoprotein phosphatase activity view genes	16 out of 1967 0.81%	73 out of 11955 0.61%	1	all-66231, all-3435, n-55561, n-4235, s-347, all-25771, n-63232, s-12134, all-53692, n-21723, n-43641, n-64430, n-27676, s-52018, n-8360, s-33786
Molecular Function: pyridoxal phosphate binding view genes	12 out of 1967 0.61%	52 out of 11955 0.43%	1	all-6140, all-16714, n-8854, n-16405, all-63998, all-10618, n-10253, n-28498, all-19116, all-12268, all-71440, all-26112
Molecular Function: organic cyclic compound binding view genes	72 out of 1967 3.66%	387 out of 11955 3.24%	1	all-42886, n-3276, s-31142, all-19303, n-27371, s-5170, n-7691, s-17193, n-36384, all-58372, s-5140, n-3028, n-9828, all-70277, all-443, n-12219, n-40880, all-707, n-41312, all-71047, n-744, s-8011, all-2634, n-23445, all-18634, n-2787, all-8108, all-2147, n-63473, n-44875, n-48430, n-21831, all-2848, s-1365, n-14956, all-4818, all-20476, n-33977, n-20643, n-58974, all-36921, s-18206, all-3153, n…
Molecular Function: oxidoreductase activity, acting on the CH-CH group of donors view genes	6 out of 1967 0.31%	22 out of 11955 0.18%	1	all-22602, n-12821, all-2673, all-23403, all-68757, all-18043
Molecular Function: GTP binding view genes	50 out of 1967 2.54%	262 out of 11955 2.19%	1	n-51230, all-21894, all-1645, s-2190, n-41609, n-46878, all-34491, s-30413, n-26747, n-47331, all-18209, n-19565, n-18665, n-34352, s-7760, all-54587, all-32647, n-63501, s-6767, s-4038, n-3573, n-10182, n-63067, all-5339, all-9911, n-8232, n-636, n-62860, n-45807, n-8506, n-7289, n-26631, n-20644, s-36081, n-12253, all-6355, all-2891, n-8371, n-46953, all-46201, all-58490, s-12090, n-827, all-24…
Molecular Function: 4 iron, 4 sulfur cluster binding view genes	7 out of 1967 0.36%	27 out of 11955 0.23%	1	all-10486, n-12649, n-9530, all-64882, n-716, s-53443, n-21238
Molecular Function: RNA polymerase II distal enhancer sequence-specific DNA binding view genes	5 out of 1967 0.25%	18 out of 11955 0.15%	1	s-11194, s-53787, all-9947, all-3847, all-9431
Molecular Function: aminopeptidase activity view genes	5 out of 1967 0.25%	18 out of 11955 0.15%	1	n-17017, s-1550, n-19911, all-71314, all-13991
Molecular Function: NADP binding view genes	5 out of 1967 0.25%	18 out of 11955 0.15%	1	n-6750, s-28774, n-20663, all-71805, n-6775
Molecular Function: NAD binding view genes	8 out of 1967 0.41%	33 out of 11955 0.28%	1	n-16133, all-10486, s-54497, s-52709, n-7489, n-313, all-14788, n-62733
Molecular Function: cysteine-type endopeptidase inhibitor activity involved in apoptotic process view genes	1 out of 1967 0.05%	1 out of 11955 0.01%	1	n-6448
Molecular Function: sulfite oxidase activity view genes	1 out of 1967 0.05%	1 out of 11955 0.01%	1	all-8744
Molecular Function: 1,4-alpha-glucan branching enzyme activity view genes	1 out of 1967 0.05%	1 out of 11955 0.01%	1	n-3441
Molecular Function: hydrogen-exporting ATPase activity, phosphorylative mechanism view genes	1 out of 1967 0.05%	1 out of 11955 0.01%	1	n-16836
Molecular Function: oligosaccharyl transferase activity view genes	1 out of 1967 0.05%	1 out of 11955 0.01%	1	s-45476
Molecular Function: acryloyl-CoA reductase activity view genes	1 out of 1967 0.05%	1 out of 11955 0.01%	1	all-51772
Molecular Function: beta-ureidopropionase activity view genes	1 out of 1967 0.05%	1 out of 11955 0.01%	1	n-35990
Molecular Function: dihydrolipoyllysine-residue acetyltransferase activity view genes	1 out of 1967 0.05%	1 out of 11955 0.01%	1	n-14589
Molecular Function: alditol:NADP+ 1-oxidoreductase activity view genes	1 out of 1967 0.05%	1 out of 11955 0.01%	1	s-4890
Molecular Function: 7SK snRNA binding view genes	1 out of 1967 0.05%	1 out of 11955 0.01%	1	s-3713
Molecular Function: alkyl sulfatase activity view genes	1 out of 1967 0.05%	1 out of 11955 0.01%	1	n-64353
Molecular Function: methyl jasmonate esterase activity view genes	1 out of 1967 0.05%	1 out of 11955 0.01%	1	n-64791
Molecular Function: oxidoreductase activity, acting on single donors with incorporation of molecular oxygen view genes	1 out of 1967 0.05%	1 out of 11955 0.01%	1	s-41855
Molecular Function: ornithine decarboxylase inhibitor activity view genes	1 out of 1967 0.05%	1 out of 11955 0.01%	1	s-28681
Molecular Function: long-chain-3-hydroxyacyl-CoA dehydrogenase activity view genes	1 out of 1967 0.05%	1 out of 11955 0.01%	1	s-39496
Molecular Function: steroid dehydrogenase activity view genes	1 out of 1967 0.05%	1 out of 11955 0.01%	1	n-20654
Molecular Function: GPI-anchor transamidase activity view genes	1 out of 1967 0.05%	1 out of 11955 0.01%	1	all-71051
Molecular Function: aminoacylase activity view genes	1 out of 1967 0.05%	1 out of 11955 0.01%	1	n-62266
Molecular Function: bisphosphoglycerate mutase activity view genes	1 out of 1967 0.05%	1 out of 11955 0.01%	1	n-7095
Molecular Function: ATPase inhibitor activity view genes	1 out of 1967 0.05%	1 out of 11955 0.01%	1	s-2898
Molecular Function: protein serine/threonine kinase activator activity view genes	1 out of 1967 0.05%	1 out of 11955 0.01%	1	n-55561
Molecular Function: malonate-semialdehyde dehydrogenase (acetylating) activity view genes	1 out of 1967 0.05%	1 out of 11955 0.01%	1	all-7422
Molecular Function: polyubiquitin binding view genes	1 out of 1967 0.05%	1 out of 11955 0.01%	1	all-54344
Molecular Function: nucleocytoplasmic transporter activity view genes	1 out of 1967 0.05%	1 out of 11955 0.01%	1	n-62944
Molecular Function: methylmalonate-semialdehyde dehydrogenase (acylating) activity view genes	1 out of 1967 0.05%	1 out of 11955 0.01%	1	all-7422
Molecular Function: phosphoglycerate dehydrogenase activity view genes	1 out of 1967 0.05%	1 out of 11955 0.01%	1	n-16133
Molecular Function: nucleotidase activity view genes	1 out of 1967 0.05%	1 out of 11955 0.01%	1	n-4717
Molecular Function: tryptophan 5-monooxygenase activity view genes	1 out of 1967 0.05%	1 out of 11955 0.01%	1	n-63428
Molecular Function: xylose isomerase activity view genes	1 out of 1967 0.05%	1 out of 11955 0.01%	1	s-14263
Molecular Function: alcohol dehydrogenase (NAD) activity view genes	1 out of 1967 0.05%	1 out of 11955 0.01%	1	all-14339
Molecular Function: anion:anion antiporter activity view genes	1 out of 1967 0.05%	1 out of 11955 0.01%	1	all-13517
Molecular Function: phosphoribosylaminoimidazole carboxylase activity view genes	1 out of 1967 0.05%	1 out of 11955 0.01%	1	n-43593
Molecular Function: glutaryl-CoA dehydrogenase activity view genes	1 out of 1967 0.05%	1 out of 11955 0.01%	1	n-63596
Molecular Function: D-cysteine desulfhydrase activity view genes	1 out of 1967 0.05%	1 out of 11955 0.01%	1	all-34600
Molecular Function: retinyl-palmitate esterase activity view genes	1 out of 1967 0.05%	1 out of 11955 0.01%	1	n-64791
Molecular Function: O-fucosylpeptide 3-beta-N-acetylglucosaminyltransferase activity view genes	1 out of 1967 0.05%	1 out of 11955 0.01%	1	n-3514
Molecular Function: UDP-N-acetylglucosamine 1-carboxyvinyltransferase activity view genes	1 out of 1967 0.05%	1 out of 11955 0.01%	1	n-10926
Molecular Function: long-chain-enoyl-CoA hydratase activity view genes	1 out of 1967 0.05%	1 out of 11955 0.01%	1	s-39496
Molecular Function: tryptophan-tRNA ligase activity view genes	1 out of 1967 0.05%	1 out of 11955 0.01%	1	s-9507
Molecular Function: glucuronosyl-N-acetylgalactosaminyl-proteoglycan 4-beta-N-acetylgalactosaminyltransferase activity view genes	1 out of 1967 0.05%	1 out of 11955 0.01%	1	s-18850
Molecular Function: translation release factor activity, codon specific view genes	1 out of 1967 0.05%	1 out of 11955 0.01%	1	n-2800
Molecular Function: lipoate synthase activity view genes	1 out of 1967 0.05%	1 out of 11955 0.01%	1	s-53443
Molecular Function: FK506 binding view genes	1 out of 1967 0.05%	1 out of 11955 0.01%	1	all-3153
Molecular Function: lysine-tRNA ligase activity view genes	1 out of 1967 0.05%	1 out of 11955 0.01%	1	all-46201
Molecular Function: troponin C binding view genes	1 out of 1967 0.05%	1 out of 11955 0.01%	1	s-1608
Molecular Function: small conjugating protein ligase activity view genes	1 out of 1967 0.05%	1 out of 11955 0.01%	1	all-70433
Molecular Function: L-aspartate:2-oxoglutarate aminotransferase activity view genes	1 out of 1967 0.05%	1 out of 11955 0.01%	1	n-8854
Molecular Function: ER retention sequence binding view genes	1 out of 1967 0.05%	1 out of 11955 0.01%	1	n-3761
Molecular Function: cAMP binding view genes	1 out of 1967 0.05%	1 out of 11955 0.01%	1	s-3898
Molecular Function: semaphorin receptor activity view genes	1 out of 1967 0.05%	1 out of 11955 0.01%	1	all-10057
Molecular Function: Ala-tRNA(Pro) hydrolase activity view genes	1 out of 1967 0.05%	1 out of 11955 0.01%	1	n-48297
Molecular Function: clathrin heavy chain binding view genes	1 out of 1967 0.05%	1 out of 11955 0.01%	1	all-71638
Molecular Function: glutathione-disulfide reductase activity view genes	1 out of 1967 0.05%	1 out of 11955 0.01%	1	n-6775
Molecular Function: glutamine-tRNA ligase activity view genes	1 out of 1967 0.05%	1 out of 11955 0.01%	1	all-1340
Molecular Function: oxidoreductase activity, acting on diphenols and related substances as donors view genes	1 out of 1967 0.05%	1 out of 11955 0.01%	1	all-58647
Molecular Function: malate synthase activity view genes	1 out of 1967 0.05%	1 out of 11955 0.01%	1	all-51921
Molecular Function: methyl indole-3-acetate esterase activity view genes	1 out of 1967 0.05%	1 out of 11955 0.01%	1	n-64791
Molecular Function: 5-methyltetrahydropteroyltriglutamate-homocysteine S-methyltransferase activity view genes	1 out of 1967 0.05%	1 out of 11955 0.01%	1	all-1283
Molecular Function: fumarylacetoacetase activity view genes	1 out of 1967 0.05%	1 out of 11955 0.01%	1	all-57075
Molecular Function: N-acetylglucosamine-6-sulfatase activity view genes	1 out of 1967 0.05%	1 out of 11955 0.01%	1	n-64353
Molecular Function: translation activator activity view genes	1 out of 1967 0.05%	1 out of 11955 0.01%	1	all-31495
Molecular Function: DNA polymerase processivity factor activity view genes	1 out of 1967 0.05%	1 out of 11955 0.01%	1	n-12764
Molecular Function: potassium ion binding view genes	1 out of 1967 0.05%	1 out of 11955 0.01%	1	n-42871
Molecular Function: tyrosine 3-monooxygenase activity view genes	1 out of 1967 0.05%	1 out of 11955 0.01%	1	n-63428
Molecular Function: isocitrate hydro-lyase (cis-aconitate-forming) activity view genes	1 out of 1967 0.05%	1 out of 11955 0.01%	1	all-64882
Molecular Function: uridine phosphorylase activity view genes	1 out of 1967 0.05%	1 out of 11955 0.01%	1	s-41424
Molecular Function: diphthine synthase activity view genes	1 out of 1967 0.05%	1 out of 11955 0.01%	1	all-3081
Molecular Function: histone acetyltransferase binding view genes	1 out of 1967 0.05%	1 out of 11955 0.01%	1	n-40204
Molecular Function: phosphoribosylaminoimidazolecarboxamide formyltransferase activity view genes	1 out of 1967 0.05%	1 out of 11955 0.01%	1	all-21641
Molecular Function: glucuronosyltransferase activity view genes	1 out of 1967 0.05%	1 out of 11955 0.01%	1	all-70534
Molecular Function: mRNA (2'-O-methyladenosine-N6-)-methyltransferase activity view genes	1 out of 1967 0.05%	1 out of 11955 0.01%	1	all-3743
Molecular Function: tripeptidase activity view genes	1 out of 1967 0.05%	1 out of 11955 0.01%	1	all-17481
Molecular Function: IMP cyclohydrolase activity view genes	1 out of 1967 0.05%	1 out of 11955 0.01%	1	all-21641
Molecular Function: glucose-6-phosphate dehydrogenase activity view genes	1 out of 1967 0.05%	1 out of 11955 0.01%	1	all-71805
Molecular Function: Rap GTPase activator activity view genes	1 out of 1967 0.05%	1 out of 11955 0.01%	1	n-1850
Molecular Function: NAD(P)+ transhydrogenase (AB-specific) activity view genes	1 out of 1967 0.05%	1 out of 11955 0.01%	1	s-28774
Molecular Function: ACP phosphopantetheine attachment site binding involved in fatty acid biosynthetic process view genes	1 out of 1967 0.05%	1 out of 11955 0.01%	1	n-5512
Molecular Function: 5-(carboxyamino)imidazole ribonucleotide mutase activity view genes	1 out of 1967 0.05%	1 out of 11955 0.01%	1	n-43593
Molecular Function: KDEL sequence binding view genes	1 out of 1967 0.05%	1 out of 11955 0.01%	1	n-3761
Molecular Function: selenide, water dikinase activity view genes	1 out of 1967 0.05%	1 out of 11955 0.01%	1	n-6393
Molecular Function: metallochaperone activity view genes	1 out of 1967 0.05%	1 out of 11955 0.01%	1	all-9771
Molecular Function: alpha-catenin binding view genes	1 out of 1967 0.05%	1 out of 11955 0.01%	1	n-7469
Molecular Function: phosphoribosylaminoimidazolesuccinocarboxamide synthase activity view genes	1 out of 1967 0.05%	1 out of 11955 0.01%	1	n-43593
Molecular Function: CoA carboxylase activity view genes	1 out of 1967 0.05%	1 out of 11955 0.01%	1	all-66544
Molecular Function: glutamine-fructose-6-phosphate transaminase (isomerizing) activity view genes	1 out of 1967 0.05%	1 out of 11955 0.01%	1	all-452
Molecular Function: tryptophan 2,3-dioxygenase activity view genes	1 out of 1967 0.05%	1 out of 11955 0.01%	1	s-53787
Molecular Function: translation repressor activity view genes	1 out of 1967 0.05%	1 out of 11955 0.01%	1	n-46420
Molecular Function: ceramidase activity view genes	1 out of 1967 0.05%	1 out of 11955 0.01%	1	all-71291
Molecular Function: diazepam binding view genes	1 out of 1967 0.05%	1 out of 11955 0.01%	1	n-45534
Molecular Function: tyrosine-tRNA ligase activity view genes	1 out of 1967 0.05%	1 out of 11955 0.01%	1	n-2787
Molecular Function: threonine-tRNA ligase activity view genes	1 out of 1967 0.05%	1 out of 11955 0.01%	1	s-39216
Molecular Function: bisphosphoglycerate 2-phosphatase activity view genes	1 out of 1967 0.05%	1 out of 11955 0.01%	1	n-7095
Molecular Function: 5-aminolevulinate synthase activity view genes	1 out of 1967 0.05%	1 out of 11955 0.01%	1	all-16714
Molecular Function: prenylated protein tyrosine phosphatase activity view genes	1 out of 1967 0.05%	1 out of 11955 0.01%	1	n-31597
Molecular Function: nickel cation binding view genes	1 out of 1967 0.05%	1 out of 11955 0.01%	1	all-9771
Molecular Function: deoxyribose-phosphate aldolase activity view genes	1 out of 1967 0.05%	1 out of 11955 0.01%	1	n-43930
Molecular Function: formyl-CoA transferase activity view genes	1 out of 1967 0.05%	1 out of 11955 0.01%	1	n-45090
Molecular Function: UDP-N-acetylmuramoylalanyl-D-glutamyl-2,6-diaminopimelate-D-alanyl-D-alanine ligase activity view genes	1 out of 1967 0.05%	1 out of 11955 0.01%	1	all-17059
Molecular Function: mannan endo-1,4-beta-mannosidase activity view genes	1 out of 1967 0.05%	1 out of 11955 0.01%	1	all-12006
Molecular Function: phosphatidylethanolamine binding view genes	1 out of 1967 0.05%	1 out of 11955 0.01%	1	all-71254
Molecular Function: axon guidance receptor activity view genes	1 out of 1967 0.05%	1 out of 11955 0.01%	1	all-10057
Molecular Function: methyl salicylate esterase activity view genes	1 out of 1967 0.05%	1 out of 11955 0.01%	1	n-64791
Molecular Function: phenylalanine 4-monooxygenase activity view genes	1 out of 1967 0.05%	1 out of 11955 0.01%	1	n-63428
Molecular Function: succinate-CoA ligase activity view genes	1 out of 1967 0.05%	1 out of 11955 0.01%	1	all-1279
Molecular Function: L-phenylalanine:2-oxoglutarate aminotransferase activity view genes	1 out of 1967 0.05%	1 out of 11955 0.01%	1	n-8854
Molecular Function: acylglycerol lipase activity view genes	1 out of 1967 0.05%	1 out of 11955 0.01%	1	all-53518
Molecular Function: protein-N-terminal asparagine amidohydrolase activity view genes	1 out of 1967 0.05%	1 out of 11955 0.01%	1	n-3970
Molecular Function: dihydrolipoyllysine-residue succinyltransferase activity view genes	1 out of 1967 0.05%	1 out of 11955 0.01%	1	n-63364
Molecular Function: protein binding involved in protein folding view genes	1 out of 1967 0.05%	1 out of 11955 0.01%	1	n-1659
Molecular Function: phosphopantetheine binding view genes	1 out of 1967 0.05%	1 out of 11955 0.01%	1	n-5512
Molecular Function: dihydropyrimidinase activity view genes	1 out of 1967 0.05%	1 out of 11955 0.01%	1	all-56166
Molecular Function: cystathionine beta-synthase activity view genes	1 out of 1967 0.05%	1 out of 11955 0.01%	1	s-53446
Molecular Function: phosphatase regulator activity view genes	3 out of 1967 0.15%	9 out of 11955 0.08%	1	n-4235, s-6216, s-52018
Molecular Function: myosin heavy chain binding view genes	3 out of 1967 0.15%	9 out of 11955 0.08%	1	all-3161, n-14874, n-58430
Molecular Function: peptidyl-proline 4-dioxygenase activity view genes	3 out of 1967 0.15%	9 out of 11955 0.08%	1	all-379, n-39577, n-2080
Molecular Function: identical protein binding view genes	18 out of 1967 0.92%	87 out of 11955 0.73%	1	n-28240, n-45259, s-32000, n-20454, n-12907, all-27778, s-1550, n-21270, all-39198, n-52116, all-56703, n-27298, n-1915, n-62938, n-43593, all-16391, n-17758, n-1378
Molecular Function: RNA polymerase II core promoter sequence-specific DNA binding transcription factor activity involved in preinitiation complex assembly view genes	4 out of 1967 0.20%	14 out of 11955 0.12%	1	all-54229, n-25620, n-53972, all-3658
Molecular Function: heme binding view genes	11 out of 1967 0.56%	50 out of 11955 0.42%	1	all-24568, s-53787, s-31024, n-62478, n-63930, n-19676, all-10352, n-6363, all-71788, n-21997, all-26007
Molecular Function: endonuclease activity view genes	5 out of 1967 0.25%	19 out of 11955 0.16%	1	all-8556, n-3128, n-7585, s-54212, s-15999
Molecular Function: repressing transcription factor binding view genes	5 out of 1967 0.25%	19 out of 11955 0.16%	1	s-46029, n-64112, all-37835, s-25381, n-3885
Molecular Function: carboxylic ester hydrolase activity view genes	5 out of 1967 0.25%	19 out of 11955 0.16%	1	all-27613, n-16810, all-27778, all-57616, n-16503
Molecular Function: glycerol-3-phosphate dehydrogenase [NAD+] activity view genes	2 out of 1967 0.10%	5 out of 11955 0.04%	1	s-54497, n-313
Molecular Function: fumarate hydratase activity view genes	2 out of 1967 0.10%	5 out of 11955 0.04%	1	all-47288, all-827
Molecular Function: oxidoreductase activity, acting on NAD(P)H view genes	2 out of 1967 0.10%	5 out of 11955 0.04%	1	n-6026, n-9808
Molecular Function: RNA polymerase II activating transcription factor binding view genes	2 out of 1967 0.10%	5 out of 11955 0.04%	1	all-9947, all-9431
Molecular Function: thioredoxin-disulfide reductase activity view genes	2 out of 1967 0.10%	5 out of 11955 0.04%	1	n-6775, n-20663
Molecular Function: transforming growth factor beta receptor, pathway-specific cytoplasmic mediator activity view genes	2 out of 1967 0.10%	5 out of 11955 0.04%	1	all-9947, all-9431
Molecular Function: ATP-dependent 5'-3' DNA helicase activity view genes	2 out of 1967 0.10%	5 out of 11955 0.04%	1	n-39928, n-10830
Molecular Function: hexokinase activity view genes	2 out of 1967 0.10%	5 out of 11955 0.04%	1	s-11711, n-32632
Molecular Function: nucleosome binding view genes	2 out of 1967 0.10%	5 out of 11955 0.04%	1	n-40204, n-36316
Molecular Function: cholinesterase activity view genes	2 out of 1967 0.10%	5 out of 11955 0.04%	1	all-63315, all-20611
Molecular Function: muscle alpha-actinin binding view genes	2 out of 1967 0.10%	5 out of 11955 0.04%	1	n-37945, all-7482
Molecular Function: snoRNA binding view genes	2 out of 1967 0.10%	5 out of 11955 0.04%	1	n-13404, n-46047
Molecular Function: RNA polymerase II distal enhancer sequence-specific DNA binding transcription factor activity view genes	28 out of 1967 1.42%	145 out of 11955 1.21%	1	n-6853, all-69496, all-71373, all-9947, n-21997, all-17023, s-53787, all-3847, s-25381, s-52447, all-57094, n-19422, s-23397, n-19317, all-48671, all-10565, all-9593, n-50430, s-22308, n-17468, n-6618, s-35966, all-9431, n-23546, s-22035, n-18126, all-31407, all-45922
Molecular Function: ATPase activity, coupled view genes	10 out of 1967 0.51%	46 out of 11955 0.38%	1	all-7599, n-28240, n-10750, all-5871, all-32073, n-24045, all-1221, n-48687, n-1915, n-20388
Molecular Function: microtubule-severing ATPase activity view genes	3 out of 1967 0.15%	10 out of 11955 0.08%	1	n-12907, n-62938, n-12286
Molecular Function: phospholipase A2 activity view genes	4 out of 1967 0.20%	15 out of 11955 0.13%	1	n-65359, all-16357, s-13486, n-64471
Molecular Function: transferase activity, transferring acyl groups other than amino-acyl groups view genes	4 out of 1967 0.20%	15 out of 11955 0.13%	1	s-46815, all-7298, n-48696, all-6721
Molecular Function: carbohydrate binding view genes	15 out of 1967 0.76%	74 out of 11955 0.62%	1	all-11004, n-43878, s-33128, all-476, all-3206, all-7421, all-452, n-47501, s-5608, s-25353, n-43621, n-23717, all-23397, all-29393, all-597
Molecular Function: cAMP-dependent protein kinase activity view genes	6 out of 1967 0.31%	26 out of 11955 0.22%	1	n-17108, s-28159, all-2223, n-14568, all-12475, s-3898
Molecular Function: binding view genes	243 out of 1967 12.35%	1422 out of 11955 11.89%	1	n-24017, all-69496, s-2927, all-15401, all-4385, s-22692, all-13316, n-27371, all-264, s-11978, n-5173, n-15989, s-3400, all-3322, all-9056, all-4397, n-30205, all-71359, all-7218, all-8595, all-1880, n-2342, all-4119, s-8644, n-64437, n-1233, n-6050, s-33580, all-8699, all-19383, all-66231, n-65318, n-40124, all-41206, n-22403, all-7485, all-7057, all-65024, n-43253, n-9669, all-5127, all-19199,…
Molecular Function: histone deacetylase binding view genes	2 out of 1967 0.10%	6 out of 11955 0.05%	1	all-3847, n-40204
Molecular Function: dopamine neurotransmitter receptor activity, coupled via Gs view genes	2 out of 1967 0.10%	6 out of 11955 0.05%	1	all-69931, all-4586
Molecular Function: nicotinate phosphoribosyltransferase activity view genes	2 out of 1967 0.10%	6 out of 11955 0.05%	1	n-14347, n-53207
Molecular Function: ATPase activity, coupled to transmembrane movement of ions, phosphorylative mechanism view genes	2 out of 1967 0.10%	6 out of 11955 0.05%	1	n-613, s-53686
Molecular Function: metal ion transmembrane transporter activity view genes	2 out of 1967 0.10%	6 out of 11955 0.05%	1	s-53686, all-68067
Molecular Function: glycerol-3-phosphate dehydrogenase activity view genes	2 out of 1967 0.10%	6 out of 11955 0.05%	1	n-3492, n-65004
Molecular Function: protein disulfide oxidoreductase activity view genes	4 out of 1967 0.20%	16 out of 11955 0.13%	1	n-39577, n-2080, s-53378, n-20663
Molecular Function: hormone activity view genes	3 out of 1967 0.15%	11 out of 11955 0.09%	1	all-19303, s-29805, all-2848
Molecular Function: RNA polymerase II core promoter proximal region sequence-specific DNA binding transcription factor activity involved in positive regulation of transcription view genes	20 out of 1967 1.02%	105 out of 11955 0.88%	1	s-46029, n-6853, all-37835, s-23397, n-19317, n-3885, s-31583, all-1698, all-9593, n-6618, all-3847, s-25381, n-23546, s-22035, all-57094, n-18126, all-31407, n-64112, n-19422, all-45922
Molecular Function: transcription factor binding view genes	34 out of 1967 1.73%	186 out of 11955 1.56%	1	all-66020, n-25620, n-4996, all-69496, all-64659, all-68520, n-24045, all-17023, n-53972, n-19525, s-53787, s-11917, all-57115, all-22730, n-60815, n-7672, n-34626, n-48006, all-3658, all-44358, all-54279, all-48671, n-50804, all-10565, n-36316, n-50430, all-6644, s-22308, all-2869, n-17468, all-3392, s-35966, n-7469, all-4574
Molecular Function: oxidoreductase activity, acting on paired donors, with incorporation or reduction of molecular oxygen view genes	10 out of 1967 0.51%	49 out of 11955 0.41%	1	all-24568, s-53402, n-19676, all-10352, n-6363, s-12271, all-379, n-833, all-45847, all-14711
Molecular Function: RNA polymerase II transcription cofactor activity view genes	8 out of 1967 0.41%	38 out of 11955 0.32%	1	all-7147, all-39277, n-6807, all-20403, n-4268, n-12540, n-63644, all-46703
Molecular Function: cation channel activity view genes	14 out of 1967 0.71%	72 out of 11955 0.60%	1	all-1721, all-5220, n-30100, n-2447, n-59916, n-39115, n-2829, n-698, all-60334, all-2866, all-68813, s-38557, all-55589, s-27996
Molecular Function: alcohol dehydrogenase activity, zinc-dependent view genes	1 out of 1967 0.05%	2 out of 11955 0.02%	1	all-14339
Molecular Function: cytochrome-b5 reductase activity, acting on NAD(P)H view genes	1 out of 1967 0.05%	2 out of 11955 0.02%	1	all-9412
Molecular Function: glutamate dehydrogenase (NAD+) activity view genes	1 out of 1967 0.05%	2 out of 11955 0.02%	1	n-313
Molecular Function: cysteine desulfurase activity view genes	1 out of 1967 0.05%	2 out of 11955 0.02%	1	n-28498
Molecular Function: JUN kinase kinase activity view genes	1 out of 1967 0.05%	2 out of 11955 0.02%	1	s-20280
Molecular Function: phosphoglycerate kinase activity view genes	1 out of 1967 0.05%	2 out of 11955 0.02%	1	n-41709
Molecular Function: inositol hexakisphosphate 5-kinase activity view genes	1 out of 1967 0.05%	2 out of 11955 0.02%	1	s-33871
Molecular Function: glutamate dehydrogenase [NAD(P)+] activity view genes	1 out of 1967 0.05%	2 out of 11955 0.02%	1	n-313
Molecular Function: 1-phosphatidylinositol-3-kinase activity view genes	1 out of 1967 0.05%	2 out of 11955 0.02%	1	all-42436
Molecular Function: phosphogluconate dehydrogenase (decarboxylating) activity view genes	1 out of 1967 0.05%	2 out of 11955 0.02%	1	n-6750
Molecular Function: phosphomannomutase activity view genes	1 out of 1967 0.05%	2 out of 11955 0.02%	1	all-17613
Molecular Function: 1-phosphatidylinositol binding view genes	1 out of 1967 0.05%	2 out of 11955 0.02%	1	all-71254
Molecular Function: beta-glucuronidase activity view genes	1 out of 1967 0.05%	2 out of 11955 0.02%	1	all-15710
Molecular Function: 14-3-3 protein binding view genes	1 out of 1967 0.05%	2 out of 11955 0.02%	1	all-10057
Molecular Function: ubiquitin-ubiquitin ligase activity view genes	1 out of 1967 0.05%	2 out of 11955 0.02%	1	all-18605
Molecular Function: glycine dehydrogenase (decarboxylating) activity view genes	1 out of 1967 0.05%	2 out of 11955 0.02%	1	all-10618
Molecular Function: glucokinase activity view genes	1 out of 1967 0.05%	2 out of 11955 0.02%	1	s-11711
Molecular Function: pyruvate kinase activity view genes	1 out of 1967 0.05%	2 out of 11955 0.02%	1	n-42871
Molecular Function: inositol-1,3,4,5,6-pentakisphosphate kinase activity view genes	1 out of 1967 0.05%	2 out of 11955 0.02%	1	s-33871
Molecular Function: 3R-hydroxyacyl-CoA dehydratase activity view genes	1 out of 1967 0.05%	2 out of 11955 0.02%	1	n-64740
Molecular Function: glucose dehydrogenase activity view genes	1 out of 1967 0.05%	2 out of 11955 0.02%	1	n-313
Molecular Function: O-methyltransferase activity view genes	1 out of 1967 0.05%	2 out of 11955 0.02%	1	all-1187
Molecular Function: single-stranded DNA 3'-5' exodeoxyribonuclease activity view genes	1 out of 1967 0.05%	2 out of 11955 0.02%	1	n-20948
Molecular Function: snRNA binding view genes	1 out of 1967 0.05%	2 out of 11955 0.02%	1	all-51606
Molecular Function: S-(hydroxymethyl)glutathione dehydrogenase activity view genes	1 out of 1967 0.05%	2 out of 11955 0.02%	1	all-14339
Molecular Function: oligonucleotidase activity view genes	1 out of 1967 0.05%	2 out of 11955 0.02%	1	n-4782
Molecular Function: dopamine beta-monooxygenase activity view genes	1 out of 1967 0.05%	2 out of 11955 0.02%	1	s-7097
Molecular Function: odorant binding view genes	1 out of 1967 0.05%	2 out of 11955 0.02%	1	n-1685
Molecular Function: 4-aminobutyrate transaminase activity view genes	1 out of 1967 0.05%	2 out of 11955 0.02%	1	n-63129
Molecular Function: succinate-semialdehyde dehydrogenase (NAD+) activity view genes	1 out of 1967 0.05%	2 out of 11955 0.02%	1	all-2147
Molecular Function: phosphate ion transmembrane transporter activity view genes	1 out of 1967 0.05%	2 out of 11955 0.02%	1	n-53233
Molecular Function: 5S rRNA binding view genes	1 out of 1967 0.05%	2 out of 11955 0.02%	1	s-52233
Molecular Function: double-stranded DNA 3'-5' exodeoxyribonuclease activity view genes	1 out of 1967 0.05%	2 out of 11955 0.02%	1	n-20948
Molecular Function: citrate (Si)-synthase activity view genes	1 out of 1967 0.05%	2 out of 11955 0.02%	1	n-2058
Molecular Function: rRNA (uridine-2'-O-)-methyltransferase activity view genes	1 out of 1967 0.05%	2 out of 11955 0.02%	1	all-4774
Molecular Function: polyamine oxidase activity view genes	1 out of 1967 0.05%	2 out of 11955 0.02%	1	all-2634
Molecular Function: glucose-6-phosphate isomerase activity view genes	1 out of 1967 0.05%	2 out of 11955 0.02%	1	n-33209
Molecular Function: dihydropyrimidine dehydrogenase (NADP+) activity view genes	1 out of 1967 0.05%	2 out of 11955 0.02%	1	all-21292
Molecular Function: formyltetrahydrofolate dehydrogenase activity view genes	1 out of 1967 0.05%	2 out of 11955 0.02%	1	all-1339
Molecular Function: phosphoric ester hydrolase activity view genes	1 out of 1967 0.05%	2 out of 11955 0.02%	1	all-40707
Molecular Function: thymidylate synthase activity view genes	1 out of 1967 0.05%	2 out of 11955 0.02%	1	s-5739
Molecular Function: diphosphoinositol-pentakisphosphate kinase activity view genes	1 out of 1967 0.05%	2 out of 11955 0.02%	1	s-33871
Molecular Function: AMP deaminase activity view genes	1 out of 1967 0.05%	2 out of 11955 0.02%	1	all-14748
Molecular Function: GMP reductase activity view genes	1 out of 1967 0.05%	2 out of 11955 0.02%	1	all-10826
Molecular Function: mannokinase activity view genes	1 out of 1967 0.05%	2 out of 11955 0.02%	1	s-11711
Molecular Function: UDP-glucose 4-epimerase activity view genes	1 out of 1967 0.05%	2 out of 11955 0.02%	1	all-29299
Molecular Function: methionine adenosyltransferase activity view genes	1 out of 1967 0.05%	2 out of 11955 0.02%	1	s-51761
Molecular Function: asparagine-tRNA ligase activity view genes	1 out of 1967 0.05%	2 out of 11955 0.02%	1	n-1183
Molecular Function: S-formylglutathione hydrolase activity view genes	1 out of 1967 0.05%	2 out of 11955 0.02%	1	n-64791
Molecular Function: sedoheptulose-7-phosphate:D-glyceraldehyde-3-phosphate glyceronetransferase activity view genes	1 out of 1967 0.05%	2 out of 11955 0.02%	1	all-4888
Molecular Function: peptidylamidoglycolate lyase activity view genes	1 out of 1967 0.05%	2 out of 11955 0.02%	1	n-820
Molecular Function: 3',5'-cyclic-AMP phosphodiesterase activity view genes	1 out of 1967 0.05%	2 out of 11955 0.02%	1	n-61830
Molecular Function: fructose 1,6-bisphosphate 1-phosphatase activity view genes	1 out of 1967 0.05%	2 out of 11955 0.02%	1	all-35933
Molecular Function: calcium-dependent protein serine/threonine phosphatase regulator activity view genes	1 out of 1967 0.05%	2 out of 11955 0.02%	1	all-7753
Molecular Function: N-(5-amino-5-carboxypentanoyl)-L-cysteinyl-D-valine synthase activity view genes	1 out of 1967 0.05%	2 out of 11955 0.02%	1	all-4574
Molecular Function: RNA polymerase II core promoter sequence-specific DNA binding transcription factor activity view genes	1 out of 1967 0.05%	2 out of 11955 0.02%	1	n-21997
Molecular Function: histone demethylase activity (H3-K27 specific) view genes	1 out of 1967 0.05%	2 out of 11955 0.02%	1	n-47753
Molecular Function: lipid phosphatase activity view genes	1 out of 1967 0.05%	2 out of 11955 0.02%	1	all-3392
Molecular Function: serine-type carboxypeptidase activity view genes	1 out of 1967 0.05%	2 out of 11955 0.02%	1	all-56309
Molecular Function: olfactory receptor activity view genes	1 out of 1967 0.05%	2 out of 11955 0.02%	1	n-1685
Molecular Function: uridylate kinase activity view genes	1 out of 1967 0.05%	2 out of 11955 0.02%	1	all-38424
Molecular Function: nucleotide phosphatase activity view genes	1 out of 1967 0.05%	2 out of 11955 0.02%	1	all-3392
Molecular Function: voltage-gated anion channel activity view genes	1 out of 1967 0.05%	2 out of 11955 0.02%	1	s-26071
Molecular Function: heparan sulfate proteoglycan binding view genes	1 out of 1967 0.05%	2 out of 11955 0.02%	1	all-71254
Molecular Function: racemase and epimerase activity, acting on carbohydrates and derivatives view genes	1 out of 1967 0.05%	2 out of 11955 0.02%	1	n-3771
Molecular Function: fructokinase activity view genes	1 out of 1967 0.05%	2 out of 11955 0.02%	1	s-11711
Molecular Function: glucosamine-6-phosphate deaminase activity view genes	1 out of 1967 0.05%	2 out of 11955 0.02%	1	all-70183
Molecular Function: calcium-dependent phospholipid binding view genes	1 out of 1967 0.05%	2 out of 11955 0.02%	1	n-54647
Molecular Function: monosaccharide binding view genes	1 out of 1967 0.05%	2 out of 11955 0.02%	1	n-21162
Molecular Function: 1-pyrroline-5-carboxylate dehydrogenase activity view genes	1 out of 1967 0.05%	2 out of 11955 0.02%	1	n-63437
Molecular Function: thyroxine 5'-deiodinase activity view genes	1 out of 1967 0.05%	2 out of 11955 0.02%	1	n-65065
Molecular Function: triose-phosphate isomerase activity view genes	1 out of 1967 0.05%	2 out of 11955 0.02%	1	n-3068
Molecular Function: JUN kinase kinase kinase kinase activity view genes	1 out of 1967 0.05%	2 out of 11955 0.02%	1	n-41116
Molecular Function: adenylylsulfate kinase activity view genes	1 out of 1967 0.05%	2 out of 11955 0.02%	1	all-1183
Molecular Function: cystathionine gamma-lyase activity view genes	1 out of 1967 0.05%	2 out of 11955 0.02%	1	n-28498
Molecular Function: lactoylglutathione lyase activity view genes	1 out of 1967 0.05%	2 out of 11955 0.02%	1	n-63256
Molecular Function: sepiapterin reductase activity view genes	1 out of 1967 0.05%	2 out of 11955 0.02%	1	all-48671
Molecular Function: phosphoglycerate mutase activity view genes	1 out of 1967 0.05%	2 out of 11955 0.02%	1	n-7095
Molecular Function: epidermal growth factor receptor binding view genes	1 out of 1967 0.05%	2 out of 11955 0.02%	1	all-2145
Molecular Function: SET domain binding view genes	1 out of 1967 0.05%	2 out of 11955 0.02%	1	n-251
Molecular Function: RNA polymerase II repressing transcription factor binding view genes	1 out of 1967 0.05%	2 out of 11955 0.02%	1	n-21997
Molecular Function: benzodiazepine receptor activity view genes	1 out of 1967 0.05%	2 out of 11955 0.02%	1	n-8696
Molecular Function: extracellular matrix structural constituent conferring tensile strength view genes	4 out of 1967 0.20%	17 out of 11955 0.14%	1	all-67241, n-12631, s-16311, all-154
Molecular Function: neurotransmitter transporter activity view genes	6 out of 1967 0.31%	28 out of 11955 0.23%	1	n-39115, n-2829, all-55589, n-698, all-5220, all-60334
Molecular Function: peptidase activity view genes	29 out of 1967 1.47%	160 out of 11955 1.34%	1	s-32000, all-19506, all-11005, all-8246, s-9877, all-70415, n-37054, all-29671, n-1429, all-11796, n-12152, all-30773, n-12907, n-2823, n-3811, n-11482, all-5823, n-33983, n-32433, n-64845, n-27298, all-52412, all-35029, n-54355, all-16391, s-27176, n-19260, s-19394, n-28424
Molecular Function: phosphatidylinositol-4,5-bisphosphate binding view genes	3 out of 1967 0.15%	12 out of 11955 0.10%	1	all-5206, s-15029, n-30036
Molecular Function: damaged DNA binding view genes	3 out of 1967 0.15%	12 out of 11955 0.10%	1	all-7096, n-17867, n-91
Molecular Function: protein phosphatase type 2A regulator activity view genes	2 out of 1967 0.10%	7 out of 11955 0.06%	1	n-7298, n-22616
Molecular Function: tropomyosin binding view genes	2 out of 1967 0.10%	7 out of 11955 0.06%	1	s-20087, all-1333
Molecular Function: disulfide oxidoreductase activity view genes	2 out of 1967 0.10%	7 out of 11955 0.06%	1	s-125, n-20663
Molecular Function: glycerol kinase activity view genes	2 out of 1967 0.10%	7 out of 11955 0.06%	1	n-5164, n-13773
Molecular Function: metallocarboxypeptidase activity view genes	2 out of 1967 0.10%	7 out of 11955 0.06%	1	n-61626, all-56309
Molecular Function: potassium channel inhibitor activity view genes	2 out of 1967 0.10%	7 out of 11955 0.06%	1	all-25588, all-70536
Molecular Function: heparin binding view genes	2 out of 1967 0.10%	7 out of 11955 0.06%	1	all-10057, all-71254
Molecular Function: ATP-dependent peptidase activity view genes	2 out of 1967 0.10%	7 out of 11955 0.06%	1	n-64651, all-37842
Molecular Function: RNA cap binding view genes	2 out of 1967 0.10%	7 out of 11955 0.06%	1	s-36122, n-27155
Molecular Function: nicotinate-nucleotide diphosphorylase (carboxylating) activity view genes	2 out of 1967 0.10%	7 out of 11955 0.06%	1	n-14347, n-53207
Molecular Function: calmodulin-dependent protein kinase activity view genes	11 out of 1967 0.56%	57 out of 11955 0.48%	1	n-63007, n-12525, n-63292, all-6262, all-16043, n-37457, all-11554, s-34185, all-49335, n-54102, s-22282
Molecular Function: cofactor binding view genes	4 out of 1967 0.20%	18 out of 11955 0.15%	1	all-61480, all-39885, all-1279, n-63948
Molecular Function: DNA-directed RNA polymerase activity view genes	10 out of 1967 0.51%	52 out of 11955 0.43%	1	s-52454, all-67493, s-54322, all-35349, n-26999, n-53492, s-52229, all-9449, all-58395, n-19118
Molecular Function: oxidoreductase activity, acting on the aldehyde or oxo group of donors, NAD or NADP as acceptor view genes	7 out of 1967 0.36%	35 out of 11955 0.29%	1	all-66257, all-1339, s-23913, n-34403, all-3180, all-2147, n-63437
Molecular Function: cysteine-type endopeptidase activity view genes	7 out of 1967 0.36%	35 out of 11955 0.29%	1	n-62861, n-33983, n-32433, n-6801, all-6235, n-17688, all-71051
Molecular Function: bHLH transcription factor binding view genes	12 out of 1967 0.61%	64 out of 11955 0.54%	1	n-6853, s-23397, n-19317, all-9593, n-6618, n-23546, s-22035, all-57094, n-18126, all-31407, n-19422, all-45922
Molecular Function: cyclin-dependent protein serine/threonine kinase regulator activity view genes	3 out of 1967 0.15%	13 out of 11955 0.11%	1	n-35001, n-31680, n-63288
Molecular Function: cytoskeletal protein binding view genes	14 out of 1967 0.71%	76 out of 11955 0.64%	1	s-42639, n-61124, all-6760, all-71848, n-24045, n-1999, all-16468, all-5229, s-10364, n-7469, n-62800, all-57628, n-33643, all-7482
Molecular Function: protein domain specific binding view genes	10 out of 1967 0.51%	53 out of 11955 0.44%	1	all-24551, s-54724, s-11194, all-7991, all-40866, s-573, n-46607, n-20537, all-70763, n-63907
Molecular Function: receptor activity view genes	11 out of 1967 0.56%	59 out of 11955 0.49%	1	n-32044, all-63888, all-4989, s-6580, all-62331, all-24154, all-35591, all-61248, all-67190, all-1880, s-51553
Molecular Function: serotonin transmembrane transporter activity view genes	12 out of 1967 0.61%	65 out of 11955 0.54%	1	all-1721, all-5220, n-30100, n-2447, n-59916, n-39115, n-2829, n-698, all-60334, s-38557, all-55589, s-27996
Molecular Function: flavin adenine dinucleotide binding view genes	14 out of 1967 0.71%	77 out of 11955 0.64%	1	n-20663, n-40193, n-51778, all-2634, s-8861, all-15222, all-51772, n-36512, n-6775, n-63596, n-313, s-4107, all-61842, all-18043
Molecular Function: cGMP-dependent protein kinase activity view genes	2 out of 1967 0.10%	8 out of 11955 0.07%	1	s-28159, all-2223
Molecular Function: U5 snRNA binding view genes	2 out of 1967 0.10%	8 out of 11955 0.07%	1	s-29906, n-15985
Molecular Function: NEDD8 activating enzyme activity view genes	2 out of 1967 0.10%	8 out of 11955 0.07%	1	n-29548, all-65441
Molecular Function: U6 snRNA binding view genes	2 out of 1967 0.10%	8 out of 11955 0.07%	1	s-29906, n-15985
Molecular Function: structural constituent of cuticle view genes	2 out of 1967 0.10%	8 out of 11955 0.07%	1	all-57745, all-7003
Molecular Function: protein-glutamine gamma-glutamyltransferase activity view genes	2 out of 1967 0.10%	8 out of 11955 0.07%	1	n-39577, n-2080
Molecular Function: diacylglycerol kinase activity view genes	2 out of 1967 0.10%	8 out of 11955 0.07%	1	n-5164, n-13773
Molecular Function: corazonin receptor binding view genes	2 out of 1967 0.10%	8 out of 11955 0.07%	1	all-71848, all-25771
Molecular Function: succinate-CoA ligase (ADP-forming) activity view genes	2 out of 1967 0.10%	8 out of 11955 0.07%	1	n-41148, all-1279
Molecular Function: histone deacetylase activity view genes	2 out of 1967 0.10%	8 out of 11955 0.07%	1	s-21123, s-3732
Molecular Function: serine-type endopeptidase activity view genes	9 out of 1967 0.46%	48 out of 11955 0.40%	1	n-64651, n-63944, n-41609, n-45807, n-636, n-20476, all-24156, all-37842, s-52379
Molecular Function: non-membrane spanning protein tyrosine kinase activity view genes	5 out of 1967 0.25%	25 out of 11955 0.21%	1	n-1800, all-64460, n-65034, s-13486, s-3898
Molecular Function: oxidoreductase activity, acting on the CH-OH group of donors, NAD or NADP as acceptor view genes	10 out of 1967 0.51%	54 out of 11955 0.45%	1	n-41720, all-3124, n-7489, all-258, n-20654, all-32524, all-39885, n-1221, all-69683, n-521
Molecular Function: metallopeptidase activity view genes	7 out of 1967 0.36%	37 out of 11955 0.31%	1	n-22050, all-55425, s-1550, n-54000, all-17481, n-62266, n-47501
Molecular Function: single-stranded DNA binding view genes	3 out of 1967 0.15%	14 out of 11955 0.12%	1	all-37842, all-402, s-51069
Molecular Function: RNA polymerase II carboxy-terminal domain kinase activity view genes	3 out of 1967 0.15%	14 out of 11955 0.12%	1	all-70479, n-8006, all-61878
Molecular Function: solute:hydrogen antiporter activity view genes	1 out of 1967 0.05%	3 out of 11955 0.03%	1	all-64993
Molecular Function: L-iditol 2-dehydrogenase activity view genes	1 out of 1967 0.05%	3 out of 11955 0.03%	1	n-1221
Molecular Function: chloride transmembrane transporter activity view genes	1 out of 1967 0.05%	3 out of 11955 0.03%	1	all-13517
Molecular Function: dipeptidase activity view genes	1 out of 1967 0.05%	3 out of 11955 0.03%	1	all-17481
Molecular Function: histidine-tRNA ligase activity view genes	1 out of 1967 0.05%	3 out of 11955 0.03%	1	n-26219
Molecular Function: hydrolase activity, acting on carbon-nitrogen (but not peptide) bonds, in linear amidines view genes	1 out of 1967 0.05%	3 out of 11955 0.03%	1	s-6162
Molecular Function: ubiquinol-cytochrome-c reductase activity view genes	1 out of 1967 0.05%	3 out of 11955 0.03%	1	n-63839
Molecular Function: L-malate dehydrogenase activity view genes	1 out of 1967 0.05%	3 out of 11955 0.03%	1	n-65331
Molecular Function: NAD(P)H oxidase activity view genes	1 out of 1967 0.05%	3 out of 11955 0.03%	1	all-20302
Molecular Function: S-adenosylmethionine-dependent methyltransferase activity view genes	1 out of 1967 0.05%	3 out of 11955 0.03%	1	all-1187
Molecular Function: small protein activating enzyme activity view genes	1 out of 1967 0.05%	3 out of 11955 0.03%	1	s-12926
Molecular Function: dihydrolipoyl dehydrogenase activity view genes	1 out of 1967 0.05%	3 out of 11955 0.03%	1	n-36512
Molecular Function: guanylate kinase activity view genes	1 out of 1967 0.05%	3 out of 11955 0.03%	1	all-2145
Molecular Function: protein binding, bridging view genes	1 out of 1967 0.05%	3 out of 11955 0.03%	1	all-8572
Molecular Function: GDP-4-dehydro-D-rhamnose reductase activity view genes	1 out of 1967 0.05%	3 out of 11955 0.03%	1	n-249
Molecular Function: inositol oxygenase activity view genes	1 out of 1967 0.05%	3 out of 11955 0.03%	1	n-210
Molecular Function: histone-arginine N-methyltransferase activity view genes	1 out of 1967 0.05%	3 out of 11955 0.03%	1	n-63287
Molecular Function: oxidized purine nucleobase lesion DNA N-glycosylase activity view genes	1 out of 1967 0.05%	3 out of 11955 0.03%	1	all-71211
Molecular Function: organic phosphonate transmembrane-transporting ATPase activity view genes	1 out of 1967 0.05%	3 out of 11955 0.03%	1	n-7766
Molecular Function: mitochondrial light strand promoter anti-sense binding view genes	1 out of 1967 0.05%	3 out of 11955 0.03%	1	all-37842
Molecular Function: chromatin DNA binding view genes	1 out of 1967 0.05%	3 out of 11955 0.03%	1	n-18294
Molecular Function: lamin binding view genes	1 out of 1967 0.05%	3 out of 11955 0.03%	1	n-18294
Molecular Function: DNA ligase activity view genes	1 out of 1967 0.05%	3 out of 11955 0.03%	1	all-63128
Molecular Function: hydrolase activity, hydrolyzing N-glycosyl compounds view genes	1 out of 1967 0.05%	3 out of 11955 0.03%	1	n-6037
Molecular Function: protein-cysteine S-palmitoyltransferase activity view genes	1 out of 1967 0.05%	3 out of 11955 0.03%	1	s-172
Molecular Function: protein-N(PI)-phosphohistidine-sugar phosphotransferase activity view genes	1 out of 1967 0.05%	3 out of 11955 0.03%	1	n-11279
Molecular Function: microfilament motor activity view genes	1 out of 1967 0.05%	3 out of 11955 0.03%	1	all-36507
Molecular Function: triglyceride lipase activity view genes	1 out of 1967 0.05%	3 out of 11955 0.03%	1	all-16789
Molecular Function: regulatory region DNA binding view genes	1 out of 1967 0.05%	3 out of 11955 0.03%	1	n-2035
Molecular Function: N6-(1,2-dicarboxyethyl)AMP AMP-lyase (fumarate-forming) activity view genes	1 out of 1967 0.05%	3 out of 11955 0.03%	1	s-6643
Molecular Function: carbon-nitrogen ligase activity, with glutamine as amido-N-donor view genes	1 out of 1967 0.05%	3 out of 11955 0.03%	1	n-64692
Molecular Function: 3-oxoacid CoA-transferase activity view genes	1 out of 1967 0.05%	3 out of 11955 0.03%	1	all-16855
Molecular Function: methylenetetrahydrofolate dehydrogenase (NADP+) activity view genes	1 out of 1967 0.05%	3 out of 11955 0.03%	1	all-68864
Molecular Function: (S)-2-(5-amino-1-(5-phospho-D-ribosyl)imidazole-4-carboxamido)succinate AMP-lyase (fumarate-forming) activity view genes	1 out of 1967 0.05%	3 out of 11955 0.03%	1	s-6643
Molecular Function: sodium:potassium-exchanging ATPase activity view genes	1 out of 1967 0.05%	3 out of 11955 0.03%	1	n-11126
Molecular Function: calcium-dependent protein serine/threonine phosphatase activity view genes	1 out of 1967 0.05%	3 out of 11955 0.03%	1	all-7753
Molecular Function: inorganic cation transmembrane transporter activity view genes	1 out of 1967 0.05%	3 out of 11955 0.03%	1	s-53686
Molecular Function: histone demethylase activity (H3-K36 specific) view genes	1 out of 1967 0.05%	3 out of 11955 0.03%	1	all-27738
Molecular Function: 3-hydroxyacyl-CoA dehydrogenase activity view genes	1 out of 1967 0.05%	3 out of 11955 0.03%	1	n-41720
Molecular Function: acetate-CoA ligase activity view genes	1 out of 1967 0.05%	3 out of 11955 0.03%	1	n-54062
Molecular Function: secondary active sulfate transmembrane transporter activity view genes	1 out of 1967 0.05%	3 out of 11955 0.03%	1	all-22096
Molecular Function: ornithine-oxo-acid transaminase activity view genes	1 out of 1967 0.05%	3 out of 11955 0.03%	1	n-10253
Molecular Function: phosphatidylinositol phosphate binding view genes	1 out of 1967 0.05%	3 out of 11955 0.03%	1	n-5000
Molecular Function: amidine-lyase activity view genes	1 out of 1967 0.05%	3 out of 11955 0.03%	1	n-20869
Molecular Function: ligand-gated ion channel activity view genes	1 out of 1967 0.05%	3 out of 11955 0.03%	1	n-65288
Molecular Function: RNA polymerase II core promoter proximal region sequence-specific DNA binding transcription factor activity view genes	1 out of 1967 0.05%	3 out of 11955 0.03%	1	n-64210
Molecular Function: nucleoside diphosphate kinase activity view genes	1 out of 1967 0.05%	3 out of 11955 0.03%	1	n-12253
Molecular Function: store-operated calcium channel activity view genes	1 out of 1967 0.05%	3 out of 11955 0.03%	1	n-20251
Molecular Function: ribonucleoside binding view genes	4 out of 1967 0.20%	20 out of 11955 0.17%	1	all-58395, all-67493, n-26999, n-53492
Molecular Function: peroxidase activity view genes	5 out of 1967 0.25%	26 out of 11955 0.22%	1	all-27502, n-7650, s-32443, n-1822, n-18017
Molecular Function: helicase activity view genes	21 out of 1967 1.07%	121 out of 11955 1.01%	1	all-16812, n-14956, all-20476, all-71047, n-68, n-32631, all-37727, all-16839, all-5871, s-4602, all-11987, n-3028, all-57115, n-8049, n-19911, n-62944, s-19388, all-61800, all-443, n-62798, all-52321
Molecular Function: translation elongation factor activity view genes	6 out of 1967 0.31%	32 out of 11955 0.27%	1	n-63067, n-48410, s-32356, s-44925, all-16793, all-4165
Molecular Function: protein dimerization activity view genes	7 out of 1967 0.36%	38 out of 11955 0.32%	1	n-26165, s-33871, n-64210, all-14122, all-64460, all-2869, s-1451
Molecular Function: aminoacyl-tRNA ligase activity view genes	8 out of 1967 0.41%	44 out of 11955 0.37%	1	all-4417, s-52223, s-39216, n-52646, all-46201, all-1340, n-48297, n-43224
Molecular Function: motor activity view genes	15 out of 1967 0.76%	86 out of 11955 0.72%	1	all-7599, all-66020, n-24045, n-48687, n-26162, n-28754, n-35466, all-36124, s-54321, s-11917, all-5965, n-40321, all-22730, n-60815, s-52742
Molecular Function: Y-form DNA binding view genes	2 out of 1967 0.10%	9 out of 11955 0.08%	1	all-67603, all-35938
Molecular Function: DNA-(apurinic or apyrimidinic site) lyase activity view genes	2 out of 1967 0.10%	9 out of 11955 0.08%	1	n-7585, all-31082
Molecular Function: ecdysteroid 25-hydroxylase activity view genes	2 out of 1967 0.10%	9 out of 11955 0.08%	1	n-20246, n-3004
Molecular Function: potassium channel activity view genes	2 out of 1967 0.10%	9 out of 11955 0.08%	1	all-2866, all-1148
Molecular Function: protein disulfide isomerase activity view genes	2 out of 1967 0.10%	9 out of 11955 0.08%	1	n-39577, n-2080
Molecular Function: prothoracicotrophic hormone activity view genes	2 out of 1967 0.10%	9 out of 11955 0.08%	1	n-20246, n-3004
Molecular Function: DEAD/H-box RNA helicase binding view genes	2 out of 1967 0.10%	9 out of 11955 0.08%	1	all-65441, n-4012
Molecular Function: choline dehydrogenase activity view genes	2 out of 1967 0.10%	9 out of 11955 0.08%	1	n-313, all-15222
Molecular Function: ferroxidase activity view genes	2 out of 1967 0.10%	9 out of 11955 0.08%	1	n-9676, s-48293
Molecular Function: DNA binding, bending view genes	3 out of 1967 0.15%	15 out of 11955 0.13%	1	n-56980, all-3847, n-14277
Molecular Function: histone acetyltransferase activity view genes	11 out of 1967 0.56%	63 out of 11955 0.53%	1	n-3855, all-3658, n-59626, n-10830, s-52229, n-1943, n-44572, n-40204, n-36041, all-14321, n-63933
Molecular Function: protein kinase binding view genes	10 out of 1967 0.51%	58 out of 11955 0.49%	1	s-22692, n-41609, all-9911, n-31680, n-45807, all-44358, all-3847, n-636, n-7469, n-20644
Molecular Function: mRNA 3'-UTR binding view genes	8 out of 1967 0.41%	46 out of 11955 0.38%	1	all-3847, n-19317, n-58032, n-47374, n-18788, all-17023, n-1104, n-63788
Molecular Function: signaling receptor activity view genes	7 out of 1967 0.36%	40 out of 11955 0.33%	1	n-52848, all-24551, n-2829, all-1721, all-17974, n-64210, n-5430
Molecular Function: transaminase activity view genes	4 out of 1967 0.20%	22 out of 11955 0.18%	1	n-63129, all-27001, all-6140, n-28498
Molecular Function: 3'-5' DNA helicase activity view genes	4 out of 1967 0.20%	22 out of 11955 0.18%	1	s-5140, n-63915, all-3847, n-3687
Molecular Function: cyclin-dependent protein serine/threonine kinase activity view genes	3 out of 1967 0.15%	16 out of 11955 0.13%	1	s-35034, all-70479, n-31680
Molecular Function: propionyl-CoA carboxylase activity view genes	2 out of 1967 0.10%	10 out of 11955 0.08%	1	all-7016, all-40325
Molecular Function: myosin phosphatase activity view genes	2 out of 1967 0.10%	10 out of 11955 0.08%	1	s-52018, s-12134
Molecular Function: hydrolase activity, acting on acid anhydrides, catalyzing transmembrane movement of substances view genes	2 out of 1967 0.10%	10 out of 11955 0.08%	1	n-140, n-3378
Molecular Function: chloride channel activity view genes	2 out of 1967 0.10%	10 out of 11955 0.08%	1	all-53429, s-9399
Molecular Function: nucleic acid binding view genes	102 out of 1967 5.19%	619 out of 11955 5.18%	1	s-37136, all-2751, n-34739, all-60701, n-15728, s-54908, all-15401, n-32785, n-3028, all-57115, n-1183, n-7672, all-71047, n-63371, all-9016, n-23445, all-36135, all-18634, n-17218, n-10101, n-4782, n-46420, n-63424, n-3128, all-31407, n-62798, all-7652, all-20476, s-53844, all-11327, s-9931, n-10587, n-42508, all-1454, n-55825, n-44, all-35938, n-15985, n-4351, all-5609, all-46201, n-19317, n-64…
Molecular Function: palmitoyl-(protein) hydrolase activity view genes	1 out of 1967 0.05%	4 out of 11955 0.03%	1	all-22846
Molecular Function: hydrolase activity, acting on carbon-nitrogen (but not peptide) bonds, in cyclic amides view genes	1 out of 1967 0.05%	4 out of 11955 0.03%	1	all-70375
Molecular Function: proton-transporting ATP synthase activity, rotational mechanism view genes	1 out of 1967 0.05%	4 out of 11955 0.03%	1	s-14498
Molecular Function: uridine kinase activity view genes	1 out of 1967 0.05%	4 out of 11955 0.03%	1	all-38424
Molecular Function: NEDD8 ligase activity view genes	1 out of 1967 0.05%	4 out of 11955 0.03%	1	n-31669
Molecular Function: microtubule plus-end binding view genes	1 out of 1967 0.05%	4 out of 11955 0.03%	1	n-8396
Molecular Function: methylated-DNA-[protein]-cysteine S-methyltransferase activity view genes	1 out of 1967 0.05%	4 out of 11955 0.03%	1	all-44286
Molecular Function: GDP-L-fucose synthase activity view genes	1 out of 1967 0.05%	4 out of 11955 0.03%	1	n-249
Molecular Function: methylcrotonoyl-CoA carboxylase activity view genes	1 out of 1967 0.05%	4 out of 11955 0.03%	1	all-7016
Molecular Function: glycogen phosphorylase activity view genes	1 out of 1967 0.05%	4 out of 11955 0.03%	1	n-16405
Molecular Function: four-way junction DNA binding view genes	1 out of 1967 0.05%	4 out of 11955 0.03%	1	s-51059
Molecular Function: rDNA binding view genes	1 out of 1967 0.05%	4 out of 11955 0.03%	1	s-51059
Molecular Function: lysophospholipase activity view genes	1 out of 1967 0.05%	4 out of 11955 0.03%	1	n-51632
Molecular Function: ribonucleotide binding view genes	1 out of 1967 0.05%	4 out of 11955 0.03%	1	n-18039
Molecular Function: sterol binding view genes	1 out of 1967 0.05%	4 out of 11955 0.03%	1	all-7298
Molecular Function: satellite DNA binding view genes	1 out of 1967 0.05%	4 out of 11955 0.03%	1	s-51059
Molecular Function: alkaline phosphatase activity view genes	1 out of 1967 0.05%	4 out of 11955 0.03%	1	n-43603
Molecular Function: argininosuccinate synthase activity view genes	1 out of 1967 0.05%	4 out of 11955 0.03%	1	all-12156
Molecular Function: pre-mRNA intronic binding view genes	1 out of 1967 0.05%	4 out of 11955 0.03%	1	n-68
Molecular Function: voltage-gated ion channel activity view genes	1 out of 1967 0.05%	4 out of 11955 0.03%	1	all-2866
Molecular Function: AT DNA binding view genes	1 out of 1967 0.05%	4 out of 11955 0.03%	1	n-56980
Molecular Function: phospholipid-hydroperoxide glutathione peroxidase activity view genes	1 out of 1967 0.05%	4 out of 11955 0.03%	1	s-32443
Molecular Function: GDP binding view genes	1 out of 1967 0.05%	4 out of 11955 0.03%	1	n-47331
Molecular Function: D-aspartate oxidase activity view genes	1 out of 1967 0.05%	4 out of 11955 0.03%	1	n-63948
Molecular Function: JUN kinase kinase kinase activity view genes	1 out of 1967 0.05%	4 out of 11955 0.03%	1	all-59180
Molecular Function: histone methyltransferase activity (H3-K27 specific) view genes	1 out of 1967 0.05%	4 out of 11955 0.03%	1	n-40204
Molecular Function: phospho-N-acetylmuramoyl-pentapeptide-transferase activity view genes	1 out of 1967 0.05%	4 out of 11955 0.03%	1	n-40301
Molecular Function: branched-chain-amino-acid transaminase activity view genes	1 out of 1967 0.05%	4 out of 11955 0.03%	1	n-4135
Molecular Function: endopeptidase inhibitor activity view genes	1 out of 1967 0.05%	4 out of 11955 0.03%	1	all-6992
Molecular Function: symporter activity view genes	8 out of 1967 0.41%	48 out of 11955 0.40%	1	n-39115, all-5220, all-60334, n-30100, n-2447, s-38557, all-55589, n-59916
Molecular Function: peptidase inhibitor activity view genes	3 out of 1967 0.15%	17 out of 11955 0.14%	1	n-10338, all-9669, all-56392
Molecular Function: histone methyltransferase activity view genes	3 out of 1967 0.15%	17 out of 11955 0.14%	1	n-2659, n-63287, all-13991
Molecular Function: receptor signaling protein serine/threonine kinase activity view genes	3 out of 1967 0.15%	17 out of 11955 0.14%	1	s-20280, all-7991, all-29640
Molecular Function: actin-dependent ATPase activity view genes	7 out of 1967 0.36%	42 out of 11955 0.35%	1	all-66020, all-36507, all-3847, s-11917, all-22730, n-60815, all-6644
Molecular Function: kinase activity view genes	39 out of 1967 1.98%	239 out of 11955 2.00%	1	n-33977, n-65318, n-49339, s-33871, n-31680, n-40541, all-38286, s-50594, n-8455, n-53144, n-18646, s-5407, n-755, all-711, n-33760, all-12828, s-52962, all-7516, n-28516, n-24289, s-53378, all-17088, n-9166, all-42425, s-5608, s-21459, all-11987, s-31570, n-19342, all-39493, n-42871, all-70235, n-17688, all-39626, all-27072, all-8442, n-20537, all-30965, all-5289
Molecular Function: ATP-dependent 3'-5' DNA helicase activity view genes	2 out of 1967 0.10%	11 out of 11955 0.09%	1	all-67603, all-35938
Molecular Function: MAP kinase kinase kinase activity view genes	2 out of 1967 0.10%	11 out of 11955 0.09%	1	n-65034, all-59180
Molecular Function: protein tyrosine/serine/threonine phosphatase activity view genes	2 out of 1967 0.10%	11 out of 11955 0.09%	1	n-31597, n-35548
Molecular Function: calcium-transporting ATPase activity view genes	2 out of 1967 0.10%	11 out of 11955 0.09%	1	s-8733, all-50790
Molecular Function: ATP-dependent DNA helicase activity view genes	5 out of 1967 0.25%	30 out of 11955 0.25%	1	n-47546, all-57115, all-8048, all-61800, n-7672
Molecular Function: nucleosome-dependent ATPase activity view genes	4 out of 1967 0.20%	24 out of 11955 0.20%	1	n-36316, all-57115, all-54279, n-7672
Molecular Function: osmosensor activity view genes	10 out of 1967 0.51%	62 out of 11955 0.52%	1	n-39115, n-698, all-5220, all-60334, n-30100, n-2447, s-38557, all-55589, n-59916, s-27996
Molecular Function: cadherin binding view genes	1 out of 1967 0.05%	5 out of 11955 0.04%	1	n-7469
Molecular Function: protein-hormone receptor activity view genes	1 out of 1967 0.05%	5 out of 11955 0.04%	1	n-18515
Molecular Function: beta-galactosidase activity view genes	1 out of 1967 0.05%	5 out of 11955 0.04%	1	all-7421
Molecular Function: poly(A)-specific ribonuclease activity view genes	1 out of 1967 0.05%	5 out of 11955 0.04%	1	n-40204
Molecular Function: deoxyribodipyrimidine photo-lyase activity view genes	1 out of 1967 0.05%	5 out of 11955 0.04%	1	n-40193
Molecular Function: glutamate-ammonia ligase activity view genes	1 out of 1967 0.05%	5 out of 11955 0.04%	1	s-54899
Molecular Function: lipid transporter activity view genes	1 out of 1967 0.05%	5 out of 11955 0.04%	1	n-260
Molecular Function: 3'-5' exonuclease activity view genes	1 out of 1967 0.05%	5 out of 11955 0.04%	1	all-70977
Molecular Function: transferase activity, transferring acyl groups, acyl groups converted into alkyl on transfer view genes	1 out of 1967 0.05%	5 out of 11955 0.04%	1	all-1279
Molecular Function: 3',5'-cyclic-GMP phosphodiesterase activity view genes	1 out of 1967 0.05%	5 out of 11955 0.04%	1	s-17551
Molecular Function: sugar transmembrane transporter activity view genes	1 out of 1967 0.05%	5 out of 11955 0.04%	1	all-5755
Molecular Function: CTP synthase activity view genes	1 out of 1967 0.05%	5 out of 11955 0.04%	1	n-3687
Molecular Function: manganese ion binding view genes	1 out of 1967 0.05%	5 out of 11955 0.04%	1	all-71314
Molecular Function: gap junction channel activity view genes	1 out of 1967 0.05%	5 out of 11955 0.04%	1	s-48836
Molecular Function: fructose-bisphosphate aldolase activity view genes	1 out of 1967 0.05%	5 out of 11955 0.04%	1	all-39198
Molecular Function: sulfate adenylyltransferase (ATP) activity view genes	1 out of 1967 0.05%	5 out of 11955 0.04%	1	all-1183
Molecular Function: UDP-glucose:glycoprotein glucosyltransferase activity view genes	1 out of 1967 0.05%	5 out of 11955 0.04%	1	n-833
Molecular Function: receptor signaling complex scaffold activity view genes	1 out of 1967 0.05%	5 out of 11955 0.04%	1	all-29418
Molecular Function: N-methyl-D-aspartate selective glutamate receptor activity view genes	1 out of 1967 0.05%	5 out of 11955 0.04%	1	n-34155
Molecular Function: DNA ligase (ATP) activity view genes	1 out of 1967 0.05%	5 out of 11955 0.04%	1	n-62860
Molecular Function: 7S RNA binding view genes	1 out of 1967 0.05%	5 out of 11955 0.04%	1	n-26747
Molecular Function: fatty acid binding view genes	1 out of 1967 0.05%	5 out of 11955 0.04%	1	s-25342
Molecular Function: thymidine kinase activity view genes	1 out of 1967 0.05%	5 out of 11955 0.04%	1	n-8356
Molecular Function: ligase activity view genes	24 out of 1967 1.22%	150 out of 11955 1.25%	1	n-13044, all-36921, s-11194, n-43224, all-51356, all-61480, n-25458, n-3771, n-329, all-9311, all-5980, s-3449, n-31239, all-25821, n-54062, n-9166, all-25854, all-12156, n-7270, s-12926, s-11524, n-61626, n-586, all-26948
Molecular Function: Rab GTPase activator activity view genes	4 out of 1967 0.20%	25 out of 11955 0.21%	1	all-23947, n-35328, all-44016, all-65326
Molecular Function: metalloendopeptidase activity view genes	4 out of 1967 0.20%	25 out of 11955 0.21%	1	n-64869, all-55425, n-63839, n-20454
Molecular Function: acetylcholine transmembrane transporter activity view genes	9 out of 1967 0.46%	57 out of 11955 0.48%	1	s-24471, all-1721, all-56703, n-30100, n-2447, s-38557, n-36615, n-59916, s-27996
Molecular Function: hydrolase activity, acting on carbon-nitrogen (but not peptide) bonds, in linear amides view genes	2 out of 1967 0.10%	12 out of 11955 0.10%	1	n-16076, n-6050
Molecular Function: tau-protein kinase activity view genes	2 out of 1967 0.10%	12 out of 11955 0.10%	1	s-52962, all-27072
Molecular Function: octopamine receptor activity view genes	2 out of 1967 0.10%	12 out of 11955 0.10%	1	all-69931, all-4586
Molecular Function: core promoter binding view genes	2 out of 1967 0.10%	12 out of 11955 0.10%	1	n-20246, n-3004
Molecular Function: coenzyme binding view genes	10 out of 1967 0.51%	64 out of 11955 0.54%	1	s-6250, n-41720, n-63930, all-29299, n-7691, n-249, all-2147, n-6775, s-27933, n-18039
Molecular Function: acyl-CoA dehydrogenase activity view genes	3 out of 1967 0.15%	19 out of 11955 0.16%	1	s-8861, n-51778, all-51772
Molecular Function: transferase activity, transferring acyl groups view genes	7 out of 1967 0.36%	45 out of 11955 0.38%	1	all-61480, all-15826, all-14789, n-47420, all-71222, n-8362, n-14589
Molecular Function: transmembrane receptor protein tyrosine kinase activity view genes	6 out of 1967 0.31%	39 out of 11955 0.33%	1	all-69496, n-1800, n-20476, n-28702, all-40866, all-55952
Molecular Function: lyase activity view genes	7 out of 1967 0.36%	46 out of 11955 0.38%	1	s-1365, n-41425, n-6187, s-6643, all-10618, n-58640, n-43930
Molecular Function: activating transcription factor binding view genes	2 out of 1967 0.10%	13 out of 11955 0.11%	1	s-35966, all-71373
Molecular Function: calcium-dependent protein serine/threonine kinase activity view genes	2 out of 1967 0.10%	13 out of 11955 0.11%	1	all-49335, all-11554
Molecular Function: aspartic-type endopeptidase activity view genes	2 out of 1967 0.10%	13 out of 11955 0.11%	1	s-9877, s-55092
Molecular Function: exopeptidase activity view genes	2 out of 1967 0.10%	13 out of 11955 0.11%	1	all-45919, s-36405
Molecular Function: scavenger receptor activity view genes	2 out of 1967 0.10%	13 out of 11955 0.11%	1	all-6160, n-63449
Molecular Function: ion channel binding view genes	2 out of 1967 0.10%	13 out of 11955 0.11%	1	all-49335, all-11554
Molecular Function: 2 iron, 2 sulfur cluster binding view genes	2 out of 1967 0.10%	13 out of 11955 0.11%	1	n-2255, n-5720
Molecular Function: Wnt-activated receptor activity view genes	1 out of 1967 0.05%	6 out of 11955 0.05%	1	n-41352
Molecular Function: tyramine receptor activity view genes	1 out of 1967 0.05%	6 out of 11955 0.05%	1	all-69931
Molecular Function: peptide-N4-(N-acetyl-beta-glucosaminyl)asparagine amidase activity view genes	1 out of 1967 0.05%	6 out of 11955 0.05%	1	s-53378
Molecular Function: Ran GTPase activator activity view genes	1 out of 1967 0.05%	6 out of 11955 0.05%	1	s-6767
Molecular Function: NAD-dependent histone deacetylase activity (H3-K9 specific) view genes	1 out of 1967 0.05%	6 out of 11955 0.05%	1	n-34626
Molecular Function: extracellular-glutamate-gated ion channel activity view genes	1 out of 1967 0.05%	6 out of 11955 0.05%	1	n-34155
Molecular Function: protein phosphatase 1 binding view genes	1 out of 1967 0.05%	6 out of 11955 0.05%	1	s-20273
Molecular Function: NAD-dependent histone deacetylase activity (H3-K18 specific) view genes	1 out of 1967 0.05%	6 out of 11955 0.05%	1	n-34626
Molecular Function: serotonin receptor activity view genes	1 out of 1967 0.05%	6 out of 11955 0.05%	1	all-4586
Molecular Function: oxidoreductase activity, acting on paired donors, with incorporation or reduction of molecular oxygen, NAD(P)H as one donor, and incorporation of one atom of oxygen view genes	1 out of 1967 0.05%	6 out of 11955 0.05%	1	s-27933
Molecular Function: acetylglucosaminyltransferase activity view genes	1 out of 1967 0.05%	6 out of 11955 0.05%	1	all-70534
Molecular Function: oxidoreductase activity, acting on single donors with incorporation of molecular oxygen, incorporation of two atoms of oxygen view genes	1 out of 1967 0.05%	6 out of 11955 0.05%	1	all-8402
Molecular Function: MAP kinase kinase activity view genes	1 out of 1967 0.05%	6 out of 11955 0.05%	1	all-6962
Molecular Function: oxygen sensor activity view genes	1 out of 1967 0.05%	6 out of 11955 0.05%	1	s-1365
Molecular Function: NAD-dependent histone deacetylase activity (H4-K16 specific) view genes	1 out of 1967 0.05%	6 out of 11955 0.05%	1	n-34626
Molecular Function: NAD+ synthase (glutamine-hydrolyzing) activity view genes	1 out of 1967 0.05%	6 out of 11955 0.05%	1	all-55562
Molecular Function: NADPH-hemoprotein reductase activity view genes	1 out of 1967 0.05%	6 out of 11955 0.05%	1	n-63930
Molecular Function: receptor signaling protein tyrosine kinase activity view genes	1 out of 1967 0.05%	6 out of 11955 0.05%	1	all-55952
Molecular Function: TFIID-class transcription factor binding view genes	1 out of 1967 0.05%	6 out of 11955 0.05%	1	all-3847
Molecular Function: alpha-L-fucosidase activity view genes	1 out of 1967 0.05%	6 out of 11955 0.05%	1	n-48010
Molecular Function: voltage-gated potassium channel activity view genes	1 out of 1967 0.05%	6 out of 11955 0.05%	1	s-1027
Molecular Function: UMP kinase activity view genes	1 out of 1967 0.05%	6 out of 11955 0.05%	1	all-38424
Molecular Function: TBP-class protein binding RNA polymerase II transcription factor activity involved in preinitiation complex assembly view genes	1 out of 1967 0.05%	6 out of 11955 0.05%	1	n-25620
Molecular Function: pre-miRNA binding view genes	1 out of 1967 0.05%	6 out of 11955 0.05%	1	all-9602
Molecular Function: C2H2 zinc finger domain binding view genes	1 out of 1967 0.05%	6 out of 11955 0.05%	1	all-3847
Molecular Function: protein-disulfide reductase activity view genes	1 out of 1967 0.05%	6 out of 11955 0.05%	1	s-53378
Molecular Function: NAD-dependent histone deacetylase activity (H3-K14 specific) view genes	1 out of 1967 0.05%	6 out of 11955 0.05%	1	n-34626
Molecular Function: GTPase regulator activity view genes	1 out of 1967 0.05%	6 out of 11955 0.05%	1	n-150
Molecular Function: iron-sulfur cluster binding view genes	8 out of 1967 0.41%	53 out of 11955 0.44%	1	n-7766, n-9530, n-6026, n-7691, n-19264, all-58647, n-1614, all-21292
Molecular Function: ligand-activated sequence-specific DNA binding RNA polymerase II transcription factor activity view genes	3 out of 1967 0.15%	20 out of 11955 0.17%	1	all-3135, s-35016, all-3847
Molecular Function: sphingomyelin phosphodiesterase activity view genes	4 out of 1967 0.20%	27 out of 11955 0.23%	1	all-58490, s-2190, all-14682, s-6767
Molecular Function: 2-alkenal reductase [NAD(P)] activity view genes	7 out of 1967 0.36%	47 out of 11955 0.39%	1	n-12525, n-46804, all-10618, all-23124, s-46538, n-58430, all-29418
Molecular Function: PDZ domain binding view genes	8 out of 1967 0.41%	54 out of 11955 0.45%	1	all-1721, n-8506, n-41352, n-30100, n-2447, s-38557, n-59916, s-27996
Molecular Function: myosin light chain binding view genes	6 out of 1967 0.31%	41 out of 11955 0.34%	1	all-66020, all-3847, s-11917, all-22730, n-60815, all-6644
Molecular Function: isomerase activity view genes	9 out of 1967 0.46%	61 out of 11955 0.51%	1	n-21162, s-6250, n-31176, n-14431, all-6890, s-24850, s-125, s-18206, all-3153
Molecular Function: purine ribonucleoside triphosphate binding view genes	3 out of 1967 0.15%	21 out of 11955 0.18%	1	n-7270, s-23701, all-1279
Molecular Function: purine ribonucleotide binding view genes	3 out of 1967 0.15%	21 out of 11955 0.18%	1	n-7270, s-23701, all-1279
Molecular Function: phosphatidylinositol binding view genes	3 out of 1967 0.15%	21 out of 11955 0.18%	1	s-51690, s-34941, s-10945
Molecular Function: Wnt-protein binding view genes	2 out of 1967 0.10%	14 out of 11955 0.12%	1	all-69496, n-41352
Molecular Function: histone binding view genes	2 out of 1967 0.10%	14 out of 11955 0.12%	1	n-40204, n-47753
Molecular Function: phospholipid-translocating ATPase activity view genes	2 out of 1967 0.10%	14 out of 11955 0.12%	1	n-51835, n-613
Molecular Function: serine-type peptidase activity view genes	4 out of 1967 0.20%	28 out of 11955 0.23%	1	s-2027, all-13679, n-37054, n-2823
Molecular Function: cysteine-type peptidase activity view genes	8 out of 1967 0.41%	55 out of 11955 0.46%	1	n-62861, n-11632, n-6801, s-52647, s-39886, all-6235, all-71051, all-19796
Molecular Function: PTB domain binding view genes	1 out of 1967 0.05%	7 out of 11955 0.06%	1	all-55952
Molecular Function: oxoglutarate dehydrogenase (succinyl-transferring) activity view genes	1 out of 1967 0.05%	7 out of 11955 0.06%	1	n-2417
Molecular Function: insulin-activated receptor activity view genes	1 out of 1967 0.05%	7 out of 11955 0.06%	1	all-55952
Molecular Function: insulin binding view genes	1 out of 1967 0.05%	7 out of 11955 0.06%	1	all-55952
Molecular Function: trehalose transmembrane transporter activity view genes	1 out of 1967 0.05%	7 out of 11955 0.06%	1	all-28870
Molecular Function: phosphatidylinositol 3-kinase binding view genes	1 out of 1967 0.05%	7 out of 11955 0.06%	1	all-55952
Molecular Function: 1-phosphatidylinositol 4-kinase activity view genes	1 out of 1967 0.05%	7 out of 11955 0.06%	1	n-49339
Molecular Function: phosphoribosylamine-glycine ligase activity view genes	1 out of 1967 0.05%	7 out of 11955 0.06%	1	all-3847
Molecular Function: ferric iron binding view genes	1 out of 1967 0.05%	7 out of 11955 0.06%	1	s-48293
Molecular Function: blue light photoreceptor activity view genes	1 out of 1967 0.05%	7 out of 11955 0.06%	1	n-40193
Molecular Function: phosphoribosylformylglycinamidine cyclo-ligase activity view genes	1 out of 1967 0.05%	7 out of 11955 0.06%	1	all-3847
Molecular Function: insulin receptor substrate binding view genes	1 out of 1967 0.05%	7 out of 11955 0.06%	1	all-55952
Molecular Function: SNARE binding view genes	1 out of 1967 0.05%	7 out of 11955 0.06%	1	all-6986
Molecular Function: catalase activity view genes	1 out of 1967 0.05%	7 out of 11955 0.06%	1	s-31024
Molecular Function: ATP citrate synthase activity view genes	1 out of 1967 0.05%	7 out of 11955 0.06%	1	all-1279
Molecular Function: N-acetyltransferase activity view genes	1 out of 1967 0.05%	7 out of 11955 0.06%	1	n-5354
Molecular Function: neurotrophin receptor activity view genes	1 out of 1967 0.05%	7 out of 11955 0.06%	1	all-55952
Molecular Function: hydrolase activity, acting on acid anhydrides, in phosphorus-containing anhydrides view genes	1 out of 1967 0.05%	7 out of 11955 0.06%	1	n-47546
Molecular Function: phosphoribosylglycinamide formyltransferase activity view genes	1 out of 1967 0.05%	7 out of 11955 0.06%	1	all-3847
Molecular Function: inositol 1,4,5-trisphosphate-sensitive calcium-release channel activity view genes	1 out of 1967 0.05%	7 out of 11955 0.06%	1	n-25993
Molecular Function: hydroxymethyl-, formyl- and related transferase activity view genes	1 out of 1967 0.05%	7 out of 11955 0.06%	1	all-1339
Molecular Function: copper ion binding view genes	1 out of 1967 0.05%	7 out of 11955 0.06%	1	s-7097
Molecular Function: substrate-specific transporter activity view genes	1 out of 1967 0.05%	7 out of 11955 0.06%	1	n-2601
Molecular Function: P-P-bond-hydrolysis-driven protein transmembrane transporter activity view genes	1 out of 1967 0.05%	7 out of 11955 0.06%	1	all-41958
Molecular Function: molybdenum ion binding view genes	1 out of 1967 0.05%	7 out of 11955 0.06%	1	all-27319
Molecular Function: beta-N-acetylhexosaminidase activity view genes	1 out of 1967 0.05%	7 out of 11955 0.06%	1	all-71180
Molecular Function: signaling pattern recognition receptor activity view genes	1 out of 1967 0.05%	7 out of 11955 0.06%	1	n-16076
Molecular Function: histone deacetylase activity (H4-K16 specific) view genes	1 out of 1967 0.05%	7 out of 11955 0.06%	1	s-21123
Molecular Function: cation-transporting ATPase activity view genes	4 out of 1967 0.20%	29 out of 11955 0.24%	1	all-5415, n-51835, n-613, s-53686
Molecular Function: purine ribonucleoside binding view genes	3 out of 1967 0.15%	22 out of 11955 0.18%	1	n-7270, s-23701, all-1279
Molecular Function: hydrolase activity, acting on acid anhydrides view genes	2 out of 1967 0.10%	15 out of 11955 0.13%	1	all-24890, all-5415
Molecular Function: heat shock protein binding view genes	2 out of 1967 0.10%	15 out of 11955 0.13%	1	all-785, s-21479
Molecular Function: chaperone binding view genes	2 out of 1967 0.10%	15 out of 11955 0.13%	1	n-20246, n-3004
Molecular Function: RNA polymerase II transcription factor binding view genes	2 out of 1967 0.10%	15 out of 11955 0.13%	1	all-51606, all-63068
Molecular Function: magnesium ion binding view genes	9 out of 1967 0.46%	64 out of 11955 0.54%	1	s-27278, s-52709, n-7489, n-12286, n-51835, n-613, n-12253, n-42871, all-4569
Molecular Function: phosphatase activity view genes	9 out of 1967 0.46%	64 out of 11955 0.54%	1	all-71552, all-25771, s-31161, s-13848, n-36337, all-8500, all-50902, n-62711, all-3914
Molecular Function: protein kinase C activity view genes	3 out of 1967 0.15%	23 out of 11955 0.19%	1	all-7991, n-22553, all-12475
Molecular Function: insulin-like growth factor receptor binding view genes	1 out of 1967 0.05%	8 out of 11955 0.07%	1	n-40541
Molecular Function: acyl-[acyl-carrier-protein] hydrolase activity view genes	1 out of 1967 0.05%	8 out of 11955 0.07%	1	n-58640
Molecular Function: ionotropic glutamate receptor activity view genes	1 out of 1967 0.05%	8 out of 11955 0.07%	1	n-34155
Molecular Function: myosin light chain kinase activity view genes	1 out of 1967 0.05%	8 out of 11955 0.07%	1	all-16043
Molecular Function: SH2 domain binding view genes	1 out of 1967 0.05%	8 out of 11955 0.07%	1	all-55952
Molecular Function: ribosome binding view genes	1 out of 1967 0.05%	8 out of 11955 0.07%	1	all-44
Molecular Function: protein serine/threonine/tyrosine kinase activity view genes	1 out of 1967 0.05%	8 out of 11955 0.07%	1	n-22966
Molecular Function: transferase activity, transferring one-carbon groups view genes	1 out of 1967 0.05%	8 out of 11955 0.07%	1	all-5980
Molecular Function: NAD+ binding view genes	1 out of 1967 0.05%	8 out of 11955 0.07%	1	n-41720
Molecular Function: transcription cofactor activity view genes	1 out of 1967 0.05%	8 out of 11955 0.07%	1	n-10591
Molecular Function: amino acid binding view genes	1 out of 1967 0.05%	8 out of 11955 0.07%	1	n-63428
Molecular Function: oxidoreductase activity, acting on CH or CH2 groups view genes	1 out of 1967 0.05%	8 out of 11955 0.07%	1	n-7691
Molecular Function: hydrolase activity, acting on glycosyl bonds view genes	10 out of 1967 0.51%	72 out of 11955 0.60%	1	all-62721, all-5020, s-53885, n-848, n-22004, s-51358, n-32, all-10998, all-42137, n-48010
Molecular Function: calcium ion binding view genes	36 out of 1967 1.83%	242 out of 11955 2.02%	1	n-12525, all-19383, all-6262, n-33425, all-3161, n-65359, n-5164, all-935, n-1203, n-63007, all-17360, s-20087, n-63292, n-21074, n-64077, n-46804, n-14874, n-19565, all-63964, s-16765, all-29210, all-70552, n-65004, n-28516, all-44016, s-3890, all-23124, all-6986, n-58430, all-48036, all-55425, all-20302, n-37457, all-28350, all-1333, all-7753
Molecular Function: hydrolase activity view genes	101 out of 1967 5.13%	653 out of 11955 5.46%	1	s-4794, n-26528, s-31155, all-739, n-997, all-21573, n-51778, n-23578, s-2927, n-64937, n-12410, n-33264, all-41747, n-65249, all-7179, all-20800, n-31244, n-62980, n-23538, all-677, all-4119, all-23859, all-2003, s-1597, n-27676, all-52412, n-15231, s-974, all-5020, s-27667, all-59048, n-10739, all-68864, all-70183, n-64238, n-24933, all-30404, all-42137, all-14238, s-11190, n-2729, all-62721, a…
Molecular Function: transferase activity, transferring hexosyl groups view genes	4 out of 1967 0.20%	31 out of 11955 0.26%	1	n-28771, all-70534, n-48413, s-7952
Molecular Function: transferase activity, transferring glycosyl groups view genes	9 out of 1967 0.46%	66 out of 11955 0.55%	1	n-63265, s-6250, s-3505, n-1266, all-6770, n-28771, s-53686, all-42083, s-3400
Molecular Function: transmembrane signaling receptor activity view genes	3 out of 1967 0.15%	24 out of 11955 0.20%	1	n-7029, n-64932, n-41352
Molecular Function: hydrolase activity, acting on carbon-nitrogen (but not peptide) bonds view genes	3 out of 1967 0.15%	24 out of 11955 0.20%	1	s-27667, n-19162, all-55562
Molecular Function: protein tyrosine kinase activity view genes	9 out of 1967 0.46%	67 out of 11955 0.56%	1	all-24551, n-1800, all-544, all-36854, all-18402, n-31234, s-5859, all-43245, all-145
Molecular Function: hydrolase activity, acting on ester bonds view genes	2 out of 1967 0.10%	17 out of 11955 0.14%	1	n-64733, n-65249
Molecular Function: 3',5'-cyclic-nucleotide phosphodiesterase activity view genes	2 out of 1967 0.10%	17 out of 11955 0.14%	1	all-11034, all-38035
Molecular Function: glutathione transferase activity view genes	1 out of 1967 0.05%	9 out of 11955 0.08%	1	all-16868
Molecular Function: chromatin insulator sequence binding view genes	1 out of 1967 0.05%	9 out of 11955 0.08%	1	all-3847
Molecular Function: DNA topoisomerase type II (ATP-hydrolyzing) activity view genes	1 out of 1967 0.05%	9 out of 11955 0.08%	1	s-51059
Molecular Function: chitin binding view genes	1 out of 1967 0.05%	9 out of 11955 0.08%	1	s-5608
Molecular Function: photoreceptor activity view genes	1 out of 1967 0.05%	9 out of 11955 0.08%	1	n-19770
Molecular Function: histone methyltransferase activity (H3-K9 specific) view genes	1 out of 1967 0.05%	9 out of 11955 0.08%	1	n-40204
Molecular Function: structural constituent of eye lens view genes	1 out of 1967 0.05%	9 out of 11955 0.08%	1	n-40193
Molecular Function: xenobiotic-transporting ATPase activity view genes	1 out of 1967 0.05%	9 out of 11955 0.08%	1	n-6660
Molecular Function: extracellular ligand-gated ion channel activity view genes	3 out of 1967 0.15%	25 out of 11955 0.21%	1	n-64851, n-19035, all-4989
Molecular Function: signal transducer activity view genes	16 out of 1967 0.81%	115 out of 11955 0.96%	1	all-1645, n-64932, all-46201, all-25801, all-3953, all-246, n-3855, n-11881, n-37678, n-8232, all-70856, all-6355, all-11735, all-145, n-20537, all-64460
Molecular Function: amino acid transmembrane transporter activity view genes	6 out of 1967 0.31%	47 out of 11955 0.39%	1	n-32439, n-30100, n-2447, s-38557, all-55589, n-59916
Molecular Function: phosphoric diester hydrolase activity view genes	2 out of 1967 0.10%	18 out of 11955 0.15%	1	all-31082, n-7585
Molecular Function: RNA helicase activity view genes	2 out of 1967 0.10%	18 out of 11955 0.15%	1	n-25146, n-32631
Molecular Function: steroid hormone receptor activity view genes	2 out of 1967 0.10%	18 out of 11955 0.15%	1	all-3135, n-5430
Molecular Function: hydrolase activity, hydrolyzing O-glycosyl compounds view genes	8 out of 1967 0.41%	62 out of 11955 0.52%	1	all-6293, all-14545, n-3441, all-28167, all-14438, all-8514, n-23717, all-32023
Molecular Function: Ran GTPase binding view genes	3 out of 1967 0.15%	26 out of 11955 0.22%	1	n-25959, n-46159, n-11701
Molecular Function: transcription regulatory region sequence-specific DNA binding view genes	4 out of 1967 0.20%	34 out of 11955 0.28%	1	n-16760, s-52447, all-10334, n-50430
Molecular Function: guanylate cyclase activity view genes	1 out of 1967 0.05%	10 out of 11955 0.08%	1	s-1365
Molecular Function: thiamine pyrophosphate binding view genes	1 out of 1967 0.05%	10 out of 11955 0.08%	1	n-2417
Molecular Function: nitric-oxide synthase activity view genes	1 out of 1967 0.05%	10 out of 11955 0.08%	1	n-63930
Molecular Function: DNA photolyase activity view genes	1 out of 1967 0.05%	10 out of 11955 0.08%	1	n-40193
Molecular Function: acyl-CoA oxidase activity view genes	1 out of 1967 0.05%	10 out of 11955 0.08%	1	all-23403
Molecular Function: bitter taste receptor activity view genes	1 out of 1967 0.05%	10 out of 11955 0.08%	1	n-37630
Molecular Function: protein N-terminus binding view genes	1 out of 1967 0.05%	10 out of 11955 0.08%	1	all-44358
Molecular Function: double-stranded DNA binding view genes	1 out of 1967 0.05%	10 out of 11955 0.08%	1	n-21997
Molecular Function: ATP-dependent helicase activity view genes	17 out of 1967 0.86%	125 out of 11955 1.05%	1	all-20476, all-11327, all-707, all-54279, all-71047, n-25146, n-63371, n-42508, all-23124, n-32631, all-10420, n-62845, all-71465, n-44136, n-3028, all-35938, n-4012
Molecular Function: rRNA binding view genes	2 out of 1967 0.10%	19 out of 11955 0.16%	1	n-62969, all-33588
Molecular Function: catalytic activity view genes	146 out of 1967 7.42%	952 out of 11955 7.96%	1	n-46655, n-62835, n-64740, all-21137, s-54908, all-940, all-18102, all-3434, n-41709, all-70734, all-40925, all-711, n-9006, all-53863, n-7672, all-56813, all-57847, n-3729, n-36051, s-33569, all-71093, s-5100, n-6067, n-53050, s-51059, s-21506, n-10886, all-48463, n-6, all-3104, n-1341, all-27067, n-6715, all-11575, s-974, n-3696, all-23266, s-7856, n-45976, n-10587, all-70548, all-19116, all-68…
Molecular Function: iron ion binding view genes	8 out of 1967 0.41%	64 out of 11955 0.54%	1	n-62478, n-19676, all-71788, n-210, n-63428, all-24568, all-10352, n-6363
Molecular Function: protein tyrosine phosphatase activity view genes	7 out of 1967 0.36%	57 out of 11955 0.48%	1	all-3392, all-70552, all-14372, all-63463, s-13848, n-2270, all-13983
Molecular Function: ATP-dependent RNA helicase activity view genes	4 out of 1967 0.20%	35 out of 11955 0.29%	1	n-63371, n-42508, n-63788, n-4012
Molecular Function: DNA topoisomerase activity view genes	9 out of 1967 0.46%	72 out of 11955 0.60%	1	n-6853, n-63407, all-728, all-5243, all-24162, n-6618, n-23546, n-59272, all-45922
Molecular Function: Ras GTPase activator activity view genes	1 out of 1967 0.05%	11 out of 11955 0.09%	1	all-57782
Molecular Function: alpha-glucosidase activity view genes	1 out of 1967 0.05%	11 out of 11955 0.09%	1	s-53787
Molecular Function: acetyl-CoA carboxylase activity view genes	1 out of 1967 0.05%	11 out of 11955 0.09%	1	all-40325
Molecular Function: SAM domain binding view genes	1 out of 1967 0.05%	11 out of 11955 0.09%	1	all-63463
Molecular Function: cell adhesion molecule binding view genes	1 out of 1967 0.05%	11 out of 11955 0.09%	1	n-32876
Molecular Function: myosin binding view genes	3 out of 1967 0.15%	28 out of 11955 0.23%	1	all-63068, all-34491, all-3099
Molecular Function: calcium channel activity view genes	2 out of 1967 0.10%	20 out of 11955 0.17%	1	s-53239, n-4206
Molecular Function: acid-amino acid ligase activity view genes	2 out of 1967 0.10%	20 out of 11955 0.17%	1	s-11194, s-11524
Molecular Function: protein serine/threonine kinase activity view genes	35 out of 1967 1.78%	249 out of 11955 2.08%	1	n-41116, all-6962, all-38286, s-30413, s-50594, n-5761, n-11019, s-55122, s-51451, n-29101, all-61878, n-17108, s-3400, all-49335, all-2891, n-65034, n-22966, s-52962, n-36618, s-52601, all-16043, all-11554, n-7231, s-13486, s-12090, all-37546, all-887, all-5339, all-27072, n-54102, n-11920, n-20537, all-46488, s-27009, s-26837
Molecular Function: protein kinase activity view genes	30 out of 1967 1.53%	218 out of 11955 1.82%	1	n-33977, all-24551, n-65318, all-69496, s-51837, s-30413, n-5761, s-47985, n-53144, all-38036, n-18470, s-5407, s-3400, all-41136, all-70277, s-762, all-66945, n-46953, n-62214, n-22966, all-42436, all-1177, all-40866, all-6986, s-22282, all-5339, n-19342, all-53797, all-66588, s-27009
Molecular Function: JUN kinase binding view genes	1 out of 1967 0.05%	12 out of 11955 0.10%	1	n-4012
Molecular Function: Rho GTPase activator activity view genes	1 out of 1967 0.05%	12 out of 11955 0.10%	1	n-65174
Molecular Function: Notch binding view genes	3 out of 1967 0.15%	30 out of 11955 0.25%	1	s-13971, all-3847, n-13434
Molecular Function: sterol transporter activity view genes	3 out of 1967 0.15%	30 out of 11955 0.25%	1	all-61248, n-32044, all-67190
Molecular Function: sequence-specific DNA binding RNA polymerase II transcription factor activity view genes	11 out of 1967 0.56%	91 out of 11955 0.76%	1	n-63407, n-16760, n-4084, n-4392, n-19484, all-24162, n-17218, s-6580, s-25381, s-30312, all-10334
Molecular Function: solute:sodium symporter activity view genes	1 out of 1967 0.05%	13 out of 11955 0.11%	1	n-30100
Molecular Function: adenyl nucleotide binding view genes	1 out of 1967 0.05%	13 out of 11955 0.11%	1	s-53446
Molecular Function: acetylcholine-gated cation channel activity view genes	1 out of 1967 0.05%	13 out of 11955 0.11%	1	s-28063
Molecular Function: beta-catenin binding view genes	1 out of 1967 0.05%	13 out of 11955 0.11%	1	n-39928
Molecular Function: diacylglycerol binding view genes	1 out of 1967 0.05%	13 out of 11955 0.11%	1	n-5164
Molecular Function: exonuclease activity view genes	1 out of 1967 0.05%	13 out of 11955 0.11%	1	n-4782
Molecular Function: enzyme binding view genes	3 out of 1967 0.15%	31 out of 11955 0.26%	1	n-62845, n-32631, all-13991
Molecular Function: nuclease activity view genes	3 out of 1967 0.15%	31 out of 11955 0.26%	1	n-227, n-20948, n-17694
Molecular Function: NAD-dependent histone deacetylase activity view genes	1 out of 1967 0.05%	14 out of 11955 0.12%	1	s-21123
Molecular Function: small GTPase regulator activity view genes	1 out of 1967 0.05%	14 out of 11955 0.12%	1	n-41116
Molecular Function: aminoacyl-tRNA editing activity view genes	1 out of 1967 0.05%	14 out of 11955 0.12%	1	n-43224
Molecular Function: tRNA binding view genes	1 out of 1967 0.05%	14 out of 11955 0.12%	1	n-2787
Molecular Function: phosphorus-oxygen lyase activity view genes	1 out of 1967 0.05%	14 out of 11955 0.12%	1	n-150
Molecular Function: microtubule binding view genes	8 out of 1967 0.41%	72 out of 11955 0.60%	1	n-54836, all-71296, n-57223, n-12253, s-53683, all-8572, all-37753, n-24632
Molecular Function: guanyl-nucleotide exchange factor activity view genes	2 out of 1967 0.10%	24 out of 11955 0.20%	1	all-9234, all-24278
Molecular Function: phosphotransferase activity, alcohol group as acceptor view genes	5 out of 1967 0.25%	50 out of 11955 0.42%	1	n-49339, all-7516, n-19342, all-12828, all-30965
Molecular Function: JUN kinase activity view genes	1 out of 1967 0.05%	15 out of 11955 0.13%	1	all-44358
Molecular Function: MAP kinase activity view genes	1 out of 1967 0.05%	15 out of 11955 0.13%	1	all-44358
Molecular Function: sulfuric ester hydrolase activity view genes	1 out of 1967 0.05%	15 out of 11955 0.13%	1	n-64353
Molecular Function: acetylcholinesterase activity view genes	1 out of 1967 0.05%	15 out of 11955 0.13%	1	all-27778
Molecular Function: ubiquitin-specific protease activity view genes	1 out of 1967 0.05%	15 out of 11955 0.13%	1	s-27987
Molecular Function: FMN binding view genes	1 out of 1967 0.05%	15 out of 11955 0.13%	1	all-10486
Molecular Function: polypeptide N-acetylgalactosaminyltransferase activity view genes	1 out of 1967 0.05%	15 out of 11955 0.13%	1	n-15184
Molecular Function: structural constituent of ribosome view genes	21 out of 1967 1.07%	167 out of 11955 1.40%	1	n-64501, all-594, all-38469, s-6651, n-32434, s-46028, all-705, all-1313, all-33588, all-41319, s-52233, n-62969, all-71211, n-4175, n-4378, s-55144, n-20593, s-53792, n-62958, n-2446, n-8077
Molecular Function: oxidoreductase activity, acting on CH-OH group of donors view genes	2 out of 1967 0.10%	25 out of 11955 0.21%	1	n-62733, n-43186
Molecular Function: DNA-directed DNA polymerase activity view genes	2 out of 1967 0.10%	25 out of 11955 0.21%	1	all-7096, all-70977
Molecular Function: organic cation transmembrane transporter activity view genes	2 out of 1967 0.10%	25 out of 11955 0.21%	1	n-64738, all-14865
Molecular Function: GTPase activator activity view genes	2 out of 1967 0.10%	26 out of 11955 0.22%	1	n-1096, all-2542
Molecular Function: receptor binding view genes	1 out of 1967 0.05%	16 out of 11955 0.13%	1	all-71848
Molecular Function: protein self-association view genes	2 out of 1967 0.10%	27 out of 11955 0.23%	1	n-13404, n-4012
Molecular Function: DNA helicase activity view genes	2 out of 1967 0.10%	27 out of 11955 0.23%	1	n-36316, n-3687
Molecular Function: hydro-lyase activity view genes	1 out of 1967 0.05%	17 out of 11955 0.14%	1	n-13425
Molecular Function: acetylcholine-activated cation-selective channel activity view genes	1 out of 1967 0.05%	17 out of 11955 0.14%	1	s-28063
Molecular Function: chromatin binding view genes	9 out of 1967 0.46%	86 out of 11955 0.72%	1	s-44925, n-3004, all-54279, s-52229, n-63915, n-20246, all-57115, n-36041, n-3687
Molecular Function: mismatched DNA binding view genes	1 out of 1967 0.05%	18 out of 11955 0.15%	1	all-50181
Molecular Function: monoamine transmembrane transporter activity view genes	1 out of 1967 0.05%	18 out of 11955 0.15%	1	n-52848
Molecular Function: acetylcholine receptor activity view genes	1 out of 1967 0.05%	18 out of 11955 0.15%	1	s-28063
Molecular Function: oxidoreductase activity view genes	75 out of 1967 3.81%	542 out of 11955 4.53%	1	n-19676, all-9211, n-61373, all-19303, all-22505, n-7691, n-43582, s-14313, n-17706, all-10724, all-18921, all-15222, n-22831, n-6363, all-3104, s-50617, all-9949, all-11327, n-58640, all-27319, s-20280, n-41301, n-64866, n-50312, s-18929, all-34396, all-10052, s-5739, n-38032, n-59637, n-62746, all-26475, all-19290, all-17965, s-22830, all-8402, all-26389, s-114, n-43186, n-60493, s-53402, n-187…
Molecular Function: anion binding view genes	7 out of 1967 0.36%	72 out of 11955 0.60%	1	all-2223, n-63930, n-17108, all-887, all-61480, n-18039, all-57628
Molecular Function: transmembrane transporter activity view genes	3 out of 1967 0.15%	39 out of 11955 0.33%	1	n-62708, n-6713, all-5415
Molecular Function: nucleotidyltransferase activity view genes	4 out of 1967 0.20%	48 out of 11955 0.40%	1	n-63223, all-58372, n-24840, n-1571
Molecular Function: DNA-dependent ATPase activity view genes	2 out of 1967 0.10%	30 out of 11955 0.25%	1	n-36316, all-54279
Molecular Function: metal ion binding view genes	113 out of 1967 5.74%	798 out of 11955 6.68%	1	s-35016, all-6262, all-1645, s-28159, n-12231, n-4235, n-17017, n-7691, all-705, n-25458, n-33859, n-32785, all-39885, s-51761, n-19162, s-31024, all-10724, n-5720, all-18921, all-4621, n-23727, all-30792, n-23445, all-36135, n-63734, all-31407, s-27667, n-14667, n-19484, all-6341, n-62733, n-37945, s-53787, n-26219, all-71608, s-53686, n-46804, s-34185, all-6355, all-10826, n-63839, all-8744, n-…
Molecular Function: NAD+ ADP-ribosyltransferase activity view genes	1 out of 1967 0.05%	20 out of 11955 0.17%	1	n-51756
Molecular Function: neurotransmitter:sodium symporter activity view genes	1 out of 1967 0.05%	20 out of 11955 0.17%	1	s-27996
Molecular Function: DNA topoisomerase type I activity view genes	2 out of 1967 0.10%	31 out of 11955 0.26%	1	all-5552, all-2635
Molecular Function: nucleoside-triphosphatase activity view genes	39 out of 1967 1.98%	308 out of 11955 2.58%	1	all-70952, n-1474, n-10926, all-42947, s-51958, s-25381, all-41747, all-443, n-12219, all-8398, all-707, n-41312, all-18107, n-3492, n-64651, n-42389, all-6624, n-17588, all-40829, n-16176, s-32000, all-52393, all-7406, n-20454, all-45927, s-10364, all-22727, all-9279, n-7225, n-65004, all-71688, all-10420, all-16683, all-8048, n-52116, all-12902, all-22096, all-16391, all-42099
Molecular Function: DNA binding view genes	66 out of 1967 3.36%	494 out of 11955 4.13%	1	s-35016, n-16760, all-55380, n-27155, all-63068, n-28537, all-57115, s-15951, n-8049, s-19388, s-1451, n-41312, all-67493, n-4392, n-27690, all-37835, s-48735, all-23398, all-46687, all-2634, all-5243, n-19118, n-12764, n-64651, n-986, n-64112, n-62860, n-62798, all-70977, all-8556, s-1397, n-19484, n-63353, n-4457, all-9449, s-18216, all-2635, n-19525, n-37054, s-54322, n-613, n-53492, n-7512, n…
Molecular Function: Rho guanyl-nucleotide exchange factor activity view genes	1 out of 1967 0.05%	21 out of 11955 0.18%	1	all-70492
Molecular Function: ubiquitin thiolesterase activity view genes	3 out of 1967 0.15%	42 out of 11955 0.35%	1	all-9449, all-8246, all-28977
Molecular Function: translation repressor activity, nucleic acid binding view genes	2 out of 1967 0.10%	33 out of 11955 0.28%	1	all-17023, n-19317
Molecular Function: structural constituent of muscle view genes	1 out of 1967 0.05%	22 out of 11955 0.18%	1	all-57628
Molecular Function: nucleotide binding view genes	100 out of 1967 5.08%	725 out of 11955 6.06%	1	n-63930, n-10926, s-30413, n-18646, all-33102, all-4417, n-16246, n-41709, n-25458, n-32785, all-711, s-53202, n-7672, all-7599, n-22966, all-16812, all-11554, all-36854, s-31004, all-6644, s-36122, n-5155, all-11987, all-71103, s-39216, all-9911, all-5965, n-42389, n-20434, s-11690, all-40829, all-7652, n-20555, all-71512, n-24045, s-27933, all-55952, s-51451, n-63944, n-37054, s-53686, all-1082…
Molecular Function: sequence-specific DNA binding transcription factor activity view genes	23 out of 1967 1.17%	202 out of 11955 1.69%	1	n-150, n-7633, s-18216, n-21997, all-37842, n-613, s-52447, all-10334, n-5430, n-27290, s-12026, all-3506, all-37835, s-7697, n-64210, n-21598, n-14277, n-50430, all-3743, all-32155, all-9431, n-64791, n-36041
Molecular Function: RNA polymerase II regulatory region sequence-specific DNA binding view genes	3 out of 1967 0.15%	45 out of 11955 0.38%	1	s-35016, n-36316, n-21997
Molecular Function: ATP binding view genes	171 out of 1967 8.69%	1200 out of 11955 10.04%	1	all-70952, all-37842, s-51958, n-18646, all-70479, all-1006, n-14772, n-22966, n-39928, n-25146, n-63371, n-2787, all-5965, n-28240, all-20476, n-6393, all-11327, n-24045, n-42508, n-20454, s-51451, n-1868, all-61878, all-51772, s-34185, s-11917, n-65034, all-52321, n-46953, all-2223, n-12168, all-9771, all-16683, all-64460, all-30965, s-26837, all-66020, n-41116, n-4431, n-11019, all-40509, n-22…
Molecular Function: ATPase activity view genes	33 out of 1967 1.68%	285 out of 11955 2.38%	1	all-70952, n-4431, n-5961, all-38469, all-24890, s-51958, n-4788, all-1006, n-51154, all-16812, n-49889, s-33755, n-3492, all-5965, n-1378, n-14956, s-32000, n-12286, n-20454, all-24222, n-13442, n-37054, n-62938, n-7225, all-71688, n-65004, n-65335, n-12907, all-12513, all-16683, n-52116, all-17983, all-16391
Molecular Function: transferase activity view genes	63 out of 1967 3.20%	496 out of 11955 4.15%	1	n-64028, s-125, all-18821, n-22331, all-71113, all-13316, n-63419, all-26389, n-48413, n-6049, all-40325, all-69931, n-62836, n-52588, all-4621, s-32872, n-31234, s-6079, n-5603, all-71330, n-56800, n-63232, all-11352, n-1884, n-8922, n-13773, all-66588, n-2394, all-15196, all-14005, n-9298, s-48451, n-37622, all-70680, all-16868, n-63881, all-19116, n-7063, s-1027, s-15675, s-20016, s-20297, all…
Molecular Function: cation transmembrane transporter activity view genes	2 out of 1967 0.10%	40 out of 11955 0.33%	1	n-52848, all-56397
Molecular Function: transferase activity, transferring phosphorus-containing groups view genes	22 out of 1967 1.12%	210 out of 11955 1.76%	1	all-57096, s-1365, all-67241, n-51778, n-9646, s-53747, all-13316, all-43245, all-65024, all-41136, all-2891, s-762, s-3898, n-62236, all-544, n-12168, s-49594, all-37546, n-64676, n-28702, all-4279, all-46488
Molecular Function: microtubule motor activity view genes	20 out of 1967 1.02%	199 out of 11955 1.66%	1	all-70952, n-4431, all-38469, s-51958, all-24222, all-1006, n-51154, all-37753, n-24632, n-7225, n-54836, n-65004, all-71688, n-49889, s-33755, all-16683, n-3492, all-32073, all-17983, all-5965
Molecular Function: transporter activity view genes	9 out of 1967 0.46%	116 out of 11955 0.97%	1	n-1474, all-839, n-5633, all-21573, n-65335, all-7406, n-3562, s-25342, all-5755
Molecular Function: phospholipid binding view genes	4 out of 1967 0.20%	77 out of 11955 0.64%	1	n-36667, n-7289, s-24369, all-19437
Molecular Function: ATPase activity, coupled to transmembrane movement of substances view genes	3 out of 1967 0.15%	67 out of 11955 0.56%	1	n-6660, all-48122, all-42452
Molecular Function: zinc ion binding view genes	47 out of 1967 2.39%	432 out of 11955 3.61%	1	n-63930, all-9211, all-1520, n-1221, n-22553, all-3099, all-3135, n-8049, n-4012, s-172, all-10558, n-41866, all-67493, all-23398, all-2324, all-26007, all-56309, n-19118, n-63734, all-9431, n-39587, n-64791, all-21364, n-20555, n-63907, all-24383, all-23266, s-44925, all-25801, n-21997, n-20454, all-13608, s-53286, all-53170, n-5430, n-7585, all-71051, all-52321, n-63454, all-55425, s-1550, s-18…
Molecular Function: ubiquitin-protein ligase activity view genes	10 out of 1967 0.51%	152 out of 11955 1.27%	1	all-25801, n-17867, s-53286, all-71608, all-18605, n-744, n-20522, all-26007, n-31669, n-31748
Molecular Function: ion channel activity view genes	2 out of 1967 0.10%	68 out of 11955 0.57%	1	n-25993, all-28354
Molecular Function: ion binding view genes	26 out of 1967 1.32%	337 out of 11955 2.82%	1	n-46655, n-10926, s-6960, all-9602, n-18646, n-7691, s-25381, all-70277, all-443, all-7279, s-5608, all-12475, n-18039, all-71254, all-23266, all-55952, s-51451, n-63944, n-26219, all-38036, n-46945, n-13675, n-1800, all-25821, s-22282, all-3678
